# Supplementary material for: Nitrogen-to-functionalized carbon atom transmutation of pyridine
Source: Royal Society of Chemistry journal article supplement (doi:10.1039/d4sc04413d), 2024-01-01

## Nitrogen-to-functionalized carbon atom transmutation of pyridine

Fu-Peng Wu,<sup>1</sup> Madina Lenz,<sup>1</sup> Adhya Suresh<sup>2, †</sup>, Achyut R. Gogoi<sup>2, †</sup>, Jasper L. Tyler,<sup>1</sup> Constantin G. Daniliuc,<sup>1</sup> Osvaldo Gutierrez<sup>2,\*</sup>, and Frank Glorius<sup>1,\*</sup>

<sup>1</sup>Organisch-Chemisches Institut, Universität Münster, Münster, Germany

<sup>2</sup>Department of Chemistry, Texas A&M University, College Station, Texas United States

\*Correspondence to: [glorius@uni-muenster.de](mailto:glorius@uni-muenster.de); [og.labs@tamu.edu](mailto:og.labs@tamu.edu)

## Contents

|                                                                                  |      |
|----------------------------------------------------------------------------------|------|
| 1. General information.....                                                      | S3   |
| 1.1 General remarks.....                                                         | S3   |
| 1.2 Analytical techniques and compound purification .....                        | S3   |
| 2. Reaction development .....                                                    | S4   |
| 2.1 Optimization of the reaction conditions.....                                 | S4   |
| 2.2. General procedure for the pyridine-to-benzene reactions .....               | S7   |
| 4. Limitations .....                                                             | S20  |
| 5. X-Ray analysis .....                                                          | S22  |
| 6. DFT calculation.....                                                          | S24  |
| 7. Reference .....                                                               | S135 |
| 8. Copies of $^1\text{H}$ , $^{13}\text{C}$ and $^{19}\text{F}$ NMR spectra..... | S137 |

## 1. General information

### 1.1 General remarks

All reagents were purchased from Alfa Aesar, Sigma-Aldrich, Merck, TCI, Fluorochem, Combi-blocks, VWR and used without further purification, except otherwise stated. All the solvents were bought from Acros in AcroSeal® bottles and were directly stored under 3 or 4 Å molecular sieves, replacing the collected volume with argon. All reactions were carried out in an oven-dried glassware under an atmosphere of argon using standard Schlenk technique, unless otherwise noted. Solvents for chromatographic purification (pentane, EtOAc, dichloromethane and methanol) were purchased as technical grade and purified by atmospheric pressure distillation. Reaction temperatures are referred to the temperature of the heating medium, unless otherwise stated.

### 1.2 Analytical techniques and compound purification

NMR-spectra were recorded on a Bruker Avance II 300, Avance II 400, Agilent DD2 500 or DD2 600 spectrometers. All spectral data was acquired at 295 K, except otherwise stated. Deuterated solvents were purchased from Eurisotop (CDCl<sub>3</sub>, deuteration > 99.8%). <sup>1</sup>H and <sup>13</sup>C chemical shifts (δ) are quoted in parts per million (ppm) against tetramethylsilane (TMS, δ = 0.00 ppm) and were internally referenced to residual CHCl<sub>3</sub> (7.26 ppm for <sup>1</sup>H, 77.0 ppm for <sup>13</sup>C). Coupling constants (J) are reported in Hertz (Hz) to the nearest 0.1 Hz. The following abbreviations (or combinations thereof) were used to explain multiplicities: s = singlet, d = doublet, t = triplet, m = multiplet. High-resolution mass spectra (HRMS) were obtained by the MS service of the Organisch-Chemisches Institut, Universität Münster, using electrospray ionisation (ESI) on a Bruker Daltonics, MicroToF spectrometer and calibrated using formate ion clusters. Thin layer chromatography was carried out on Merck silica gel 60 F254 pre-coated aluminium sheets and were visualized using UV light (254 nm) and stained with basic aqueous potassium permanganate. Flash chromatography was carried out using silica gel (Acros Organics, 0.035-0.070 mm, 60 Å) under a light positive pressure of argon, eluting with the specified solvent system as mentioned.

## 2. Reaction development

### 2.1 Optimization of the reaction conditions

Table 1. Ring open of pyridine.

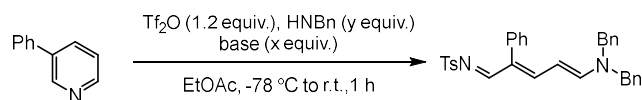

| Entry | Base                           | x   | y   | RSM (%) | Yield (%) |
|-------|--------------------------------|-----|-----|---------|-----------|
| 1     | Collidine                      | 1.0 | 1.2 | 15      | 82        |
| 2     | NaHCO <sub>3</sub>             | 1.0 | 1.2 | 75      | 22        |
| 3     | K <sub>2</sub> CO <sub>3</sub> | 1.0 | 1.2 | 43      | 30        |
| 4     | NaO <sup>t</sup> Bu            | 1.0 | 1.2 | 37      | 56        |
| 5     | KO <sup>t</sup> Bu             | 1.0 | 1.2 | 26      | 57        |
| 6     | KO <sup>t</sup> Bu             | 1.0 | 1.0 | 21      | 71        |
| 7     | KO <sup>t</sup> Bu             | 1.2 | 1.2 | 12      | 80        |

Table 2. Screening of solvent for N-to-C from zincke-imine

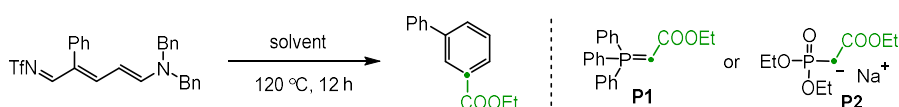

| entry | solvent                         | reagent   | yield (%) |
|-------|---------------------------------|-----------|-----------|
| 1     | Toluene                         | <b>P1</b> | 14        |
| 2     | CH <sub>2</sub> Cl <sub>2</sub> | <b>P1</b> | trace     |
| 3     | THF                             | <b>P1</b> | trace     |
| 4     | DMF                             | <b>P1</b> | trace     |
| 5     | EtOAc                           | <b>P1</b> | 9         |
| 6     | CH <sub>3</sub> CN              | <b>P1</b> | 0         |
| 7     | EtOH                            | <b>P1</b> | 0         |
| 8     | Toluene (r.t.)                  | <b>P1</b> | trace     |
| 9     | CH <sub>2</sub> Cl <sub>2</sub> | <b>P2</b> | 20        |
| 10    | THF                             | <b>P2</b> | 22        |

Reaction conditions: Zincke imine (0.05 mmol), **P1** (1.5 eq.) or **P2** (1.5 eq., prepared from ethyl 2-(diethoxyphosphoryl)acetate and NaH), stirred at 120 °C for 12 h.

Table 3. Screening of conditions for hydrolysis step

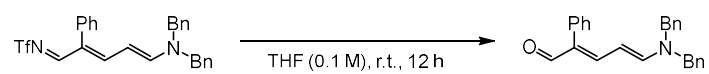

| Entry | Conditions                                                                | RSM (%) | Yield (%) |
|-------|---------------------------------------------------------------------------|---------|-----------|
| 1     | HCl (1 M)                                                                 | 100     | 0         |
| 2     | NaOH (1 M)                                                                | 100     | 0         |
| 3     | Silic gel (50 mg/mL)                                                      | 100     | 0         |
| 4     | NaOH/MeOH (1:1, 1 M)                                                      | 0       | 0         |
| 5     | 110 °C instead of r.t.                                                    | 100     | 0         |
| 6     | NaO <sup>t</sup> Bu (1.0 equiv.), 120 °C                                  | 0       | 0         |
| 7     | NaO <sup>t</sup> Bu (2.0 equiv.), H <sub>2</sub> O (1.0 equiv.)<br>120 °C | 0       | 99        |

Table 4. Screening of amount of base, temperature, and time for hydrolysis step

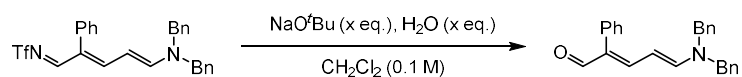

| Entry | X (equiv.) | Temperature | Time   | Yield (%) |
|-------|------------|-------------|--------|-----------|
| 1     | 2.0        | 120         | 15 min | 99        |
| 2     | 1.5        | 120         | 15 min | 99        |
| 3     | 1.2        | 120         | 15 min | 95        |
| 4     | 1.0        | 120         | 15 min | 99        |
| 9     | 2.0        | r.t.        | 24 h   | 98        |

Table 5. Screening of olefination reagent

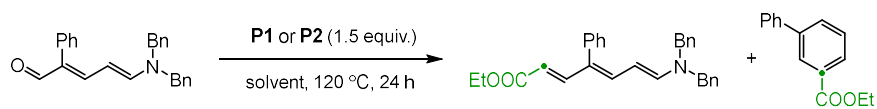

| Entry    | Reagent             | Solvent    | RSM      | Alkene    | Yield (%) |
|----------|---------------------|------------|----------|-----------|-----------|
| 1        | <b>P2</b>           | THF        | 5        | 86        | 4         |
| 2        | <b>P2</b>           | THF/DCM    | 29       | 40        | 9         |
| 3        | <b>P2</b>           | DCM        | 48       | 6         | 14        |
| 4        | <b>P2</b> (140 °C)  | DCM        | 64       | 4         | 17        |
| <b>5</b> | <b>P2</b> (2.0 eq.) | <b>THF</b> | <b>0</b> | <b>94</b> | <b>4</b>  |
| 6        | <b>P1</b>           | DCM        | 74       | 17        | 9         |

Table 6. Screening of additives for ring closure step

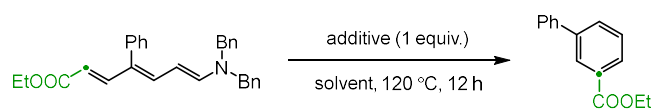

| Entry    | Additive            | solvent                         | Temp. (°C) | RSM (%)  | Yield (%) |
|----------|---------------------|---------------------------------|------------|----------|-----------|
| 1        | -                   | THF                             | 120        | 30       | 64        |
| 2        | NaO <sup>t</sup> Bu | THF                             | 120        | 96       | 4         |
| 3        | AcOH                | THF                             | 120        | 52       | 41        |
| <b>4</b> | <b>HCl (cat)</b>    | <b>THF</b>                      | <b>120</b> | <b>4</b> | <b>94</b> |
| 5        | TFA                 | Toluene                         | 120        | 0        | 34        |
| 6        | -                   | Toluene                         | 120        | 31       | 58        |
| 7        | -                   | CH <sub>2</sub> Cl <sub>2</sub> | 120        | 0        | 86        |
| 8        | -                   | EtOAc                           | 120        | 49       | 44        |

## 2.2. General procedure for the pyridine-to-benzene reactions

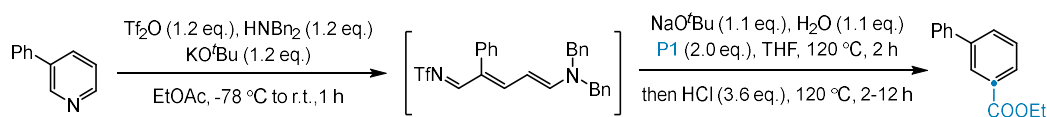

To an oven-dried 10 mL Schlenk tube equipped with a PTFE-coated oval stirring bar was evacuated and re-filled with argon four times, then the vessel was charged with the heterocycle (0.2 mmol) under an argon atmosphere.  $\text{EtOAc}$  (2 mL, 0.1 M) was added, the reaction vessel cooled to  $-78\text{ }^\circ\text{C}$  and  $\text{Tf}_2\text{O}$  (41  $\mu\text{L}$ , 1.2 equiv.) was added dropwise over 5 minutes. The reaction was stirred for 30 minutes before dibenzylamine (46  $\mu\text{L}$ , 1.2 equiv.) was added dropwise as a solution (1.0 M in  $\text{EtOAc}$ ) followed by  $\text{KO}^t\text{Bu}$  (27 mg, 1.2 equiv.). The reaction was stirred for a further 30 minutes at  $-78\text{ }^\circ\text{C}$ . The cooling bath was removed and the reaction was allowed to warm to room temperature while stirring for approximately 30 minutes. The mixture filter over a short plug of silica (1 cm) and the volatiles were removed under reduced pressure to give crude Zincke imines.

A new 10 mL Schlenk tube equipped with a PTFE-coated oval stirring bar was charged with  $\text{NaO}^t\text{Bu}$  (21.1 mg, 1.1 equiv.),  $\text{H}_2\text{O}$  (4  $\mu\text{L}$ , 1.1 equiv.) and THF (1 mL, 0.2 M). The crude Zincke imines was added as a solution (0.2 M in THF, 1 mL) and the reaction was stirred 10 minutes at  $120\text{ }^\circ\text{C}$ . After cooling, phosphonate carbanion (2.0 equiv., the phosphonate carbanion reagent prepared from ethyl 2-(diethoxyphosphoryl)acetate (2.0 equiv.) and  $\text{NaH}$  (2.5 equiv.) in THF (1 mL) at  $0\text{ }^\circ\text{C}$ .) was added as a solution (1 mL, 0.4 M in THF), and the reaction continued for an additional 2 hours at  $120\text{ }^\circ\text{C}$ . Upon cooling to room temperature once again,  $\text{HCl}$  (180  $\mu\text{L}$ , 3.6 equiv., 4 M in dioxane) was added, and the reaction was stirred for an additional 2 hours at  $120\text{ }^\circ\text{C}$ . After reaction complete, the resulting solution was transferred to a 25 mL round bottom flask and volatiles were removed under reduced pressure. Purification by flash column chromatography on  $\text{SiO}_2$  (pentane/ $\text{EtOAc}$ ) afforded the corresponding products.

### 3. Experimental data for the described substances

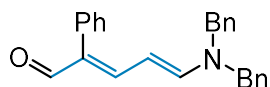

#### 5-(Dibenzylamino)-2-phenylpenta-2,4-dienal (**2a**)

To an oven-dried 10 mL Schlenk tube equipped with a PTFE-coated oval stirring bar was evacuated and re-filled with argon four times, then the vessel was charged with the heterocycle (0.2 mmol) under an argon atmosphere. EtOAc (2 mL, 0.1 M) was added, the reaction vessel cooled to  $-78\text{ }^{\circ}\text{C}$  and  $\text{Ti}_2\text{O}$  (41  $\mu\text{L}$ , 1.2 equiv.) was added dropwise over 5 minutes. The reaction was stirred for 30 minutes before dibenzylamine (46  $\mu\text{L}$ , 1.2 equiv.) was added dropwise as a solution (1.0 M in EtOAc) followed by  $\text{KO}^t\text{Bu}$  (27 mg, 1.2 equiv.). The reaction was stirred for a further 30 minutes at  $-78\text{ }^{\circ}\text{C}$ . The cooling bath was removed and the reaction was allowed to warm to room temperature while stirring for approximately 30 minutes. The mixture filter over a short plug of silica (1 cm) and the volatiles were removed under reduced pressure to give crude Zincke imines. A new 10 mL Schlenk tube equipped with a PTFE-coated oval stirring bar was charged with  $\text{NaO}^t\text{Bu}$  (21.1 mg, 1.1 equiv.),  $\text{H}_2\text{O}$  (4  $\mu\text{L}$ , 1.1 equiv.) and THF (1 mL, 0.2 M). The crude Zincke imines was added as a solution (0.2 M in THF, 1 mL) and the reaction was stirred 10 minutes at  $120\text{ }^{\circ}\text{C}$ . After reaction complete, the resulting solution was transferred to a 25 mL round bottom flask and volatiles were removed under reduced pressure. Purification by flash column chromatography on  $\text{SiO}_2$  (pentane/EtOAc, 3:1 v/v,  $R_f = 0.4$ ) afforded the corresponding products **2a** as yellow solid (56.5 mg, 80% yield). **X-ray** (single-crystal) Yellow block crystals of x-ray diffraction quality was obtained by slow evaporation of saturated solution of **2a** in EtOAc/n-pentane (CCDC 2334460).

$^1\text{H NMR}$  (400 MHz,  $\text{CDCl}_3$ )  $\delta$  9.38 (s, 1H), 7.41 – 7.27 (m, 9H), 7.16 (ddd,  $J = 8.9, 4.9, 2.3$  Hz, 7H), 7.07 (d,  $J = 11.9$  Hz, 1H), 5.73 – 5.56 (m, 1H), 4.32 (s, 4H).

$^{13}\text{C NMR}$  (101 MHz,  $\text{CDCl}_3$ )  $\delta$  191.2, 153.8, 151.9, 135.8, 134.6, 131.0, 129.7, 128.9, 128.1, 128.0, 127.5, 126.7, 97.1, 65.7.

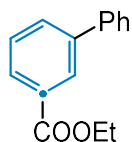

#### Ethyl [1,1'-biphenyl]-3-carboxylate (**4a**)

Prepared according to general procedure using 3-phenyl pyridine (29  $\mu\text{L}$ , 0.2 mmol), ethyl 2-(diethoxyphosphoryl)acetate (80  $\mu\text{L}$ , 2.0 equiv.) were used. Purification by column chromatography using pre-basified silica with pentane/EtOAc (50:1 v/v,  $R_f = 0.4$ ) as eluent afforded **4a** as colorless oil (31.7 mg, 70% yield).



**<sup>1</sup>H NMR (400 MHz, CDCl<sub>3</sub>)** δ 8.31 (td, *J* = 1.9, 0.5 Hz, 1H), 8.05 (ddd, *J* = 7.8, 1.7, 1.2 Hz, 1H), 7.79 (ddd, *J* = 7.8, 2.0, 1.2 Hz, 1H), 7.67 – 7.61 (m, 2H), 7.55 – 7.44 (m, 3H), 7.42 – 7.36 (m, 1H), 4.43 (q, *J* = 7.1 Hz, 2H), 1.43 (t, *J* = 7.1 Hz, 3H).

**<sup>13</sup>C NMR (101 MHz, CDCl<sub>3</sub>)** δ 166.5, 141.4, 140.2, 131.4, 131.0, 128.8, 128.8, 128.3, 128.2, 127.7, 127.1, 61.0, 14.3.

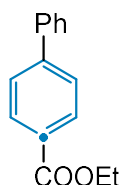

#### **Ethyl [1,1'-biphenyl]-4-carboxylate (4b)**

Prepared according to general procedure using 4-phenylpyridine (31.0 mg, 0.2 mmol), ethyl 2-(diethoxyphosphoryl)acetate (80 uL, 2.0 equiv.) were used. Purification by column chromatography using pre-basified silica with pentane/EtOAc (50:1 v/v, *R<sub>f</sub>* = 0.4) as eluent afforded **4b** as white solid (29.2 mg, 65% yield).

**<sup>1</sup>H NMR (400 MHz, CDCl<sub>3</sub>)** δ 8.17 – 8.07 (m, 2H), 7.70 – 7.59 (m, 4H), 7.47 (ddd, *J* = 7.8, 6.4, 1.3 Hz, 2H), 7.43 – 7.36 (m, 1H), 4.41 (q, *J* = 7.1 Hz, 2H), 1.42 (t, *J* = 7.1 Hz, 3H).

**<sup>13</sup>C NMR (101 MHz, CDCl<sub>3</sub>)** δ 166.5, 145.5, 140.1, 130.0, 129.3, 128.9, 128.1, 127.3, 127.0, 60.9, 14.3.

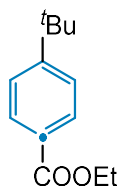

#### **Ethyl 4-(*tert*-butyl)benzoate (4c)**

Prepared according to general procedure using 4-(*tert*-butyl)pyridine (29 uL, 0.2 mmol), ethyl 2-(diethoxyphosphoryl)acetate (80 uL, 2.0 equiv.) were used. Purification by column chromatography using pre-basified silica with pentane/EtOAc (50:1 v/v, *R<sub>f</sub>* = 0.4) as eluent afforded **4c** as colorless oil (30.0 mg, 73% yield).

**<sup>1</sup>H NMR (400 MHz, CDCl<sub>3</sub>)** δ 8.01 – 7.94 (m, 2H), 7.48 – 7.42 (m, 2H), 4.37 (q, *J* = 7.1 Hz, 2H), 1.39 (t, *J* = 7.1 Hz, 3H), 1.34 (s, 9H).

**<sup>13</sup>C NMR (101 MHz, CDCl<sub>3</sub>)** δ 166.6, 156.4, 129.4, 127.7, 125.3, 60.7, 35.0, 31.1, 14.3.

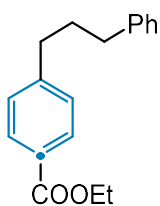

#### Ethyl 4-(3-phenylpropyl)benzoate (4d)

Prepared according to general procedure using 4-(3-phenylpropyl)pyridine (38  $\mu$ L, 0.2 mmol), ethyl 2-(diethoxyphosphoryl)acetate (80  $\mu$ L, 2.0 equiv.) were used. Purification by column chromatography using pre-basified silica with pentane/EtOAc (50:1 v/v,  $R_f$  = 0.4) as eluent afforded **5d** as colorless oil (31.3 mg, 58% yield).

$^1\text{H NMR}$  (400 MHz,  $\text{CDCl}_3$ )  $\delta$  8.03 – 7.88 (m, 2H), 7.33 – 7.14 (m, 7H), 4.35 (q,  $J$  = 7.1 Hz, 2H), 2.66 (dt,  $J$  = 20.4, 7.7 Hz, 4H), 2.04 – 1.91 (m, 2H), 1.38 (t,  $J$  = 7.1 Hz, 3H).

$^{13}\text{C NMR}$  (101 MHz,  $\text{CDCl}_3$ )  $\delta$  166.7, 147.7, 141.9, 129.6, 128.4, 128.3, 128.1, 125.8, 60.7, 35.4, 35.3, 32.6, 14.3.

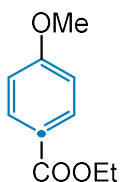

#### Ethyl 4-methoxybenzoate (4e)

Prepared according to general procedure using 4-methoxypyridine (20  $\mu$ L, 0.2 mmol), ethyl 2-(diethoxyphosphoryl)acetate (80  $\mu$ L, 2.0 equiv.) were used. Purification by column chromatography using pre-basified silica with pentane/EtOAc (20:1 v/v,  $R_f$  = 0.45) as eluent afforded **4e** as colorless oil (17.6 mg, 49% yield).

$^1\text{H NMR}$  (400 MHz,  $\text{CDCl}_3$ )  $\delta$  8.04 – 7.95 (m, 2H), 6.96 – 6.88 (m, 2H), 4.35 (q,  $J$  = 7.1 Hz, 2H), 3.86 (s, 3H), 1.38 (t,  $J$  = 7.1 Hz, 3H).

$^{13}\text{C NMR}$  (101 MHz,  $\text{CDCl}_3$ )  $\delta$  166.4, 163.2, 131.5, 123.0, 113.5, 60.6, 55.4, 14.4.

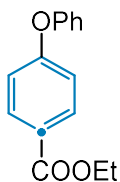

#### Ethyl 4-phenoxybenzoate (4f)

Prepared according to general procedure using 4-phenoxy pyridine (34.2 mg, 0.2 mmol), ethyl 2-(diethoxyphosphoryl)acetate (80  $\mu$ L, 2.0 equiv.) were used. Purification by column chromatography using pre-basified silica with pentane/EtOAc (50:1 v/v,  $R_f$  = 0.5) as eluent afforded **4f** as colorless oil (20.2 mg, 42% yield).

$^1\text{H NMR}$  (400 MHz,  $\text{CDCl}_3$ )  $\delta$  8.05 – 7.97 (m, 2H), 7.43 – 7.35 (m, 2H), 7.22 – 7.15 (m, 1H), 7.09 – 7.02 (m, 2H), 7.02 – 6.95 (m, 2H), 4.36 (q,  $J = 7.1$  Hz, 2H), 1.38 (t,  $J = 7.1$  Hz, 3H).

$^{13}\text{C NMR}$  (101 MHz,  $\text{CDCl}_3$ )  $\delta$  166.1, 161.7, 155.7, 131.6, 130.0, 124.9, 124.4, 120.0, 117.3, 60.8, 14.3.

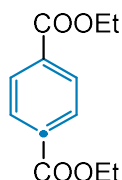

#### Diethyl terephthalate (4g)

Prepared according to general procedure using ethyl isonicotinate (30.2 mg, 0.2 mmol), ethyl 2-(diethoxyphosphoryl)acetate (80  $\mu\text{L}$ , 2.0 equiv.) were used. Purification by column chromatography using pre-basified silica with pentane/EtOAc (20:1 v/v,  $R_f = 0.4$ ) as eluent afforded **4g** as white solid (16.5 mg, 40% yield).

$^1\text{H NMR}$  (400 MHz,  $\text{CDCl}_3$ )  $\delta$  8.10 (s, 4H), 4.41 (q,  $J = 7.1$  Hz, 4H), 1.41 (t,  $J = 7.1$  Hz, 6H).

$^{13}\text{C NMR}$  (101 MHz,  $\text{CDCl}_3$ )  $\delta$  165.9, 134.2, 129.5, 61.4, 14.3.

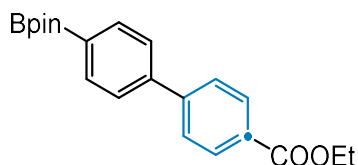

#### Ethyl 4'-(4,4,5,5-tetramethyl-1,3,2-dioxaborolan-2-yl)-[1,1'-biphenyl]-4-carboxylate (4h)

Prepared according to general procedure using 4-(4-(4,4,5,5-tetramethyl-1,3,2-dioxaborolan-2-yl)phenyl)pyridine (56.2  $\mu\text{L}$ , 0.2 mmol), ethyl 2-(diethoxyphosphoryl)acetate (80  $\mu\text{L}$ , 2.0 equiv.) were used. Purification by column chromatography using pre-basified silica with pentane/EtOAc (10:1 v/v,  $R_f = 0.35$ ) as eluent afforded **4h** as yellow solid (36.4 mg, 52% yield).

$^1\text{H NMR}$  (400 MHz,  $\text{CDCl}_3$ )  $\delta$  8.15 – 8.08 (m, 2H), 7.95 – 7.87 (m, 2H), 7.71 – 7.65 (m, 2H), 7.65 – 7.59 (m, 2H), 4.41 (q,  $J = 7.1$  Hz, 2H), 1.42 (t,  $J = 7.1$  Hz, 3H), 1.37 (s, 12H).

$^{13}\text{C NMR}$  (101 MHz,  $\text{CDCl}_3$ )  $\delta$  166.4, 145.3, 142.6, 135.3, 130.0, 129.5, 127.1, 126.5, 83.9, 60.9, 24.9, 14.3.

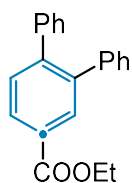

#### Ethyl [1,1':2',1''-terphenyl]-4'-carboxylate (4i)

Prepared according to general procedure using 3,4-diphenylpyridine (46.2 mg, 0.2 mmol), ethyl 2-(diethoxyphosphoryl)acetate (80 uL, 2.0 equiv.) were used. Purification by column chromatography using pre-basified silica with pentane/EtOAc (50:1 v/v, Rf = 0.4) as eluent afforded **4i** as yellow oil (26.4 mg, 44% yield).

**<sup>1</sup>H NMR (400 MHz, CDCl<sub>3</sub>)** δ 8.12 (d, *J* = 1.7 Hz, 1H), 8.08 (dd, *J* = 8.0, 1.9 Hz, 1H), 7.50 (d, *J* = 8.0 Hz, 1H), 7.23 (dd, *J* = 4.7, 1.6 Hz, 6H), 7.19 – 7.11 (m, 4H), 4.42 (q, *J* = 7.1 Hz, 2H), 1.42 (t, *J* = 7.1 Hz, 3H).

**<sup>13</sup>C NMR (101 MHz, CDCl<sub>3</sub>)** δ 166.4, 144.9, 140.7, 140.6, 140.6, 131.7, 130.7, 129.8, 129.7, 129.6, 128.5, 128.0, 127.1, 126.8, 61.0, 14.4.

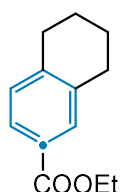

#### **Ethyl 5,6,7,8-tetrahydronaphthalene-2-carboxylate (4j)**

Prepared according to general procedure using 5,6,7,8-tetrahydroisoquinoline (26 uL, 0.2 mmol), ethyl 2-(diethoxyphosphoryl)acetate (80 uL, 2.0 equiv.) were used. Purification by column chromatography using pre-basified silica with pentane/EtOAc (50:1 v/v, Rf = 0.4) as eluent afforded **4j** as yellow oil (31.1 mg, 76% yield).

**<sup>1</sup>H NMR (400 MHz, CDCl<sub>3</sub>)** δ 7.77 – 7.70 (m, 2H), 7.13 – 7.08 (m, 1H), 4.35 (q, *J* = 7.1 Hz, 2H), 2.81 (dq, *J* = 6.7, 3.1 Hz, 4H), 1.81 (ddd, *J* = 6.7, 4.1, 2.9 Hz, 4H), 1.38 (t, *J* = 7.1 Hz, 3H).

**<sup>13</sup>C NMR (101 MHz, CDCl<sub>3</sub>)** δ 166.9, 142.7, 137.2, 130.3, 129.1, 127.6, 126.5, 60.7, 29.6, 29.3, 23.0, 22.9, 14.3.

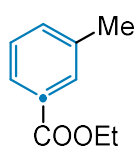

#### **Ethyl 3-methylbenzoate (4k)**

Prepared according to general procedure using 3-methylpyridine (20 uL, 0.2 mmol), ethyl 2-(diethoxyphosphoryl)acetate (80 uL, 2.0 equiv.) were used. Purification by column chromatography using pre-basified silica with pentane/EtOAc (50:1 v/v, Rf = 0.4) as eluent afforded **4k** as colorless oil (11.8 mg, 36% yield).

**<sup>1</sup>H NMR (400 MHz, CDCl<sub>3</sub>)** δ 7.91 – 7.78 (m, 2H), 7.41 – 7.28 (m, 2H), 4.37 (q, *J* = 7.1 Hz, 2H), 2.40 (d, *J* = 0.8 Hz, 3H), 1.39 (t, *J* = 7.1 Hz, 3H).

**<sup>13</sup>C NMR (101 MHz, CDCl<sub>3</sub>)** δ 166.8, 138.0, 133.5, 130.4, 130.0, 128.2, 126.6, 60.8, 21.2, 14.3.

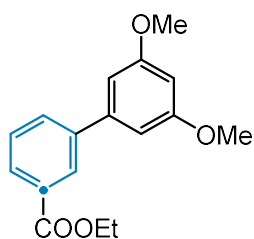

#### Ethyl 3',5'-dimethoxy-[1,1'-biphenyl]-3-carboxylate (**4l**)

Prepared according to general procedure using 3-(3,5-dimethoxyphenyl)pyridine (43.0 mg, 0.2 mmol), ethyl 2-(diethoxyphosphoryl)acetate (80 uL, 2.0 equiv.) were used. Purification by column chromatography using pre-basified silica with pentane/EtOAc (10:1 v/v, Rf = 0.4) as eluent afforded **4l** as colorless oil (17.3 mg, 30% yield).

<sup>1</sup>H NMR (400 MHz, CDCl<sub>3</sub>) δ 8.26 (s, 1H), 8.03 (dd, *J* = 7.7, 1.4 Hz, 1H), 7.80 – 7.71 (m, 1H), 7.50 (t, *J* = 7.7 Hz, 1H), 6.75 (d, *J* = 2.2 Hz, 2H), 6.50 (t, *J* = 2.2 Hz, 1H), 4.41 (q, *J* = 7.1 Hz, 2H), 3.86 (s, 6H), 1.42 (t, *J* = 7.1 Hz, 3H).

<sup>13</sup>C NMR (101 MHz, CDCl<sub>3</sub>) δ 166.5, 161.2, 142.4, 141.4, 131.5, 131.0, 128.7, 128.6, 128.2, 105.5, 99.6, 61.1, 55.5, 14.3.

HRMS (ESI): *m/z* calculated for [C<sub>17</sub>H<sub>18</sub>O<sub>4</sub>] [M+Na<sup>+</sup>]: 309.1097, found: 309.1096.

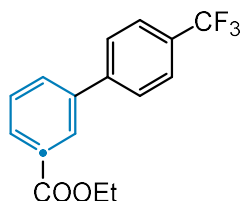

#### Ethyl 4'-(trifluoromethyl)-[1,1'-biphenyl]-3-carboxylate (**4m**)

Prepared according to general procedure using 3-(4-(trifluoromethyl)phenyl)pyridine (44.6 mg, 0.2 mmol), ethyl 2-(diethoxyphosphoryl)acetate (80 uL, 2.0 equiv.) were used. Purification by column chromatography using pre-basified silica with pentane/EtOAc (50:1 v/v, Rf = 0.4) as eluent afforded **4m** as colorless oil (29.3 mg, 50% yield).

<sup>1</sup>H NMR (400 MHz, CDCl<sub>3</sub>) δ 8.28 (t, *J* = 1.9 Hz, 1H), 8.09 (dt, *J* = 7.8, 1.4 Hz, 1H), 7.78 (ddd, *J* = 7.7, 2.0, 1.1 Hz, 1H), 7.72 (s, 4H), 7.55 (t, *J* = 7.8 Hz, 1H), 4.43 (q, *J* = 7.1 Hz, 2H), 1.43 (t, *J* = 7.1 Hz, 3H).

<sup>13</sup>C NMR (101 MHz, CDCl<sub>3</sub>) δ 166.3, 143.7, 140.0, 131.5, 131.3, 129.8 (q, *J* = 32.7 Hz), 129.2, 129.0, 128.3, 127.5, 125.8 (q, *J* = 3.7 Hz), 124.1 (q, *J* = 271.9 Hz), 61.2, 14.3.

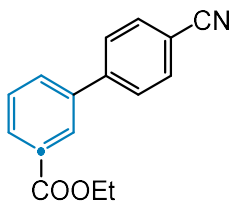

**Ethyl 4'-cyano-[1,1'-biphenyl]-3-carboxylate (4n)**

Prepared according to general procedure using 4-(pyridin-3-yl)benzotrile (36.0 mg, 0.2 mmol), ethyl 2-(diethoxyphosphoryl)acetate (80 uL, 2.0 equiv.) were used. Purification by column chromatography using pre-basified silica with pentane/EtOAc (5:1 v/v,  $R_f = 0.3$ ) as eluent afforded **4n** as colorless oil (25.2 mg, 50% yield).

$^1\text{H NMR}$  (400 MHz,  $\text{CDCl}_3$ )  $\delta$  8.29 – 8.25 (m, 1H), 8.10 (dt,  $J = 7.8, 1.4$  Hz, 1H), 7.80 – 7.69 (m, 5H), 7.56 (td,  $J = 7.8, 0.5$  Hz, 1H), 4.42 (q,  $J = 7.1$  Hz, 2H), 1.42 (t,  $J = 7.1$  Hz, 3H).

$^{13}\text{C NMR}$  (101 MHz,  $\text{CDCl}_3$ )  $\delta$  166.1, 144.6, 139.4, 132.7, 131.4, 131.4, 129.6, 129.2, 128.3, 127.8, 118.7, 111.4, 61.3, 14.3.

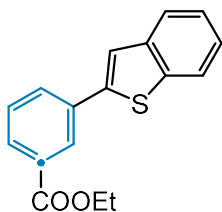

**Ethyl 3-(benzo[b]thiophen-2-yl)benzoate (4o)**

Prepared according to general procedure using 3-(benzo[b]thiophen-2-yl)pyridine (42.2 mg, 0.2 mmol), ethyl 2-(diethoxyphosphoryl)acetate (80 uL, 2.0 equiv.) were used. Purification by column chromatography using pre-basified silica with pentane/EtOAc (20:1 v/v,  $R_f = 0.3$ ) as eluent afforded **4o** as white solid (25.2 mg, 45% yield).

$^1\text{H NMR}$  (400 MHz,  $\text{CDCl}_3$ )  $\delta$  8.40 (s, 1H), 8.02 (dd,  $J = 7.9, 1.3$  Hz, 1H), 7.91 – 7.83 (m, 2H), 7.82 – 7.77 (m, 1H), 7.63 (s, 1H), 7.50 (t,  $J = 7.8$  Hz, 1H), 7.40 – 7.31 (m, 2H), 4.44 (q,  $J = 7.1$  Hz, 2H), 1.44 (t,  $J = 7.1$  Hz, 3H).

$^{13}\text{C NMR}$  (101 MHz,  $\text{CDCl}_3$ )  $\delta$  166.2, 143.0, 140.5, 139.6, 134.6, 131.3, 130.6, 129.1, 129.0, 127.4, 124.6, 124.6, 123.7, 122.3, 120.2, 61.2, 14.3.

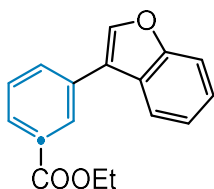

**Ethyl 3-(benzofuran-3-yl)benzoate (4p)**

Prepared according to general procedure using 3-(benzofuran-3-yl)pyridine (39.0 mg, 0.2 mmol), ethyl 2-(diethoxyphosphoryl)acetate (80 uL, 2.0 equiv.) were used. Purification by column chromatography using pre-basified silica with pentane/EtOAc (20:1 v/v, Rf = 0.4) as eluent afforded **4p** as colorless oil (23.7 mg, 45% yield).

**<sup>1</sup>H NMR (400 MHz, CDCl<sub>3</sub>)** δ 8.34 (td, *J* = 1.8, 0.5 Hz, 1H), 8.05 (dt, *J* = 7.9, 1.4 Hz, 1H), 7.88 – 7.82 (m, 3H), 7.60 – 7.52 (m, 2H), 7.42 – 7.32 (m, 2H), 4.43 (q, *J* = 7.1 Hz, 2H), 1.43 (t, *J* = 7.1 Hz, 3H).

**<sup>13</sup>C NMR (101 MHz, CDCl<sub>3</sub>)** δ 166.4, 155.8, 141.7, 132.4, 131.6, 131.3, 129.0, 128.5, 126.2, 124.7, 123.2, 121.5, 120.2, 111.8, 61.1, 14.3.

**HRMS (ESI):** m/z calculated for [C<sub>17</sub>H<sub>14</sub>O<sub>3</sub>] [M+Na<sup>+</sup>]: 289.0835, found: 289.0833.

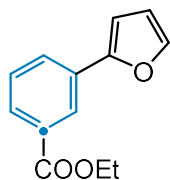

#### Ethyl 3-(furan-2-yl)benzoate (**4q**)

Prepared according to general procedure using 3-(furan-2-yl)pyridine (29.0 mg, 0.2 mmol), ethyl 2-(diethoxyphosphoryl)acetate (80 uL, 2.0 equiv.) were used. Purification by column chromatography using pre-basified silica with pentane/EtOAc (20:1 v/v, Rf = 0.4) as eluent afforded **4q** as colorless oil (17.1 mg, 40% yield).

**<sup>1</sup>H NMR (400 MHz, CDCl<sub>3</sub>)** δ 8.33 (t, *J* = 1.8 Hz, 1H), 7.93 (dt, *J* = 7.8, 1.5 Hz, 1H), 7.85 (dt, *J* = 7.8, 1.5 Hz, 1H), 7.50 (dd, *J* = 1.8, 0.8 Hz, 1H), 7.46 (t, *J* = 7.8 Hz, 1H), 6.74 (dd, *J* = 3.4, 0.8 Hz, 1H), 6.50 (dd, *J* = 3.4, 1.8 Hz, 1H), 4.41 (q, *J* = 7.1 Hz, 2H), 1.42 (t, *J* = 7.1 Hz, 3H).

**<sup>13</sup>C NMR (101 MHz, CDCl<sub>3</sub>)** δ 166.4, 153.0, 142.5, 132.9, 131.1, 128.7, 128.2, 127.8, 124.9, 111.8, 105.8, 61.1, 14.3.

**HRMS (ESI):** m/z calculated for [C<sub>13</sub>H<sub>12</sub>O<sub>3</sub>] [M+Na<sup>+</sup>]: 239.0679, found: 239.0677.

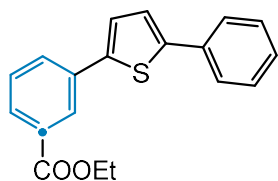

#### Ethyl 3-(5-phenylthiophen-2-yl)benzoate (**4r**)

Prepared according to general procedure using 3-(5-phenylthiophen-2-yl)pyridine (47.4 mg, 0.2 mmol), ethyl 2-(diethoxyphosphoryl)acetate (80 uL, 2.0 equiv.) were used. Purification by column chromatography using pre-basified silica with pentane/EtOAc (20:1 v/v, Rf = 0.4) as eluent afforded **4r** as colorless oil (26.3 mg, 43% yield).

**<sup>1</sup>H NMR (400 MHz, CDCl<sub>3</sub>)** δ 8.34 – 8.28 (m, 1H), 7.96 (dt, *J* = 7.9, 1.4 Hz, 1H), 7.80 (ddd, *J* = 7.8, 2.0, 1.1 Hz, 1H), 7.67 – 7.62 (m, 2H), 7.46 (td, *J* = 7.8, 0.5 Hz, 1H), 7.43 – 7.35 (m, 3H), 7.33 – 7.28 (m, 2H), 4.43 (q, *J* = 7.1 Hz, 2H), 1.43 (t, *J* = 7.1 Hz, 3H).

**<sup>13</sup>C NMR (101 MHz, CDCl<sub>3</sub>)** δ 166.3, 144.3, 142.3, 134.6, 134.1, 131.2, 129.7, 128.9, 128.3, 127.7, 126.5, 125.7, 124.7, 124.1, 61.2, 14.3.

**HRMS (ESI):** *m/z* calculated for [C<sub>19</sub>H<sub>16</sub>O<sub>2</sub>S] [M+Na<sup>+</sup>]: 331.0763, found: 331.0762.

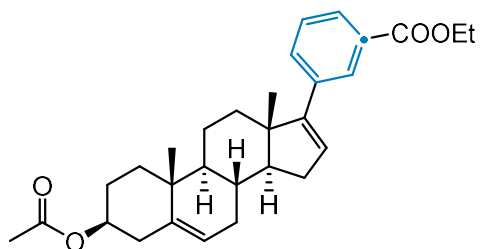

**Ethyl 3-((3S,8R,9S,10R,13S,14S)-3-acetoxy-10,13-dimethyl-2,3,4,7,8,9,10,11,12,13,14,15-dodecahydro-1H-cyclopenta[a]phenanthren-17-yl)benzoate (4s)**

Prepared according to general procedure using abiraterone acetate (78.2 mg, 0.2 mmol), dimethyl (2-oxopropyl)phosphonate (55 uL, 2.0 equiv.) were used. Purification by column chromatography using pre-basified silica with pentane/EtOAc (10:1 v/v, R<sub>f</sub> = 0.3) as eluent afforded **4s** as white solid (51.0 mg, 55% yield).

**<sup>1</sup>H NMR (400 MHz, CDCl<sub>3</sub>)** δ 8.16 (d, *J* = 15.8 Hz, 1H), 7.33 (d, *J* = 7.8 Hz, 1H), 7.23 (d, *J* = 7.2 Hz, 1H), 7.12 (t, *J* = 7.6 Hz, 1H), 6.29 (d, *J* = 15.8 Hz, 1H), 5.42 (d, *J* = 4.9 Hz, 1H), 4.62 (ddd, *J* = 11.5, 8.5, 3.5 Hz, 1H), 4.26 (q, *J* = 7.1 Hz, 2H), 2.74 (dd, *J* = 14.7, 6.4 Hz, 1H), 2.56 – 2.47 (m, 2H), 2.40 – 2.32 (m, 2H), 2.13 – 2.07 (m, 1H), 2.04 (s, 3H), 1.92 – 1.86 (m, 2H), 1.81 – 1.62 (m, 7H), 1.34 (t, *J* = 7.1 Hz, 3H), 1.18 – 1.11 (m, 2H), 1.10 (s, 3H), 1.06 (s, 3H).

**<sup>13</sup>C NMR (101 MHz, CDCl<sub>3</sub>)** δ 170.5, 167.1, 152.7, 143.8, 142.6, 140.0, 130.5, 126.6, 126.4, 124.4, 122.1, 119.0, 73.8, 60.4, 57.0, 50.0, 47.0, 38.1, 37.1, 36.8, 36.7, 32.3, 31.6, 30.7, 27.7, 21.4, 21.0, 19.3, 17.7, 14.3.

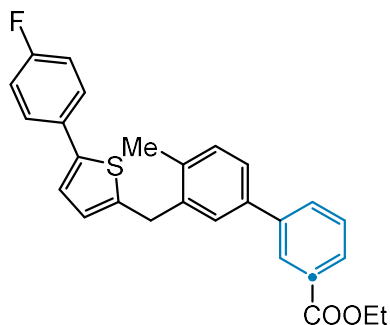

**Ethyl 3'-((5-(4-fluorophenyl)thiophen-2-yl)methyl)-4'-methyl-[1,1'-biphenyl]-3-carboxylate (4t)**

Prepared according to general procedure using 3-(3-((5-(4-fluorophenyl)thiophen-2-yl)methyl)-4-methylphenyl)pyridine (71.8 mg, 0.2 mmol), dimethyl (2-oxopropyl)phosphonate (55 uL, 2.0 equiv.)



were used. Purification by column chromatography using pre-basified silica with pentane/EtOAc (20:1 v/v, Rf = 0.3) as eluent afforded **4t** as colorless oil (30.1 mg, 42% yield).

**<sup>1</sup>H NMR (400 MHz, CDCl<sub>3</sub>)** δ 8.27 (t, *J* = 1.8 Hz, 1H), 8.00 (dt, *J* = 7.7, 1.4 Hz, 1H), 7.77 (ddd, *J* = 7.7, 1.9, 1.2 Hz, 1H), 7.52 – 7.43 (m, 5H), 7.28 (d, *J* = 7.9 Hz, 1H), 7.06 – 6.97 (m, 3H), 6.73 – 6.68 (m, 1H), 4.40 (q, *J* = 7.1 Hz, 2H), 4.21 (s, 2H), 2.38 (s, 3H), 1.40 (t, *J* = 7.1 Hz, 3H).

**<sup>13</sup>C NMR (101 MHz, CDCl<sub>3</sub>)** δ 166.6, 162.1 (d, *J* = 246.7 Hz), 143.2, 141.6, 141.2, 138.7, 138.1, 136.1, 131.3, 131.1, 131.0, 130.8 (d, *J* = 3.4 Hz), 128.8, 128.3, 128.1, 128.0, 127.1 (d, *J* = 8.0 Hz), 126.0, 125.7, 122.7, 115.7 (d, *J* = 21.8 Hz), 61.1, 34.3, 19.2, 14.3.

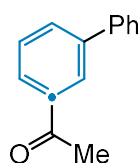

#### 1-([1,1'-Biphenyl]-3-yl)ethan-1-one (**5a**)

Prepared according to general procedure using 3-phenylpyridine (29 uL, 0.2 mmol), dimethyl (2-oxopropyl)phosphonate (55 uL, 2.0 equiv.) were used. Purification by column chromatography using pre-basified silica with pentane/EtOAc (50:1 v/v, Rf = 0.4) as eluent afforded **5a** as yellow oil (17.4 mg, 44% yield).

**<sup>1</sup>H NMR (400 MHz, CDCl<sub>3</sub>)** δ 8.19 (td, *J* = 1.9, 0.5 Hz, 1H), 7.94 (ddd, *J* = 7.8, 1.8, 1.1 Hz, 1H), 7.80 (ddd, *J* = 7.7, 1.9, 1.1 Hz, 1H), 7.65 – 7.59 (m, 2H), 7.54 (td, *J* = 7.7, 0.6 Hz, 1H), 7.51 – 7.43 (m, 2H), 7.42 – 7.36 (m, 1H), 2.66 (s, 3H).

**<sup>13</sup>C NMR (101 MHz, CDCl<sub>3</sub>)** δ 198.1, 141.7, 140.2, 137.6, 131.7, 129.0, 128.9, 127.8, 127.2, 127.2, 127.0, 26.7.

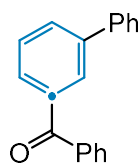

#### [1,1'-Biphenyl]-3-yl(phenyl)methanone (**5b**)

Prepared according to general procedure using 3-phenylpyridine (29 uL, 0.2 mmol), diethyl (2-oxo-2-phenylethyl)phosphonate (87 uL, 2.0 equiv.) were used. Purification by column chromatography using pre-basified silica with pentane/EtOAc (50:1 v/v, Rf = 0.4) as eluent afforded **5b** as colorless oil (20.8 mg, 40% yield).

**<sup>1</sup>H NMR (400 MHz, CDCl<sub>3</sub>)** δ 8.06 – 8.01 (m, 1H), 7.90 – 7.84 (m, 2H), 7.82 (ddd, *J* = 7.7, 1.9, 1.2 Hz, 1H), 7.77 (dt, *J* = 7.8, 1.4 Hz, 1H), 7.61 (ddt, *J* = 8.2, 6.7, 1.4 Hz, 3H), 7.56 (t, *J* = 7.7 Hz, 1H), 7.53 – 7.44 (m, 4H), 7.41 – 7.36 (m, 1H).

<sup>13</sup>C NMR (101 MHz, CDCl<sub>3</sub>) δ 196.7, 141.4, 140.2, 138.2, 137.6, 132.5, 131.0, 130.1, 128.9, 128.7, 128.6, 128.3, 127.8, 127.2.

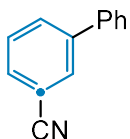

#### [1,1'-Biphenyl]-3-carbonitrile (**5c**)

Prepared according to general procedure using 3-phenylpyridine (29 uL, 0.2 mmol), diethyl (cyanomethyl)phosphonate (65 uL, 2.0 equiv.) were used. Purification by column chromatography using pre-basified silica with pentane/EtOAc (50:1 v/v, R<sub>f</sub> = 0.4) as eluent afforded **5c** as yellow oil (22.1 mg, 62% yield).

<sup>1</sup>H NMR (400 MHz, CDCl<sub>3</sub>) δ 7.89 – 7.84 (m, 1H), 7.82 (ddd, *J* = 7.9, 1.9, 1.3 Hz, 1H), 7.63 (dt, *J* = 7.7, 1.4 Hz, 1H), 7.59 – 7.52 (m, 3H), 7.48 (ddd, *J* = 8.2, 7.0, 1.0 Hz, 2H), 7.45 – 7.39 (m, 1H).

<sup>13</sup>C NMR (101 MHz, CDCl<sub>3</sub>) δ 142.4, 138.9, 131.5, 130.7, 130.7, 129.6, 129.1, 128.4, 127.1, 118.8, 112.9.

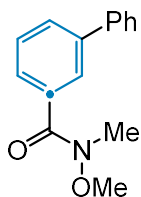

#### *N*-Methoxy-*N*-methyl-[1,1'-biphenyl]-3-carboxamide (**5d**)

Prepared according to general procedure using 3-phenylpyridine (29 uL, 0.2 mmol), diethyl (2-(methoxy(methyl)amino)-2-oxoethyl)phosphonate (82 uL, 2.0 equiv.) were used. Purification by column chromatography using pre-basified silica with pentane/EtOAc (2:1 v/v, R<sub>f</sub> = 0.4) as eluent afforded **5d** as yellow oil (26.8 mg, 56% yield).

<sup>1</sup>H NMR (400 MHz, CDCl<sub>3</sub>) δ 7.90 (t, *J* = 1.8 Hz, 1H), 7.69 (ddd, *J* = 7.7, 1.9, 1.2 Hz, 1H), 7.66 – 7.58 (m, 3H), 7.51 – 7.43 (m, 3H), 7.39 – 7.33 (m, 1H), 3.59 (s, 3H), 3.39 (s, 3H).

<sup>13</sup>C NMR (101 MHz, CDCl<sub>3</sub>) δ 169.9, 141.0, 140.4, 134.7, 129.2, 128.8, 128.5, 127.6, 127.1, 126.9, 126.9, 61.1, 33.8.

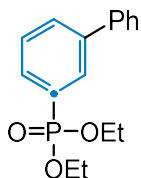

#### Diethyl [1,1'-biphenyl]-3-ylphosphonate (**5e**)

Prepared according to general procedure using 3-phenylpyridine (29 uL, 0.2 mmol), tetraethyl methylenebis(phosphonate) (99 uL, 2.0 equiv.) were used. Purification by column chromatography

using pre-basified silica with EtOAc ( $R_f = 0.4$ ) as eluent afforded **5e** as yellow oil (22.0 mg, 38% yield).

$^1\text{H NMR}$  (400 MHz,  $\text{CDCl}_3$ )  $\delta$  8.04 (dt,  $J = 14.2, 1.8$  Hz, 1H), 7.83 – 7.75 (m, 2H), 7.63 – 7.58 (m, 2H), 7.54 (td,  $J = 7.7, 4.4$  Hz, 1H), 7.49 – 7.42 (m, 2H), 7.40 – 7.36 (m, 1H), 4.25 – 4.06 (m, 4H), 1.34 (t,  $J = 7.1$  Hz, 6H).

$^{13}\text{C NMR}$  (101 MHz,  $\text{CDCl}_3$ )  $\delta$  141.5 (d,  $J = 15.0$  Hz), 140.0, 140.0, 131.0 (d,  $J = 3.2$  Hz), 130.5 (d,  $J = 5.9$  Hz), 130.4 (d,  $J = 6.8$  Hz), 128.9 (d,  $J = 15.7$  Hz), 128.9, 127.8, 127.2, 62.2, 62.1, 16.4, 16.3.

$^{31}\text{P NMR}$  (162 MHz,  $\text{CDCl}_3$ )  $\delta$  18.71.

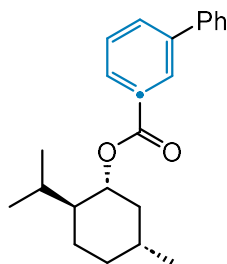

**(1R,2S,5R)-2-Isopropyl-5-methylcyclohexyl [1,1'-biphenyl]-3-carboxylate (5f)**

Prepared according to general procedure using 3-phenylpyridine (29  $\mu\text{L}$ , 0.2 mmol), (1R,2S,5R)-2-isopropyl-5-methylcyclohexyl 2-(diethoxyphosphoryl)acetate (133.6 mg, 2.0 equiv.) were used. Purification by column chromatography using pre-basified silica with pentane/EtOAc (50:1 v/v,  $R_f = 0.4$ ) as eluent afforded **5f** as colorless oil (31.2 mg, 47% yield).

$^1\text{H NMR}$  (400 MHz,  $\text{CDCl}_3$ )  $\delta$  8.28 (t,  $J = 1.8$  Hz, 1H), 8.04 (dt,  $J = 7.8, 1.4$  Hz, 1H), 7.78 (ddd,  $J = 7.7, 2.0, 1.2$  Hz, 1H), 7.66 – 7.61 (m, 2H), 7.54 – 7.45 (m, 3H), 7.42 – 7.37 (m, 1H), 4.99 (td,  $J = 10.9, 4.4$  Hz, 1H), 2.15 (dtd,  $J = 12.0, 4.0, 1.7$  Hz, 1H), 1.98 (ddt,  $J = 14.0, 7.0, 3.5$  Hz, 1H), 1.78 – 1.71 (m, 2H), 1.62 – 1.55 (m, 2H), 1.19 – 1.08 (m, 2H), 0.94 (dd,  $J = 6.8, 5.5$  Hz, 7H), 0.82 (d,  $J = 6.9$  Hz, 3H).

$^{13}\text{C NMR}$  (101 MHz,  $\text{CDCl}_3$ )  $\delta$  166.0, 141.5, 140.3, 131.4, 131.4, 128.9, 128.8, 128.3, 128.2, 127.7, 127.2, 75.0, 47.3, 41.0, 34.3, 31.5, 26.5, 23.7, 22.0, 20.8, 16.6.

## 4. Limitations

### 4.1 limitation of pyridines

#### i) No imine or low-yielding imine formation

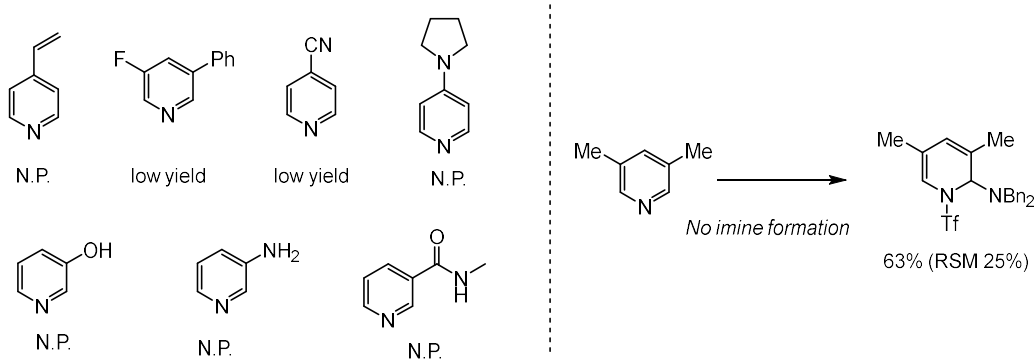

#### ii) Problematic hydrolysis step

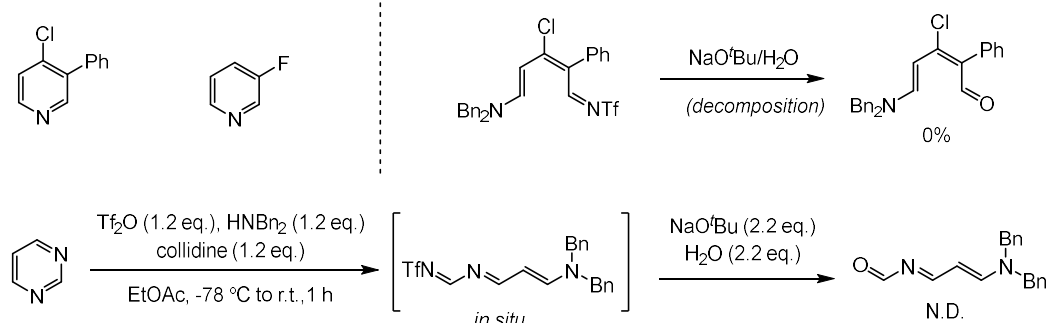

#### iii) Low yielding alkene formation during olefination step

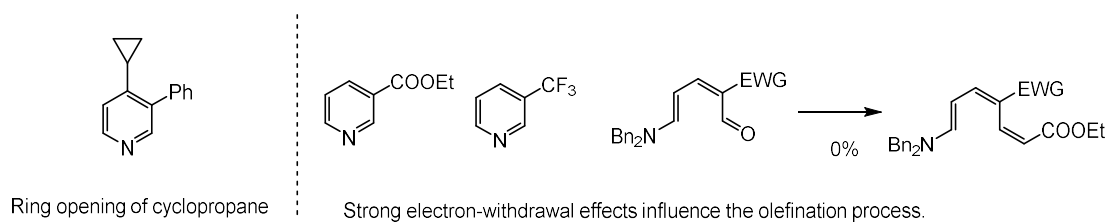

#### iv) Problematic ring closure step

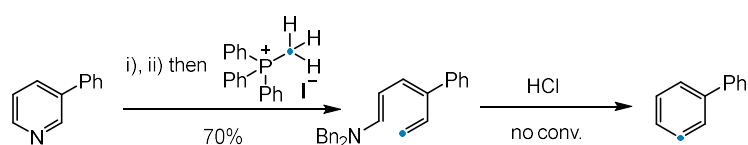

## 4.2 limitation of phosphine reagents

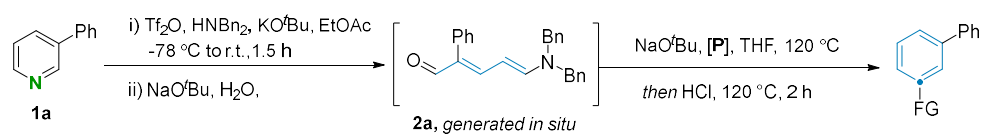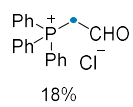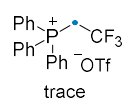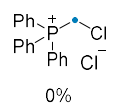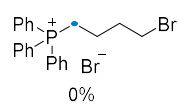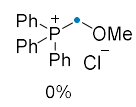

## 5. X-Ray analysis

**X-Ray diffraction:** Data sets for compound **2a** were collected with a Bruker D8 Venture Photon III Diffractometer. Programs used: data collection: *APEX4* Version 2021.4-0<sup>1</sup> (Bruker AXS Inc., **2021**); cell refinement: *SAINT* Version 8.40B (Bruker AXS Inc., **2021**); data reduction: *SAINT* Version 8.40B (Bruker AXS Inc., **2021**); absorption correction, *SADABS* Version 2016/2 (Bruker AXS Inc., **2021**); structure solution *SHELXT*-Version 2018-3<sup>2</sup> (Sheldrick, G. M. *Acta Cryst.*, **2015**, *A71*, 3-8); structure refinement *SHELXL*-Version 2018-3<sup>3</sup> (Sheldrick, G. M. *Acta Cryst.*, **2015**, *C71* (1), 3-8) and graphics, *XP*<sup>4</sup> (Version 5.1, Bruker AXS Inc., Madison, Wisconsin, USA, **1998**). *R*-values are given for observed reflections, and *wR*<sup>2</sup> values are given for all reflections.

**X-ray crystal structure analysis of 2a:** A orange-yellow, block-like specimen of C<sub>25</sub>H<sub>23</sub>NO, approximate dimensions 0.074 mm x 0.090 mm x 0.110 mm, was used for the X-ray crystallographic analysis. The X-ray intensity data were measured on a single crystal diffractometer Bruker D8 Venture Photon III system equipped with a micro focus tube Cu ImS (CuK $\alpha$ ,  $\lambda$  = 1.54178 Å) and a MX mirror monochromator. A total of 1432 frames were collected. The total exposure time was 22.40 hours. The frames were integrated with the Bruker SAINT software package using a wide-frame algorithm. The integration of the data using a monoclinic unit cell yielded a total of 29807 reflections to a maximum  $\theta$  angle of 66.68° (0.84 Å resolution), of which 3305 were independent (average redundancy 9.019, completeness = 99.4%, *R*<sub>int</sub> = 9.09%, *R*<sub>sig</sub> = 3.84%) and 2617 (79.18%) were greater than 2 $\sigma$ (*F*<sup>2</sup>). The final cell constants of *a* = 16.5300(3) Å, *b* = 5.94310(10) Å, *c* = 20.4998(4) Å,  $\beta$  = 110.4490(10)°, volume = 1886.98(6) Å<sup>3</sup>, are based upon the refinement of the XYZ-centroids of 8534 reflections above 20  $\sigma$ (*I*) with 5.948° < 2 $\theta$  < 132.7°. Data were corrected for absorption effects using the multi-scan method (SADABS). The ratio of minimum to maximum apparent transmission was 0.918. The calculated minimum and maximum transmission coefficients (based on crystal size) are 0.9390 and 0.9580. The structure was solved and refined using the Bruker SHELXTL Software Package, using the space group *P*<sub>21</sub>/*n*, with *Z* = 4 for the formula unit, C<sub>25</sub>H<sub>23</sub>NO. The final anisotropic full-matrix least-squares refinement on *F*<sup>2</sup> with 244 variables converged at *R*1 = 4.18%, for the observed data and *wR*2 = 10.30% for all data. The goodness-of-fit was 1.049. The largest peak in the

final difference electron density synthesis was  $0.247 \text{ e}^-/\text{\AA}^3$  and the largest hole was  $-0.181 \text{ e}^-/\text{\AA}^3$  with an RMS deviation of  $0.039 \text{ e}^-/\text{\AA}^3$ . On the basis of the final model, the calculated density was  $1.244 \text{ g/cm}^3$  and  $F(000)$ ,  $752 \text{ e}^-$ . CCDC Nr.: 2334460.

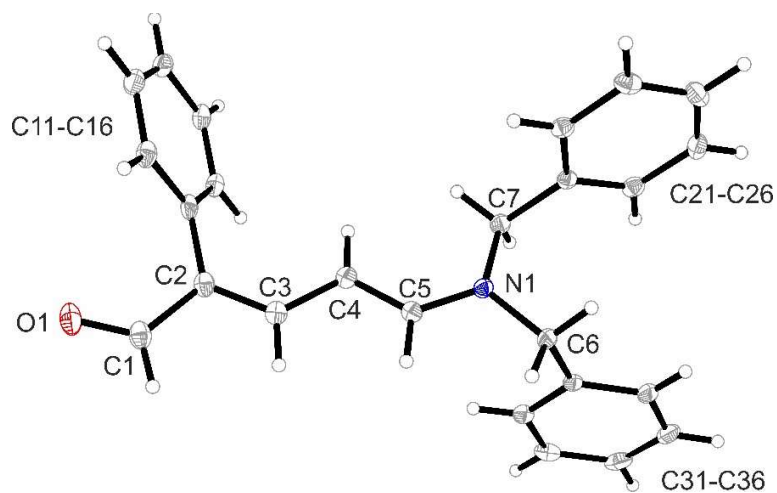

**Figure S1.** Crystal structure of compound **2a**. Thermal ellipsoids are shown at 30% probability.

## 6. DFT calculation

### Computational Details

All geometry optimizations of intermediates and transition states were achieved using spin-unrestricted UB3LYP<sup>5</sup>-D3<sup>6</sup>/def2-SVP<sup>7</sup> method, in tetrahydrofuran solvent using the CPCM solvent model<sup>8</sup> with “opt=noeigen” and “guess=mix” keywords as implemented in Gaussian16<sup>9</sup>. Frequency calculations were also conducted at the same level of theory to obtain vibrational frequencies to determine the identity of stationary points as intermediates (no imaginary frequencies) or transition states (only one imaginary frequency), as well as obtaining the thermochemistry: enthalpy ( $\Delta H$ ) and free energy ( $\Delta G$ ) at the temperature of 298 K. Single point energy calculations were done using the following methods:

UB3LYP-D3/def2TZVPP-CPCM(THF)//UB3LYP-D3/def2svp-CPCM(THF)

UB3LYP-D3/aug-CC-PVTZ-CPCM(THF)//UB3LYP-D3/def2svp-CPCM(THF)

UPBEPBE-D3/aug-CC-PVTZ-CPCM(THF)//UB3LYP-D3/def2svp-CPCM(THF)

UM06/aug-CC-PVTZ-CPCM(THF)//UB3LYP-D3/def2svp-CPCM(THF).

Extensive conformational analysis was done for all key transition states and stationary points and the minimum energy structures were chosen for the minimum energy profiles. All structural figures were generated with CYLview.<sup>10</sup> Distances in structural figures are shown in Å and energies are in kcal/mol.

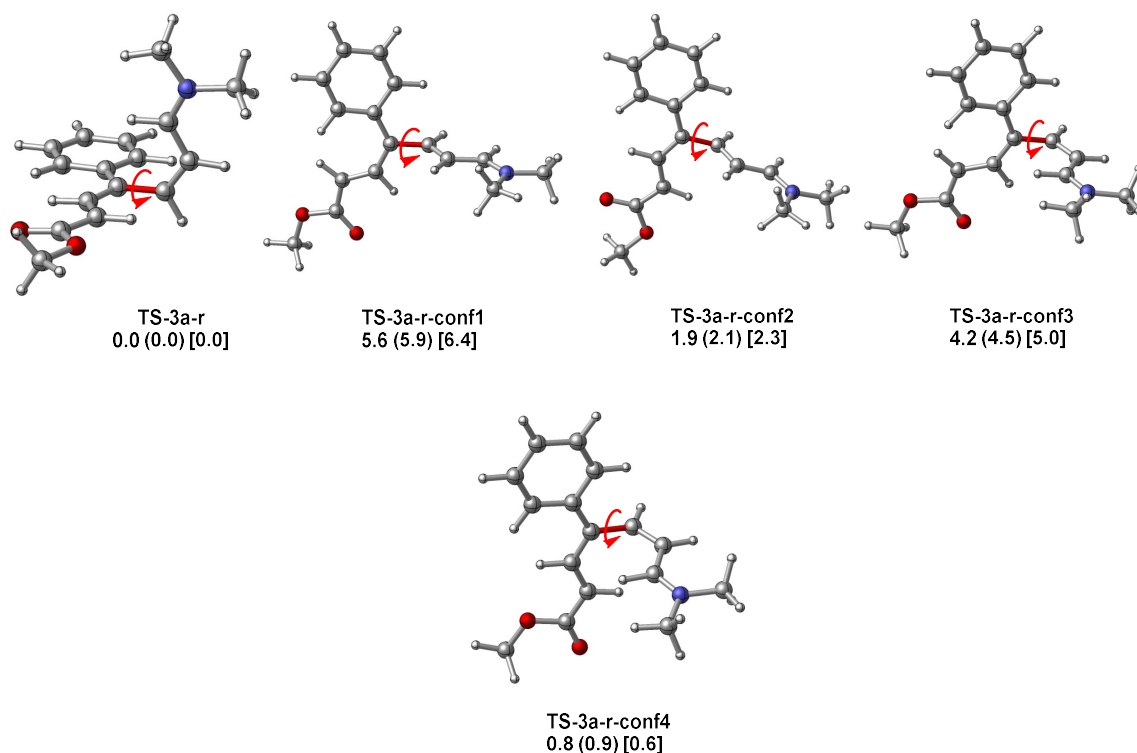

**Figure S2.** Different conformations for the  $C_7$ - $C_8$  rotation transition state for substrate **3a** calculated at the theoretical level: UB3LYP-d3/def2-svp-CPCM(THF). Calculated energies, enthalpy (parentheses) and free Gibbs energies [brackets] are given in kcal mol<sup>-1</sup>.



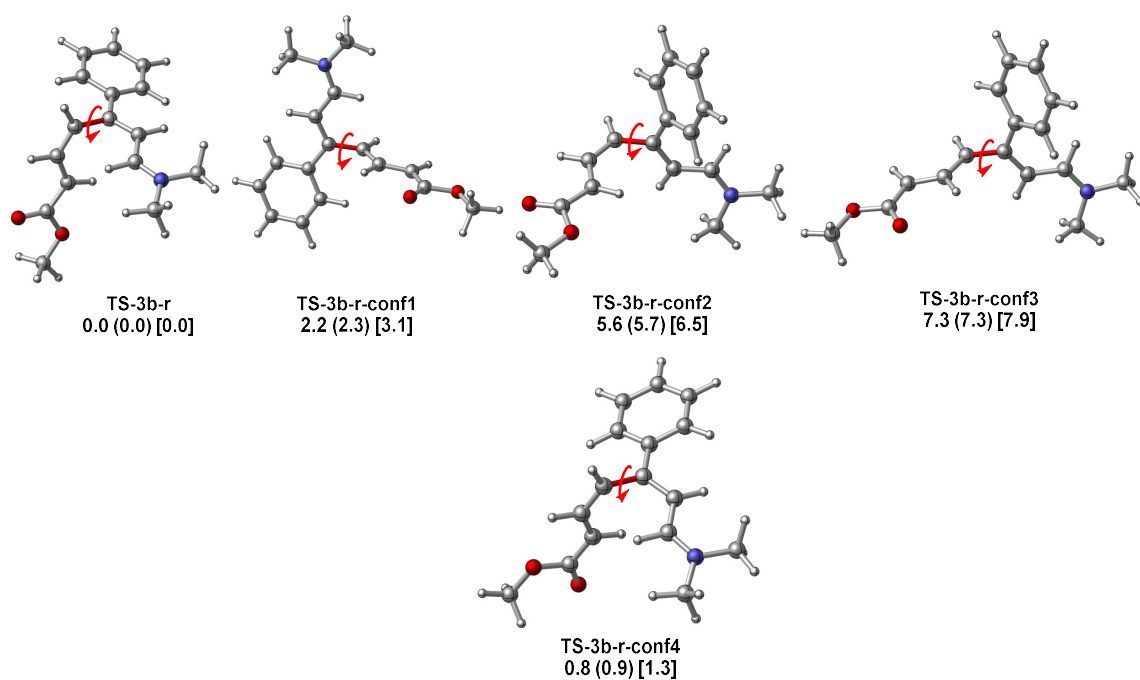

**Figure S3.** Different conformations for the  $C_7$ - $C_8$  rotation transition state for substrate **3b** calculated at the theoretical level: UB3LYP-d3/def2-svp-CPCM(THF). Calculated energies, enthalpy (parentheses) and free Gibbs energies [brackets] are given in kcal mol<sup>-1</sup>.

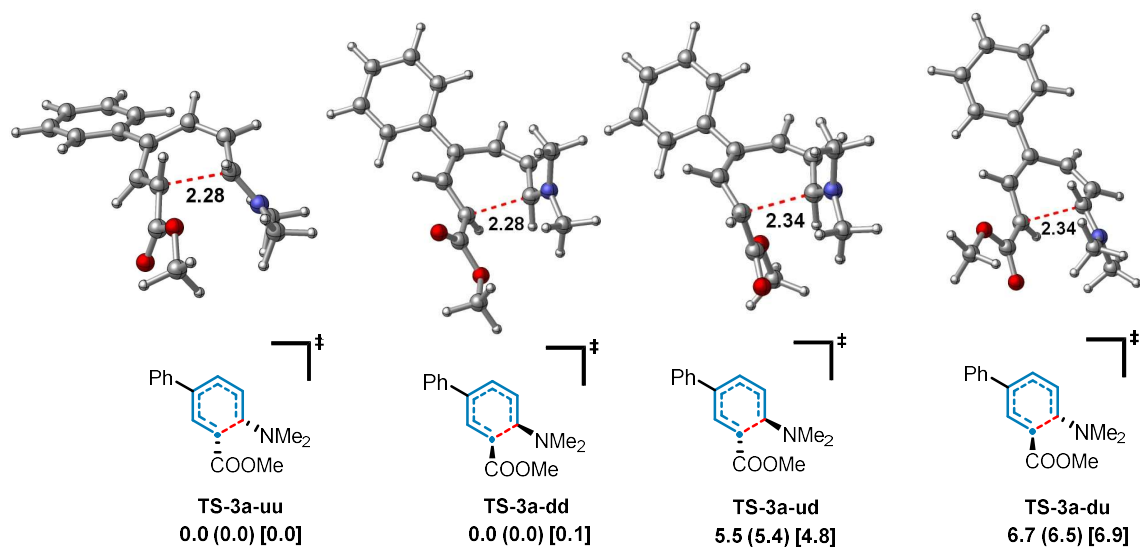

**Figure S4.** Different conformations for the electrocyclization transition state for substrate **3a** calculated at the theoretical level: UB3LYP-d3/def2-svp-CPCM(THF). Calculated energies, enthalpy (parentheses) and free Gibbs energies [brackets] are given in kcal mol<sup>-1</sup>.

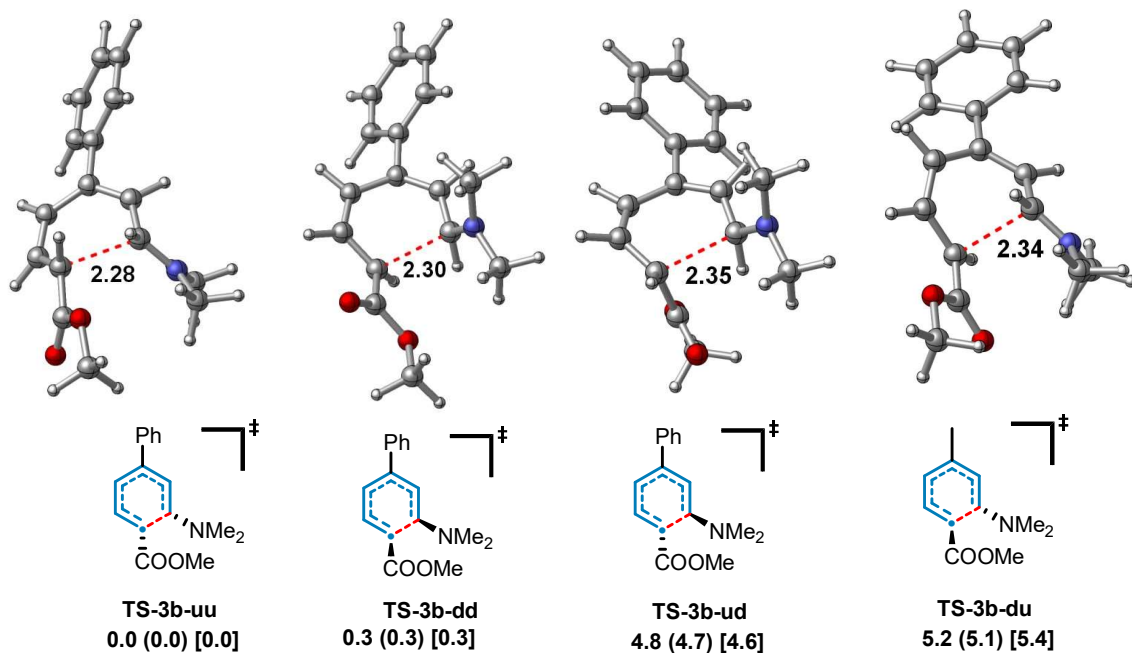

**Figure S5.** Different conformations for the electrocyclicization transition state for substrate **3b** calculated at the theoretical level: UB3LYP-d3/def2-svp-CPCM(THF). Calculated energies, enthalpy (parentheses) and free Gibbs energies [brackets] are given in kcal mol<sup>-1</sup>.

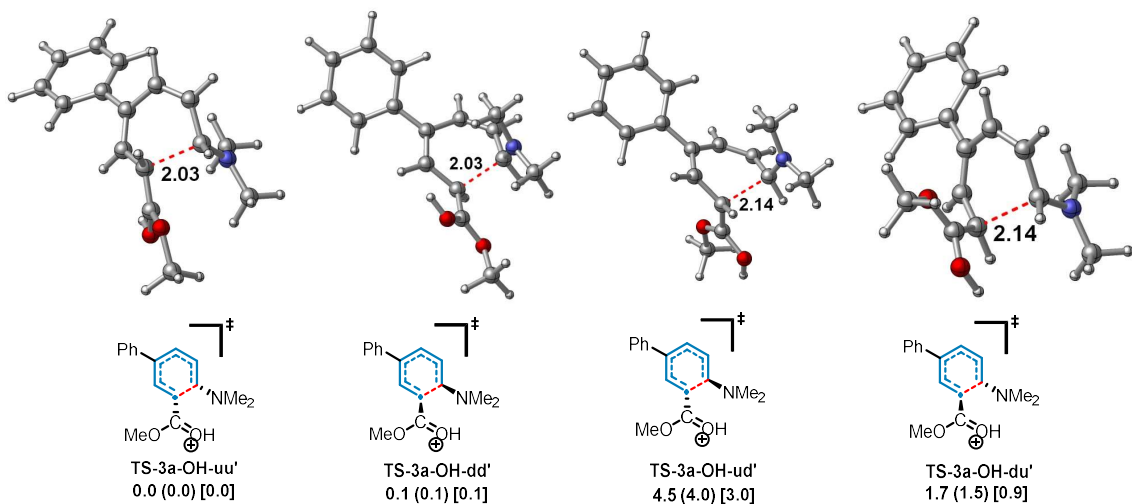

**Figure S6.** Different conformations for the electrocyclicization transition state for the protonated substrate **3a-OH** (without chloride as counter-ion) calculated at the theoretical level: UB3LYP-d3/def2-svp-CPCM(THF). Calculated energies, enthalpy (parentheses) and free Gibbs energies [brackets] are given in kcal mol<sup>-1</sup>.

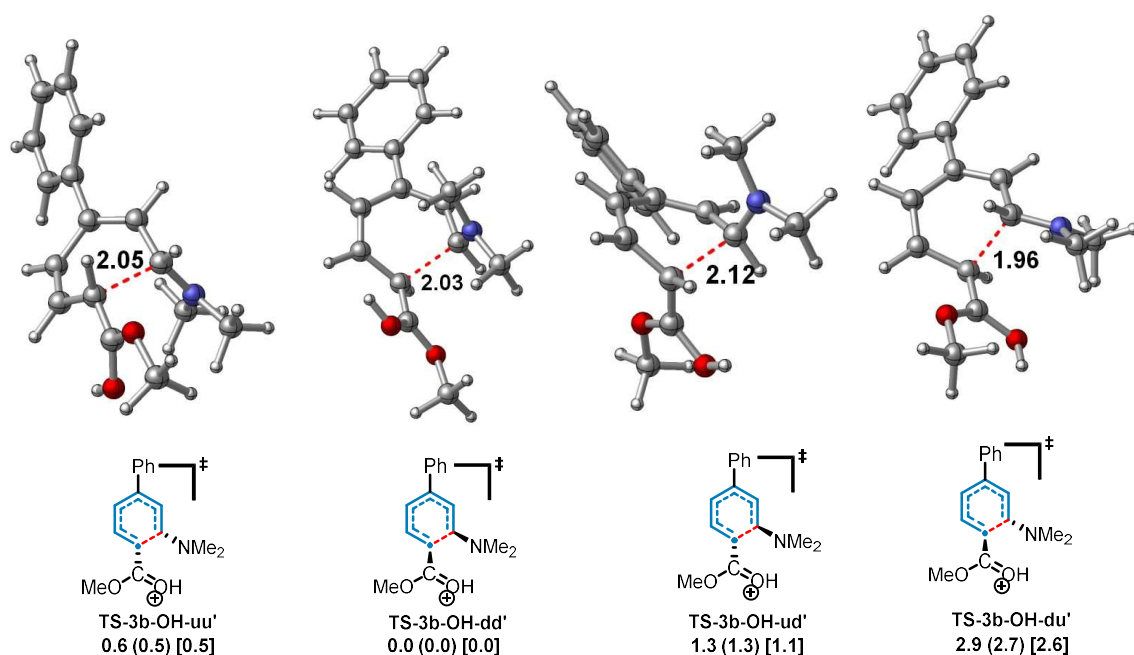

**Figure S7.** Different conformations for the electrocyclicization transition state for the protonated substrate **3b-OH** (without chloride as counter-ion) calculated at the theoretical level: UB3LYP-d3/def2-svp-CPCM(THF). Calculated energies, enthalpy (parentheses) and free Gibbs energies [brackets] are given in kcal mol<sup>-1</sup>.

UB3LYP-D3/aug-CC-PVTZ-CPCM(THF)//UB3LYP-D3/def2svp-CPCM(THF)  
 $\Delta E$  ( $\Delta H$ ) [ $\Delta G$ ] in kcal/mol

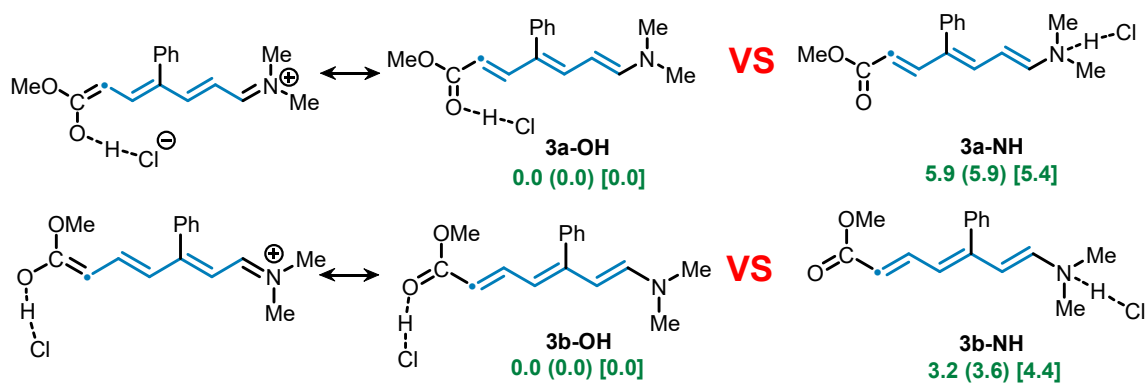

Stabilization of 3a-OH and 3b-OH over 3a-NH and 3b-NH due to extended delocalization

**Figure S8.** Energy preferences for protonation at the carbonyl oxygen over the nitrogen due to extended delocalization calculated at the theoretical level: UB3LYP-D3/aug-CC-PVTZ-CPCM(THF)//UB3LYP-d3/def2-svp-CPCM(THF). Calculated energies, enthalpy (parentheses) and free Gibbs energies [brackets] are given in kcal mol<sup>-1</sup>.

- Under acidic conditions, Carbonyl oxygen gets protonated rather than N.

- Thermodynamically, protonation of carbonyl O is favored over N.
- If carbonyl oxygen gets protonated, the positive charge can delocalize, and this also helps in lowering the barrier of rotation whereas that is not possible if N gets protonated.

UB3LYP-D3/def2svp-CPCM(THF)

UB3LYP-D3/def2TZVPP-CPCM(THF)//UB3LYP-D3/def2svp-CPCM(THF)

UB3LYP-D3/aug-CC-PVTZ-CPCM(THF)//UB3LYP-D3/def2svp-CPCM(THF)

UPBEPBE-D3/aug-CC-PVTZ-CPCM(THF)//UB3LYP-D3/def2svp-CPCM(THF)

UM06/aug-CC-PVTZ-CPCM(THF)//UB3LYP-D3/def2svp-CPCM(THF)

$\Delta E$  ( $\Delta H$ ) [ $\Delta G$ ] in kcal/mol

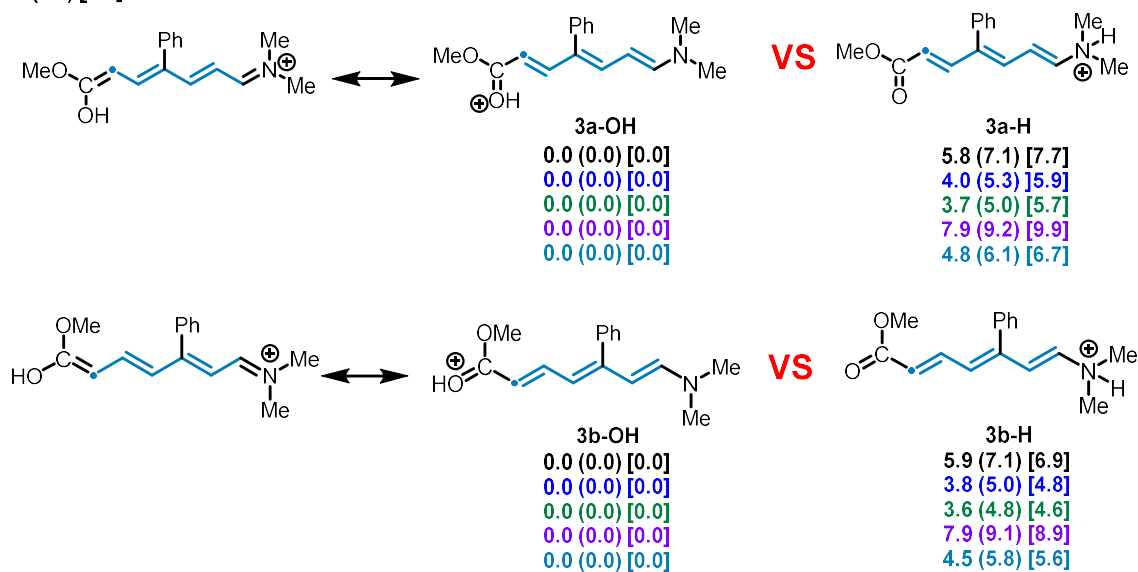

**Figure S9.** Energy preferences for protonation at the carbonyl oxygen over the nitrogen due to extended delocalization calculated at different methods without the chloride as counter-ion. Calculated energies, enthalpy (parentheses) and free Gibbs energies [brackets] are given in kcal mol<sup>-1</sup>.

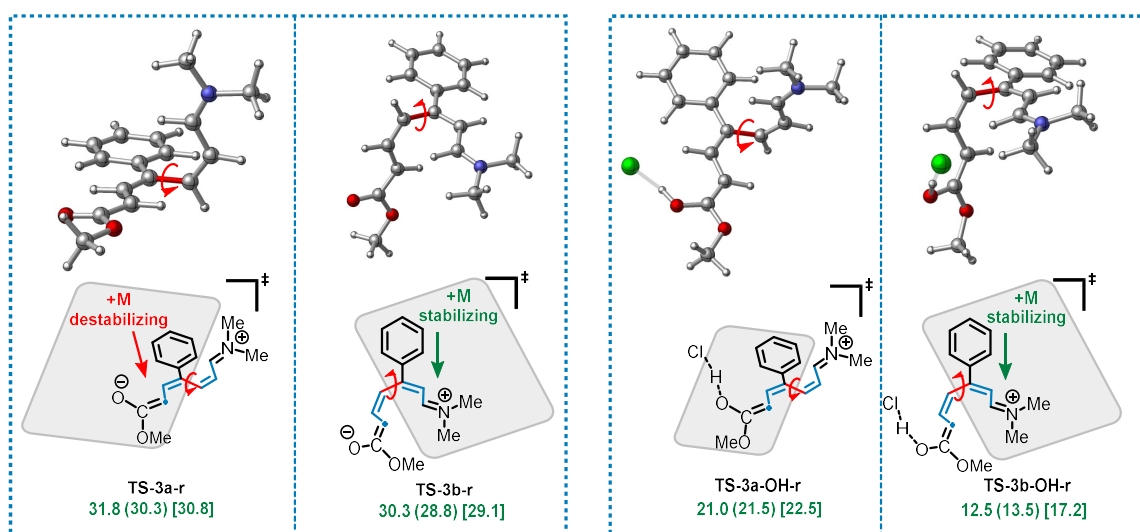

**Figure S10.** Key  $C_7$ - $C_8$  rotation transition states for substrates **3a** and **3b** under basic (left) and acidic (right) conditions, highlighting the effect of protonation in lowering the rotation barrier calculated at the theoretical level: UB3LYP-D3/aug-CC-PVTZ-CPCM(THF)//UB3LYP-d3/def2-svp-CPCM(THF). Calculated energies, enthalpy (parentheses) and free Gibbs energies [brackets] are given in kcal mol<sup>-1</sup>.

Under basic conditions, the barrier for double bond rotation for the 3-substituted substrate (**3a**) is around 1.7 kcal higher as compared to the 4-substituted substrate (**3b**) consistent with experiments. Under acidic conditions that barrier becomes much lower (below 20 kcal) presumably because of the resonance structure shown above in which the double bond in question has reduced  $\pi$ -bond character.

**TS-3b-r** has lower barrier because in that TS, the phenyl ring is in the same plane as the NMe<sub>2</sub> group thus stabilizing the positive charge on N via +M effect. The Opposite is true for **TS-3a-r** where phenyl ring destabilizes the negative charge on O.

UB3LYP-D3/def2svp-CPCM(THF)  
 UB3LYP-D3/def2TZVPP-CPCM(THF)//UB3LYP-D3/def2svp-CPCM(THF)  
 UB3LYP-D3/aug-CC-PVTZ-CPCM(THF)//UB3LYP-D3/def2svp-CPCM(THF)  
 UPBEPBE-D3/aug-CC-PVTZ-CPCM(THF)//UB3LYP-D3/def2svp-CPCM(THF)  
 UMO6/aug-CC-PVTZ-CPCM(THF)//UB3LYP-D3/def2svp-CPCM(THF)  
 $\Delta E$  ( $\Delta H$ ) [ $\Delta G$ ] in kcal/mol

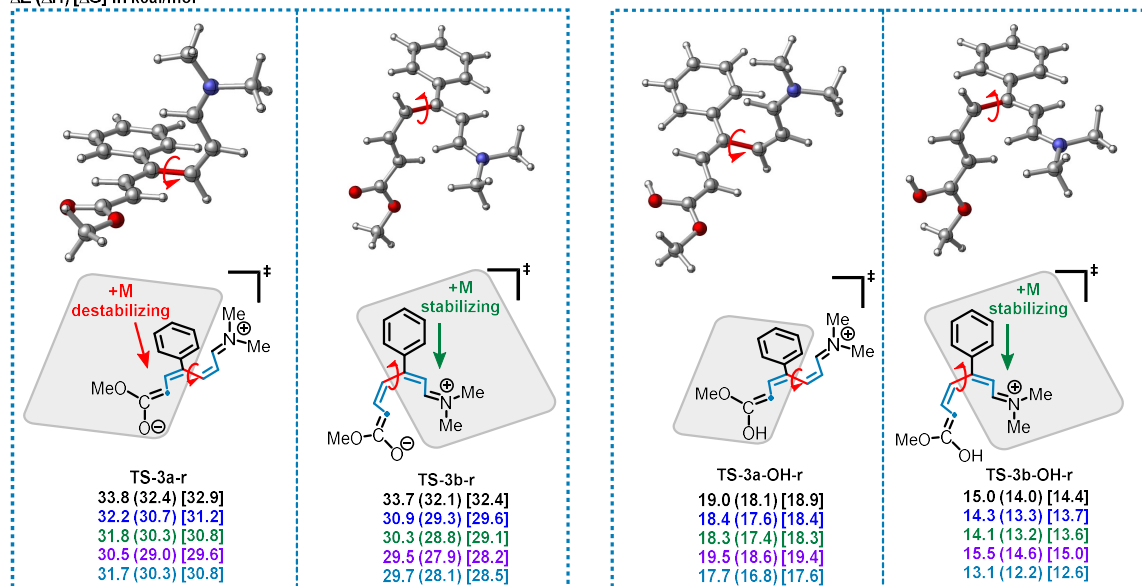

**Figure S11.** Key  $C_7$ - $C_8$  rotation transition states for substrates **3a** and **3b** under basic (left) and acidic (right) conditions without the chloride as counter-ion, highlighting the effect of protonation in lowering the rotation barrier calculated at different methods. Calculated energies, enthalpy (parentheses) and free Gibbs energies [brackets] are given in kcal mol<sup>-1</sup>.

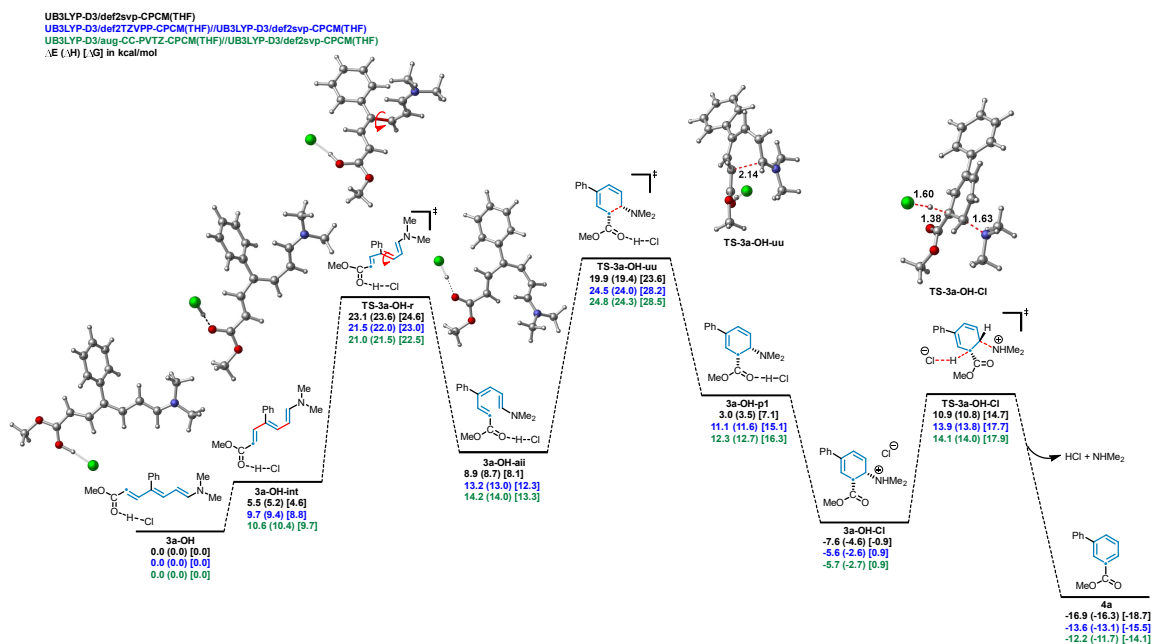

**Figure S12.** Full minimum energy pathway for substrate **3a** under acidic conditions calculated at different methods.

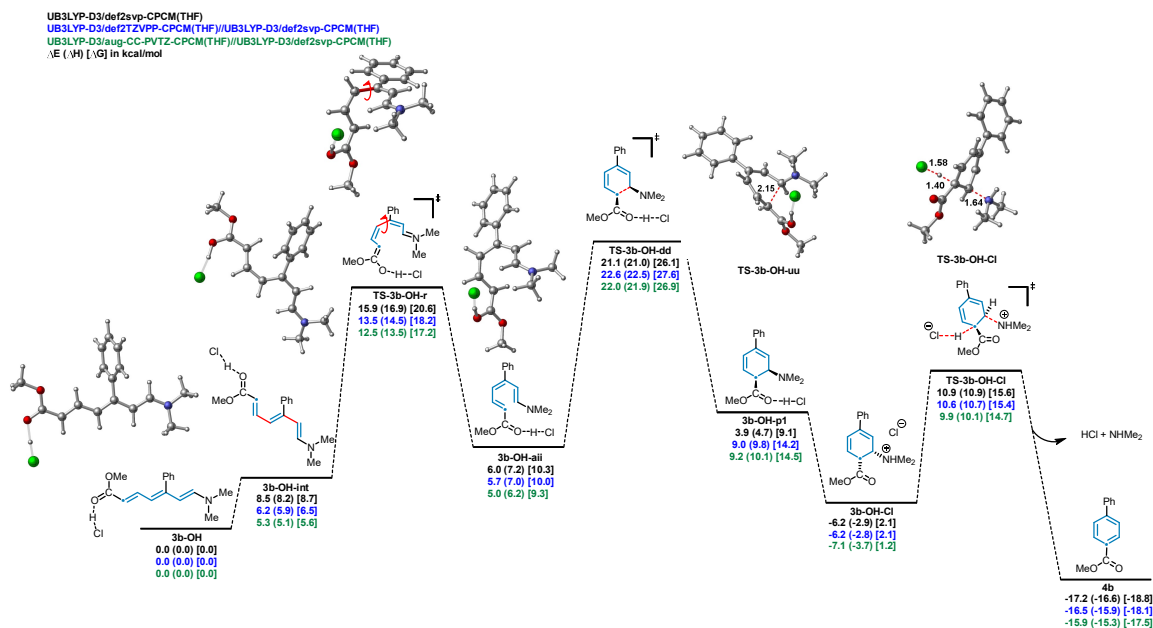

**Figure S13.** Full minimum energy pathway for substrate **3b** under acidic conditions calculated at different methods.

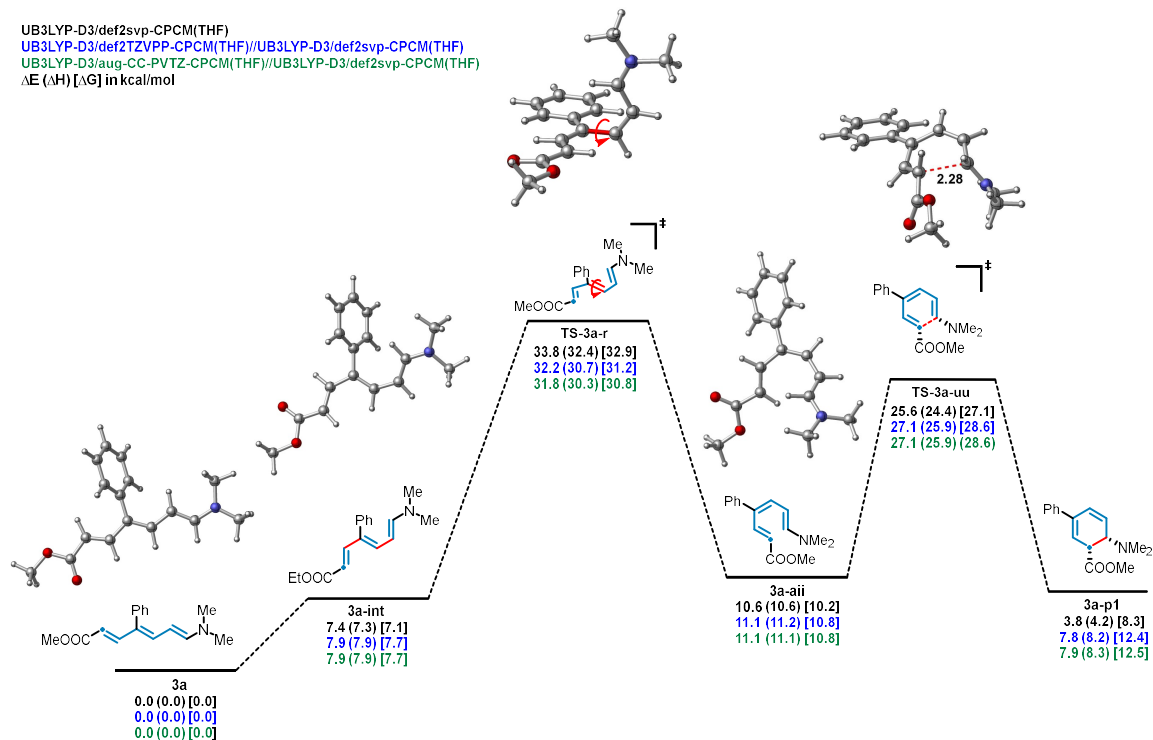

**Figure S14.** Minimum energy pathway for substrate **3a** under basic conditions till electrocyclization step calculated at different methods.

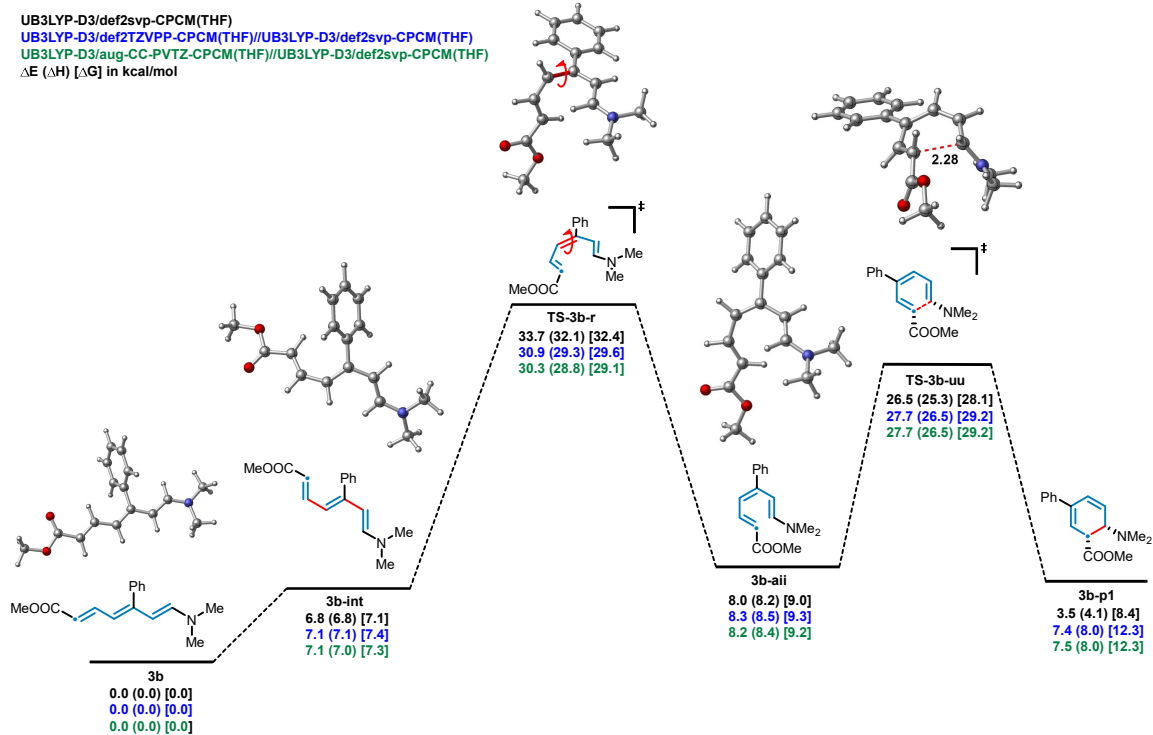

**Figure S15.** Minimum energy pathway for substrate **3b** under basic conditions till electrocyclization step calculated at different methods.



UB3LYP-D3/def2svp-CPCM(THF)  
 UB3LYP-D3/def2TZVP-CPCM(THF)//UB3LYP-D3/def2svp-CPCM(THF)  
 UB3LYP-D3/aug-CC-PVTZ-CPCM(THF)//UB3LYP-D3/def2svp-CPCM(THF)  
 UPBEPBE-D3/aug-CC-PVTZ-CPCM(THF)//UB3LYP-D3/def2svp-CPCM(THF)  
 UM06/aug-CC-PVTZ-CPCM(THF)//UB3LYP-D3/def2svp-CPCM(THF)  
 ΔE (ΔH) [ΔG] in kcal/mol

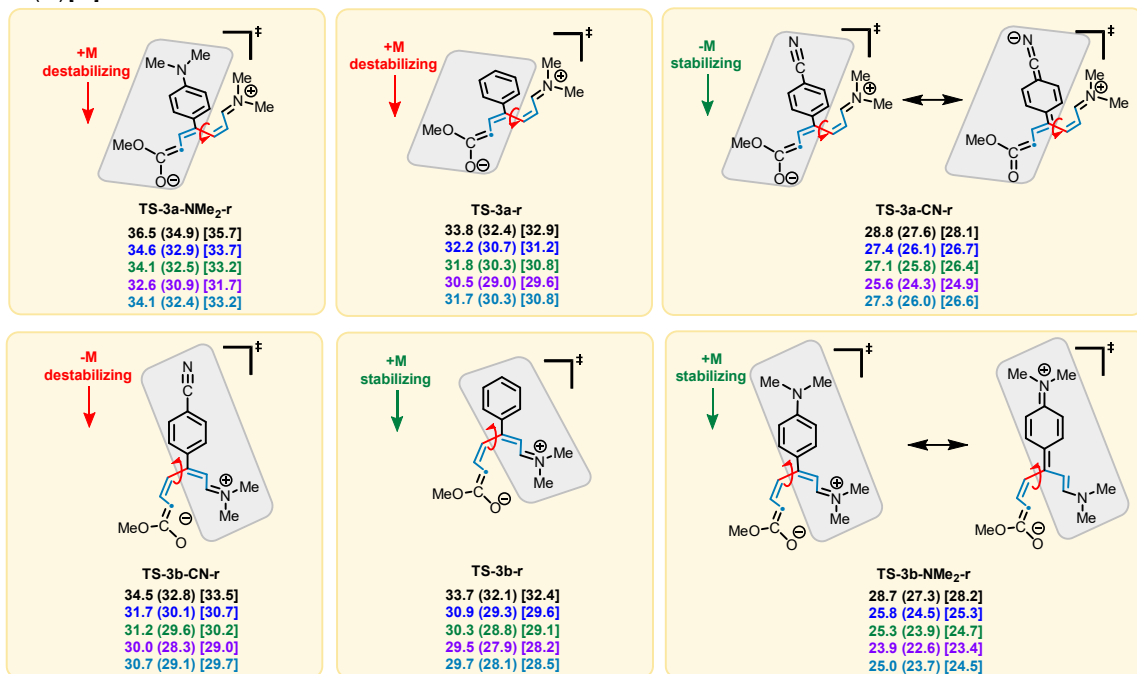

**Figure S16.** Probing the effect of electron donating and withdrawing groups in the key  $C_\gamma$ - $C_\delta$  rotation transition states for substrates **3a** and **3b** under basic conditions.

Increasing +M effect of Phenyl ring should hypothetically have destabilizing effect on **TS-3a-r** and stabilizing effect on **TS-3b-r**. Whereas increasing -M effect should stabilize **TS-3a-r** and destabilize **TS-3b-r**. A proof of concept is shown here where +M effect of phenyl ring is increased by introducing NMe<sub>2</sub> and -M effect is increased by introducing CN group. Predicted barriers are consistent with the hypothesis.

**Table 7.** Cartesian coordinates (xyz format) and energies of all the structures involved in each reaction mechanism studied calculated at the UB3LYP-d3/def2-svp/CPCM(THF) level of theory.

### 3a

E(scf) = -825.763525522 a.u.

$\nu_{\min} = 28.2 \text{ cm}^{-1}$

|   |           |          |           |   |           |           |           |
|---|-----------|----------|-----------|---|-----------|-----------|-----------|
| C | -0.152966 | 2.218025 | 0.394035  | C | -4.641762 | 0.636588  | -0.624015 |
| C | -1.490052 | 2.570486 | 0.384228  | O | -4.267301 | -0.487377 | -0.917740 |
| C | -2.456947 | 1.591783 | -0.039532 | O | -5.947263 | 1.000132  | -0.694817 |
| H | 0.080337  | 1.199584 | 0.057535  | C | 2.242256  | 2.516746  | 0.757333  |
| H | -2.059395 | 0.604221 | -0.303555 | H | 2.401160  | 1.495797  | 0.393730  |
| C | -3.805383 | 1.745323 | -0.165897 | H | 0.768336  | 4.023288  | 1.166674  |
| H | -4.306323 | 2.687206 | 0.062688  | C | -6.860571 | -0.002968 | -1.132403 |
| C | 0.955235  | 3.010912 | 0.805123  | H | -6.609026 | -0.354195 | -2.145835 |

|   |           |           |           |   |           |          |           |
|---|-----------|-----------|-----------|---|-----------|----------|-----------|
| H | -6.850837 | -0.871536 | -0.454762 | C | -1.940947 | 3.934210 | 0.795148  |
| H | -7.854899 | 0.461429  | -1.132355 | C | -2.796052 | 4.109873 | 1.898887  |
| N | 3.368452  | 3.165006  | 1.114677  | C | -1.523225 | 5.076809 | 0.088606  |
| C | 3.303884  | 4.527297  | 1.616489  | C | -3.216047 | 5.385647 | 2.286404  |
| H | 2.829114  | 5.197374  | 0.879800  | H | -3.130997 | 3.233037 | 2.458437  |
| H | 2.720122  | 4.581688  | 2.552127  | C | -1.940907 | 6.354151 | 0.474970  |
| H | 4.318512  | 4.893450  | 1.816619  | H | -0.864054 | 4.956593 | -0.774746 |
| C | 4.669740  | 2.519381  | 1.062739  | C | -2.789558 | 6.513378 | 1.575825  |
| H | 5.365404  | 3.087957  | 0.422529  | H | -3.877534 | 5.499955 | 3.149330  |
| H | 5.115420  | 2.442831  | 2.069793  | H | -1.605407 | 7.228425 | -0.089322 |
| H | 4.570038  | 1.506288  | 0.651074  | H | -3.117985 | 7.511144 | 1.878120  |

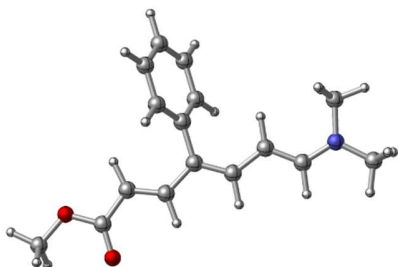

|                                              |                             |
|----------------------------------------------|-----------------------------|
| Zero-point correction=                       | 0.316565 (Hartree/Particle) |
| Thermal correction to Energy=                | 0.336293                    |
| Thermal correction to Enthalpy=              | 0.337238                    |
| Thermal correction to Gibbs Free Energy=     | 0.265520                    |
| Sum of electronic and zero-point Energies=   | -825.446961                 |
| Sum of electronic and thermal Energies=      | -825.427232                 |
| Sum of electronic and thermal Enthalpies=    | -825.426288                 |
| Sum of electronic and thermal Free Energies= | -825.498005                 |

### 3a-aii

E(scf) = -825.746690573 a.u.

$\nu_{\min} = 11.5 \text{ cm}^{-1}$

|   |           |          |          |   |           |           |          |
|---|-----------|----------|----------|---|-----------|-----------|----------|
| C | -0.173573 | 4.200421 | 0.503584 | C | 0.960023  | 3.439053  | 0.940974 |
| C | -1.548347 | 4.024016 | 0.564765 | C | -2.813644 | 0.412288  | 1.076044 |
| C | -2.264934 | 2.794627 | 0.877222 | O | -3.953522 | 0.530887  | 1.490965 |
| H | 0.127159  | 5.143281 | 0.031168 | O | -2.250826 | -0.798045 | 0.844285 |
| H | -3.308775 | 2.928601 | 1.185443 | C | 0.961033  | 2.449742  | 1.900833 |
| C | -1.877206 | 1.497853 | 0.764405 | H | 0.019630  | 2.166545  | 2.375464 |
| H | -0.883914 | 1.204256 | 0.423492 | H | 1.918814  | 3.768163  | 0.533200 |

|   |           |           |          |   |           |          |           |
|---|-----------|-----------|----------|---|-----------|----------|-----------|
| C | -3.068940 | -1.937302 | 1.105146 | H | 0.853973  | 0.678827 | 3.707754  |
| H | -3.377242 | -1.968869 | 2.162146 | C | -2.413120 | 5.190694 | 0.219312  |
| H | -3.976324 | -1.923716 | 0.480901 | C | -3.627484 | 5.018645 | -0.480920 |
| H | -2.459957 | -2.817670 | 0.864295 | C | -2.052775 | 6.508280 | 0.576788  |
| N | 2.033346  | 1.778318  | 2.362742 | C | -4.435294 | 6.108633 | -0.814622 |
| C | 3.361990  | 2.048774  | 1.840049 | H | -3.933338 | 4.017017 | -0.792912 |
| H | 4.086510  | 1.373317  | 2.311507 | C | -2.854988 | 7.599974 | 0.235489  |
| H | 3.395820  | 1.892797  | 0.748518 | H | -1.141429 | 6.676070 | 1.155664  |
| H | 3.667092  | 3.089601  | 2.045807 | C | -4.053002 | 7.407574 | -0.461570 |
| C | 1.906809  | 0.780720  | 3.413352 | H | -5.365731 | 5.941857 | -1.364187 |
| H | 2.267529  | -0.202571 | 3.066718 | H | -2.549405 | 8.607259 | 0.531549  |
| H | 2.493034  | 1.067348  | 4.303361 | H | -4.684612 | 8.260496 | -0.722559 |

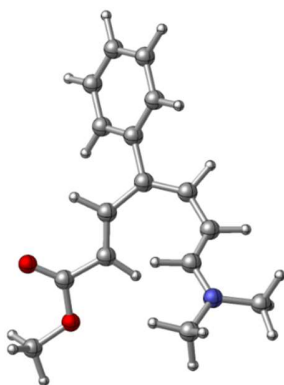

|                                              |                             |
|----------------------------------------------|-----------------------------|
| Zero-point correction=                       | 0.316582 (Hartree/Particle) |
| Thermal correction to Energy=                | 0.336314                    |
| Thermal correction to Enthalpy=              | 0.337258                    |
| Thermal correction to Gibbs Free Energy=     | 0.265004                    |
| Sum of electronic and zero-point Energies=   | -825.430108                 |
| Sum of electronic and thermal Energies=      | -825.410377                 |
| Sum of electronic and thermal Enthalpies=    | -825.409433                 |
| Sum of electronic and thermal Free Energies= | -825.481687                 |

### 3a-int

E(scf) = -825.751749528 a.u.

$\nu_{\min} = 22.2 \text{ cm}^{-1}$

|   |           |          |          |   |           |          |          |
|---|-----------|----------|----------|---|-----------|----------|----------|
| C | -0.208691 | 1.951213 | 0.683882 | C | -1.502571 | 2.411250 | 0.518978 |
|---|-----------|----------|----------|---|-----------|----------|----------|

|   |           |           |           |   |           |          |           |
|---|-----------|-----------|-----------|---|-----------|----------|-----------|
| C | -2.546271 | 1.551966  | -0.002603 | C | 3.362785  | 3.671937 | 2.473028  |
| H | -0.016470 | 0.953852  | 0.272126  | H | 4.105260  | 4.330641 | 2.940791  |
| H | -3.484816 | 2.055159  | -0.263723 | H | 3.484029  | 2.655750 | 2.888749  |
| C | -2.535066 | 0.204599  | -0.205788 | H | 3.568786  | 3.625159 | 1.391108  |
| H | -1.684423 | -0.426992 | 0.058137  | C | 1.886624  | 5.259527 | 3.696638  |
| C | 0.944934  | 2.534220  | 1.299456  | H | 2.194610  | 4.925232 | 4.703081  |
| C | -3.697786 | -0.469914 | -0.784409 | H | 2.509019  | 6.125733 | 3.417486  |
| O | -4.746369 | 0.049152  | -1.130241 | H | 0.839132  | 5.585657 | 3.743963  |
| O | -3.484899 | -1.805308 | -0.897897 | C | -1.911580 | 3.814914 | 0.832223  |
| C | 0.949300  | 3.626556  | 2.144711  | C | -2.926104 | 4.081778 | 1.768172  |
| H | 0.003430  | 4.102011  | 2.409300  | C | -1.311877 | 4.904581 | 0.170989  |
| H | 1.887189  | 2.013876  | 1.113684  | C | -3.316738 | 5.396049 | 2.051416  |
| C | -4.553828 | -2.571624 | -1.447952 | H | -3.406265 | 3.247667 | 2.286893  |
| H | -5.463642 | -2.481913 | -0.833368 | C | -1.698748 | 6.215852 | 0.451948  |
| H | -4.794726 | -2.239440 | -2.470331 | H | -0.525730 | 4.711135 | -0.563037 |
| H | -4.212232 | -3.614398 | -1.463017 | C | -2.701365 | 6.467943 | 1.398207  |
| N | 2.028263  | 4.190658  | 2.720639  | H | -4.103691 | 5.581294 | 2.787386  |

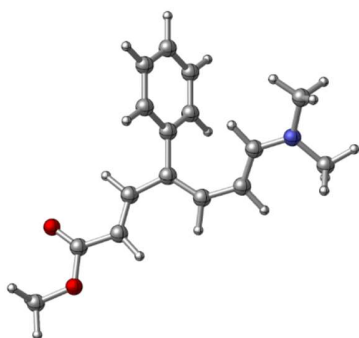

|                                              |                             |
|----------------------------------------------|-----------------------------|
| Zero-point correction=                       | 0.316368 (Hartree/Particle) |
| Thermal correction to Energy=                | 0.336168                    |
| Thermal correction to Enthalpy=              | 0.337112                    |
| Thermal correction to Gibbs Free Energy=     | 0.265146                    |
| Sum of electronic and zero-point Energies=   | -825.435382                 |
| Sum of electronic and thermal Energies=      | -825.415582                 |
| Sum of electronic and thermal Enthalpies=    | -825.414638                 |
| Sum of electronic and thermal Free Energies= | -825.486603                 |

### 3a-p1

E(scf) = -825.757528762 a.u.

$\nu_{\min} = 40.6 \text{ cm}^{-1}$

|   |           |           |           |   |           |          |           |
|---|-----------|-----------|-----------|---|-----------|----------|-----------|
| C | -1.393976 | 4.525141  | 0.936676  | C | -4.407689 | 4.215568 | 2.619988  |
| C | -1.135614 | 3.383502  | 1.834733  | H | -4.368591 | 3.223687 | 3.119013  |
| C | -1.956124 | 2.308280  | 1.760330  | H | -3.440195 | 4.711323 | 2.780212  |
| H | -1.875856 | 1.477710  | 2.464381  | H | -5.183500 | 4.815580 | 3.123267  |
| C | -3.002673 | 2.224344  | 0.690579  | C | -6.059206 | 3.668059 | 0.933114  |
| H | -2.500846 | 1.932722  | -0.252712 | H | -6.293247 | 2.671945 | 1.365487  |
| C | -2.540430 | 4.642472  | 0.239966  | H | -6.784429 | 4.380431 | 1.361849  |
| C | -4.046104 | 1.160177  | 0.956417  | H | -6.236728 | 3.614509 | -0.151073 |
| O | -4.233764 | 0.596435  | 2.011343  | H | -0.638006 | 5.312421 | 0.872592  |
| O | -4.771776 | 0.917132  | -0.146590 | C | -0.036344 | 3.471254 | 2.829688  |
| C | -3.652305 | 3.617290  | 0.339384  | C | 0.686906  | 2.325449 | 3.218169  |
| H | -4.102810 | 3.494877  | -0.655778 | C | 0.306160  | 4.701825 | 3.425110  |
| H | -2.744894 | 5.535085  | -0.357438 | C | 1.701867  | 2.404159 | 4.174072  |
| C | -5.835105 | -0.033260 | -0.023577 | H | 0.462370  | 1.365402 | 2.747836  |
| H | -5.448508 | -1.010570 | 0.301420  | C | 1.322665  | 4.781300 | 4.381219  |
| H | -6.581077 | 0.313213  | 0.708212  | H | -0.243564 | 5.606335 | 3.154530  |
| H | -6.290318 | -0.114029 | -1.017716 | C | 2.025290  | 3.633075 | 4.761184  |
| N | -4.706660 | 4.123644  | 1.202855  | H | 2.251740  | 1.501835 | 4.454331  |

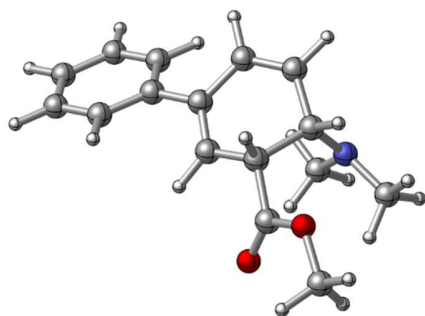

Zero-point correction= 0.319044 (Hartree/Particle)  
 Thermal correction to Energy= 0.336971  
 Thermal correction to Enthalpy= 0.337915  
 Thermal correction to Gibbs Free Energy= 0.272811  
 Sum of electronic and zero-point Energies= -825.438484  
 Sum of electronic and thermal Energies= -825.420558  
 Sum of electronic and thermal Enthalpies= -825.419614  
 Sum of electronic and thermal Free Energies= -825.484718

### 3b

E(scf) = -825.761853779 a.u.

$\nu_{\min} = 24.1 \text{ cm}^{-1}$

|   |          |          |           |   |           |          |           |
|---|----------|----------|-----------|---|-----------|----------|-----------|
| C | 0.190017 | 2.624312 | -0.750587 | C | -1.179429 | 2.482494 | -0.881058 |
|---|----------|----------|-----------|---|-----------|----------|-----------|

|   |           |           |           |   |           |           |           |
|---|-----------|-----------|-----------|---|-----------|-----------|-----------|
| C | -2.041593 | 1.823772  | 0.046585  | H | 1.755939  | 5.302180  | -3.786216 |
| H | -1.593803 | 1.372441  | 0.938195  | H | 3.312359  | 4.890994  | -4.561406 |
| C | -3.394212 | 1.698709  | -0.081977 | C | 4.472162  | 4.440949  | -2.372995 |
| H | -3.931797 | 2.119976  | -0.935339 | H | 5.130767  | 3.991926  | -3.135549 |
| C | 0.962979  | 3.252476  | -1.788425 | H | 4.633445  | 5.533495  | -2.381674 |
| C | -4.181011 | 0.992023  | 0.927062  | H | 4.770622  | 4.056411  | -1.388606 |
| O | -3.755298 | 0.461102  | 1.940405  | H | -1.645467 | 2.892543  | -1.784683 |
| O | -5.500972 | 0.984057  | 0.611554  | C | 0.888398  | 2.127049  | 0.475976  |
| C | 2.307231  | 3.534850  | -1.688491 | C | 0.649722  | 2.719329  | 1.727984  |
| H | 2.836852  | 3.280652  | -0.766646 | C | 1.798170  | 1.057486  | 0.398299  |
| H | 0.417654  | 3.537808  | -2.691213 | C | 1.301425  | 2.253101  | 2.873915  |
| C | -6.366137 | 0.320607  | 1.529821  | H | -0.053281 | 3.552747  | 1.798071  |
| H | -6.095651 | -0.742351 | 1.633228  | C | 2.445164  | 0.586907  | 1.544413  |
| H | -6.318715 | 0.786084  | 2.527242  | H | 1.991235  | 0.589722  | -0.570155 |
| H | -7.380678 | 0.411451  | 1.121367  | C | 2.199737  | 1.184473  | 2.785897  |
| N | 3.080614  | 4.111830  | -2.632763 | H | 1.105351  | 2.726647  | 3.839326  |
| C | 2.515817  | 4.509932  | -3.909989 | H | 3.142423  | -0.251415 | 1.467825  |
| H | 2.035313  | 3.653281  | -4.412041 | H | 2.706963  | 0.817791  | 3.681898  |

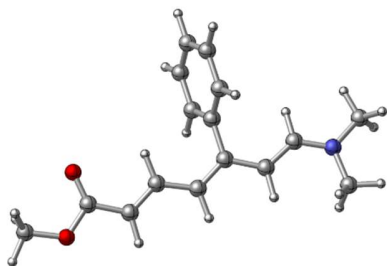

|                                              |                             |
|----------------------------------------------|-----------------------------|
| Zero-point correction=                       | 0.316297 (Hartree/Particle) |
| Thermal correction to Energy=                | 0.336109                    |
| Thermal correction to Enthalpy=              | 0.337054                    |
| Thermal correction to Gibbs Free Energy=     | 0.265006                    |
| Sum of electronic and zero-point Energies=   | -825.445557                 |
| Sum of electronic and thermal Energies=      | -825.425744                 |
| Sum of electronic and thermal Enthalpies=    | -825.424800                 |
| Sum of electronic and thermal Free Energies= | -825.496847                 |

### 3b-aii

E(scf) = -825.749051404 a.u.

$\nu_{\min} = 29.7 \text{ cm}^{-1}$

|   |           |          |          |   |           |          |          |
|---|-----------|----------|----------|---|-----------|----------|----------|
| C | -0.893350 | 4.880610 | 1.559728 | C | -0.244305 | 3.654799 | 1.535693 |
|---|-----------|----------|----------|---|-----------|----------|----------|

|   |           |           |          |   |           |          |           |
|---|-----------|-----------|----------|---|-----------|----------|-----------|
| C | -0.629296 | 2.347506  | 2.006757 | H | -5.075655 | 6.382819 | 1.668084  |
| H | 0.132145  | 1.578129  | 1.826626 | H | -6.243244 | 5.229887 | 2.378995  |
| C | -1.706302 | 1.895917  | 2.712260 | C | -5.514035 | 3.473435 | 0.694347  |
| H | -2.556848 | 2.522218  | 2.977363 | H | -6.281530 | 3.047412 | 1.360437  |
| C | -2.311965 | 5.096148  | 1.750487 | H | -6.027272 | 4.038181 | -0.105027 |
| C | -1.752211 | 0.508277  | 3.177325 | H | -4.958230 | 2.646786 | 0.231867  |
| O | -0.928430 | -0.365670 | 2.963310 | H | 0.784000  | 3.680957 | 1.163819  |
| O | -2.872969 | 0.275753  | 3.907142 | C | -0.070455 | 6.109585 | 1.352357  |
| C | -3.268205 | 4.231033  | 1.278961 | C | 1.240074  | 6.211014 | 1.862884  |
| H | -2.945473 | 3.360653  | 0.701230 | C | -0.590659 | 7.212497 | 0.644634  |
| H | -2.615765 | 6.045877  | 2.196277 | C | 2.004057  | 7.362816 | 1.662208  |
| C | -3.032815 | -1.045928 | 4.417037 | H | 1.652859  | 5.385111 | 2.446306  |
| H | -3.079180 | -1.783383 | 3.599925 | C | 0.173879  | 8.363482 | 0.440195  |
| H | -2.196795 | -1.319161 | 5.080323 | H | -1.600139 | 7.153424 | 0.231756  |
| H | -3.975031 | -1.049592 | 4.979646 | C | 1.475428  | 8.444002 | 0.947842  |
| N | -4.603918 | 4.322722  | 1.445746 | H | 3.014434  | 7.420798 | 2.075367  |
| C | -5.176520 | 5.420930  | 2.203688 | H | -0.247266 | 9.200632 | -0.122682 |
| H | -4.673472 | 5.518198  | 3.178842 | H | 2.072691  | 9.346039 | 0.792131  |

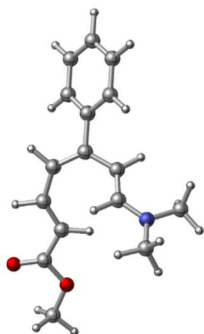

Zero-point correction= 0.316777 (Hartree/Particle)  
 Thermal correction to Energy= 0.336358  
 Thermal correction to Enthalpy= 0.337302  
 Thermal correction to Gibbs Free Energy= 0.266572  
 Sum of electronic and zero-point Energies= -825.432274  
 Sum of electronic and thermal Energies= -825.412693  
 Sum of electronic and thermal Enthalpies= -825.411749  
 Sum of electronic and thermal Free Energies= -825.482479

**3b-int**

E(scf) = -825.750949451 a.u.

 $\nu_{\min} = 22.7 \text{ cm}^{-1}$ 

|   |           |           |           |   |           |          |           |
|---|-----------|-----------|-----------|---|-----------|----------|-----------|
| C | -2.274478 | 4.252784  | 1.252468  | H | -5.138204 | 7.389518 | -0.079179 |
| C | -2.303673 | 2.869232  | 1.261230  | H | -4.243597 | 6.683457 | -1.454852 |
| C | -1.542640 | 1.934934  | 2.048135  | H | -5.999755 | 6.973647 | -1.589657 |
| H | -1.671765 | 0.885403  | 1.755750  | C | -6.849552 | 4.855055 | -0.473211 |
| C | -0.725874 | 2.123651  | 3.124142  | H | -7.501797 | 5.451686 | 0.190439  |
| H | -0.525858 | 3.104964  | 3.552306  | H | -7.243931 | 4.930788 | -1.499324 |
| C | -3.272043 | 5.068091  | 0.597612  | H | -6.904144 | 3.804882 | -0.155872 |
| C | -0.080697 | 0.980908  | 3.772509  | H | -3.030453 | 2.394134 | 0.595686  |
| O | -0.165626 | -0.191952 | 3.446631  | C | -1.165246 | 5.018815 | 1.897900  |
| O | 0.663666  | 1.378639  | 4.835589  | C | 0.168394  | 4.817812 | 1.499763  |
| C | -4.532476 | 4.629417  | 0.260066  | C | -1.437272 | 5.981413 | 2.884716  |
| H | -4.847895 | 3.627570  | 0.568140  | C | 1.204148  | 5.547764 | 2.085217  |
| H | -3.000248 | 6.108761  | 0.410250  | H | 0.385655  | 4.073902 | 0.729887  |
| C | 1.341704  | 0.350719  | 5.553362  | C | -0.398896 | 6.703924 | 3.481881  |
| H | 0.629281  | -0.380298 | 5.967795  | H | -2.471711 | 6.152162 | 3.193227  |
| H | 2.048112  | -0.188310 | 4.902136  | C | 0.924675  | 6.488867 | 3.084281  |
| H | 1.885580  | 0.847292  | 6.366977  | H | 2.235228  | 5.381896 | 1.762350  |
| N | -5.472276 | 5.318232  | -0.422924 | H | -0.625533 | 7.438767 | 4.258767  |
| C | -5.198979 | 6.659426  | -0.907358 | H | 1.736402  | 7.055961 | 3.547048  |

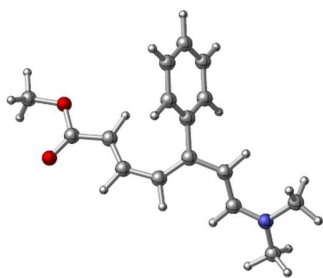

|                                              |                             |
|----------------------------------------------|-----------------------------|
| Zero-point correction=                       | 0.316329 (Hartree/Particle) |
| Thermal correction to Energy=                | 0.336064                    |
| Thermal correction to Enthalpy=              | 0.337008                    |
| Thermal correction to Gibbs Free Energy=     | 0.265442                    |
| Sum of electronic and zero-point Energies=   | -825.434621                 |
| Sum of electronic and thermal Energies=      | -825.414885                 |
| Sum of electronic and thermal Enthalpies=    | -825.413941                 |
| Sum of electronic and thermal Free Energies= | -825.485507                 |



**3b-p1**

E(scf) = -825.756268226 a.u.

 $\nu_{\min} = 38.5 \text{ cm}^{-1}$ 

|   |           |           |           |   |           |          |           |
|---|-----------|-----------|-----------|---|-----------|----------|-----------|
| C | -1.523942 | 4.619074  | 1.229361  | H | -4.774392 | 3.400492 | 3.086952  |
| C | -1.404978 | 3.505725  | 2.188748  | H | -3.813136 | 4.872823 | 2.773163  |
| C | -2.181687 | 2.412497  | 2.091594  | H | -5.587091 | 4.979609 | 2.874491  |
| H | -2.126205 | 1.604340  | 2.824277  | C | -6.160297 | 3.686182 | 0.666010  |
| C | -3.104150 | 2.253044  | 0.919154  | H | -6.457654 | 2.722792 | 1.132140  |
| H | -2.497492 | 1.892149  | 0.066396  | H | -6.934460 | 4.423946 | 0.937976  |
| C | -2.589203 | 4.658372  | 0.390439  | H | -6.186597 | 3.553957 | -0.425676 |
| C | -4.183112 | 1.213954  | 1.135595  | H | -0.670606 | 3.583683 | 2.993291  |
| O | -4.515027 | 0.746942  | 2.202141  | C | -0.508539 | 5.707188 | 1.242294  |
| O | -4.757420 | 0.871329  | -0.028550 | C | 0.046313  | 6.174716 | 2.449737  |
| C | -3.691750 | 3.620603  | 0.404546  | C | -0.084402 | 6.309952 | 0.041632  |
| H | -4.006656 | 3.439313  | -0.633407 | C | 0.977320  | 7.217193 | 2.457043  |
| H | -2.763250 | 5.529932  | -0.245691 | H | -0.269728 | 5.737359 | 3.399444  |
| C | -5.835894 | -0.067828 | 0.034893  | C | 0.847490  | 7.350524 | 0.048197  |
| H | -5.505447 | -1.009883 | 0.497014  | H | -0.478267 | 5.942716 | -0.908895 |
| H | -6.671261 | 0.341154  | 0.623901  | C | 1.382707  | 7.810277 | 1.256750  |
| H | -6.152824 | -0.240779 | -1.000346 | H | 1.385546  | 7.569963 | 3.407766  |
| N | -4.856020 | 4.166746  | 1.086130  | H | 1.165155  | 7.798037 | -0.897244 |
| C | -4.749614 | 4.356004  | 2.520845  | H | 2.114649  | 8.621879 | 1.262465  |

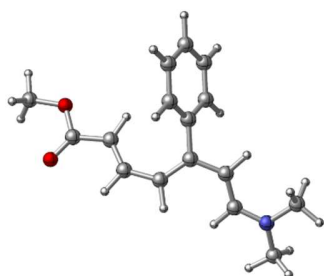

|                                              |                             |
|----------------------------------------------|-----------------------------|
| Zero-point correction=                       | 0.319005 (Hartree/Particle) |
| Thermal correction to Energy=                | 0.336951                    |
| Thermal correction to Enthalpy=              | 0.337895                    |
| Thermal correction to Gibbs Free Energy=     | 0.272782                    |
| Sum of electronic and zero-point Energies=   | -825.437264                 |
| Sum of electronic and thermal Energies=      | -825.419317                 |
| Sum of electronic and thermal Enthalpies=    | -825.418373                 |
| Sum of electronic and thermal Free Energies= | -825.483487                 |

**TS-3a-r**

E(scf) = -825.709631147 a.u.

 $\nu_{\min} = -511.0 \text{ cm}^{-1}$ 

|   |           |           |           |   |           |          |           |
|---|-----------|-----------|-----------|---|-----------|----------|-----------|
| C | -0.287755 | 3.316329  | -0.435546 | C | 2.970572  | 2.677126 | 2.277928  |
| C | -1.682626 | 3.437751  | 0.053349  | H | 3.571048  | 2.645601 | 3.193524  |
| C | -2.398208 | 2.251729  | 0.208041  | H | 3.190725  | 1.785728 | 1.672448  |
| H | -0.099146 | 3.379086  | -1.519121 | H | 3.231575  | 3.579620 | 1.709489  |
| H | -3.451115 | 2.332174  | 0.499715  | C | 1.223219  | 2.448001 | 4.047623  |
| C | -1.941654 | 0.937062  | 0.058786  | H | 1.620718  | 1.464782 | 4.340663  |
| H | -0.909018 | 0.712049  | -0.214272 | H | 1.688989  | 3.222578 | 4.674698  |
| C | 0.800413  | 3.094336  | 0.353161  | H | 0.136627  | 2.461453 | 4.191336  |
| C | -2.823761 | -0.171263 | 0.274827  | C | -2.214084 | 4.776571 | 0.288969  |
| O | -4.012428 | -0.141433 | 0.596283  | C | -3.537507 | 5.011326 | 0.755364  |
| O | -2.186576 | -1.380036 | 0.086764  | C | -1.418607 | 5.932678 | 0.059454  |
| C | 0.607738  | 2.901765  | 1.756962  | C | -4.019213 | 6.299926 | 0.972494  |
| H | -0.425546 | 2.910500  | 2.118745  | H | -4.198869 | 4.166364 | 0.956390  |
| H | 1.796190  | 3.012669  | -0.085989 | C | -1.907212 | 7.221672 | 0.280707  |
| C | -2.980370 | -2.539022 | 0.280120  | H | -0.392109 | 5.816882 | -0.298599 |
| H | -3.376056 | -2.596416 | 1.308330  | C | -3.213344 | 7.425019 | 0.739744  |
| H | -3.840138 | -2.564826 | -0.410497 | H | -5.044060 | 6.429951 | 1.333354  |
| H | -2.328309 | -3.402599 | 0.088229  | H | -1.255258 | 8.079347 | 0.088863  |
| N | 1.546115  | 2.699784  | 2.640754  | H | -3.596579 | 8.433498 | 0.913079  |

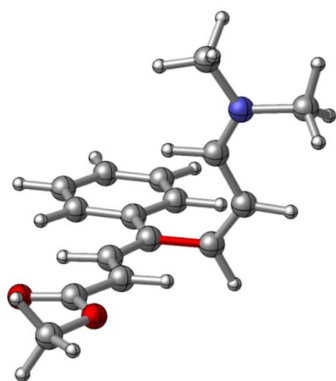

Zero-point correction= 0.314604 (Hartree/Particle)  
Thermal correction to Energy= 0.333973  
Thermal correction to Enthalpy= 0.334917  
Thermal correction to Gibbs Free Energy= 0.263999  
Sum of electronic and zero-point Energies= -825.395027

Sum of electronic and thermal Energies= -825.375658  
 Sum of electronic and thermal Enthalpies= -825.374714  
 Sum of electronic and thermal Free Energies= -825.445632

**TS-3a-uu**

E(scf) = -825.722678629 a.u.

$\nu_{\min} = -268.29 \text{ cm}^{-1}$

|   |           |           |           |   |           |          |           |
|---|-----------|-----------|-----------|---|-----------|----------|-----------|
| C | -1.495684 | 4.504547  | 1.301991  | H | -5.808306 | 4.237914 | 3.086542  |
| C | -1.038586 | 3.316276  | 1.974658  | H | -4.243093 | 5.064986 | 2.813453  |
| C | -1.834935 | 2.176127  | 1.964462  | H | -5.764527 | 5.811701 | 2.242369  |
| H | -1.787844 | 1.474242  | 2.805855  | C | -6.293145 | 3.561027 | 0.576351  |
| C | -2.781768 | 1.943295  | 0.946054  | H | -6.718103 | 2.833805 | 1.290341  |
| H | -2.471224 | 2.141071  | -0.078954 | H | -7.052515 | 4.338402 | 0.388437  |
| C | -2.751051 | 4.792529  | 0.815485  | H | -6.073633 | 3.039463 | -0.363287 |
| C | -3.840507 | 0.955502  | 1.121064  | H | -0.824250 | 5.366975 | 1.357438  |
| O | -4.151745 | 0.402581  | 2.162566  | C | 0.153994  | 3.384376 | 2.855392  |
| O | -4.522771 | 0.745285  | -0.038814 | C | 0.918313  | 2.222200 | 3.100279  |
| C | -3.876259 | 3.905138  | 0.563797  | C | 0.562704  | 4.575613 | 3.494737  |
| H | -3.943018 | 3.381362  | -0.386366 | C | 2.027199  | 2.245119 | 3.949708  |
| H | -3.004777 | 5.858451  | 0.744064  | H | 0.647200  | 1.291792 | 2.595630  |
| C | -5.635566 | -0.142548 | 0.033334  | C | 1.679004  | 4.602197 | 4.333831  |
| H | -5.326772 | -1.139679 | 0.383378  | H | -0.016102 | 5.491611 | 3.357828  |
| H | -6.404394 | 0.243234  | 0.722390  | C | 2.417921  | 3.436926 | 4.569684  |
| H | -6.045012 | -0.209981 | -0.982516 | H | 2.598696  | 1.327924 | 4.116343  |
| N | -5.079640 | 4.154375  | 1.115348  | H | 1.966274  | 5.539379 | 4.818422  |
| C | -5.229293 | 4.856743  | 2.379736  | H | 3.289991  | 3.458680 | 5.228135  |

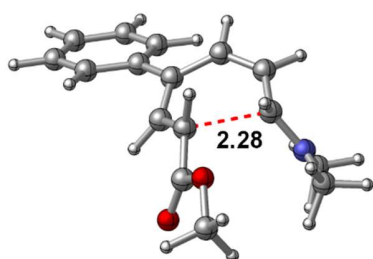

Zero-point correction= 0.315729 (Hartree/Particle)  
 Thermal correction to Energy= 0.334345  
 Thermal correction to Enthalpy= 0.335289  
 Thermal correction to Gibbs Free Energy= 0.267895  
 Sum of electronic and zero-point Energies= -825.406950

Sum of electronic and thermal Energies= -825.388333  
 Sum of electronic and thermal Enthalpies= -825.387389  
 Sum of electronic and thermal Free Energies= -825.454784

**TS-3b-r**

E(scf) = -825.708129187 a.u.

$\nu_{\min} = -616.9 \text{ cm}^{-1}$

|   |           |           |          |   |           |          |           |
|---|-----------|-----------|----------|---|-----------|----------|-----------|
| C | -1.535890 | 4.847069  | 0.936048 | H | -5.225962 | 6.626015 | 0.332797  |
| C | -1.126704 | 3.523600  | 0.402169 | H | -6.795428 | 5.822143 | 0.610691  |
| C | -1.148623 | 2.380361  | 1.164573 | H | -5.631284 | 5.985947 | 1.957883  |
| H | -0.809618 | 1.455633  | 0.680123 | C | -6.094965 | 3.454261 | 0.158518  |
| C | -1.587200 | 2.227105  | 2.499703 | H | -6.777039 | 3.272597 | 1.003378  |
| H | -1.953104 | 3.082146  | 3.073254 | H | -6.689029 | 3.755518 | -0.717544 |
| C | -2.866816 | 5.223912  | 0.942148 | H | -5.548196 | 2.531588 | -0.069332 |
| C | -1.571211 | 0.955959  | 3.135626 | H | -0.804497 | 3.498913 | -0.643250 |
| O | -1.207496 | -0.131315 | 2.673297 | C | -0.502374 | 5.751852 | 1.484249  |
| O | -2.043321 | 1.019419  | 4.441174 | C | 0.748398  | 5.221167 | 1.869589  |
| C | -3.859818 | 4.298685  | 0.536290 | C | -0.710378 | 7.142552 | 1.632738  |
| H | -3.517871 | 3.303837  | 0.235835 | C | 1.737774  | 6.040296 | 2.411953  |
| H | -3.173225 | 6.190755  | 1.341508 | H | 0.918737  | 4.150649 | 1.747472  |
| C | -2.061311 | -0.203626 | 5.151874 | C | 0.289190  | 7.963782 | 2.152097  |
| H | -2.706637 | -0.955342 | 4.664866 | H | -1.649768 | 7.596397 | 1.312468  |
| H | -1.053097 | -0.644020 | 5.241884 | C | 1.514653  | 7.415442 | 2.551349  |
| H | -2.453214 | 0.018729  | 6.155061 | H | 2.691659  | 5.606156 | 2.721174  |
| N | -5.154270 | 4.518749  | 0.508082 | H | 0.114504  | 9.038624 | 2.242670  |
| C | -5.731927 | 5.815455  | 0.875055 | H | 2.295595  | 8.060233 | 2.962186  |

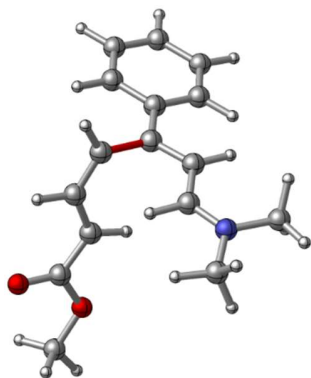

Zero-point correction= 0.314159 (Hartree/Particle)  
 Thermal correction to Energy= 0.333604  
 Thermal correction to Enthalpy= 0.334548  
 Thermal correction to Gibbs Free Energy= 0.263025  
 Sum of electronic and zero-point Energies= -825.393970  
 Sum of electronic and thermal Energies= -825.374525  
 Sum of electronic and thermal Enthalpies= -825.373581  
 Sum of electronic and thermal Free Energies= -825.445104

### TS-3b-uu

E(scf) = -825.719525678 a.u.

$\nu_{\min} = -292.22 \text{ cm}^{-1}$

|   |           |           |           |   |           |          |           |
|---|-----------|-----------|-----------|---|-----------|----------|-----------|
| C | -1.422207 | 4.469523  | 1.262841  | H | -5.858497 | 4.350218 | 2.953609  |
| C | -1.050753 | 3.254791  | 1.934769  | H | -4.237883 | 5.082347 | 2.744770  |
| C | -1.856240 | 2.138812  | 1.988745  | H | -5.684457 | 5.904458 | 2.090813  |
| H | -1.771928 | 1.447589  | 2.836894  | C | -6.254479 | 3.631609 | 0.447019  |
| C | -2.838093 | 1.891962  | 1.000525  | H | -6.743678 | 2.944641 | 1.160183  |
| H | -2.533585 | 2.014737  | -0.037058 | H | -6.971824 | 4.432910 | 0.200716  |
| C | -2.694107 | 4.757677  | 0.778512  | H | -6.016730 | 3.071576 | -0.465742 |
| C | -3.927736 | 0.954629  | 1.242733  | H | -0.162511 | 3.296482 | 2.569903  |
| O | -4.238969 | 0.465902  | 2.316173  | C | -0.456403 | 5.612467 | 1.302562  |
| O | -4.641882 | 0.715042  | 0.107875  | C | 0.325462  | 5.896350 | 2.439683  |
| C | -3.824932 | 3.889596  | 0.518610  | C | -0.319333 | 6.453417 | 0.180951  |
| H | -3.879914 | 3.343473  | -0.419172 | C | 1.207850  | 6.979433 | 2.453586  |
| H | -2.952787 | 5.823688  | 0.751424  | H | 0.225524  | 5.279466 | 3.335231  |
| C | -5.791171 | -0.115824 | 0.247735  | C | 0.565620  | 7.535508 | 0.192317  |
| H | -5.519698 | -1.108513 | 0.639110  | H | -0.904805 | 6.240031 | -0.716466 |
| H | -6.524687 | 0.337449  | 0.934333  | C | 1.334122  | 7.803656 | 1.329472  |
| H | -6.228258 | -0.212651 | -0.754161 | H | 1.795374  | 7.185346 | 3.352183  |
| N | -5.042100 | 4.189452  | 1.022262  | H | 0.658853  | 8.167788 | -0.694602 |
| C | -5.212285 | 4.922239  | 2.265601  | H | 2.027205  | 8.648700 | 1.340639  |

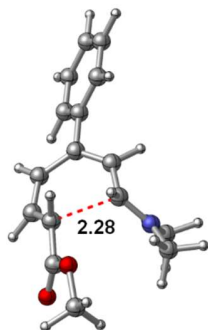

Zero-point correction= 0.315467 (Hartree/Particle)  
 Thermal correction to Energy= 0.334150  
 Thermal correction to Enthalpy= 0.335094  
 Thermal correction to Gibbs Free Energy= 0.267470  
 Sum of electronic and zero-point Energies= -825.404059  
 Sum of electronic and thermal Energies= -825.385376  
 Sum of electronic and thermal Enthalpies= -825.384431  
 Sum of electronic and thermal Free Energies= -825.452055

### 3a-H

E(scf) = -826.181186664 a.u.

$\nu_{\min} = 28.74 \text{ cm}^{-1}$

|   |           |           |           |   |           |          |           |
|---|-----------|-----------|-----------|---|-----------|----------|-----------|
| C | -0.100630 | 2.121677  | 0.156164  | C | 3.186094  | 4.749639 | 1.227306  |
| C | -1.414551 | 2.480055  | 0.270974  | H | 2.600026  | 5.291182 | 0.476625  |
| C | -2.430593 | 1.511614  | -0.126944 | H | 2.633451  | 4.675952 | 2.170438  |
| H | 0.131264  | 1.132252  | -0.250337 | H | 4.143917  | 5.254345 | 1.395240  |
| H | -2.073149 | 0.522098  | -0.431991 | C | 4.334006  | 2.596645 | 1.692239  |
| C | -3.762562 | 1.726257  | -0.172166 | H | 5.252871  | 3.166998 | 1.875443  |
| H | -4.211911 | 2.682400  | 0.100990  | H | 3.765201  | 2.465830 | 2.620092  |
| C | 1.021744  | 2.948595  | 0.545371  | H | 4.575716  | 1.621853 | 1.252566  |
| C | -4.679299 | 0.649587  | -0.612296 | C | -1.832527 | 3.824730 | 0.764388  |
| O | -4.347135 | -0.470899 | -0.943401 | C | -2.597964 | 3.950874 | 1.937778  |
| O | -5.954827 | 1.070811  | -0.602892 | C | -1.468357 | 4.987801 | 0.062812  |
| C | 2.292326  | 2.573980  | 0.328944  | C | -2.977676 | 5.211914 | 2.403817  |
| H | 2.569680  | 1.635441  | -0.154477 | H | -2.888780 | 3.054312 | 2.490004  |
| H | 0.792890  | 3.899527  | 1.029379  | C | -1.854033 | 6.248721 | 0.527589  |
| C | -6.944789 | 0.121905  | -1.012593 | H | -0.887706 | 4.898542 | -0.858593 |
| H | -6.761951 | -0.209383 | -2.046272 | C | -2.607596 | 6.363818 | 1.700023  |
| H | -6.934520 | -0.760015 | -0.354012 | H | -3.565275 | 5.295470 | 3.321328  |
| H | -7.910491 | 0.636512  | -0.943665 | H | -1.567707 | 7.143081 | -0.031248 |
| N | 3.472675  | 3.367606  | 0.722312  | H | -2.909134 | 7.349071 | 2.063941  |

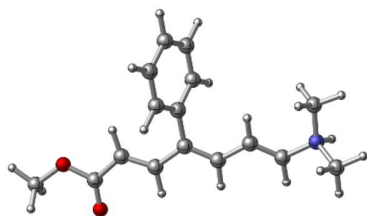

Zero-point correction= 0.332185 (Hartree/Particle)  
 Thermal correction to Energy= 0.351576  
 Thermal correction to Enthalpy= 0.352520

|                                              |             |
|----------------------------------------------|-------------|
| Thermal correction to Gibbs Free Energy=     | 0.282131    |
| Sum of electronic and zero-point Energies=   | -825.849002 |
| Sum of electronic and thermal Energies=      | -825.829611 |
| Sum of electronic and thermal Enthalpies=    | -825.828667 |
| Sum of electronic and thermal Free Energies= | -825.899056 |

### 3a-H-aii

E(scf) = -826.167461541 a.u.

$\nu_{\min} = 27.35 \text{ cm}^{-1}$

|   |           |           |           |   |           |           |           |
|---|-----------|-----------|-----------|---|-----------|-----------|-----------|
| C | -0.169656 | 3.157630  | 0.683134  | C | 2.591542  | -0.208678 | 0.981846  |
| C | -1.530105 | 3.184716  | 0.707329  | H | 3.137063  | -1.134706 | 1.195941  |
| C | -2.376305 | 1.974035  | 0.790506  | H | 2.183226  | -0.237112 | -0.034334 |
| H | 0.348627  | 4.100267  | 0.482271  | H | 3.256852  | 0.652395  | 1.109304  |
| H | -3.178044 | 1.978814  | 1.538900  | C | 1.966547  | -0.128698 | 3.382416  |
| C | -2.296536 | 0.913914  | -0.029881 | H | 2.553914  | -1.042914 | 3.529268  |
| H | -1.555628 | 0.856258  | -0.830461 | H | 2.586594  | 0.761492  | 3.539010  |
| C | 0.733851  | 2.022620  | 0.880179  | H | 1.107138  | -0.117384 | 4.062852  |
| C | -3.222270 | -0.234198 | 0.126597  | C | -2.268404 | 4.473869  | 0.624005  |
| O | -4.092128 | -0.329264 | 0.967654  | C | -3.532964 | 4.526097  | 0.003983  |
| O | -2.974592 | -1.179862 | -0.794216 | C | -1.737321 | 5.664124  | 1.161635  |
| C | 0.540043  | 1.033728  | 1.759272  | C | -4.232091 | 5.731222  | -0.095828 |
| H | -0.329198 | 0.970603  | 2.414444  | H | -3.965339 | 3.617801  | -0.421876 |
| H | 1.652286  | 2.057728  | 0.287697  | C | -2.437914 | 6.866980  | 1.062885  |
| C | -3.808223 | -2.343447 | -0.755950 | H | -0.779020 | 5.643170  | 1.685116  |
| H | -3.711068 | -2.859952 | 0.211230  | C | -3.686809 | 6.906356  | 0.431330  |
| H | -4.863996 | -2.069890 | -0.903705 | H | -5.206871 | 5.751914  | -0.589191 |
| H | -3.466317 | -2.993015 | -1.570342 | H | -2.012076 | 7.777330  | 1.491969  |
| N | 1.462656  | -0.101344 | 1.961091  | H | -4.235682 | 7.848373  | 0.357971  |

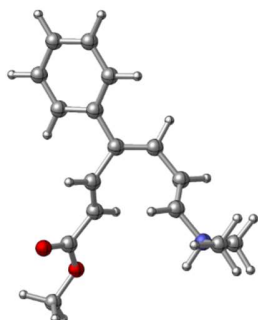

Zero-point correction= 0.331809 (Hartree/Particle)  
 Thermal correction to Energy= 0.351290  
 Thermal correction to Enthalpy= 0.352234  
 Thermal correction to Gibbs Free Energy= 0.281721  
 Sum of electronic and zero-point Energies= -825.835652  
 Sum of electronic and thermal Energies= -825.816172  
 Sum of electronic and thermal Enthalpies= -825.815228  
 Sum of electronic and thermal Free Energies= -825.885740

### 3a-H-int

E(scf) = -826.170479003 a.u.

$\nu_{\min} = 30.83 \text{ cm}^{-1}$

|   |           |           |           |   |           |          |           |
|---|-----------|-----------|-----------|---|-----------|----------|-----------|
| C | -0.534773 | 0.856537  | 0.206425  | C | 3.092720  | 1.362459 | 2.599365  |
| C | -1.654864 | 1.626429  | 0.115023  | H | 3.862818  | 1.590510 | 3.345139  |
| C | -2.811524 | 1.189627  | -0.680483 | H | 2.978108  | 0.277768 | 2.495821  |
| H | -0.476105 | -0.035915 | -0.423725 | H | 3.357391  | 1.818292 | 1.638765  |
| H | -3.446712 | 1.979792  | -1.095557 | C | 1.908521  | 3.438546 | 3.283248  |
| C | -3.185731 | -0.085242 | -0.905978 | H | 2.723267  | 3.634892 | 3.990500  |
| H | -2.652502 | -0.938037 | -0.479702 | H | 2.113568  | 3.901102 | 2.310849  |
| C | 0.646855  | 1.089526  | 1.037210  | H | 0.957952  | 3.811128 | 3.682609  |
| C | -4.377687 | -0.384796 | -1.735342 | C | -1.786067 | 2.967560 | 0.759943  |
| O | -5.095241 | 0.438960  | -2.264671 | C | -2.864848 | 3.237055 | 1.618798  |
| O | -4.575823 | -1.709944 | -1.828823 | C | -0.846284 | 3.983763 | 0.509324  |
| C | 0.610801  | 1.642941  | 2.255234  | C | -2.982174 | 4.484075 | 2.241925  |
| H | -0.308854 | 1.972566  | 2.738890  | H | -3.608165 | 2.459206 | 1.811592  |
| H | 1.592796  | 0.735721  | 0.618358  | C | -0.968111 | 5.230319 | 1.125410  |
| C | -5.701852 | -2.135054 | -2.603771 | H | -0.014696 | 3.787453 | -0.171293 |
| H | -6.637151 | -1.738272 | -2.180284 | C | -2.032566 | 5.481806 | 2.000527  |
| H | -5.611679 | -1.787197 | -3.644157 | H | -3.820123 | 4.675961 | 2.916529  |
| H | -5.703078 | -3.230877 | -2.567999 | H | -0.232204 | 6.011500 | 0.918925  |
| N | 1.798231  | 1.946723  | 3.076098  | H | -2.126107 | 6.457126 | 2.484328  |



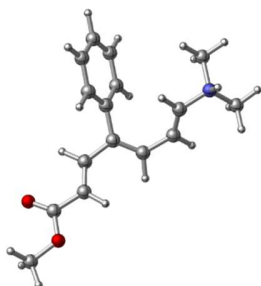

|                                              |                             |
|----------------------------------------------|-----------------------------|
| Zero-point correction=                       | 0.331925 (Hartree/Particle) |
| Thermal correction to Energy=                | 0.351354                    |
| Thermal correction to Enthalpy=              | 0.352298                    |
| Thermal correction to Gibbs Free Energy=     | 0.282042                    |
| Sum of electronic and zero-point Energies=   | -825.838554                 |
| Sum of electronic and thermal Energies=      | -825.819125                 |
| Sum of electronic and thermal Enthalpies=    | -825.818181                 |
| Sum of electronic and thermal Free Energies= | -825.888437                 |

### 3a-H-p1

E(scf) = -826.202040660 a.u.

$\nu_{\min} = 40.68 \text{ cm}^{-1}$

|   |           |           |           |   |           |          |           |
|---|-----------|-----------|-----------|---|-----------|----------|-----------|
| C | -1.379254 | 4.532644  | 0.920408  | H | -4.357931 | 3.172361 | 3.009820  |
| C | -1.158093 | 3.400937  | 1.839799  | H | -3.430730 | 4.703947 | 2.818643  |
| C | -1.998861 | 2.344747  | 1.756659  | H | -5.184249 | 4.757602 | 3.202198  |
| H | -1.923383 | 1.494842  | 2.436279  | C | -6.092193 | 3.643709 | 0.959184  |
| C | -3.048624 | 2.280473  | 0.680948  | H | -6.151146 | 2.652108 | 1.417586  |
| H | -2.545163 | 1.954861  | -0.250211 | H | -6.832499 | 4.300629 | 1.430943  |
| C | -2.502768 | 4.669919  | 0.190984  | H | -6.275134 | 3.583522 | -0.119292 |
| C | -4.124483 | 1.236054  | 0.948204  | H | -0.597241 | 5.291000 | 0.837825  |
| O | -4.392712 | 0.784603  | 2.038035  | C | -0.055618 | 3.472097 | 2.831509  |
| O | -4.758497 | 0.911089  | -0.178075 | C | 0.640486  | 2.313107 | 3.226838  |
| C | -3.615018 | 3.656961  | 0.276868  | C | 0.308237  | 4.701741 | 3.413949  |
| H | -4.119088 | 3.557582  | -0.692086 | C | 1.656887  | 2.380256 | 4.181535  |
| H | -2.650939 | 5.532101  | -0.464124 | H | 0.398057  | 1.353585 | 2.764631  |
| C | -5.821918 | -0.052654 | -0.078827 | C | 1.324788  | 4.767877 | 4.370584  |
| H | -5.445491 | -0.993210 | 0.347374  | H | -0.220972 | 5.616288 | 3.135456  |
| H | -6.631448 | 0.332101  | 0.559276  | C | 2.002792  | 3.607809 | 4.758404  |
| H | -6.183743 | -0.208716 | -1.100927 | H | 2.189489  | 1.470358 | 4.469137  |
| N | -4.729268 | 4.223204  | 1.204469  | H | 1.585693  | 5.730796 | 4.816598  |
| C | -4.396669 | 4.212375  | 2.668023  | H | 2.801187  | 3.660131 | 5.502620  |

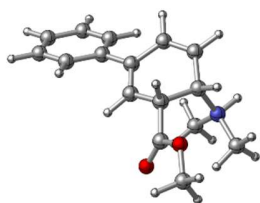

Zero-point correction= 0.335181 (Hartree/Particle)  
 Thermal correction to Energy= 0.353021  
 Thermal correction to Enthalpy= 0.353965  
 Thermal correction to Gibbs Free Energy= 0.289026  
 Sum of electronic and zero-point Energies= -825.866860  
 Sum of electronic and thermal Energies= -825.849020  
 Sum of electronic and thermal Enthalpies= -825.848076  
 Sum of electronic and thermal Free Energies= -825.913015

### 3a-OH'

E(scf) = -826.190534011 a.u.

$\nu_{\min} = 28.85 \text{ cm}^{-1}$

|   |           |           |           |   |           |          |           |
|---|-----------|-----------|-----------|---|-----------|----------|-----------|
| C | -0.116021 | 2.185927  | 0.381171  | C | 3.253286  | 4.535185 | 1.659827  |
| C | -1.482376 | 2.537235  | 0.356773  | H | 2.805412  | 5.201375 | 0.906399  |
| C | -2.407354 | 1.574156  | -0.067462 | H | 2.638736  | 4.568517 | 2.572915  |
| H | 0.131063  | 1.173181  | 0.039960  | H | 4.260009  | 4.896836 | 1.897619  |
| H | -1.975334 | 0.601252  | -0.334595 | C | 4.667124  | 2.562146 | 1.078972  |
| C | -3.790810 | 1.743338  | -0.187946 | H | 5.320680  | 3.158901 | 0.423369  |
| H | -4.257010 | 2.698500  | 0.053099  | H | 5.118380  | 2.523875 | 2.082961  |
| C | 0.941585  | 2.990215  | 0.802755  | H | 4.595515  | 1.542659 | 0.680179  |
| C | -4.666864 | 0.746410  | -0.615679 | C | -1.928897 | 3.901350 | 0.773813  |
| O | -4.353689 | -0.491954 | -0.951866 | C | -2.709815 | 4.078292 | 1.929242  |
| O | -5.942651 | 1.031575  | -0.703604 | C | -1.572692 | 5.032775 | 0.018924  |
| C | 2.255390  | 2.507069  | 0.771388  | C | -3.124635 | 5.354912 | 2.320214  |
| H | 2.431810  | 1.490804  | 0.404460  | H | -2.990263 | 3.206374 | 2.525469  |
| H | 0.734524  | 3.999718  | 1.159633  | C | -1.986555 | 6.309486 | 0.410110  |
| C | -6.882979 | 0.031132  | -1.139476 | H | -0.968524 | 4.907123 | -0.883096 |
| H | -6.641297 | -0.303569 | -2.158223 | C | -2.763723 | 6.473915 | 1.561927  |
| H | -6.873119 | -0.828426 | -0.454475 | H | -3.729685 | 5.475937 | 3.222298  |
| H | -7.860862 | 0.523889  | -1.120826 | H | -1.703698 | 7.178662 | -0.189108 |
| N | 3.340495  | 3.167755  | 1.148860  | H | -3.087734 | 7.471850 | 1.867620  |

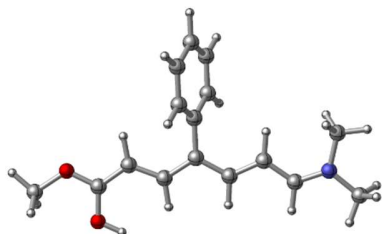

Zero-point correction= 0.329657 (Hartree/Particle)  
 Thermal correction to Energy= 0.349534  
 Thermal correction to Enthalpy= 0.350478  
 Thermal correction to Gibbs Free Energy= 0.279080  
 Sum of electronic and zero-point Energies= -825.860877  
 Sum of electronic and thermal Energies= -825.841000  
 Sum of electronic and thermal Enthalpies= -825.840056  
 Sum of electronic and thermal Free Energies= -825.911454

### 3a-OH-aii'

E(scf) = -826.172422162 a.u.

$\nu_{\min} = 33.33 \text{ cm}^{-1}$

|   |           |           |           |   |           |          |           |
|---|-----------|-----------|-----------|---|-----------|----------|-----------|
| C | -0.198834 | 4.045906  | 0.175964  | N | 1.796037  | 1.874445 | 2.393536  |
| C | -1.600991 | 3.874786  | 0.415434  | C | 3.098936  | 1.752120 | 1.735781  |
| C | -2.233391 | 2.650286  | 0.671641  | H | 3.666953  | 0.945002 | 2.212432  |
| H | 0.049414  | 4.854900  | -0.521777 | H | 2.967204  | 1.515939 | 0.670880  |
| H | -3.307884 | 2.752181  | 0.866713  | H | 3.666296  | 2.691528 | 1.830157  |
| C | -1.742310 | 1.334357  | 0.604799  | C | 1.642913  | 1.209115 | 3.686517  |
| H | -0.709626 | 1.122694  | 0.329902  | H | 1.810706  | 0.127821 | 3.569828  |
| C | 0.896963  | 3.377823  | 0.705933  | H | 2.382451  | 1.606211 | 4.399183  |
| C | -2.524045 | 0.209085  | 0.828533  | H | 0.633837  | 1.380609 | 4.080254  |
| O | -3.789811 | 0.182961  | 1.217552  | C | -2.446315 | 5.092529 | 0.254710  |
| O | -1.982958 | -0.977522 | 0.654189  | C | -3.726976 | 5.043295 | -0.334602 |
| C | 0.822121  | 2.593100  | 1.873640  | C | -1.968419 | 6.346247 | 0.689087  |
| H | -0.115517 | 2.588503  | 2.435866  | C | -4.501662 | 6.197208 | -0.469822 |
| H | 1.873021  | 3.571038  | 0.257211  | H | -4.112415 | 4.096248 | -0.719922 |
| C | -2.756145 | -2.166521 | 0.894340  | C | -2.739272 | 7.502610 | 0.544556  |
| H | -3.098677 | -2.200464 | 1.938605  | H | -0.989007 | 6.411975 | 1.169988  |
| H | -3.623879 | -2.205540 | 0.220420  | C | -4.011560 | 7.433050 | -0.032100 |
| H | -2.077951 | -3.001923 | 0.688871  | H | -5.488752 | 6.133112 | -0.934756 |

|   |           |          |          |   |           |          |           |
|---|-----------|----------|----------|---|-----------|----------|-----------|
| H | -2.347555 | 8.460900 | 0.895013 | H | -4.616957 | 8.336001 | -0.142536 |
|---|-----------|----------|----------|---|-----------|----------|-----------|

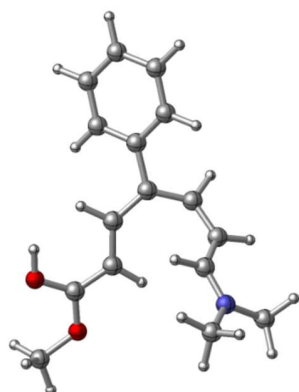

|                                              |                             |
|----------------------------------------------|-----------------------------|
| Zero-point correction=                       | 0.329684 (Hartree/Particle) |
| Thermal correction to Energy=                | 0.349435                    |
| Thermal correction to Enthalpy=              | 0.350379                    |
| Thermal correction to Gibbs Free Energy=     | 0.279735                    |
| Sum of electronic and zero-point Energies=   | -825.842738                 |
| Sum of electronic and thermal Energies=      | -825.822987                 |
| Sum of electronic and thermal Enthalpies=    | -825.822043                 |
| Sum of electronic and thermal Free Energies= | -825.892687                 |

### 3a-OH-int'

E(scf) = -826.179621676 a.u.

$\nu_{\min} = 23.47 \text{ cm}^{-1}$

|   |           |           |           |   |           |           |           |
|---|-----------|-----------|-----------|---|-----------|-----------|-----------|
| C | -0.214486 | 1.905558  | 0.879927  | C | -4.446254 | -2.707820 | -1.275786 |
| C | -1.538248 | 2.363624  | 0.678244  | H | -5.299492 | -2.694822 | -0.582927 |
| C | -2.537570 | 1.495119  | 0.210803  | H | -4.763785 | -2.338410 | -2.261260 |
| H | -0.017088 | 0.891226  | 0.520369  | H | -4.038960 | -3.720979 | -1.360718 |
| H | -3.507112 | 1.986106  | 0.058935  | N | 1.992990  | 4.311948  | 2.667695  |
| C | -2.468143 | 0.122357  | -0.064265 | C | 3.317096  | 3.694342  | 2.592290  |
| H | -1.558403 | -0.454724 | 0.100113  | H | 3.323525  | 2.729078  | 3.121849  |
| C | 0.906643  | 2.510494  | 1.455622  | H | 3.604984  | 3.527279  | 1.543499  |
| C | -3.540444 | -0.620673 | -0.552220 | H | 4.052003  | 4.359113  | 3.059857  |
| O | -4.751589 | -0.174756 | -0.836138 | C | 1.890501  | 5.585973  | 3.375939  |
| O | -3.367726 | -1.904309 | -0.761168 | H | 2.205375  | 5.461133  | 4.423814  |
| C | 0.926679  | 3.744875  | 2.128097  | H | 2.543375  | 6.333498  | 2.899139  |
| H | -0.001011 | 4.303108  | 2.253599  | H | 0.854589  | 5.946059  | 3.350634  |
| H | 1.833263  | 1.936655  | 1.405103  | C | -1.932953 | 3.785550  | 0.930660  |

|   |           |          |          |   |           |          |           |
|---|-----------|----------|----------|---|-----------|----------|-----------|
| C | -2.784506 | 4.120214 | 1.996527 | H | -0.791754 | 4.563044 | -0.735060 |
| C | -1.452980 | 4.813840 | 0.098285 | C | -2.641727 | 6.468952 | 1.411623  |
| C | -3.135835 | 5.453820 | 2.236501 | H | -3.794694 | 5.699099 | 3.073259  |
| H | -3.161348 | 3.329311 | 2.650158 | H | -1.421358 | 6.932351 | -0.316524 |
| C | -1.802295 | 6.144486 | 0.338166 | H | -2.912749 | 7.510586 | 1.600588  |

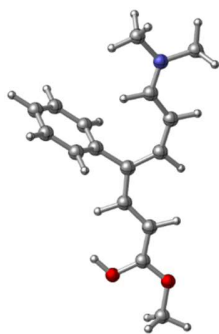

|                                              |                             |
|----------------------------------------------|-----------------------------|
| Zero-point correction=                       | 0.329804 (Hartree/Particle) |
| Thermal correction to Energy=                | 0.349659                    |
| Thermal correction to Enthalpy=              | 0.350603                    |
| Thermal correction to Gibbs Free Energy=     | 0.279311                    |
| Sum of electronic and zero-point Energies=   | -825.849818                 |
| Sum of electronic and thermal Energies=      | -825.829962                 |
| Sum of electronic and thermal Enthalpies=    | -825.829018                 |
| Sum of electronic and thermal Free Energies= | -825.900311                 |

### 3a-OH-p1'

E(scf) = -826.155911126 a.u.

$\nu_{\min} = 43.13 \text{ cm}^{-1}$

|   |           |          |           |   |           |           |           |
|---|-----------|----------|-----------|---|-----------|-----------|-----------|
| C | -1.428226 | 4.500650 | 0.968406  | H | -2.770742 | 5.492232  | -0.349635 |
| C | -1.170423 | 3.370435 | 1.878433  | C | -5.728290 | -0.270340 | 0.033311  |
| C | -1.969548 | 2.278483 | 1.802739  | H | -5.378387 | -1.152151 | 0.583864  |
| H | -1.812461 | 1.433524 | 2.479697  | H | -6.556815 | 0.217737  | 0.563594  |
| C | -2.997270 | 2.180393 | 0.712981  | H | -6.007107 | -0.522122 | -0.993459 |
| H | -2.510766 | 1.932863 | -0.247309 | N | -4.732008 | 4.091713  | 1.244354  |
| C | -2.570684 | 4.613262 | 0.268041  | C | -4.419968 | 4.342172  | 2.638296  |
| C | -4.026781 | 1.147389 | 0.922633  | H | -4.355500 | 3.414414  | 3.247406  |
| O | -4.395442 | 0.715819 | 2.082665  | H | -3.462681 | 4.870097  | 2.736254  |
| O | -4.630020 | 0.683120 | -0.099923 | H | -5.205070 | 4.971065  | 3.085197  |
| C | -3.699331 | 3.611982 | 0.378489  | C | -6.079606 | 3.604522  | 1.008597  |
| H | -4.146347 | 3.470112 | -0.615193 | H | -6.283163 | 2.614994  | 1.472396  |

|   |           |          |           |   |           |          |          |
|---|-----------|----------|-----------|---|-----------|----------|----------|
| H | -6.811607 | 4.306795 | 1.437473  | H | 0.496368  | 1.379820 | 2.741873 |
| H | -6.276626 | 3.525202 | -0.070458 | C | 1.259839  | 4.798962 | 4.422107 |
| H | -0.667621 | 5.280824 | 0.891276  | H | -0.334574 | 5.596016 | 3.213092 |
| C | -0.064866 | 3.470536 | 2.863137  | C | 1.997589  | 3.665391 | 4.779364 |
| C | 0.690985  | 2.338911 | 3.227256  | H | 2.291228  | 1.547716 | 4.438821 |
| C | 0.242174  | 4.704400 | 3.469667  | H | 1.475613  | 5.763200 | 4.888811 |
| C | 1.710366  | 2.435442 | 4.176558  | H | 2.797723  | 3.741116 | 5.519692 |

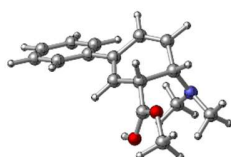

|                                              |                             |
|----------------------------------------------|-----------------------------|
| Zero-point correction=                       | 0.331189 (Hartree/Particle) |
| Thermal correction to Energy=                | 0.349514                    |
| Thermal correction to Enthalpy=              | 0.350458                    |
| Thermal correction to Gibbs Free Energy=     | 0.284743                    |
| Sum of electronic and zero-point Energies=   | -825.824722                 |
| Sum of electronic and thermal Energies=      | -825.806397                 |
| Sum of electronic and thermal Enthalpies=    | -825.805453                 |
| Sum of electronic and thermal Free Energies= | -825.871168                 |

### TS-3a-H-r

E(scf) = -826.125523135 a.u.

$\nu_{\min} = -132.02 \text{ cm}^{-1}$

|   |           |           |           |   |           |           |           |
|---|-----------|-----------|-----------|---|-----------|-----------|-----------|
| C | -0.434502 | 2.333880  | -0.429767 | O | -3.250659 | -1.753329 | -1.368559 |
| C | -1.821048 | 2.622315  | 0.015081  | C | 0.310504  | 1.403319  | 1.695879  |
| C | -2.798828 | 1.619030  | -0.160562 | H | -0.640931 | 1.573625  | 2.201153  |
| H | -0.161427 | 2.581064  | -1.461922 | H | 1.522787  | 1.578758  | -0.065358 |
| H | -3.827967 | 1.823422  | 0.144799  | C | -4.238748 | -2.770528 | -1.551110 |
| C | -2.572075 | 0.367200  | -0.692824 | H | -4.684000 | -3.061241 | -0.587022 |
| H | -1.584629 | 0.048491  | -1.031590 | H | -5.043150 | -2.419299 | -2.215743 |
| C | 0.541791  | 1.752701  | 0.382495  | H | -3.720826 | -3.625313 | -2.002491 |
| C | -3.673579 | -0.596860 | -0.821559 | N | 1.342709  | 0.854161  | 2.589285  |
| O | -4.827881 | -0.402902 | -0.485093 | C | 2.461669  | 0.119061  | 1.909631  |

|   |           |           |          |   |           |          |          |
|---|-----------|-----------|----------|---|-----------|----------|----------|
| H | 3.064663  | -0.370560 | 2.683071 | C | -1.071176 | 4.875133 | 0.779461 |
| H | 2.033627  | -0.625269 | 1.228980 | C | -3.659392 | 5.553321 | 1.576100 |
| H | 3.081150  | 0.834413  | 1.358598 | H | -4.253825 | 3.614095 | 0.896561 |
| C | 1.865730  | 1.919089  | 3.526362 | C | -1.319730 | 6.125422 | 1.340954 |
| H | 2.547281  | 1.449091  | 4.246360 | H | -0.054499 | 4.621088 | 0.473657 |
| H | 2.390400  | 2.671361  | 2.926015 | C | -2.614650 | 6.473856 | 1.744230 |
| H | 1.015039  | 2.374945  | 4.046085 | H | -4.673767 | 5.816067 | 1.885894 |
| C | -2.112197 | 3.926445  | 0.600178 | H | -0.497771 | 6.834594 | 1.465390 |
| C | -3.417489 | 4.303443  | 1.014925 | H | -2.810348 | 7.454131 | 2.185062 |

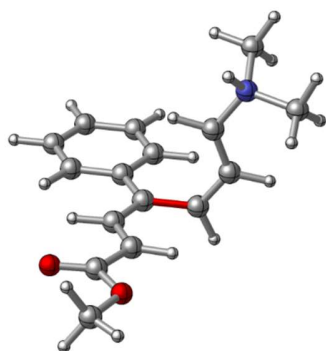

|                                              |                             |
|----------------------------------------------|-----------------------------|
| Zero-point correction=                       | 0.328153 (Hartree/Particle) |
| Thermal correction to Energy=                | 0.347297                    |
| Thermal correction to Enthalpy=              | 0.348241                    |
| Thermal correction to Gibbs Free Energy=     | 0.278984                    |
| Sum of electronic and zero-point Energies=   | -825.797370                 |
| Sum of electronic and thermal Energies=      | -825.778227                 |
| Sum of electronic and thermal Enthalpies=    | -825.777282                 |
| Sum of electronic and thermal Free Energies= | -825.846539                 |

### TS-3a-uu

E(scf) = -826.141145497 a.u.

$\nu_{\min} = -461.34 \text{ cm}^{-1}$

|   |           |          |          |   |           |           |           |
|---|-----------|----------|----------|---|-----------|-----------|-----------|
| C | -1.475648 | 4.685812 | 1.460235 | C | -3.733904 | 4.105369  | 0.541553  |
| C | -1.053997 | 3.468102 | 2.053679 | H | -3.623007 | 3.629552  | -0.425361 |
| C | -1.938927 | 2.379327 | 2.131220 | H | -3.093857 | 6.025537  | 1.254038  |
| H | -1.950017 | 1.787563 | 3.052562 | C | -5.681033 | -0.242253 | 0.578587  |
| C | -2.904344 | 2.102290 | 1.159788 | H | -5.331785 | -1.132904 | 1.120843  |
| H | -2.596550 | 2.112460 | 0.118067 | H | -6.490983 | 0.230533  | 1.154140  |
| C | -2.771869 | 4.994599 | 1.045469 | H | -6.030843 | -0.516069 | -0.423161 |
| C | -4.005231 | 1.156088 | 1.489633 | N | -5.165238 | 4.489258  | 0.773012  |
| O | -4.362270 | 0.878574 | 2.615246 | C | -5.559350 | 4.290918  | 2.211412  |
| O | -4.597113 | 0.680350 | 0.382787 | H | -5.484443 | 3.223938  | 2.450983  |

|   |           |          |           |   |          |          |          |
|---|-----------|----------|-----------|---|----------|----------|----------|
| H | -4.868503 | 4.859647 | 2.843873  | C | 0.708234 | 4.562024 | 3.526205 |
| H | -6.586115 | 4.650326 | 2.347477  | C | 2.079858 | 2.133738 | 3.713201 |
| C | -6.089182 | 3.775512 | -0.166988 | H | 0.532713 | 1.333035 | 2.440489 |
| H | -5.937323 | 2.697448 | -0.044846 | C | 1.886047 | 4.479078 | 4.270845 |
| H | -7.122749 | 4.050413 | 0.071615  | H | 0.168905 | 5.510731 | 3.492668 |
| H | -5.844677 | 4.073126 | -1.193362 | C | 2.577408 | 3.265790 | 4.366534 |
| H | -0.815413 | 5.543925 | 1.609022  | H | 2.614689 | 1.183053 | 3.777662 |
| C | 0.196760  | 3.431712 | 2.857317  | H | 2.260593 | 5.365260 | 4.788973 |
| C | 0.902232  | 2.216218 | 2.966964  | H | 3.499404 | 3.203679 | 4.949693 |

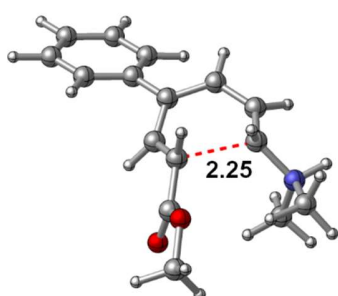

Zero-point correction= 0.331492 (Hartree/Particle)  
 Thermal correction to Energy= 0.349737  
 Thermal correction to Enthalpy= 0.350681  
 Thermal correction to Gibbs Free Energy= 0.284361  
 Sum of electronic and zero-point Energies= -825.809654  
 Sum of electronic and thermal Energies= -825.791409  
 Sum of electronic and thermal Enthalpies= -825.790464  
 Sum of electronic and thermal Free Energies= -825.856784

### TS-3a-OH-r'

E(scf)=-826.160268552 a.u.

$\nu_{\min} = -51.81 \text{ cm}^{-1}$

|   |           |           |           |   |           |           |           |
|---|-----------|-----------|-----------|---|-----------|-----------|-----------|
| C | -0.347471 | 3.008542  | -0.402235 | H | -0.286280 | 3.114006  | 2.204415  |
| C | -1.724816 | 3.196185  | 0.125307  | H | 1.748686  | 2.803897  | -0.160688 |
| C | -2.500261 | 2.081484  | 0.298695  | C | -3.314776 | -2.716775 | 0.124653  |
| H | -0.237521 | 2.907535  | -1.490452 | H | -3.710803 | -2.815871 | 1.146397  |
| H | -3.512549 | 2.249816  | 0.680925  | H | -4.153965 | -2.643502 | -0.583497 |
| C | -2.109069 | 0.726830  | 0.056135  | H | -2.693258 | -3.585918 | -0.120900 |
| H | -1.097380 | 0.494356  | -0.278534 | N | 1.704127  | 3.047002  | 2.613996  |
| C | 0.788552  | 2.938155  | 0.337953  | C | 3.121097  | 2.965782  | 2.245784  |
| C | -2.928876 | -0.360272 | 0.230698  | H | 3.544050  | 2.042293  | 2.667382  |
| O | -4.209502 | -0.345227 | 0.612390  | H | 3.256548  | 2.970089  | 1.161470  |
| O | -2.449206 | -1.580747 | 0.015997  | H | 3.645690  | 3.827856  | 2.681586  |
| C | 0.714909  | 3.039058  | 1.767624  | C | 1.456436  | 3.137032  | 4.058321  |



|   |           |          |          |   |           |          |          |
|---|-----------|----------|----------|---|-----------|----------|----------|
| H | 1.888808  | 2.254398 | 4.551658 | H | -4.313412 | 4.096056 | 0.452630 |
| H | 1.945848  | 4.039946 | 4.451424 | C | -1.713704 | 6.961159 | 0.721439 |
| H | 0.379617  | 3.182378 | 4.255911 | H | -0.211685 | 5.483922 | 0.323706 |
| C | -2.190504 | 4.579987 | 0.380231 | C | -3.071121 | 7.233862 | 0.904133 |
| C | -3.562959 | 4.882910 | 0.546009 | H | -5.060479 | 6.377639 | 0.935673 |
| C | -1.279631 | 5.657747 | 0.461583 | H | -0.978808 | 7.768258 | 0.779847 |
| C | -3.992268 | 6.181809 | 0.811017 | H | -3.411463 | 8.252056 | 1.106655 |

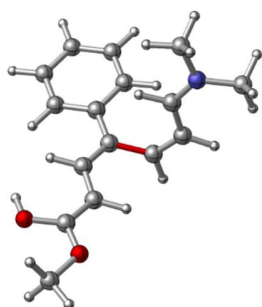

|                                              |                             |
|----------------------------------------------|-----------------------------|
| Zero-point correction=                       | 0.328820 (Hartree/Particle) |
| Thermal correction to Energy=                | 0.348145                    |
| Thermal correction to Enthalpy=              | 0.349089                    |
| Thermal correction to Gibbs Free Energy=     | 0.279007                    |
| Sum of electronic and zero-point Energies=   | -825.831449                 |
| Sum of electronic and thermal Energies=      | -825.812123                 |
| Sum of electronic and thermal Enthalpies=    | -825.811179                 |
| Sum of electronic and thermal Free Energies= | -825.881261                 |

### 3a-OH-uu'

E(scf) = -826.149706076 a.u.

$\nu_{\min} = -307.35 \text{ cm}^{-1}$

|   |           |          |           |   |           |           |           |
|---|-----------|----------|-----------|---|-----------|-----------|-----------|
| C | -1.410479 | 4.391634 | 0.930068  | H | -2.750047 | 5.513512  | -0.268308 |
| C | -1.131636 | 3.269447 | 1.840314  | C | -5.733195 | -0.222165 | -0.101876 |
| C | -1.896159 | 2.147435 | 1.769402  | H | -5.464166 | -1.159402 | 0.402954  |
| H | -1.759256 | 1.360121 | 2.519653  | H | -6.516898 | 0.299789  | 0.465379  |
| C | -2.873745 | 1.954270 | 0.688554  | H | -6.062293 | -0.413579 | -1.128000 |
| H | -2.482058 | 1.992298 | -0.334129 | N | -4.752900 | 4.067847  | 1.341893  |
| C | -2.593691 | 4.605233 | 0.323901  | C | -4.435762 | 4.619765  | 2.653592  |
| C | -3.922527 | 1.022625 | 0.829705  | H | -4.479057 | 3.832294  | 3.426267  |
| O | -4.379963 | 0.577554 | 1.978186  | H | -3.433614 | 5.061558  | 2.653596  |
| O | -4.568301 | 0.626326 | -0.228130 | H | -5.169617 | 5.397876  | 2.912693  |
| C | -3.807749 | 3.740262 | 0.435456  | C | -6.100542 | 3.527729  | 1.206745  |
| H | -4.233226 | 3.441481 | -0.527685 | H | -6.245364 | 2.656703  | 1.869383  |

|   |           |          |          |   |           |          |          |
|---|-----------|----------|----------|---|-----------|----------|----------|
| H | -6.839080 | 4.293838 | 1.487106 | H | 0.552248  | 1.341322 | 2.801637 |
| H | -6.286268 | 3.224056 | 0.168204 | C | 1.215055  | 4.822256 | 4.393863 |
| H | -0.620041 | 5.132773 | 0.787070 | H | -0.365658 | 5.553442 | 3.128074 |
| C | -0.052128 | 3.423053 | 2.846335 | C | 1.963268  | 3.713694 | 4.804225 |
| C | 0.716579  | 2.317714 | 3.263118 | H | 2.299352  | 1.591921 | 4.536638 |
| C | 0.220578  | 4.679886 | 3.423142 | H | 1.403538  | 5.804419 | 4.834460 |
| C | 1.710193  | 2.461113 | 4.233664 | H | 2.744473  | 3.826346 | 5.559910 |

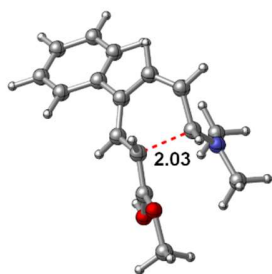

|                                              |                             |
|----------------------------------------------|-----------------------------|
| Zero-point correction=                       | 0.329782 (Hartree/Particle) |
| Thermal correction to Energy=                | 0.348140                    |
| Thermal correction to Enthalpy=              | 0.349084                    |
| Thermal correction to Gibbs Free Energy=     | 0.283185                    |
| Sum of electronic and zero-point Energies=   | -825.819924                 |
| Sum of electronic and thermal Energies=      | -825.801566                 |
| Sum of electronic and thermal Enthalpies=    | -825.800622                 |
| Sum of electronic and thermal Free Energies= | -825.866521                 |

### 3b-H

E(scf) = -826.180724363 a.u.

$\nu_{\min} = 25.09 \text{ cm}^{-1}$

|   |           |          |           |   |           |          |          |
|---|-----------|----------|-----------|---|-----------|----------|----------|
| C | 0.332391  | 2.414253 | -0.693750 | C | -1.953744 | 1.775272 | 0.088560 |
| C | -1.024131 | 2.357082 | -0.849714 | H | -1.561597 | 1.300354 | 0.992724 |

|   |           |           |           |   |           |           |           |
|---|-----------|-----------|-----------|---|-----------|-----------|-----------|
| C | -3.293738 | 1.777918  | -0.091249 | H | 3.222451  | 4.502675  | -4.800937 |
| H | -3.759731 | 2.237459  | -0.966659 | C | 3.855459  | 5.137328  | -2.275290 |
| C | 1.120692  | 3.014896  | -1.769242 | H | 4.526443  | 5.532677  | -3.047337 |
| C | -4.190919 | 1.152805  | 0.905834  | H | 3.049780  | 5.848175  | -2.058170 |
| O | -3.834174 | 0.605482  | 1.930011  | H | 4.418260  | 4.911599  | -1.362189 |
| O | -5.477618 | 1.265791  | 0.535794  | H | -1.456083 | 2.773579  | -1.766262 |
| C | 2.446320  | 3.211271  | -1.719133 | C | 1.021804  | 1.920399  | 0.534011  |
| H | 3.068115  | 2.935532  | -0.866986 | C | 0.771571  | 2.520792  | 1.780377  |
| H | 0.550208  | 3.324210  | -2.647588 | C | 1.933015  | 0.850786  | 0.465166  |
| C | -6.449521 | 0.699219  | 1.420302  | C | 1.414304  | 2.059456  | 2.932654  |
| H | -6.282799 | -0.382154 | 1.540687  | H | 0.070705  | 3.356634  | 1.841729  |
| H | -6.397910 | 1.175074  | 2.411576  | C | 2.571439  | 0.388234  | 1.618814  |
| H | -7.427704 | 0.883966  | 0.960698  | H | 2.131716  | 0.372066  | -0.496851 |
| N | 3.228493  | 3.863692  | -2.787437 | C | 2.314745  | 0.992102  | 2.854939  |
| C | 2.505437  | 4.094861  | -4.079681 | H | 1.210280  | 2.536707  | 3.894222  |
| H | 2.106381  | 3.141101  | -4.442062 | H | 3.269088  | -0.450223 | 1.552703  |
| H | 1.697369  | 4.815494  | -3.912164 | H | 2.815591  | 0.630422  | 3.756242  |

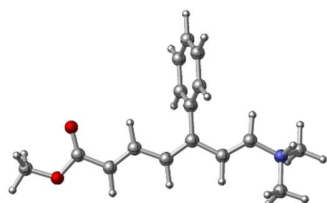

|                                              |                             |
|----------------------------------------------|-----------------------------|
| Zero-point correction=                       | 0.332100 (Hartree/Particle) |
| Thermal correction to Energy=                | 0.351548                    |
| Thermal correction to Enthalpy=              | 0.352492                    |
| Thermal correction to Gibbs Free Energy=     | 0.281583                    |
| Sum of electronic and zero-point Energies=   | -825.848624                 |
| Sum of electronic and thermal Energies=      | -825.829177                 |
| Sum of electronic and thermal Enthalpies=    | -825.828232                 |
| Sum of electronic and thermal Free Energies= | -825.899141                 |

### 3b-H-aii

E(scf) = -826.172613092 a.u.

$\nu_{\min} = 25.06 \text{ cm}^{-1}$

|   |           |          |          |   |           |          |          |
|---|-----------|----------|----------|---|-----------|----------|----------|
| C | -0.828043 | 4.762772 | 1.789883 | C | -0.228275 | 3.544576 | 1.669800 |
|---|-----------|----------|----------|---|-----------|----------|----------|

|   |           |           |          |   |           |          |           |
|---|-----------|-----------|----------|---|-----------|----------|-----------|
| C | -0.810890 | 2.222600  | 1.869980 | H | -5.281110 | 4.774830 | -0.481637 |
| H | -0.395412 | 1.414054  | 1.256814 | H | -6.452164 | 5.315794 | 0.774038  |
| C | -1.775681 | 1.887138  | 2.751162 | C | -5.223559 | 3.104404 | 1.702011  |
| H | -2.208397 | 2.614072  | 3.440203 | H | -6.273336 | 3.205094 | 2.002291  |
| C | -2.284545 | 4.900849  | 2.039713 | H | -5.152960 | 2.574917 | 0.744264  |
| C | -2.336810 | 0.521543  | 2.793905 | H | -4.650961 | 2.569859 | 2.469510  |
| O | -1.912756 | -0.448900 | 2.202613 | H | 0.821240  | 3.536174 | 1.359809  |
| O | -3.441407 | 0.492036  | 3.569733 | C | -0.070726 | 6.032828 | 1.666950  |
| C | -3.208730 | 4.412710  | 1.214946 | C | 1.294850  | 6.112801 | 2.011999  |
| H | -2.990856 | 3.875785  | 0.289960 | C | -0.712179 | 7.200841 | 1.206451  |
| H | -2.586752 | 5.455822  | 2.937389 | C | 1.995218  | 7.311757 | 1.879475  |
| C | -4.109535 | -0.769679 | 3.683365 | H | 1.807156  | 5.235342 | 2.411916  |
| H | -4.447113 | -1.121293 | 2.696545 | C | -0.009018 | 8.400440 | 1.074056  |
| H | -3.437475 | -1.525965 | 4.116094 | H | -1.768208 | 7.166736 | 0.929226  |
| H | -4.969286 | -0.603190 | 4.343033 | C | 1.347608  | 8.460397 | 1.407800  |
| N | -4.643497 | 4.484195  | 1.521273 | H | 3.051063  | 7.353754 | 2.157739  |
| C | -5.394301 | 5.276968  | 0.486822 | H | -0.523573 | 9.291626 | 0.706587  |
| H | -4.966200 | 6.285082  | 0.445970 | H | 1.897486  | 9.399406 | 1.308788  |

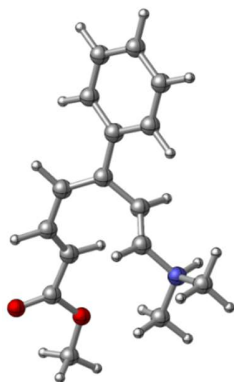

Zero-point correction= 0.331139 (Hartree/Particle)  
 Thermal correction to Energy= 0.350753  
 Thermal correction to Enthalpy= 0.351697  
 Thermal correction to Gibbs Free Energy= 0.280886  
 Sum of electronic and zero-point Energies= -825.841474  
 Sum of electronic and thermal Energies= -825.821860  
 Sum of electronic and thermal Enthalpies= -825.820916  
 Sum of electronic and thermal Free Energies= -825.891728

**3b-H-int**

E(scf) = -826.171415585 a.u.

 $\nu_{\min} = 27.03 \text{ cm}^{-1}$ 

|   |           |           |           |   |           |          |           |
|---|-----------|-----------|-----------|---|-----------|----------|-----------|
| C | -2.279705 | 4.324355  | 1.223813  | H | -5.098865 | 5.179150 | -2.181811 |
| C | -2.423652 | 2.983933  | 1.018054  | H | -6.563217 | 4.588018 | -1.317077 |
| C | -1.708860 | 1.873475  | 1.633082  | H | -6.547224 | 6.242074 | -2.026630 |
| H | -1.730018 | 0.929300  | 1.077227  | C | -6.494214 | 6.481055 | 0.667532  |
| C | -1.091226 | 1.848992  | 2.833321  | H | -7.099440 | 7.228330 | 0.140197  |
| H | -1.041882 | 2.719092  | 3.488892  | H | -7.111482 | 5.616795 | 0.941123  |
| C | -3.219592 | 5.272990  | 0.601853  | H | -6.032435 | 6.917700 | 1.560330  |
| C | -0.451495 | 0.605915  | 3.321594  | H | -3.173217 | 2.675970 | 0.281944  |
| O | -0.405020 | -0.450762 | 2.724511  | C | -1.184213 | 4.950652 | 2.017365  |
| O | 0.087976  | 0.792186  | 4.538540  | C | 0.163862  | 4.666829 | 1.732345  |
| C | -4.522997 | 5.035112  | 0.414741  | C | -1.484511 | 5.869515 | 3.037915  |
| H | -5.047554 | 4.132146  | 0.730923  | C | 1.184966  | 5.271724 | 2.465862  |
| H | -2.806460 | 6.247519  | 0.313717  | H | 0.405244  | 3.963819 | 0.932248  |
| C | 0.742739  | -0.335753 | 5.127182  | C | -0.460367 | 6.468426 | 3.778444  |
| H | 0.039341  | -1.173327 | 5.251402  | H | -2.528039 | 6.103791 | 3.264348  |
| H | 1.580878  | -0.671539 | 4.497492  | C | 0.875953  | 6.169795 | 3.495427  |
| H | 1.111892  | -0.001460 | 6.104026  | H | 2.227925  | 5.044063 | 2.232249  |
| N | -5.398710 | 6.009565  | -0.250507 | H | -0.708402 | 7.170900 | 4.577874  |
| C | -5.943329 | 5.463884  | -1.543991 | H | 1.676877  | 6.639952 | 4.071217  |

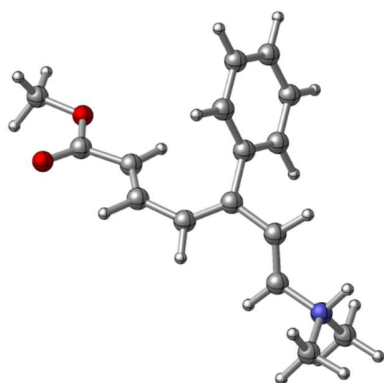

Zero-point correction= 0.331591 (Hartree/Particle)  
Thermal correction to Energy= 0.351162  
Thermal correction to Enthalpy= 0.352106  
Thermal correction to Gibbs Free Energy= 0.281454

Sum of electronic and zero-point Energies= -825.839825  
 Sum of electronic and thermal Energies= -825.820253  
 Sum of electronic and thermal Enthalpies= -825.819309  
 Sum of electronic and thermal Free Energies= -825.889962

### 3b-H-p1

E(scf) = -826.201947898 a.u.

$\nu_{\min} = 38.99 \text{ cm}^{-1}$

|   |           |           |           |   |           |          |           |
|---|-----------|-----------|-----------|---|-----------|----------|-----------|
| C | -1.548042 | 4.666207  | 1.249676  | H | -4.812717 | 3.338393 | 2.973126  |
| C | -1.474174 | 3.568962  | 2.231554  | H | -3.879811 | 4.870573 | 2.818085  |
| C | -2.253673 | 2.482116  | 2.116393  | H | -5.671518 | 4.918474 | 2.934476  |
| H | -2.203508 | 1.660590  | 2.833043  | C | -6.221772 | 3.651138 | 0.652050  |
| C | -3.158487 | 2.324973  | 0.924486  | H | -6.345587 | 2.687795 | 1.155510  |
| H | -2.531600 | 1.939060  | 0.097700  | H | -7.031207 | 4.322572 | 0.962640  |
| C | -2.578675 | 4.704902  | 0.366121  | H | -6.234422 | 3.523573 | -0.436073 |
| C | -4.254370 | 1.286473  | 1.121287  | H | -0.752482 | 3.640138 | 3.046515  |
| O | -4.671984 | 0.920023  | 2.196000  | C | -0.499488 | 5.718157 | 1.255942  |
| O | -4.718091 | 0.857948  | -0.052262 | C | 0.042067  | 6.191111 | 2.466890  |
| C | -3.663605 | 3.665374  | 0.354208  | C | -0.034793 | 6.276080 | 0.048920  |
| H | -4.022057 | 3.496066  | -0.668692 | C | 1.002935  | 7.205172 | 2.470091  |
| H | -2.688454 | 5.539935  | -0.329953 | H | -0.306459 | 5.785793 | 3.419173  |
| C | -5.774864 | -0.117722 | -0.024375 | C | 0.931274  | 7.283932 | 0.053668  |
| H | -5.449070 | -1.016701 | 0.517646  | H | -0.415959 | 5.898287 | -0.902416 |
| H | -6.667545 | 0.294846  | 0.469061  | C | 1.451778  | 7.754433 | 1.264511  |
| H | -5.993249 | -0.355552 | -1.071145 | H | 1.401995  | 7.568166 | 3.420323  |
| N | -4.917831 | 4.265047  | 1.067412  | H | 1.286191  | 7.697559 | -0.893439 |
| C | -4.809153 | 4.353183  | 2.560591  | H | 2.209028  | 8.542176 | 1.267931  |

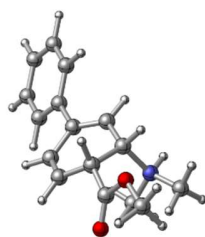

Zero-point correction= 0.335033 (Hartree/Particle)  
 Thermal correction to Energy= 0.352931  
 Thermal correction to Enthalpy= 0.353875  
 Thermal correction to Gibbs Free Energy= 0.288798  
 Sum of electronic and zero-point Energies= -825.866915

Sum of electronic and thermal Energies= -825.849017  
 Sum of electronic and thermal Enthalpies= -825.848073  
 Sum of electronic and thermal Free Energies= -825.913150

### 3b-OH'

E(scf) = -826.190169381 a.u.

$\nu_{\min} = 33.25 \text{ cm}^{-1}$

|   |           |           |           |   |           |           |           |
|---|-----------|-----------|-----------|---|-----------|-----------|-----------|
| C | 0.214746  | 2.655577  | -0.721687 | H | 2.020445  | 3.601694  | -4.392702 |
| C | -1.188385 | 2.523146  | -0.844714 | H | 1.724544  | 5.263367  | -3.794829 |
| C | -2.008696 | 1.849038  | 0.052053  | H | 3.283258  | 4.852471  | -4.564959 |
| H | -1.515011 | 1.379072  | 0.910624  | C | 4.468010  | 4.404497  | -2.400960 |
| C | -3.398435 | 1.724091  | -0.075574 | H | 5.084160  | 3.876741  | -3.145887 |
| H | -3.920098 | 2.175365  | -0.921130 | H | 4.648585  | 5.486636  | -2.500342 |
| C | 0.946725  | 3.267251  | -1.756567 | H | 4.768795  | 4.083817  | -1.395830 |
| C | -4.206634 | 1.038899  | 0.828824  | H | -1.656935 | 2.968421  | -1.728348 |
| O | -3.812479 | 0.425281  | 1.931041  | C | 0.909073  | 2.143969  | 0.496661  |
| O | -5.495711 | 0.975817  | 0.597886  | C | 0.630457  | 2.692726  | 1.761646  |
| C | 2.313364  | 3.550266  | -1.670508 | C | 1.849445  | 1.102503  | 0.397750  |
| H | 2.846693  | 3.310814  | -0.747254 | C | 1.282468  | 2.213080  | 2.900615  |
| H | 0.394864  | 3.560926  | -2.651326 | H | -0.093290 | 3.506548  | 1.846298  |
| C | -6.364610 | 0.285043  | 1.515386  | C | 2.492098  | 0.617580  | 1.539964  |
| H | -6.084936 | -0.775842 | 1.583843  | H | 2.065848  | 0.665412  | -0.579793 |
| H | -6.315187 | 0.746227  | 2.511993  | C | 2.212115  | 1.172893  | 2.793114  |
| H | -7.371163 | 0.388134  | 1.096156  | H | 1.064033  | 2.655066  | 3.875757  |
| N | 3.055029  | 4.108992  | -2.618512 | H | 3.213530  | -0.198104 | 1.449895  |
| C | 2.486193  | 4.476353  | -3.913562 | H | 2.718195  | 0.795827  | 3.685127  |

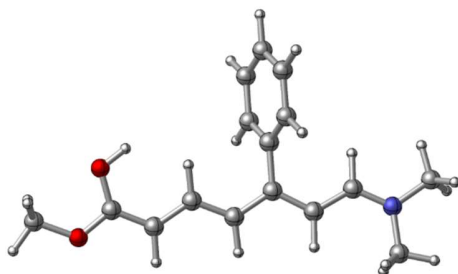

Zero-point correction= 0.329828 (Hartree/Particle)  
 Thermal correction to Energy= 0.349583

|                                              |             |
|----------------------------------------------|-------------|
| Thermal correction to Enthalpy=              | 0.350527    |
| Thermal correction to Gibbs Free Energy=     | 0.279930    |
| Sum of electronic and zero-point Energies=   | -825.860341 |
| Sum of electronic and thermal Energies=      | -825.840586 |
| Sum of electronic and thermal Enthalpies=    | -825.839642 |
| Sum of electronic and thermal Free Energies= | -825.910240 |

### 3b-OH-aii'

E(scf) = -826.177479145 a.u.

$\nu_{\min} = 29.15 \text{ cm}^{-1}$

|   |           |           |          |   |           |          |          |
|---|-----------|-----------|----------|---|-----------|----------|----------|
| C | -0.995445 | 4.896648  | 1.327035 | H | -4.684618 | 5.413233 | 3.055454 |
| C | -0.378009 | 3.615300  | 1.139893 | H | -5.176639 | 6.241907 | 1.544905 |
| C | -0.704090 | 2.386430  | 1.701285 | H | -6.270028 | 5.054728 | 2.312823 |
| H | -0.036539 | 1.579253  | 1.371669 | C | -5.543223 | 3.226330 | 0.743296 |
| C | -1.660814 | 2.046053  | 2.681006 | H | -6.117191 | 2.734967 | 1.543728 |
| H | -2.323957 | 2.795533  | 3.111047 | H | -6.248322 | 3.724912 | 0.059699 |
| C | -2.375052 | 5.095031  | 1.503773 | H | -4.978131 | 2.468802 | 0.186590 |
| C | -1.810310 | 0.772137  | 3.205912 | H | 0.547526  | 3.624880 | 0.558467 |
| O | -1.159152 | -0.323906 | 2.843365 | C | -0.109833 | 6.085781 | 1.315844 |
| O | -2.694077 | 0.585260  | 4.164521 | C | 1.210819  | 6.001056 | 1.805401 |
| C | -3.326588 | 4.147439  | 1.101919 | C | -0.563102 | 7.327173 | 0.820291 |
| H | -2.988405 | 3.275641  | 0.535830 | C | 2.044819  | 7.119724 | 1.807332 |
| H | -2.715506 | 6.058171  | 1.885025 | H | 1.573986  | 5.055994 | 2.214295 |
| C | -2.887832 | -0.725521 | 4.722694 | C | 0.274860  | 8.442316 | 0.815383 |
| H | -3.216067 | -1.432300 | 3.946949 | H | -1.569700 | 7.409650 | 0.405230 |
| H | -1.959343 | -1.091176 | 5.184288 | C | 1.580362  | 8.343229 | 1.311272 |
| H | -3.667850 | -0.606772 | 5.482793 | H | 3.060075  | 7.038378 | 2.202697 |
| N | -4.628165 | 4.208363  | 1.320719 | H | -0.088778 | 9.391753 | 0.415321 |
| C | -5.220971 | 5.293143  | 2.103242 | H | 2.235104  | 9.218081 | 1.309284 |



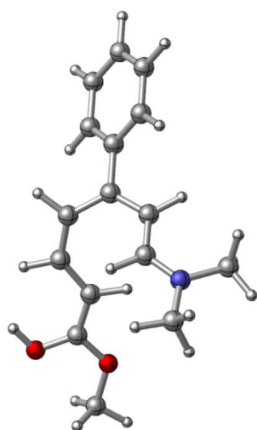

|                                              |                             |
|----------------------------------------------|-----------------------------|
| Zero-point correction=                       | 0.329980 (Hartree/Particle) |
| Thermal correction to Energy=                | 0.349619                    |
| Thermal correction to Enthalpy=              | 0.350563                    |
| Thermal correction to Gibbs Free Energy=     | 0.280402                    |
| Sum of electronic and zero-point Energies=   | -825.847499                 |
| Sum of electronic and thermal Energies=      | -825.827860                 |
| Sum of electronic and thermal Enthalpies=    | -825.826916                 |
| Sum of electronic and thermal Free Energies= | -825.897077                 |

### 3b-OH-int'

E(scf) = -826.179928102 a.u.

$\nu_{\min} = 23.16 \text{ cm}^{-1}$

|   |           |          |          |   |           |           |          |
|---|-----------|----------|----------|---|-----------|-----------|----------|
| C | -2.231001 | 4.304843 | 1.258038 | H | -0.594605 | 3.182484  | 3.575930 |
| C | -2.190905 | 2.883299 | 1.183787 | C | -3.261578 | 5.077825  | 0.687847 |
| C | -1.486307 | 1.984971 | 1.982679 | C | -0.080373 | 1.169741  | 3.833185 |
| H | -1.617820 | 0.942197 | 1.664807 | O | -0.039670 | -0.110980 | 3.502955 |
| C | -0.714971 | 2.193702 | 3.138848 | O | 0.560010  | 1.467226  | 4.941002 |

|   |           |           |           |   |           |          |           |
|---|-----------|-----------|-----------|---|-----------|----------|-----------|
| C | -4.462630 | 4.549008  | 0.198376  | H | -6.848024 | 4.740827 | -1.864967 |
| H | -4.663491 | 3.480190  | 0.307943  | H | -6.650054 | 3.528421 | -0.561455 |
| H | -3.112668 | 6.157510  | 0.660611  | H | -2.826506 | 2.415251 | 0.429207  |
| C | 1.248651  | 0.441128  | 5.678097  | C | -1.125470 | 5.064888 | 1.901511  |
| H | 0.541174  | -0.326569 | 6.022605  | C | 0.212211  | 4.813019 | 1.541442  |
| H | 2.025400  | -0.025356 | 5.055472  | C | -1.398488 | 6.068770 | 2.848534  |
| H | 1.702308  | 0.952092  | 6.534244  | C | 1.249908  | 5.544259 | 2.118787  |
| N | -5.432128 | 5.238162  | -0.384799 | H | 0.429627  | 4.039018 | 0.802474  |
| C | -5.313853 | 6.677400  | -0.615364 | C | -0.355738 | 6.786715 | 3.440461  |
| H | -5.290183 | 7.222972  | 0.341379  | H | -2.432744 | 6.267966 | 3.138526  |
| H | -4.394395 | 6.902005  | -1.176097 | C | 0.969626  | 6.528003 | 3.075736  |
| H | -6.176591 | 7.020924  | -1.197241 | H | 2.282972  | 5.346158 | 1.823115  |
| C | -6.684224 | 4.601775  | -0.785119 | H | -0.579850 | 7.551007 | 4.188438  |
| H | -7.527965 | 5.054961  | -0.241064 | H | 1.784324  | 7.093640 | 3.534401  |

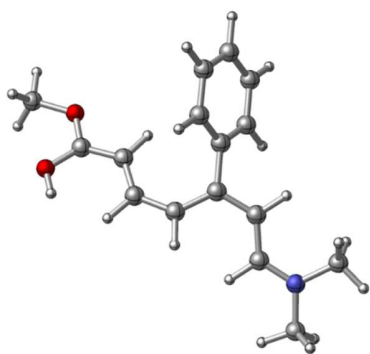

|                                              |                             |
|----------------------------------------------|-----------------------------|
| Zero-point correction=                       | 0.329591 (Hartree/Particle) |
| Thermal correction to Energy=                | 0.349466                    |
| Thermal correction to Enthalpy=              | 0.350410                    |
| Thermal correction to Gibbs Free Energy=     | 0.278964                    |
| Sum of electronic and zero-point Energies=   | -825.850337                 |
| Sum of electronic and thermal Energies=      | -825.830462                 |
| Sum of electronic and thermal Enthalpies=    | -825.829518                 |
| Sum of electronic and thermal Free Energies= | -825.900964                 |

### 3b-OH-p1'

E(scf) = -826.154802508a.u.

$\nu_{\min} = 32.34 \text{ cm}^{-1}$

|   |           |          |           |   |           |          |           |
|---|-----------|----------|-----------|---|-----------|----------|-----------|
| C | -1.675113 | 4.305861 | 0.236390  | H | -1.312150 | 0.930306 | -0.444398 |
| C | -1.084074 | 3.019681 | -0.171756 | C | -3.161018 | 1.871074 | 0.457299  |
| C | -1.779910 | 1.869941 | -0.135268 | H | -3.092169 | 1.892343 | 1.559134  |

|   |           |           |           |   |           |          |           |
|---|-----------|-----------|-----------|---|-----------|----------|-----------|
| C | -3.016600 | 4.388530  | 0.406049  | C | -5.914798 | 2.813795 | -1.315864 |
| C | -3.986661 | 0.696111  | 0.127010  | H | -5.900658 | 1.730039 | -1.562719 |
| O | -3.846874 | -0.012640 | -0.943558 | H | -6.513858 | 2.950211 | -0.403713 |
| O | -4.931998 | 0.382248  | 0.922102  | H | -6.438350 | 3.315442 | -2.144973 |
| C | -3.969225 | 3.245461  | 0.134652  | H | -0.054035 | 3.015372 | -0.534420 |
| H | -4.769677 | 3.270520  | 0.886700  | C | -0.780471 | 5.481220 | 0.408604  |
| H | -3.494114 | 5.335921  | 0.665490  | C | -1.198660 | 6.775026 | 0.042383  |
| C | -5.846350 | -0.715706 | 0.617825  | C | 0.509589  | 5.323853 | 0.950393  |
| H | -6.391093 | -0.477925 | -0.305442 | C | -0.359453 | 7.876172 | 0.224491  |
| H | -5.271000 | -1.642655 | 0.503125  | H | -2.182184 | 6.916592 | -0.411387 |
| H | -6.520850 | -0.765185 | 1.476807  | C | 1.348031  | 6.426404 | 1.135281  |
| N | -4.593287 | 3.390710  | -1.145953 | H | 0.856367  | 4.332182 | 1.251199  |
| C | -3.767505 | 3.365227  | -2.336865 | C | 0.916833  | 7.706800 | 0.773423  |
| H | -3.447791 | 2.340676  | -2.628411 | H | -0.700068 | 8.870921 | -0.073567 |
| H | -4.329401 | 3.783204  | -3.186149 | H | 2.342024  | 6.283835 | 1.566510  |
| H | -2.861379 | 3.968618  | -2.196395 | H | 1.574219  | 8.568475 | 0.912967  |

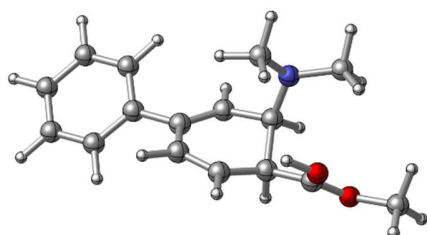

|                                              |                             |
|----------------------------------------------|-----------------------------|
| Zero-point correction=                       | 0.331013 (Hartree/Particle) |
| Thermal correction to Energy=                | 0.349411                    |
| Thermal correction to Enthalpy=              | 0.350355                    |
| Thermal correction to Gibbs Free Energy=     | 0.284292                    |
| Sum of electronic and zero-point Energies=   | -825.823790                 |
| Sum of electronic and thermal Energies=      | -825.805392                 |
| Sum of electronic and thermal Enthalpies=    | -825.804447                 |
| Sum of electronic and thermal Free Energies= | -825.870511                 |

### TS-3b-H-r

E(scf) = -826.128660070 a.u.

$\nu_{\min} = -129.7 \text{ cm}^{-1}$

|   |           |          |          |   |           |          |          |
|---|-----------|----------|----------|---|-----------|----------|----------|
| C | -1.549431 | 4.874941 | 1.103530 | C | -1.223326 | 3.591111 | 0.433038 |
|---|-----------|----------|----------|---|-----------|----------|----------|

|   |           |           |           |   |           |          |           |
|---|-----------|-----------|-----------|---|-----------|----------|-----------|
| C | -1.220695 | 2.359343  | 1.069616  | H | -5.932033 | 4.317911 | -1.246367 |
| H | -0.978402 | 1.469015  | 0.480852  | H | -6.910215 | 5.695606 | -0.625387 |
| C | -1.510221 | 2.164218  | 2.419655  | C | -6.187470 | 4.175685 | 1.482948  |
| H | -1.758505 | 3.001762  | 3.075296  | H | -7.193547 | 4.609737 | 1.534896  |
| C | -2.906212 | 5.296204  | 1.102523  | H | -6.224421 | 3.186671 | 1.010851  |
| C | -1.490240 | 0.819209  | 3.007516  | H | -5.743993 | 4.103942 | 2.482543  |
| O | -1.235006 | -0.208331 | 2.405926  | H | -0.991403 | 3.627252 | -0.638448 |
| O | -1.795551 | 0.851900  | 4.318591  | C | -0.486612 | 5.651786 | 1.721137  |
| C | -3.937692 | 4.574037  | 0.576020  | C | 0.846939  | 5.161124 | 1.707404  |
| H | -3.847549 | 3.597747  | 0.099034  | C | -0.714571 | 6.903277 | 2.356086  |
| H | -3.148296 | 6.256981  | 1.565725  | C | 1.887066  | 5.877065 | 2.293641  |
| C | -1.803933 | -0.404413 | 5.001921  | H | 1.059456  | 4.202015 | 1.232187  |
| H | -2.541687 | -1.087977 | 4.553978  | C | 0.329183  | 7.613322 | 2.939986  |
| H | -0.812381 | -0.880613 | 4.955517  | H | -1.716840 | 7.331325 | 2.397311  |
| H | -2.071408 | -0.186612 | 6.042822  | C | 1.637214  | 7.107516 | 2.914496  |
| N | -5.316550 | 5.070924  | 0.640757  | H | 2.901806  | 5.472863 | 2.267722  |
| C | -5.898393 | 5.285519  | -0.731274 | H | 0.123867  | 8.572302 | 3.421726  |
| H | -5.252879 | 5.984097  | -1.275434 | H | 2.453257  | 7.668931 | 3.375272  |

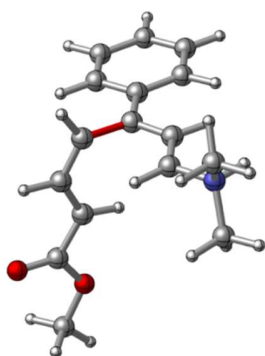

|                                              |                             |
|----------------------------------------------|-----------------------------|
| Zero-point correction=                       | 0.327867 (Hartree/Particle) |
| Thermal correction to Energy=                | 0.347094                    |
| Thermal correction to Enthalpy=              | 0.348038                    |
| Thermal correction to Gibbs Free Energy=     | 0.278394                    |
| Sum of electronic and zero-point Energies=   | -825.800793                 |
| Sum of electronic and thermal Energies=      | -825.781566                 |
| Sum of electronic and thermal Enthalpies=    | -825.780622                 |
| Sum of electronic and thermal Free Energies= | -825.850266                 |

### TS-3b-H-uu

E(scf) = -826.140727266 a.u.

$\nu_{\min} = -464.38 \text{ cm}^{-1}$

|   |           |          |          |   |           |          |          |
|---|-----------|----------|----------|---|-----------|----------|----------|
| C | -1.353401 | 4.564919 | 1.216503 | C | -1.040355 | 3.291752 | 1.756961 |
|---|-----------|----------|----------|---|-----------|----------|----------|

|   |           |           |           |   |           |          |           |
|---|-----------|-----------|-----------|---|-----------|----------|-----------|
| C | -1.943536 | 2.248399  | 1.914730  | H | -4.716652 | 4.940939 | 2.713834  |
| H | -1.861837 | 1.631196  | 2.817001  | H | -6.454168 | 4.777667 | 2.275141  |
| C | -3.019076 | 2.001600  | 1.045274  | C | -6.068609 | 3.773385 | -0.209413 |
| H | -2.807227 | 1.940590  | -0.017788 | H | -5.959078 | 2.696960 | -0.038446 |
| C | -2.679872 | 4.911489  | 0.882976  | H | -7.082025 | 4.105109 | 0.043294  |
| C | -4.124844 | 1.124751  | 1.515251  | H | -5.842069 | 4.012023 | -1.255348 |
| O | -4.387671 | 0.910368  | 2.680380  | H | -0.101473 | 3.226835 | 2.312665  |
| O | -4.839454 | 0.632379  | 0.489586  | C | -0.366005 | 5.675056 | 1.307745  |
| C | -3.679381 | 4.059572  | 0.403441  | C | 0.600903  | 5.755842 | 2.329982  |
| H | -3.607284 | 3.587530  | -0.569198 | C | -0.397057 | 6.696380 | 0.336858  |
| H | -2.977803 | 5.928005  | 1.174238  | C | 1.504145  | 6.818819 | 2.374937  |
| C | -5.940719 | -0.226048 | 0.826572  | H | 0.633795  | 5.000613 | 3.117411  |
| H | -5.581998 | -1.112436 | 1.369755  | C | 0.508377  | 7.759190 | 0.381918  |
| H | -6.667946 | 0.307721  | 1.456582  | H | -1.123698 | 6.640388 | -0.477268 |
| H | -6.398985 | -0.519466 | -0.124658 | C | 1.463135  | 7.823859 | 1.401228  |
| N | -5.090750 | 4.493171  | 0.670013  | H | 2.239215  | 6.867928 | 3.181904  |
| C | -5.446280 | 4.372862  | 2.126156  | H | 0.471940  | 8.534678 | -0.387023 |
| H | -5.404860 | 3.315544  | 2.410808  | H | 2.173014  | 8.653711 | 1.438391  |

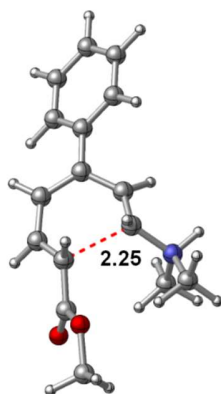

|                                              |                             |
|----------------------------------------------|-----------------------------|
| Zero-point correction=                       | 0.331649 (Hartree/Particle) |
| Thermal correction to Energy=                | 0.349785                    |
| Thermal correction to Enthalpy=              | 0.350730                    |
| Thermal correction to Gibbs Free Energy=     | 0.284833                    |
| Sum of electronic and zero-point Energies=   | -825.809078                 |
| Sum of electronic and thermal Energies=      | -825.790942                 |
| Sum of electronic and thermal Enthalpies=    | -825.789998                 |
| Sum of electronic and thermal Free Energies= | -825.855894                 |

**TS-3b-OH-dd'**

E(scf) = -826.148431900 a.u.

 $\nu_{\min} = -318.87 \text{ cm}^{-1}$ 

|   |           |           |           |   |           |          |           |
|---|-----------|-----------|-----------|---|-----------|----------|-----------|
| C | -1.699789 | 4.302640  | 0.139861  | H | -3.569880 | 2.688138 | -2.996599 |
| C | -1.091762 | 3.030920  | -0.283235 | H | -4.520623 | 4.188121 | -3.188866 |
| C | -1.721128 | 1.843961  | -0.172074 | H | -2.988131 | 4.216815 | -2.269526 |
| H | -1.241709 | 0.945121  | -0.577580 | C | -5.885780 | 2.629528 | -1.472174 |
| C | -3.013648 | 1.734280  | 0.527101  | H | -5.718495 | 1.619665 | -1.885053 |
| H | -3.024769 | 2.060323  | 1.572894  | H | -6.424133 | 2.543579 | -0.519245 |
| C | -3.046778 | 4.425905  | 0.244539  | H | -6.514664 | 3.186728 | -2.182902 |
| C | -3.872497 | 0.644535  | 0.289048  | H | -0.098786 | 3.074541 | -0.736382 |
| O | -3.844009 | -0.112661 | -0.785347 | C | -0.798194 | 5.460155 | 0.388088  |
| O | -4.838894 | 0.399626  | 1.126169  | C | -1.176965 | 6.773992 | 0.051749  |
| C | -4.067117 | 3.375099  | -0.046140 | C | 0.465428  | 5.256840 | 0.975006  |
| H | -4.806163 | 3.242002  | 0.750120  | C | -0.325678 | 7.850547 | 0.308575  |
| H | -3.491307 | 5.387725  | 0.519597  | H | -2.136719 | 6.952937 | -0.438230 |
| C | -5.811016 | -0.632992 | 0.841989  | C | 1.315084  | 6.334898 | 1.235914  |
| H | -6.361025 | -0.387536 | -0.077556 | H | 0.779911  | 4.246853 | 1.248919  |
| H | -5.309307 | -1.603526 | 0.732178  | C | 0.922582  | 7.635737 | 0.904164  |
| H | -6.484936 | -0.639175 | 1.704376  | H | -0.634326 | 8.861917 | 0.032691  |
| N | -4.622396 | 3.330175  | -1.276274 | H | 2.287533  | 6.157135 | 1.701657  |
| C | -3.879693 | 3.622203  | -2.495912 | H | 1.589170  | 8.478597 | 1.102487  |

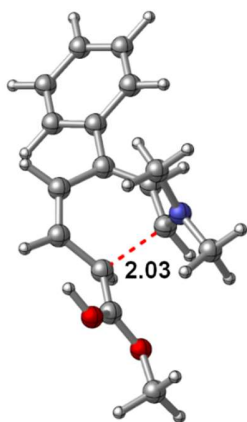

Zero-point correction=

0.329477 (Hartree/Particle)

|                                              |             |
|----------------------------------------------|-------------|
| Thermal correction to Energy=                | 0.347983    |
| Thermal correction to Enthalpy=              | 0.348927    |
| Thermal correction to Gibbs Free Energy=     | 0.282336    |
| Sum of electronic and zero-point Energies=   | -825.818955 |
| Sum of electronic and thermal Energies=      | -825.800449 |
| Sum of electronic and thermal Enthalpies=    | -825.799505 |
| Sum of electronic and thermal Free Energies= | -825.866096 |

**TS-3b-OH-r'**

E(scf) = -826.166183776 a.u.

$\nu_{\min} = -48.47 \text{ cm}^{-1}$

|   |           |           |          |   |           |          |           |
|---|-----------|-----------|----------|---|-----------|----------|-----------|
| C | -1.487231 | 4.778150  | 1.005915 | H | -5.438345 | 6.019048 | 1.956327  |
| C | -1.075725 | 3.433971  | 0.512495 | H | -5.224478 | 6.582941 | 0.266508  |
| C | -0.974126 | 2.337195  | 1.302535 | H | -6.744654 | 5.784489 | 0.760026  |
| H | -0.650427 | 1.417800  | 0.798498 | C | -6.073571 | 3.462968 | 0.119935  |
| C | -1.261350 | 2.273514  | 2.709762 | H | -6.789717 | 3.283259 | 0.935849  |
| H | -1.620222 | 3.162553  | 3.230740 | H | -6.624926 | 3.812860 | -0.765682 |
| C | -2.819243 | 5.141745  | 0.989869 | H | -5.550812 | 2.529389 | -0.119114 |
| C | -1.126461 | 1.151760  | 3.481685 | H | -0.833209 | 3.362867 | -0.552358 |
| O | -0.685717 | -0.048031 | 3.084143 | C | -0.438547 | 5.693337 | 1.487686  |
| O | -1.457378 | 1.196385  | 4.770407 | C | 0.916136  | 5.292528 | 1.431134  |
| C | -3.826133 | 4.231475  | 0.579425 | C | -0.729606 | 6.973933 | 2.018203  |
| H | -3.521421 | 3.224170  | 0.282510 | C | 1.934678  | 6.132783 | 1.878887  |
| H | -3.118295 | 6.138153  | 1.309960 | H | 1.162357  | 4.308418 | 1.031120  |
| C | -1.257002 | 0.045437  | 5.597101 | C | 0.288203  | 7.810003 | 2.465963  |
| H | -1.860293 | -0.805449 | 5.246308 | H | -1.759117 | 7.324916 | 2.093707  |
| H | -0.196576 | -0.248535 | 5.618383 | C | 1.625523  | 7.394179 | 2.397278  |
| H | -1.581426 | 0.342677  | 6.601501 | H | 2.974038  | 5.801457 | 1.823846  |
| N | -5.111212 | 4.486161  | 0.533226 | H | 0.040889  | 8.792398 | 2.874426  |
| C | -5.658749 | 5.797886  | 0.901797 | H | 2.422190  | 8.053593 | 2.749986  |

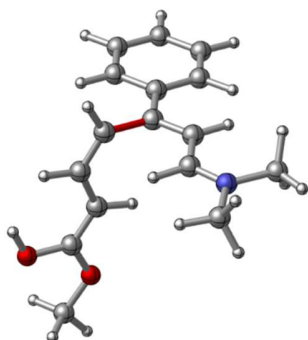

Zero-point correction= 0.328793 (Hartree/Particle)  
 Thermal correction to Energy= 0.348045  
 Thermal correction to Enthalpy= 0.348989  
 Thermal correction to Gibbs Free Energy= 0.279018  
 Sum of electronic and zero-point Energies= -825.837391  
 Sum of electronic and thermal Energies= -825.818139  
 Sum of electronic and thermal Enthalpies= -825.817194  
 Sum of electronic and thermal Free Energies= -825.887166

### TS-3a-dd

E(scf) = -825.722679153 a.u.

$\nu_{\text{min}} = -271.06 \text{ cm}^{-1}$

|   |           |           |           |   |           |           |           |
|---|-----------|-----------|-----------|---|-----------|-----------|-----------|
| C | -1.547054 | 4.106997  | 0.269649  | H | -3.135298 | 5.365426  | -0.292144 |
| C | -0.823768 | 2.863735  | 0.199963  | C | -5.792044 | -0.612710 | 0.510099  |
| C | -1.527881 | 1.668159  | 0.107577  | H | -6.127548 | -0.472052 | -0.530238 |
| H | -0.931139 | 5.009511  | 0.331151  | H | -5.354365 | -1.619034 | 0.598963  |
| H | -1.080183 | 0.814194  | -0.414938 | H | -6.644026 | -0.510704 | 1.194103  |
| C | -2.850816 | 1.548967  | 0.581097  | N | -4.773633 | 3.394766  | -1.173988 |
| H | -3.075396 | 1.991090  | 1.550823  | C | -4.291287 | 3.794043  | -2.486307 |
| C | -2.880299 | 4.344852  | 0.022586  | H | -4.465525 | 2.982333  | -3.213256 |
| C | -3.693194 | 0.431215  | 0.170332  | H | -4.817342 | 4.694787  | -2.845951 |
| O | -3.460844 | -0.360195 | -0.728004 | H | -3.215981 | 4.008468  | -2.442312 |
| O | -4.852664 | 0.392207  | 0.883719  | C | -6.099912 | 2.798925  | -1.142756 |
| C | -3.988156 | 3.407018  | -0.079620 | H | -6.852846 | 3.511498  | -1.519268 |
| H | -4.508882 | 3.093769  | 0.821668  | H | -6.134182 | 1.897497  | -1.779443 |



|   |           |          |           |   |          |          |           |
|---|-----------|----------|-----------|---|----------|----------|-----------|
| H | -6.360119 | 2.511018 | -0.116774 | C | 2.700809 | 3.927304 | -0.825118 |
| C | 0.646584  | 2.880512 | -0.001007 | H | 0.746895 | 4.801668 | -1.011317 |
| C | 1.431007  | 1.788002 | 0.430165  | C | 3.458695 | 2.831002 | -0.397132 |
| C | 1.317247  | 3.949686 | -0.635024 | H | 3.391518 | 0.898786 | 0.576597  |
| C | 2.813113  | 1.759016 | 0.228637  | H | 3.189475 | 4.768541 | -1.324304 |
| H | 0.946812  | 0.959418 | 0.952481  | H | 4.540994 | 2.813845 | -0.548329 |

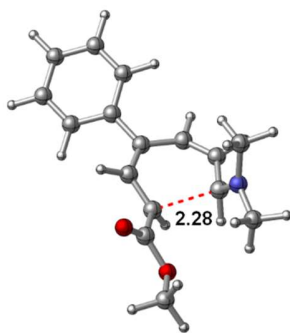

|                                              |                             |
|----------------------------------------------|-----------------------------|
| Zero-point correction=                       | 0.315739 (Hartree/Particle) |
| Thermal correction to Energy=                | 0.334345                    |
| Thermal correction to Enthalpy=              | 0.335290                    |
| Thermal correction to Gibbs Free Energy=     | 0.267966                    |
| Sum of electronic and zero-point Energies=   | -825.406940                 |
| Sum of electronic and thermal Energies=      | -825.388334                 |
| Sum of electronic and thermal Enthalpies=    | -825.387389                 |
| Sum of electronic and thermal Free Energies= | -825.454713                 |

### TS-3a-du

E(scf) = -825.712056002 a.u.

$\nu_{\min} = -560.69 \text{ cm}^{-1}$

|   |           |          |          |   |           |          |           |
|---|-----------|----------|----------|---|-----------|----------|-----------|
| C | -1.825050 | 4.186135 | 0.848739 | H | -1.664171 | 0.982769 | -0.401062 |
| C | -1.251318 | 2.961139 | 0.268977 | C | -3.336650 | 1.678047 | 0.778941  |
| C | -2.038841 | 1.825142 | 0.191413 | H | -3.558946 | 2.170960 | 1.726443  |
| H | -1.152864 | 4.869300 | 1.379900 | C | -3.132471 | 4.527591 | 0.765824  |

|   |           |           |           |   |           |          |           |
|---|-----------|-----------|-----------|---|-----------|----------|-----------|
| C | -4.316408 | 0.720803  | 0.379879  | C | -6.253746 | 3.140284 | -0.901967 |
| O | -5.422861 | 0.559859  | 0.905017  | H | -6.667735 | 2.201740 | -0.507673 |
| O | -3.966396 | 0.010665  | -0.743264 | H | -7.073152 | 3.834686 | -1.142405 |
| C | -4.071772 | 3.738376  | -0.053605 | H | -5.679950 | 2.925772 | -1.811718 |
| H | -3.722556 | 3.443866  | -1.049290 | C | 0.135574  | 2.995644 | -0.228194 |
| H | -3.508344 | 5.431781  | 1.249486  | C | 0.921841  | 1.823424 | -0.336370 |
| C | -4.936512 | -0.897438 | -1.243924 | C | 0.739064  | 4.212486 | -0.626010 |
| H | -5.234683 | -1.635257 | -0.481839 | C | 2.223736  | 1.863951 | -0.837280 |
| H | -5.845186 | -0.370380 | -1.580875 | H | 0.513007  | 0.868716 | 0.001940  |
| H | -4.472627 | -1.410673 | -2.097135 | C | 2.047554  | 4.253367 | -1.112933 |
| N | -5.381921 | 3.748677  | 0.104032  | H | 0.164383  | 5.140826 | -0.577723 |
| C | -6.006217 | 3.980550  | 1.402850  | C | 2.800415  | 3.079282 | -1.227619 |
| H | -6.981305 | 4.466787  | 1.261530  | H | 2.801817  | 0.938065 | -0.906024 |
| H | -6.150648 | 3.003214  | 1.893068  | H | 2.479054  | 5.211748 | -1.415349 |
| H | -5.371885 | 4.609845  | 2.036886  | H | 3.823955  | 3.110800 | -1.609348 |

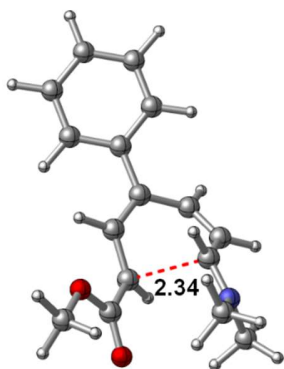

|                                              |                             |
|----------------------------------------------|-----------------------------|
| Zero-point correction=                       | 0.315493 (Hartree/Particle) |
| Thermal correction to Energy=                | 0.334036                    |
| Thermal correction to Enthalpy=              | 0.334980                    |
| Thermal correction to Gibbs Free Energy=     | 0.268160                    |
| Sum of electronic and zero-point Energies=   | -825.396563                 |
| Sum of electronic and thermal Energies=      | -825.378020                 |
| Sum of electronic and thermal Enthalpies=    | -825.377076                 |
| Sum of electronic and thermal Free Energies= | -825.443896                 |

### TS-3a-H-dd

E(scf) = -826.140311565 a.u.

$\nu_{\min}$  = -442.01  $\text{cm}^{-1}$

|   |           |           |           |   |           |          |           |
|---|-----------|-----------|-----------|---|-----------|----------|-----------|
| C | -1.516028 | 4.084252  | 0.318859  | C | -5.450945 | 2.459764 | -1.862617 |
| C | -0.767430 | 2.890849  | 0.132568  | H | -5.909751 | 1.813804 | -1.106395 |
| C | -1.421780 | 1.714408  | -0.252648 | H | -6.195533 | 2.765484 | -2.606984 |
| H | -0.934600 | 4.994690  | 0.484253  | H | -4.615878 | 1.942130 | -2.347174 |
| H | -0.921446 | 1.020291  | -0.934918 | C | -6.036732 | 4.520246 | -0.603020 |
| C | -2.747952 | 1.458518  | 0.111420  | H | -6.726816 | 4.796712 | -1.409735 |
| H | -3.022356 | 1.662803  | 1.143611  | H | -6.557814 | 3.922556 | 0.154574  |
| C | -2.846245 | 4.291098  | -0.041220 | H | -5.603821 | 5.417553 | -0.146231 |
| C | -3.469700 | 0.316372  | -0.513866 | C | 0.717014  | 2.949379 | 0.080468  |
| O | -3.133209 | -0.243257 | -1.534784 | C | 1.462473  | 1.817069 | 0.466870  |
| O | -4.574470 | 0.003851  | 0.181177  | C | 1.417482  | 4.093184 | -0.352381 |
| C | -3.887717 | 3.344593  | -0.147054 | C | 2.858328  | 1.828559 | 0.426720  |
| H | -4.393237 | 2.914357  | 0.712410  | H | 0.939470  | 0.926945 | 0.824404  |
| H | -3.061125 | 5.301441  | -0.419815 | C | 2.813060  | 4.104250 | -0.390761 |
| C | -5.360364 | -1.089933 | -0.315527 | H | 0.870769  | 4.975113 | -0.692245 |
| H | -5.723451 | -0.876298 | -1.332334 | C | 3.539212  | 2.973193 | -0.000730 |
| H | -4.761833 | -2.012235 | -0.339799 | H | 3.416249  | 0.942183 | 0.738340  |
| H | -6.202991 | -1.198140 | 0.376706  | H | 3.336498  | 4.998396 | -0.738033 |
| N | -4.925172 | 3.687030  | -1.178886 | H | 4.631431  | 2.984171 | -0.031491 |

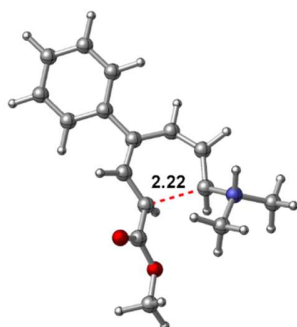

|                                              |                             |
|----------------------------------------------|-----------------------------|
| Zero-point correction=                       | 0.331674 (Hartree/Particle) |
| Thermal correction to Energy=                | 0.349856                    |
| Thermal correction to Enthalpy=              | 0.350800                    |
| Thermal correction to Gibbs Free Energy=     | 0.284574                    |
| Sum of electronic and zero-point Energies=   | -825.808637                 |
| Sum of electronic and thermal Energies=      | -825.790456                 |
| Sum of electronic and thermal Enthalpies=    | -825.789511                 |
| Sum of electronic and thermal Free Energies= | -825.855738                 |

### TS-3a-H-du

E(scf) = -826.134641835 a.u.

$\nu_{\min} = -452.13 \text{ cm}^{-1}$

|   |           |          |           |   |           |          |           |
|---|-----------|----------|-----------|---|-----------|----------|-----------|
| C | -2.251304 | 3.857057 | -0.942429 | H | -1.731135 | 4.522908 | -1.636005 |
| C | -1.430928 | 2.949775 | -0.226219 | H | -1.202432 | 2.343545 | 1.796821  |
| C | -1.904531 | 2.347457 | 0.954335  | C | -3.215026 | 1.922469 | 1.221071  |

|   |           |           |           |   |           |          |           |
|---|-----------|-----------|-----------|---|-----------|----------|-----------|
| H | -3.504185 | 1.861826  | 2.275294  | H | -5.414545 | 3.291625 | 2.595663  |
| C | -3.557865 | 4.216293  | -0.620375 | C | -6.785416 | 4.198198 | -0.396705 |
| C | -3.872888 | 0.822429  | 0.459858  | H | -7.116979 | 3.213035 | -0.746137 |
| O | -4.821014 | 0.197812  | 0.890590  | H | -7.614193 | 4.730739 | 0.085765  |
| O | -3.330648 | 0.605685  | -0.743427 | H | -6.389916 | 4.783847 | -1.234150 |
| C | -4.487431 | 3.365352  | -0.010044 | C | 0.029935  | 2.897248 | -0.498107 |
| H | -4.791928 | 2.462373  | -0.529165 | C | 0.712813  | 1.686270 | -0.267108 |
| H | -3.834345 | 5.265574  | -0.792054 | C | 0.766506  | 4.000497 | -0.973099 |
| C | -3.914552 | -0.434187 | -1.542219 | C | 2.084925  | 1.579030 | -0.505861 |
| H | -3.823445 | -1.405463 | -1.034513 | H | 0.150977  | 0.815352 | 0.079070  |
| H | -4.978508 | -0.227063 | -1.730211 | C | 2.137747  | 3.892680 | -1.210630 |
| H | -3.353752 | -0.441328 | -2.483768 | H | 0.275150  | 4.962591 | -1.131500 |
| N | -5.685731 | 3.995118  | 0.611841  | C | 2.802081  | 2.682173 | -0.979415 |
| C | -6.166560 | 3.213006  | 1.803851  | H | 2.593454  | 0.628322 | -0.328206 |
| H | -7.119663 | 3.637337  | 2.139612  | H | 2.693738  | 4.762541 | -1.568761 |
| H | -6.285571 | 2.163751  | 1.508156  | H | 3.875439  | 2.600804 | -1.167370 |

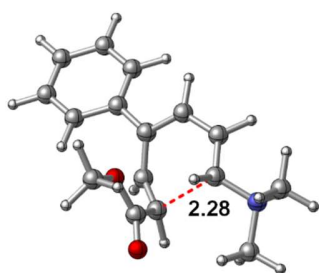

Zero-point correction= 0.331309 (Hartree/Particle)  
 Thermal correction to Energy= 0.349503  
 Thermal correction to Enthalpy= 0.350447  
 Thermal correction to Gibbs Free Energy= 0.284320  
 Sum of electronic and zero-point Energies= -825.803333  
 Sum of electronic and thermal Energies= -825.785139  
 Sum of electronic and thermal Enthalpies= -825.784195  
 Sum of electronic and thermal Free Energies= -825.850322

### TS-3a-H-ud

E(scf) = -826.134517421 a.u.

$\nu_{\min} = -459.25 \text{ cm}^{-1}$

|   |           |          |           |   |           |          |           |
|---|-----------|----------|-----------|---|-----------|----------|-----------|
| C | -1.334476 | 4.583610 | -0.201692 | C | -2.636249 | 4.948586 | -0.547216 |
| C | -0.814222 | 3.267200 | -0.185375 | C | -3.547089 | 1.825510 | 1.016000  |
| C | -1.614786 | 2.178600 | -0.593190 | O | -4.614507 | 1.286580 | 1.226347  |
| H | -0.593958 | 5.387788 | -0.205431 | O | -2.773713 | 2.335140 | 1.981812  |
| H | -1.135787 | 1.485125 | -1.295285 | C | -3.759211 | 4.164524 | -0.276412 |
| C | -2.980453 | 1.986640 | -0.352405 | H | -3.979789 | 3.916320 | 0.754934  |
| H | -3.516018 | 1.333948 | -1.050926 | H | -2.751804 | 5.870644 | -1.132872 |

|   |           |          |           |   |           |          |           |
|---|-----------|----------|-----------|---|-----------|----------|-----------|
| C | -3.252950 | 2.213489 | 3.329541  | H | -6.331197 | 4.062554 | 0.587364  |
| H | -4.225004 | 2.716376 | 3.441481  | C | 0.653681  | 3.050027 | -0.093515 |
| H | -3.364281 | 1.154291 | 3.603508  | C | 1.118913  | 1.855214 | 0.491628  |
| H | -2.498239 | 2.694623 | 3.961961  | C | 1.603408  | 3.978809 | -0.563601 |
| N | -5.014124 | 4.436328 | -1.036501 | C | 2.486901  | 1.597965 | 0.607988  |
| C | -4.863924 | 4.129288 | -2.499243 | H | 0.394885  | 1.135766 | 0.881719  |
| H | -4.686363 | 3.052894 | -2.601579 | C | 2.970131  | 3.720448 | -0.447769 |
| H | -5.785130 | 4.421726 | -3.016745 | H | 1.277456  | 4.899213 | -1.052295 |
| H | -4.010381 | 4.688877 | -2.897223 | C | 3.417411  | 2.530619 | 0.139306  |
| C | -6.181962 | 3.706633 | -0.438563 | H | 2.826257  | 0.669208 | 1.073015  |
| H | -7.071240 | 3.911232 | -1.044831 | H | 3.691269  | 4.448136 | -0.827830 |
| H | -5.952995 | 2.634756 | -0.425874 | H | 4.488149  | 2.332028 | 0.229500  |

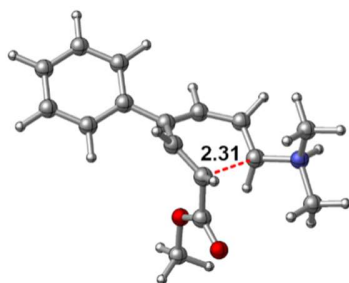

|                                              |                             |
|----------------------------------------------|-----------------------------|
| Zero-point correction=                       | 0.331229 (Hartree/Particle) |
| Thermal correction to Energy=                | 0.349445                    |
| Thermal correction to Enthalpy=              | 0.350389                    |
| Thermal correction to Gibbs Free Energy=     | 0.284004                    |
| Sum of electronic and zero-point Energies=   | -825.803288                 |
| Sum of electronic and thermal Energies=      | -825.785072                 |
| Sum of electronic and thermal Enthalpies=    | -825.784128                 |
| Sum of electronic and thermal Free Energies= | -825.850513                 |

### TS-3a-H-uu

E(scf) = -826.141145497 a.u.

$\nu_{\min} = -461.34 \text{ cm}^{-1}$

|   |           |          |          |   |           |           |           |
|---|-----------|----------|----------|---|-----------|-----------|-----------|
| C | -1.475648 | 4.685812 | 1.460235 | H | -3.623007 | 3.629552  | -0.425361 |
| C | -1.053997 | 3.468102 | 2.053679 | H | -3.093857 | 6.025537  | 1.254038  |
| C | -1.938927 | 2.379327 | 2.131220 | C | -5.681033 | -0.242253 | 0.578587  |
| H | -1.950017 | 1.787563 | 3.052562 | H | -5.331785 | -1.132904 | 1.120843  |
| C | -2.904344 | 2.102290 | 1.159788 | H | -6.490983 | 0.230533  | 1.154140  |
| H | -2.596550 | 2.112460 | 0.118067 | H | -6.030843 | -0.516069 | -0.423161 |
| C | -2.771869 | 4.994599 | 1.045469 | N | -5.165238 | 4.489258  | 0.773012  |
| C | -4.005231 | 1.156088 | 1.489633 | C | -5.559350 | 4.290918  | 2.211412  |
| O | -4.362270 | 0.878574 | 2.615246 | H | -5.484443 | 3.223938  | 2.450983  |
| O | -4.597113 | 0.680350 | 0.382787 | H | -4.868503 | 4.859647  | 2.843873  |
| C | -3.733904 | 4.105369 | 0.541553 | H | -6.586115 | 4.650326  | 2.347477  |

|   |           |          |           |   |          |          |          |
|---|-----------|----------|-----------|---|----------|----------|----------|
| C | -6.089182 | 3.775512 | -0.166988 | C | 2.079858 | 2.133738 | 3.713201 |
| H | -5.937323 | 2.697448 | -0.044846 | H | 0.532713 | 1.333035 | 2.440489 |
| H | -7.122749 | 4.050413 | 0.071615  | C | 1.886047 | 4.479078 | 4.270845 |
| H | -5.844677 | 4.073126 | -1.193362 | H | 0.168905 | 5.510731 | 3.492668 |
| H | -0.815413 | 5.543925 | 1.609022  | C | 2.577408 | 3.265790 | 4.366534 |
| C | 0.196760  | 3.431712 | 2.857317  | H | 2.614689 | 1.183053 | 3.777662 |
| C | 0.902232  | 2.216218 | 2.966964  | H | 2.260593 | 5.365260 | 4.788973 |
| C | 0.708234  | 4.562024 | 3.526205  | H | 3.499404 | 3.203679 | 4.949693 |

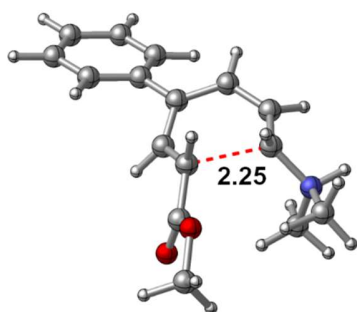

|                                              |                             |
|----------------------------------------------|-----------------------------|
| Zero-point correction=                       | 0.331492 (Hartree/Particle) |
| Thermal correction to Energy=                | 0.349737                    |
| Thermal correction to Enthalpy=              | 0.350681                    |
| Thermal correction to Gibbs Free Energy=     | 0.284361                    |
| Sum of electronic and zero-point Energies=   | -825.809654                 |
| Sum of electronic and thermal Energies=      | -825.791409                 |
| Sum of electronic and thermal Enthalpies=    | -825.790464                 |
| Sum of electronic and thermal Free Energies= | -825.856784                 |

### TS-3a-OH-dd'

E(scf) = -826.149667240 a.u.

$\nu_{\min} = -310.59 \text{ cm}^{-1}$

|   |           |           |           |   |           |           |           |
|---|-----------|-----------|-----------|---|-----------|-----------|-----------|
| C | -1.662240 | 4.069067  | 0.722936  | H | -6.354432 | -0.394191 | -0.420138 |
| C | -0.981974 | 2.830133  | 0.313241  | H | -5.454925 | -1.681965 | 0.458950  |
| C | -1.690788 | 1.671685  | 0.249872  | H | -6.729256 | -0.730326 | 1.312123  |
| H | -1.037712 | 4.898589  | 1.064028  | N | -4.385559 | 3.341465  | -1.148271 |
| H | -1.213460 | 0.776162  | -0.164184 | C | -3.468327 | 3.660805  | -2.235829 |
| C | -3.069096 | 1.587754  | 0.753893  | H | -3.153339 | 2.741143  | -2.759104 |
| H | -3.220507 | 1.856871  | 1.805213  | H | -3.972292 | 4.315669  | -2.962806 |
| C | -2.990218 | 4.273132  | 0.633549  | H | -2.579515 | 4.172677  | -1.851977 |
| C | -3.917945 | 0.542153  | 0.336730  | C | -5.637042 | 2.715813  | -1.558137 |
| O | -3.761082 | -0.153767 | -0.766506 | H | -6.134838 | 3.340354  | -2.315206 |
| O | -4.993530 | 0.282630  | 1.021162  | H | -5.455209 | 1.722114  | -2.003276 |
| C | -4.001512 | 3.286337  | 0.144693  | H | -6.308423 | 2.607365  | -0.696344 |
| H | -4.843314 | 3.134979  | 0.827730  | C | 0.448803  | 2.898521  | -0.072849 |
| H | -3.411120 | 5.255709  | 0.873198  | C | 1.316299  | 1.810822  | 0.153239  |
| C | -5.942987 | -0.702671 | 0.551269  | C | 0.972850  | 4.050363  | -0.693696 |

|   |          |          |           |   |          |          |           |
|---|----------|----------|-----------|---|----------|----------|-----------|
| C | 2.653853 | 1.866367 | -0.243591 | C | 3.157397 | 3.013311 | -0.867764 |
| H | 0.945313 | 0.922629 | 0.669741  | H | 3.310252 | 1.013734 | -0.052364 |
| C | 2.311494 | 4.105212 | -1.089482 | H | 2.694246 | 5.005088 | -1.577355 |
| H | 0.322999 | 4.906009 | -0.891859 | H | 4.205528 | 3.058200 | -1.173433 |

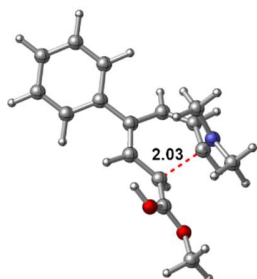

|                                              |                             |
|----------------------------------------------|-----------------------------|
| Zero-point correction=                       | 0.329801 (Hartree/Particle) |
| Thermal correction to Energy=                | 0.348166                    |
| Thermal correction to Enthalpy=              | 0.349110                    |
| Thermal correction to Gibbs Free Energy=     | 0.283215                    |
| Sum of electronic and zero-point Energies=   | -825.819866                 |
| Sum of electronic and thermal Energies=      | -825.801501                 |
| Sum of electronic and thermal Enthalpies=    | -825.800557                 |
| Sum of electronic and thermal Free Energies= | -825.866453                 |

### TS-3a-OH-du'

E(scf) = -826.147067192 a.u.

$\nu_{\min} = -231.47 \text{ cm}^{-1}$

|   |           |          |           |   |           |           |           |
|---|-----------|----------|-----------|---|-----------|-----------|-----------|
| C | -2.636233 | 2.672434 | -1.571319 | O | -5.131036 | -0.429183 | 0.598073  |
| C | -1.803647 | 2.527064 | -0.362140 | O | -3.310978 | -0.252713 | -0.652851 |
| C | -2.327505 | 2.029299 | 0.786192  | C | -4.848419 | 2.734444  | -0.368193 |
| H | -2.117115 | 2.732684 | -2.531390 | H | -5.688157 | 2.036503  | -0.445310 |
| H | -1.728972 | 2.057330 | 1.702414  | H | -4.515823 | 2.935267  | -2.512116 |
| C | -3.687408 | 1.466057 | 0.906532  | C | -3.739929 | -1.440074 | -1.353192 |
| H | -4.205857 | 1.651023 | 1.853337  | H | -3.815105 | -2.285907 | -0.656320 |
| C | -3.974967 | 2.789612 | -1.570782 | H | -4.710772 | -1.264199 | -1.836334 |
| C | -4.025236 | 0.238552 | 0.319771  | H | -2.965417 | -1.627217 | -2.104081 |

|   |           |          |           |   |           |          |           |
|---|-----------|----------|-----------|---|-----------|----------|-----------|
| N | -5.143362 | 3.842061 | 0.324944  | C | 0.623093  | 2.367700 | 0.302412  |
| C | -6.228460 | 3.814873 | 1.298989  | C | -0.055173 | 4.121682 | -1.217788 |
| H | -5.831379 | 3.643808 | 2.315450  | C | 1.936357  | 2.840738 | 0.261219  |
| H | -6.755677 | 4.779822 | 1.292565  | H | 0.389424  | 1.476639 | 0.889436  |
| H | -6.940542 | 3.016437 | 1.053511  | C | 1.258829  | 4.594710 | -1.258259 |
| C | -4.203460 | 4.946715 | 0.479001  | H | -0.826878 | 4.641726 | -1.790663 |
| H | -4.760064 | 5.893940 | 0.518510  | C | 2.260125  | 3.957266 | -0.518024 |
| H | -3.633991 | 4.832038 | 1.417882  | H | 2.714267  | 2.326709 | 0.831438  |
| H | -3.501733 | 4.974765 | -0.361274 | H | 1.500411  | 5.468049 | -1.869273 |
| C | -0.398627 | 3.005178 | -0.429268 | H | 3.288879  | 4.323998 | -0.553715 |

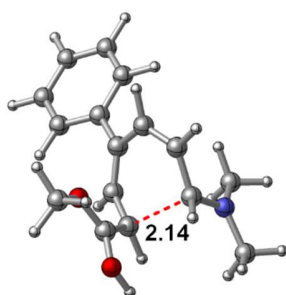

|                                              |                             |
|----------------------------------------------|-----------------------------|
| Zero-point correction=                       | 0.329273 (Hartree/Particle) |
| Thermal correction to Energy=                | 0.347898                    |
| Thermal correction to Enthalpy=              | 0.348842                    |
| Thermal correction to Gibbs Free Energy=     | 0.282046                    |
| Sum of electronic and zero-point Energies=   | -825.817794                 |
| Sum of electronic and thermal Energies=      | -825.799169                 |
| Sum of electronic and thermal Enthalpies=    | -825.798225                 |
| Sum of electronic and thermal Free Energies= | -825.865022                 |

### TS-3a-OH-ud'

E(scf) = -826.142578945 a.u.

$\nu_{\min} = -228.28 \text{ cm}^{-1}$

|   |           |          |           |   |           |          |           |
|---|-----------|----------|-----------|---|-----------|----------|-----------|
| C | -1.666837 | 4.290178 | 0.619375  | C | -2.948304 | 4.680521 | 0.507320  |
| C | -1.128279 | 3.011390 | 0.116103  | C | -3.737781 | 1.851723 | 1.686997  |
| C | -1.940161 | 1.938831 | -0.062327 | O | -5.002732 | 1.597448 | 1.974162  |
| H | -0.957633 | 4.985501 | 1.076063  | O | -2.880929 | 2.175383 | 2.625068  |
| H | -1.545444 | 1.046594 | -0.559039 | C | -4.047657 | 3.871750 | -0.084582 |
| C | -3.358814 | 1.895461 | 0.341996  | H | -4.942815 | 3.778049 | 0.538341  |
| H | -4.050604 | 1.351269 | -0.306890 | H | -3.257949 | 5.666245 | 0.871182  |



|   |           |          |           |   |           |          |           |
|---|-----------|----------|-----------|---|-----------|----------|-----------|
| C | -3.278670 | 2.364071 | 3.994336  | H | -6.310818 | 3.307896 | -1.089389 |
| H | -4.017365 | 3.176395 | 4.075583  | C | 0.312142  | 2.962428 | -0.244392 |
| H | -3.668264 | 1.427113 | 4.422856  | C | 1.064176  | 1.782268 | -0.078401 |
| H | -2.365990 | 2.647984 | 4.528736  | C | 0.960716  | 4.094985 | -0.776365 |
| N | -4.320319 | 3.929630 | -1.394629 | C | 2.409888  | 1.731473 | -0.447876 |
| C | -3.292338 | 4.145459 | -2.406361 | H | 0.594605  | 0.903031 | 0.368341  |
| H | -2.939545 | 3.176776 | -2.801228 | C | 2.307218  | 4.043638 | -1.145804 |
| H | -3.716437 | 4.729597 | -3.235721 | H | 0.402533  | 5.022732 | -0.924260 |
| H | -2.441160 | 4.687575 | -1.981029 | C | 3.037497  | 2.861492 | -0.984427 |
| C | -5.566789 | 3.360672 | -1.894464 | H | 2.975366  | 0.807268 | -0.304235 |
| H | -5.959716 | 3.987496 | -2.708150 | H | 2.787021  | 4.931655 | -1.564903 |
| H | -5.394702 | 2.344404 | -2.291484 | H | 4.091948  | 2.822690 | -1.268572 |

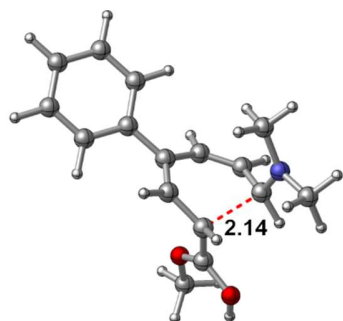

|                                              |                             |
|----------------------------------------------|-----------------------------|
| Zero-point correction=                       | 0.328540 (Hartree/Particle) |
| Thermal correction to Energy=                | 0.347434                    |
| Thermal correction to Enthalpy=              | 0.348379                    |
| Thermal correction to Gibbs Free Energy=     | 0.280772                    |
| Sum of electronic and zero-point Energies=   | -825.814039                 |
| Sum of electronic and thermal Energies=      | -825.795145                 |
| Sum of electronic and thermal Enthalpies=    | -825.794200                 |
| Sum of electronic and thermal Free Energies= | -825.861807                 |

### TS-3a-OH-uu'

E(scf) = -826.149706076 a.u.

$\nu_{\min} = -307.35 \text{ cm}^{-1}$

|   |           |          |           |   |           |          |           |
|---|-----------|----------|-----------|---|-----------|----------|-----------|
| C | -1.410479 | 4.391634 | 0.930068  | C | -2.593691 | 4.605233 | 0.323901  |
| C | -1.131636 | 3.269447 | 1.840314  | C | -3.922527 | 1.022625 | 0.829705  |
| C | -1.896159 | 2.147435 | 1.769402  | O | -4.379963 | 0.577554 | 1.978186  |
| H | -1.759256 | 1.360121 | 2.519653  | O | -4.568301 | 0.626326 | -0.228130 |
| C | -2.873745 | 1.954270 | 0.688554  | C | -3.807749 | 3.740262 | 0.435456  |
| H | -2.482058 | 1.992298 | -0.334129 | H | -4.233226 | 3.441481 | -0.527685 |

|   |           |           |           |   |           |          |          |
|---|-----------|-----------|-----------|---|-----------|----------|----------|
| H | -2.750047 | 5.513512  | -0.268308 | H | -6.286268 | 3.224056 | 0.168204 |
| C | -5.733195 | -0.222165 | -0.101876 | H | -0.620041 | 5.132773 | 0.787070 |
| H | -5.464166 | -1.159402 | 0.402954  | C | -0.052128 | 3.423053 | 2.846335 |
| H | -6.516898 | 0.299789  | 0.465379  | C | 0.716579  | 2.317714 | 3.263118 |
| H | -6.062293 | -0.413579 | -1.128000 | C | 0.220578  | 4.679886 | 3.423142 |
| N | -4.752900 | 4.067847  | 1.341893  | C | 1.710193  | 2.461113 | 4.233664 |
| C | -4.435762 | 4.619765  | 2.653592  | H | 0.552248  | 1.341322 | 2.801637 |
| H | -4.479057 | 3.832294  | 3.426267  | C | 1.215055  | 4.822256 | 4.393863 |
| H | -3.433614 | 5.061558  | 2.653596  | H | -0.365658 | 5.553442 | 3.128074 |
| H | -5.169617 | 5.397876  | 2.912693  | C | 1.963268  | 3.713694 | 4.804225 |
| C | -6.100542 | 3.527729  | 1.206745  | H | 2.299352  | 1.591921 | 4.536638 |
| H | -6.245364 | 2.656703  | 1.869383  | H | 1.403538  | 5.804419 | 4.834460 |
| H | -6.839080 | 4.293838  | 1.487106  | H | 2.744473  | 3.826346 | 5.559910 |

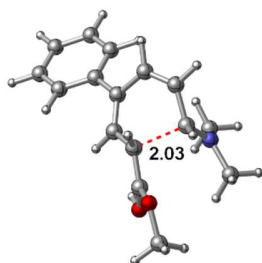

|                                              |                             |
|----------------------------------------------|-----------------------------|
| Zero-point correction=                       | 0.329782 (Hartree/Particle) |
| Thermal correction to Energy=                | 0.348140                    |
| Thermal correction to Enthalpy=              | 0.349084                    |
| Thermal correction to Gibbs Free Energy=     | 0.283185                    |
| Sum of electronic and zero-point Energies=   | -825.819924                 |
| Sum of electronic and thermal Energies=      | -825.801566                 |
| Sum of electronic and thermal Enthalpies=    | -825.800622                 |
| Sum of electronic and thermal Free Energies= | -825.866521                 |

### TS-3a-ud

E(scf) = -825.713904076 a.u.

$\nu_{\min} = -318.43 \text{ cm}^{-1}$

|   |           |          |           |   |           |          |           |
|---|-----------|----------|-----------|---|-----------|----------|-----------|
| C | -1.426196 | 4.395015 | 0.002069  | H | -1.163486 | 1.152685 | -0.884617 |
| C | -0.849189 | 3.078609 | -0.045118 | C | -3.022700 | 1.833525 | -0.032254 |
| C | -1.636196 | 1.966301 | -0.316833 | H | -3.589038 | 1.131648 | -0.654120 |
| H | -0.706888 | 5.217415 | 0.060694  | C | -2.715314 | 4.780640 | -0.266952 |

|   |           |          |           |   |           |          |           |
|---|-----------|----------|-----------|---|-----------|----------|-----------|
| C | -3.568043 | 1.840546 | 1.325680  | C | -6.194646 | 3.545291 | -0.987137 |
| O | -4.646174 | 1.354093 | 1.637436  | H | -6.976911 | 4.268877 | -1.269099 |
| O | -2.792119 | 2.480689 | 2.232462  | H | -6.331609 | 2.635394 | -1.599691 |
| C | -3.919992 | 3.977615 | -0.258089 | H | -6.319655 | 3.269573 | 0.068007  |
| H | -4.323273 | 3.721235 | 0.717479  | C | 0.630771  | 2.937575 | -0.083206 |
| H | -2.861194 | 5.818993 | -0.590361 | C | 1.231711  | 1.769870 | 0.433551  |
| C | -3.288433 | 2.536803 | 3.567820  | C | 1.482367  | 3.918552 | -0.635429 |
| H | -4.260647 | 3.052784 | 3.609050  | C | 2.616360  | 1.584815 | 0.392700  |
| H | -3.414647 | 1.526680 | 3.988016  | H | 0.598375  | 1.009050 | 0.896107  |
| H | -2.542933 | 3.094380 | 4.148889  | C | 2.866940  | 3.738950 | -0.668380 |
| N | -4.873689 | 4.112328 | -1.201866 | H | 1.057111  | 4.824940 | -1.071776 |
| C | -4.567186 | 4.491921 | -2.570349 | C | 3.443213  | 2.570274 | -0.156141 |
| H | -4.806866 | 3.661704 | -3.259204 | H | 3.052134  | 0.670601 | 0.804730  |
| H | -5.159114 | 5.370856 | -2.875387 | H | 3.500554  | 4.513358 | -1.109185 |
| H | -3.501658 | 4.733490 | -2.669428 | H | 4.526963  | 2.431230 | -0.183096 |

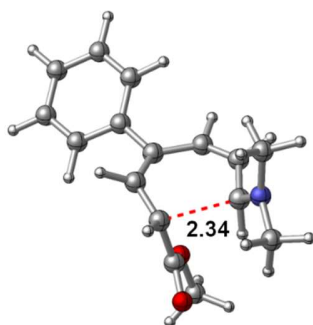

|                                              |                             |
|----------------------------------------------|-----------------------------|
| Zero-point correction=                       | 0.315350 (Hartree/Particle) |
| Thermal correction to Energy=                | 0.334113                    |
| Thermal correction to Enthalpy=              | 0.335057                    |
| Thermal correction to Gibbs Free Energy=     | 0.266729                    |
| Sum of electronic and zero-point Energies=   | -825.398554                 |
| Sum of electronic and thermal Energies=      | -825.379791                 |
| Sum of electronic and thermal Enthalpies=    | -825.378847                 |
| Sum of electronic and thermal Free Energies= | -825.447175                 |

### TS-3a-uu

E(scf) = -825.722678629 a.u.

$\nu_{\min} = -268.29 \text{ cm}^{-1}$

|   |           |          |          |   |           |          |          |
|---|-----------|----------|----------|---|-----------|----------|----------|
| C | -1.475648 | 4.685812 | 1.460235 | H | -1.950017 | 1.787563 | 3.052562 |
| C | -1.053997 | 3.468102 | 2.053679 | C | -2.904344 | 2.102290 | 1.159788 |
| C | -1.938927 | 2.379327 | 2.131220 | H | -2.596550 | 2.112460 | 0.118067 |

|   |           |           |           |   |           |          |           |
|---|-----------|-----------|-----------|---|-----------|----------|-----------|
| C | -2.771869 | 4.994599  | 1.045469  | C | -6.089182 | 3.775512 | -0.166988 |
| C | -4.005231 | 1.156088  | 1.489633  | H | -5.937323 | 2.697448 | -0.044846 |
| O | -4.362270 | 0.878574  | 2.615246  | H | -7.122749 | 4.050413 | 0.071615  |
| O | -4.597113 | 0.680350  | 0.382787  | H | -5.844677 | 4.073126 | -1.193362 |
| C | -3.733904 | 4.105369  | 0.541553  | H | -0.815413 | 5.543925 | 1.609022  |
| H | -3.623007 | 3.629552  | -0.425361 | C | 0.196760  | 3.431712 | 2.857317  |
| H | -3.093857 | 6.025537  | 1.254038  | C | 0.902232  | 2.216218 | 2.966964  |
| C | -5.681033 | -0.242253 | 0.578587  | C | 0.708234  | 4.562024 | 3.526205  |
| H | -5.331785 | -1.132904 | 1.120843  | C | 2.079858  | 2.133738 | 3.713201  |
| H | -6.490983 | 0.230533  | 1.154140  | H | 0.532713  | 1.333035 | 2.440489  |
| H | -6.030843 | -0.516069 | -0.423161 | C | 1.886047  | 4.479078 | 4.270845  |
| N | -5.165238 | 4.489258  | 0.773012  | H | 0.168905  | 5.510731 | 3.492668  |
| C | -5.559350 | 4.290918  | 2.211412  | C | 2.577408  | 3.265790 | 4.366534  |
| H | -5.484443 | 3.223938  | 2.450983  | H | 2.614689  | 1.183053 | 3.777662  |
| H | -4.868503 | 4.859647  | 2.843873  | H | 2.260593  | 5.365260 | 4.788973  |
| H | -6.586115 | 4.650326  | 2.347477  | H | 3.499404  | 3.203679 | 4.949693  |

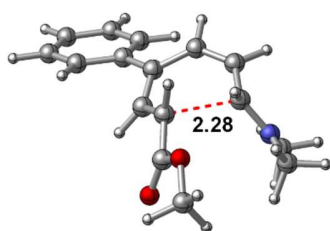

|                                              |                             |
|----------------------------------------------|-----------------------------|
| Zero-point correction=                       | 0.315729 (Hartree/Particle) |
| Thermal correction to Energy=                | 0.334345                    |
| Thermal correction to Enthalpy=              | 0.335289                    |
| Thermal correction to Gibbs Free Energy=     | 0.267895                    |
| Sum of electronic and zero-point Energies=   | -825.406950                 |
| Sum of electronic and thermal Energies=      | -825.388333                 |
| Sum of electronic and thermal Enthalpies=    | -825.387389                 |
| Sum of electronic and thermal Free Energies= | -825.454784                 |

### TS-3b-dd

E(scf) = -825.719040934 a.u.

$\nu_{\min} = -276.49 \text{ cm}^{-1}$

|   |           |          |           |   |           |           |           |
|---|-----------|----------|-----------|---|-----------|-----------|-----------|
| C | -1.547054 | 4.106997 | 0.269649  | C | -2.850816 | 1.548967  | 0.581097  |
| C | -0.823768 | 2.863735 | 0.199963  | H | -3.075396 | 1.991090  | 1.550823  |
| C | -1.527881 | 1.668159 | 0.107577  | C | -2.880299 | 4.344852  | 0.022586  |
| H | -0.931139 | 5.009511 | 0.331151  | C | -3.693194 | 0.431215  | 0.170332  |
| H | -1.080183 | 0.814194 | -0.414938 | O | -3.460844 | -0.360195 | -0.728004 |

|   |           |           |           |   |           |          |           |
|---|-----------|-----------|-----------|---|-----------|----------|-----------|
| O | -4.852664 | 0.392207  | 0.883719  | C | -6.099912 | 2.798925 | -1.142756 |
| C | -3.988156 | 3.407018  | -0.079620 | H | -6.852846 | 3.511498 | -1.519268 |
| H | -4.508882 | 3.093769  | 0.821668  | H | -6.134182 | 1.897497 | -1.779443 |
| H | -3.135298 | 5.365426  | -0.292144 | H | -6.360119 | 2.511018 | -0.116774 |
| C | -5.792044 | -0.612710 | 0.510099  | C | 0.646584  | 2.880512 | -0.001007 |
| H | -6.127548 | -0.472052 | -0.530238 | C | 1.431007  | 1.788002 | 0.430165  |
| H | -5.354365 | -1.619034 | 0.598963  | C | 1.317247  | 3.949686 | -0.635024 |
| H | -6.644026 | -0.510704 | 1.194103  | C | 2.813113  | 1.759016 | 0.228637  |
| N | -4.773633 | 3.394766  | -1.173988 | H | 0.946812  | 0.959418 | 0.952481  |
| C | -4.291287 | 3.794043  | -2.486307 | C | 2.700809  | 3.927304 | -0.825118 |
| H | -4.465525 | 2.982333  | -3.213256 | H | 0.746895  | 4.801668 | -1.011317 |
| H | -4.817342 | 4.694787  | -2.845951 | C | 3.458695  | 2.831002 | -0.397132 |
| H | -3.215981 | 4.008468  | -2.442312 | H | 3.391518  | 0.898786 | 0.576597  |

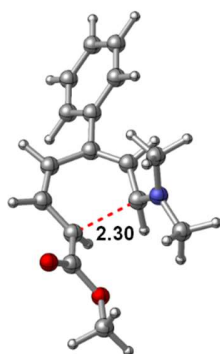

|                                              |                             |
|----------------------------------------------|-----------------------------|
| Zero-point correction=                       | 0.315421 (Hartree/Particle) |
| Thermal correction to Energy=                | 0.334124                    |
| Thermal correction to Enthalpy=              | 0.335069                    |
| Thermal correction to Gibbs Free Energy=     | 0.267411                    |
| Sum of electronic and zero-point Energies=   | -825.403620                 |
| Sum of electronic and thermal Energies=      | -825.384916                 |
| Sum of electronic and thermal Enthalpies=    | -825.383972                 |
| Sum of electronic and thermal Free Energies= | -825.451630                 |

### TS-3b-du

E(scf) = -825.711208173 a.u.

$\nu_{\min} = -604.51 \text{ cm}^{-1}$

|   |           |          |          |   |           |          |           |
|---|-----------|----------|----------|---|-----------|----------|-----------|
| C | -1.825050 | 4.186135 | 0.848739 | H | -1.664171 | 0.982769 | -0.401062 |
| C | -1.251318 | 2.961139 | 0.268977 | C | -3.336650 | 1.678047 | 0.778941  |
| C | -2.038841 | 1.825142 | 0.191413 | H | -3.558946 | 2.170960 | 1.726443  |
| H | -1.152864 | 4.869300 | 1.379900 | C | -3.132471 | 4.527591 | 0.765824  |

|   |           |           |           |   |           |          |           |
|---|-----------|-----------|-----------|---|-----------|----------|-----------|
| C | -4.316408 | 0.720803  | 0.379879  | H | -5.371885 | 4.609845 | 2.036886  |
| O | -5.422861 | 0.559859  | 0.905017  | C | -6.253746 | 3.140284 | -0.901967 |
| O | -3.966396 | 0.010665  | -0.743264 | H | -6.667735 | 2.201740 | -0.507673 |
| C | -4.071772 | 3.738376  | -0.053605 | H | -7.073152 | 3.834686 | -1.142405 |
| H | -3.722556 | 3.443866  | -1.049290 | H | -5.679950 | 2.925772 | -1.811718 |
| H | -3.508344 | 5.431781  | 1.249486  | C | 0.135574  | 2.995644 | -0.228194 |
| C | -4.936512 | -0.897438 | -1.243924 | C | 0.921841  | 1.823424 | -0.336370 |
| H | -5.234683 | -1.635257 | -0.481839 | C | 0.739064  | 4.212486 | -0.626010 |
| H | -5.845186 | -0.370380 | -1.580875 | C | 2.223736  | 1.863951 | -0.837280 |
| H | -4.472627 | -1.410673 | -2.097135 | H | 0.513007  | 0.868716 | 0.001940  |
| N | -5.381921 | 3.748677  | 0.104032  | C | 2.047554  | 4.253367 | -1.112933 |
| C | -6.006217 | 3.980550  | 1.402850  | H | 0.164383  | 5.140826 | -0.577723 |
| H | -6.981305 | 4.466787  | 1.261530  | C | 2.800415  | 3.079282 | -1.227619 |
| H | -6.150648 | 3.003214  | 1.893068  | H | 2.801817  | 0.938065 | -0.906024 |

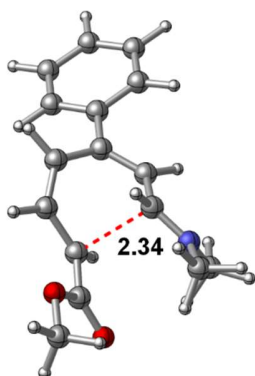

|                                              |                             |
|----------------------------------------------|-----------------------------|
| Zero-point correction=                       | 0.315298 (Hartree/Particle) |
| Thermal correction to Energy=                | 0.333914                    |
| Thermal correction to Enthalpy=              | 0.334858                    |
| Thermal correction to Gibbs Free Energy=     | 0.267777                    |
| Sum of electronic and zero-point Energies=   | -825.395910                 |
| Sum of electronic and thermal Energies=      | -825.377295                 |
| Sum of electronic and thermal Enthalpies=    | -825.376350                 |
| Sum of electronic and thermal Free Energies= | -825.443432                 |

### TS-3b-H-dd

E(scf) = -826.137686527 a.u.

$\nu_{\min}$  = -452.60cm<sup>-1</sup>

|   |           |          |          |   |           |          |          |
|---|-----------|----------|----------|---|-----------|----------|----------|
| C | -1.542681 | 4.262377 | 0.310911 | C | -0.874921 | 3.007683 | 0.383310 |
|---|-----------|----------|----------|---|-----------|----------|----------|

|   |           |           |           |   |           |          |           |
|---|-----------|-----------|-----------|---|-----------|----------|-----------|
| C | -1.471530 | 1.787860  | 0.113027  | C | -5.287790 | 2.310449 | -1.982795 |
| H | -0.881364 | 1.000890  | -0.368424 | H | -5.798090 | 1.764595 | -1.181939 |
| C | -2.839293 | 1.562487  | 0.335683  | H | -5.975491 | 2.503304 | -2.814502 |
| H | -3.239160 | 1.882026  | 1.294466  | H | -4.416895 | 1.744427 | -2.330597 |
| C | -2.830358 | 4.385578  | -0.236228 | C | -5.973409 | 4.517357 | -1.069011 |
| C | -3.476508 | 0.343916  | -0.229660 | H | -6.589103 | 4.682431 | -1.961783 |
| O | -3.018428 | -0.325067 | -1.131150 | H | -6.562052 | 4.020487 | -0.288353 |
| O | -4.656627 | 0.093712  | 0.360511  | H | -5.578430 | 5.469355 | -0.696420 |
| C | -3.870753 | 3.440168  | -0.279673 | H | 0.217350  | 3.056880 | 0.390095  |
| H | -4.451894 | 3.157078  | 0.591954  | C | -0.715786 | 5.489015 | 0.515662  |
| H | -3.000280 | 5.304159  | -0.812521 | C | -0.789216 | 6.610163 | -0.332783 |
| C | -5.375732 | -1.058231 | -0.103828 | C | 0.176443  | 5.531679 | 1.603947  |
| H | -5.615752 | -0.959312 | -1.173493 | C | 0.003770  | 7.735095 | -0.098913 |
| H | -4.777087 | -1.969264 | 0.041661  | H | -1.448506 | 6.602555 | -1.203517 |
| H | -6.294519 | -1.104259 | 0.491746  | C | 0.963369  | 6.661340 | 1.842484  |
| N | -4.818921 | 3.624636  | -1.432352 | H | 0.239785  | 4.677531 | 2.282552  |

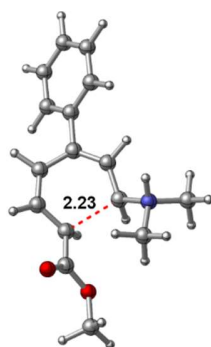

|                                              |                             |
|----------------------------------------------|-----------------------------|
| Zero-point correction=                       | 0.331508 (Hartree/Particle) |
| Thermal correction to Energy=                | 0.349798                    |
| Thermal correction to Enthalpy=              | 0.350742                    |
| Thermal correction to Gibbs Free Energy=     | 0.283867                    |
| Sum of electronic and zero-point Energies=   | -825.806179                 |
| Sum of electronic and thermal Energies=      | -825.787888                 |
| Sum of electronic and thermal Enthalpies=    | -825.786944                 |
| Sum of electronic and thermal Free Energies= | -825.853820                 |

### TS-3b-H-du

E(scf) = -826.134270537 a.u.

$\nu_{\min} = -450.87 \text{ cm}^{-1}$

|   |           |          |          |   |           |          |          |
|---|-----------|----------|----------|---|-----------|----------|----------|
| C | -2.136646 | 4.175484 | 0.329866 | H | -1.672606 | 1.882950 | 2.730891 |
| C | -1.532104 | 3.077089 | 0.993351 | C | -3.518147 | 1.700045 | 1.661624 |
| C | -2.197709 | 2.171720 | 1.810779 | H | -4.019818 | 1.369542 | 2.577599 |

|   |           |           |           |   |           |          |           |
|---|-----------|-----------|-----------|---|-----------|----------|-----------|
| C | -3.521395 | 4.416248  | 0.422986  | H | -7.593665 | 3.130657 | 1.937942  |
| C | -3.937402 | 0.825403  | 0.532638  | H | -6.544435 | 1.864136 | 1.191369  |
| O | -4.915059 | 0.106085  | 0.584506  | C | -6.687233 | 4.303585 | -0.219850 |
| O | -3.151156 | 0.921455  | -0.546534 | H | -6.850729 | 3.434273 | -0.868175 |
| C | -4.500761 | 3.427356  | 0.522556  | H | -7.645238 | 4.690306 | 0.148171  |
| H | -4.592492 | 2.695516  | -0.273477 | H | -6.140674 | 5.084014 | -0.761072 |
| H | -3.822111 | 5.466200  | 0.533646  | H | -0.446832 | 3.135613 | 1.110763  |
| C | -3.502421 | 0.110324  | -1.677541 | C | -1.286803 | 5.272067 | -0.207883 |
| H | -3.465299 | -0.956235 | -1.412060 | C | -1.746929 | 6.010543 | -1.317022 |
| H | -4.515110 | 0.355731  | -2.030556 | C | -0.036472 | 5.611437 | 0.347166  |
| H | -2.761485 | 0.337240  | -2.452550 | C | -0.982614 | 7.047527 | -1.857049 |
| N | -5.857924 | 3.861422  | 0.956494  | H | -2.703074 | 5.748540 | -1.776456 |
| C | -6.563499 | 2.802454  | 1.757843  | C | 0.726007  | 6.648314 | -0.192680 |
| H | -6.032550 | 2.675073  | 2.706729  | H | 0.335193  | 5.083492 | 1.227455  |

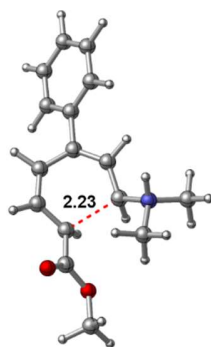

|                                              |                             |
|----------------------------------------------|-----------------------------|
| Zero-point correction=                       | 0.331511 (Hartree/Particle) |
| Thermal correction to Energy=                | 0.349630                    |
| Thermal correction to Enthalpy=              | 0.350574                    |
| Thermal correction to Gibbs Free Energy=     | 0.284589                    |
| Sum of electronic and zero-point Energies=   | -825.802759                 |
| Sum of electronic and thermal Energies=      | -825.784640                 |
| Sum of electronic and thermal Enthalpies=    | -825.783696                 |
| Sum of electronic and thermal Free Energies= | -825.849681                 |

### TS-3b-H-ud

E(scf) = -826.134117172 a.u.

$\nu_{\min} = -462.23 \text{ cm}^{-1}$

|   |           |          |           |   |           |          |           |
|---|-----------|----------|-----------|---|-----------|----------|-----------|
| C | -1.362173 | 4.544251 | 0.214540  | C | -3.042853 | 1.925962 | -0.281644 |
| C | -0.918540 | 3.201603 | 0.131098  | H | -3.502552 | 1.318830 | -1.070064 |
| C | -1.656180 | 2.138666 | -0.385703 | C | -2.658972 | 4.912112 | -0.203955 |
| H | -1.102247 | 1.453162 | -1.041107 | C | -3.729876 | 1.651844 | 1.009200  |



|   |           |          |           |   |           |          |           |
|---|-----------|----------|-----------|---|-----------|----------|-----------|
| O | -4.803121 | 1.086472 | 1.074443  | H | -3.850665 | 4.761668 | -2.657240 |
| O | -3.063256 | 2.091858 | 2.083862  | C | -6.206082 | 3.711110 | -0.405271 |
| C | -3.788419 | 4.113753 | -0.060185 | H | -7.050610 | 3.974928 | -1.051512 |
| H | -4.074066 | 3.783556 | 0.931384  | H | -6.003930 | 2.634606 | -0.444611 |
| H | -2.735691 | 5.843527 | -0.778818 | H | -6.411412 | 4.011710 | 0.628975  |
| C | -3.668568 | 1.853699 | 3.363662  | H | 0.164136  | 3.059533 | 0.186411  |
| H | -4.658543 | 2.330486 | 3.418901  | C | -0.378867 | 5.639028 | 0.433321  |
| H | -3.781243 | 0.774125 | 3.540360  | C | -0.807141 | 6.821817 | 1.069683  |
| H | -2.990355 | 2.293327 | 4.103854  | C | 0.967388  | 5.551123 | 0.025355  |
| N | -4.987393 | 4.443347 | -0.886211 | C | 0.078984  | 7.877482 | 1.296322  |
| C | -4.747524 | 4.212229 | -2.351001 | H | -1.841219 | 6.901648 | 1.413522  |
| H | -4.599552 | 3.137474 | -2.503753 | C | 1.851801  | 6.606846 | 0.251618  |
| H | -5.621085 | 4.567481 | -2.910081 | H | 1.325183  | 4.664495 | -0.501494 |

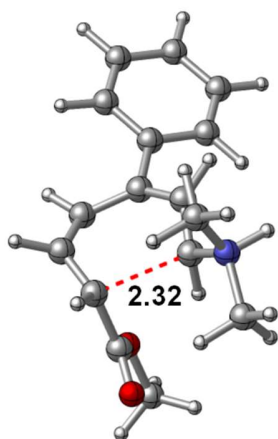

|                                              |                             |
|----------------------------------------------|-----------------------------|
| Zero-point correction=                       | 0.331202 (Hartree/Particle) |
| Thermal correction to Energy=                | 0.349383                    |
| Thermal correction to Enthalpy=              | 0.350328                    |
| Thermal correction to Gibbs Free Energy=     | 0.284409                    |
| Sum of electronic and zero-point Energies=   | -825.802915                 |
| Sum of electronic and thermal Energies=      | -825.784734                 |
| Sum of electronic and thermal Enthalpies=    | -825.783790                 |
| Sum of electronic and thermal Free Energies= | -825.849708                 |

### TS-3b-H-uu

E(scf) = -826.140727266 a.u.

$\nu_{\min} = -464.38 \text{ cm}^{-1}$

|   |           |           |           |   |           |          |           |
|---|-----------|-----------|-----------|---|-----------|----------|-----------|
| C | -1.353401 | 4.564919  | 1.216503  | N | -5.090750 | 4.493171 | 0.670013  |
| C | -1.040355 | 3.291752  | 1.756961  | C | -5.446280 | 4.372862 | 2.126156  |
| C | -1.943536 | 2.248399  | 1.914730  | H | -5.404860 | 3.315544 | 2.410808  |
| H | -1.861837 | 1.631196  | 2.817001  | H | -4.716652 | 4.940939 | 2.713834  |
| C | -3.019076 | 2.001600  | 1.045274  | H | -6.454168 | 4.777667 | 2.275141  |
| H | -2.807227 | 1.940590  | -0.017788 | C | -6.068609 | 3.773385 | -0.209413 |
| C | -2.679872 | 4.911489  | 0.882976  | H | -5.959078 | 2.696960 | -0.038446 |
| C | -4.124844 | 1.124751  | 1.515251  | H | -7.082025 | 4.105109 | 0.043294  |
| O | -4.387671 | 0.910368  | 2.680380  | H | -5.842069 | 4.012023 | -1.255348 |
| O | -4.839454 | 0.632379  | 0.489586  | H | -0.101473 | 3.226835 | 2.312665  |
| C | -3.679381 | 4.059572  | 0.403441  | C | -0.366005 | 5.675056 | 1.307745  |
| H | -3.607284 | 3.587530  | -0.569198 | C | 0.600903  | 5.755842 | 2.329982  |
| H | -2.977803 | 5.928005  | 1.174238  | C | -0.397057 | 6.696380 | 0.336858  |
| C | -5.940719 | -0.226048 | 0.826572  | C | 1.504145  | 6.818819 | 2.374937  |
| H | -5.581998 | -1.112436 | 1.369755  | H | 0.633795  | 5.000613 | 3.117411  |
| H | -6.667946 | 0.307721  | 1.456582  | C | 0.508377  | 7.759190 | 0.381918  |
| H | -6.398985 | -0.519466 | -0.124658 | H | -1.123698 | 6.640388 | -0.477268 |

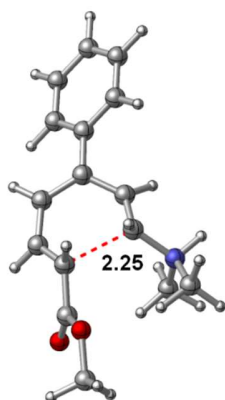

|                                              |                             |
|----------------------------------------------|-----------------------------|
| Zero-point correction=                       | 0.331649 (Hartree/Particle) |
| Thermal correction to Energy=                | 0.349785                    |
| Thermal correction to Enthalpy=              | 0.350730                    |
| Thermal correction to Gibbs Free Energy=     | 0.284833                    |
| Sum of electronic and zero-point Energies=   | -825.809078                 |
| Sum of electronic and thermal Energies=      | -825.790942                 |
| Sum of electronic and thermal Enthalpies=    | -825.789998                 |
| Sum of electronic and thermal Free Energies= | -825.855894                 |

**TS-3b-OH-dd'**

E(scf) = -826.148431900 a.u.

$v_{\min} = -318.87 \text{ cm}^{-1}$

|   |           |           |           |   |           |          |           |
|---|-----------|-----------|-----------|---|-----------|----------|-----------|
| C | -1.699789 | 4.302640  | 0.139861  | H | -4.520623 | 4.188121 | -3.188866 |
| C | -1.091762 | 3.030920  | -0.283235 | H | -2.988131 | 4.216815 | -2.269526 |
| C | -1.721128 | 1.843961  | -0.172074 | C | -5.885780 | 2.629528 | -1.472174 |
| H | -1.241709 | 0.945121  | -0.577580 | H | -5.718495 | 1.619665 | -1.885053 |
| C | -3.013648 | 1.734280  | 0.527101  | H | -6.424133 | 2.543579 | -0.519245 |
| H | -3.024769 | 2.060323  | 1.572894  | H | -6.514664 | 3.186728 | -2.182902 |
| C | -3.046778 | 4.425905  | 0.244539  | H | -0.098786 | 3.074541 | -0.736382 |
| C | -3.872497 | 0.644535  | 0.289048  | C | -0.798194 | 5.460155 | 0.388088  |
| O | -3.844009 | -0.112661 | -0.785347 | C | -1.176965 | 6.773992 | 0.051749  |
| O | -4.838894 | 0.399626  | 1.126169  | C | 0.465428  | 5.256840 | 0.975006  |
| C | -4.067117 | 3.375099  | -0.046140 | C | -0.325678 | 7.850547 | 0.308575  |
| H | -4.806163 | 3.242002  | 0.750120  | H | -2.136719 | 6.952937 | -0.438230 |
| H | -3.491307 | 5.387725  | 0.519597  | C | 1.315084  | 6.334898 | 1.235914  |
| C | -5.811016 | -0.632992 | 0.841989  | H | 0.779911  | 4.246853 | 1.248919  |
| H | -6.361025 | -0.387536 | -0.077556 | C | 0.922582  | 7.635737 | 0.904164  |
| H | -5.309307 | -1.603526 | 0.732178  | H | -0.634326 | 8.861917 | 0.032691  |
| H | -6.484936 | -0.639175 | 1.704376  | H | 2.287533  | 6.157135 | 1.701657  |
| N | -4.622396 | 3.330175  | -1.276274 | H | 1.589170  | 8.478597 | 1.102487  |
| C | -3.879693 | 3.622203  | -2.495912 | H | -3.095270 | 0.099882 | -1.368546 |
| H | -3.569880 | 2.688138  | -2.996599 |   |           |          |           |

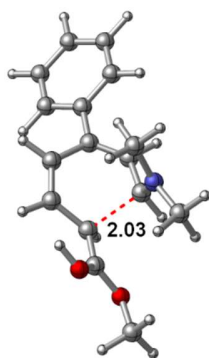

|                                            |                             |
|--------------------------------------------|-----------------------------|
| Zero-point correction=                     | 0.329477 (Hartree/Particle) |
| Thermal correction to Energy=              | 0.347983                    |
| Thermal correction to Enthalpy=            | 0.348927                    |
| Thermal correction to Gibbs Free Energy=   | 0.282336                    |
| Sum of electronic and zero-point Energies= | -825.818955                 |
| Sum of electronic and thermal Energies=    | -825.800449                 |
| Sum of electronic and thermal Enthalpies=  | -825.799505                 |

Sum of electronic and thermal Free Energies= -825.866096

**TS-3b-OH-du'**

E(scf) = -826.143737584 a.u.

$\nu_{\min} = -393.10\text{cm}^{-1}$

|   |           |           |           |   |           |          |           |
|---|-----------|-----------|-----------|---|-----------|----------|-----------|
| C | -2.067592 | 4.467961  | -0.313668 | N | -5.567331 | 3.297520 | -0.109783 |
| C | -1.341620 | 3.192514  | -0.166296 | C | -6.475816 | 2.284428 | -0.628968 |
| C | -1.888905 | 2.117522  | 0.431114  | H | -5.958601 | 1.649293 | -1.360385 |
| H | -1.326542 | 1.182295  | 0.498635  | H | -6.876294 | 1.648460 | 0.177150  |
| C | -3.253867 | 2.166905  | 1.021257  | H | -7.328478 | 2.770576 | -1.130549 |
| H | -3.398942 | 2.858959  | 1.859512  | C | -6.108125 | 4.132030 | 0.953197  |
| C | -3.424073 | 4.456501  | -0.311295 | H | -5.441424 | 4.975622 | 1.169199  |
| C | -3.969697 | 0.968647  | 1.185302  | H | -7.090283 | 4.526326 | 0.652453  |
| O | -5.018703 | 0.968295  | 1.980038  | H | -6.235800 | 3.546637 | 1.881599  |
| O | -3.639915 | -0.078650 | 0.475169  | H | -0.318352 | 3.135365 | -0.544292 |
| C | -4.229355 | 3.201152  | -0.328361 | C | -1.290976 | 5.725211 | -0.446003 |
| H | -3.983520 | 2.534701  | -1.167354 | C | -1.779042 | 6.813360 | -1.196947 |
| H | -3.985359 | 5.390706  | -0.366365 | C | -0.040935 | 5.859585 | 0.190027  |
| C | -4.381895 | -1.313994 | 0.527767  | C | -1.049505 | 7.999221 | -1.294571 |
| H | -4.349400 | -1.738281 | 1.542943  | H | -2.727150 | 6.721009 | -1.731330 |
| H | -5.418927 | -1.160257 | 0.191487  | C | 0.686694  | 7.048350 | 0.094983  |
| H | -3.872057 | -1.990601 | -0.165654 | H | 0.357944  | 5.034184 | 0.784204  |

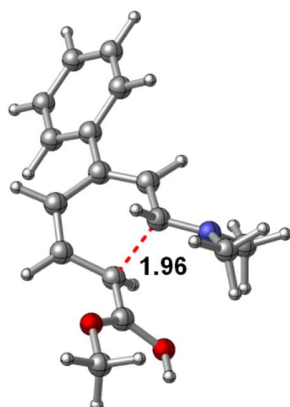

Zero-point correction= 0.328909 (Hartree/Particle)

Thermal correction to Energy= 0.347614

Thermal correction to Enthalpy= 0.348558

Thermal correction to Gibbs Free Energy= 0.281824

Sum of electronic and zero-point Energies= -825.814828

Sum of electronic and thermal Energies= -825.796123  
 Sum of electronic and thermal Enthalpies= -825.795179  
 Sum of electronic and thermal Free Energies= -825.861913

**TS-3b-OH-ud'**

E(scf) = -826.146344756 a.u.

$\nu_{\min} = -239.51\text{cm}^{-1}$

|   |           |          |           |   |           |          |           |
|---|-----------|----------|-----------|---|-----------|----------|-----------|
| C | -1.797971 | 4.521436 | 0.022530  | N | -4.820461 | 3.951592 | -1.357924 |
| C | -1.372698 | 3.250986 | -0.592003 | C | -4.055883 | 4.193955 | -2.574873 |
| C | -2.112009 | 2.127090 | -0.575851 | H | -3.739306 | 3.236982 | -3.025640 |
| H | -1.753267 | 1.239488 | -1.107680 | H | -4.686633 | 4.731014 | -3.297965 |
| C | -3.404385 | 2.010119 | 0.137570  | H | -3.166660 | 4.794903 | -2.354729 |
| H | -4.171392 | 1.392169 | -0.340635 | C | -6.115703 | 3.313970 | -1.558424 |
| C | -3.108674 | 4.815566 | 0.190253  | H | -6.707467 | 3.895611 | -2.280286 |
| C | -3.453306 | 1.979940 | 1.539135  | H | -5.989202 | 2.292123 | -1.959256 |
| O | -4.522646 | 1.631087 | 2.230918  | H | -6.663767 | 3.258761 | -0.608760 |
| O | -2.463114 | 2.445555 | 2.245747  | H | -0.397235 | 3.231109 | -1.083181 |
| C | -4.254944 | 3.929976 | -0.139643 | C | -0.750539 | 5.486921 | 0.451120  |
| H | -4.989968 | 3.825987 | 0.665729  | C | -0.867169 | 6.155659 | 1.684785  |
| H | -3.404710 | 5.787620 | 0.598382  | C | 0.374563  | 5.751768 | -0.352800 |
| C | -2.576699 | 2.577257 | 3.678915  | C | 0.103314  | 7.072546 | 2.095421  |
| H | -3.408858 | 3.248250 | 3.931674  | H | -1.715532 | 5.934264 | 2.336501  |
| H | -2.734454 | 1.592353 | 4.139118  | C | 1.340828  | 6.674203 | 0.055995  |
| H | -1.623909 | 3.007993 | 4.003528  | H | 0.487030  | 5.254776 | -1.318910 |

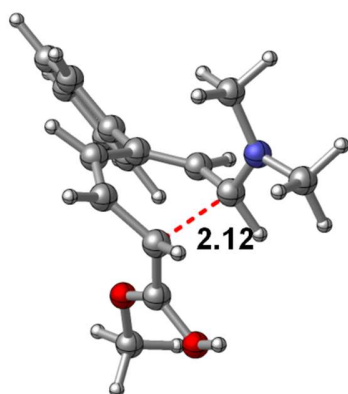

Zero-point correction= 0.329256 (Hartree/Particle)  
 Thermal correction to Energy= 0.347878

|                                              |             |
|----------------------------------------------|-------------|
| Thermal correction to Enthalpy=              | 0.348822    |
| Thermal correction to Gibbs Free Energy=     | 0.282088    |
| Sum of electronic and zero-point Energies=   | -825.817089 |
| Sum of electronic and thermal Energies=      | -825.798467 |
| Sum of electronic and thermal Enthalpies=    | -825.797523 |
| Sum of electronic and thermal Free Energies= | -825.864256 |

### TS-3b-OH-uu'

E(scf) = -826.147456903 a.u.

$\nu_{\min} = -288.49\text{cm}^{-1}$

|   |           |           |           |   |           |          |           |
|---|-----------|-----------|-----------|---|-----------|----------|-----------|
| C | -1.616855 | 4.639521  | 1.350444  | N | -4.978779 | 4.135521 | 1.261724  |
| C | -1.478307 | 3.525118  | 2.298753  | C | -4.892741 | 4.734812 | 2.587851  |
| C | -2.142760 | 2.359656  | 2.161237  | H | -5.012728 | 3.963974 | 3.369094  |
| H | -2.034119 | 1.590149  | 2.934848  | H | -3.925692 | 5.231381 | 2.722207  |
| C | -2.942046 | 2.080760  | 0.956225  | H | -5.696456 | 5.476805 | 2.708508  |
| H | -2.405371 | 2.118008  | 0.002110  | C | -6.263445 | 3.526007 | 0.939670  |
| C | -2.719310 | 4.762877  | 0.568929  | H | -6.472704 | 2.673198 | 1.608222  |
| C | -3.960846 | 1.111230  | 0.969747  | H | -7.069372 | 4.264283 | 1.068359  |
| O | -4.568081 | 0.674207  | 2.051470  | H | -6.268145 | 3.176868 | -0.101020 |
| O | -4.427038 | 0.658931  | -0.159314 | H | -0.802361 | 3.655434 | 3.145889  |
| C | -3.893651 | 3.844743  | 0.516631  | C | -0.550247 | 5.678464 | 1.304546  |
| H | -4.153462 | 3.500759  | -0.489580 | C | 0.060431  | 6.149212 | 2.482608  |
| H | -2.853290 | 5.662355  | -0.041762 | C | -0.137218 | 6.220747 | 0.072627  |
| C | -5.553848 | -0.247228 | -0.176663 | C | 1.039640  | 7.144352 | 2.429891  |
| H | -5.314322 | -1.158418 | 0.387474  | H | -0.247139 | 5.757301 | 3.454517  |
| H | -6.436806 | 0.242543  | 0.257905  | C | 0.846212  | 7.211295 | 0.020743  |
| H | -5.721890 | -0.477702 | -1.233376 | H | -0.576360 | 5.845001 | -0.854405 |

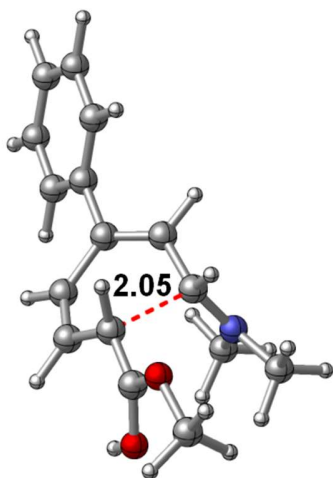

|                                              |                             |
|----------------------------------------------|-----------------------------|
| Zero-point correction=                       | 0.329313 (Hartree/Particle) |
| Thermal correction to Energy=                | 0.347853                    |
| Thermal correction to Enthalpy=              | 0.348797                    |
| Thermal correction to Gibbs Free Energy=     | 0.282244                    |
| Sum of electronic and zero-point Energies=   | -825.818144                 |
| Sum of electronic and thermal Energies=      | -825.799604                 |
| Sum of electronic and thermal Enthalpies=    | -825.798660                 |
| Sum of electronic and thermal Free Energies= | -825.865213                 |

### TS-3b-ud

E(scf) = -825.711936346 a.u.

$\nu_{\min} = -334.00\text{cm}^{-1}$

|   |           |          |           |   |           |          |           |
|---|-----------|----------|-----------|---|-----------|----------|-----------|
| C | -1.425807 | 4.442958 | 0.218764  | N | -4.907847 | 4.194016 | -0.997581 |
| C | -0.905098 | 3.107922 | 0.101912  | C | -4.630176 | 4.595298 | -2.366625 |
| C | -1.628663 | 2.002677 | -0.279339 | H | -4.703113 | 3.724358 | -3.045779 |
| H | -1.082590 | 1.218903 | -0.824736 | H | -5.357664 | 5.352222 | -2.700303 |
| C | -3.032504 | 1.815431 | -0.105978 | H | -3.621434 | 5.016586 | -2.450226 |
| H | -3.533491 | 1.159932 | -0.827620 | C | -6.181264 | 3.520553 | -0.802909 |
| C | -2.727855 | 4.810935 | -0.077850 | H | -7.007442 | 4.159017 | -1.153167 |
| C | -3.662647 | 1.672518 | 1.204480  | H | -6.213473 | 2.570488 | -1.369154 |
| O | -4.747699 | 1.141414 | 1.395391  | H | -6.329537 | 3.285947 | 0.259115  |
| O | -2.956645 | 2.224140 | 2.224145  | H | 0.185054  | 3.023783 | 0.090651  |
| C | -3.916527 | 3.997083 | -0.097974 | C | -0.446218 | 5.554970 | 0.422498  |
| H | -4.279644 | 3.662893 | 0.869207  | C | -0.792796 | 6.647639 | 1.241459  |
| H | -2.876843 | 5.844144 | -0.413075 | C | 0.823681  | 5.564112 | -0.187822 |
| C | -3.541761 | 2.136852 | 3.521319  | C | 0.094382  | 7.708428 | 1.445069  |
| H | -4.522467 | 2.637646 | 3.549760  | H | -1.765861 | 6.650410 | 1.738259  |
| H | -3.679934 | 1.087610 | 3.825959  | C | 1.710382  | 6.624840 | 0.012954  |
| H | -2.845570 | 2.637642 | 4.206112  | H | 1.113904  | 4.745124 | -0.849381 |

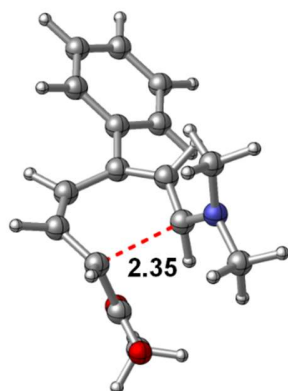

|                                              |                             |
|----------------------------------------------|-----------------------------|
| Zero-point correction=                       | 0.315371 (Hartree/Particle) |
| Thermal correction to Energy=                | 0.334058                    |
| Thermal correction to Enthalpy=              | 0.335002                    |
| Thermal correction to Gibbs Free Energy=     | 0.267122                    |
| Sum of electronic and zero-point Energies=   | -825.396565                 |
| Sum of electronic and thermal Energies=      | -825.377879                 |
| Sum of electronic and thermal Enthalpies=    | -825.376934                 |
| Sum of electronic and thermal Free Energies= | -825.444814                 |

### TS-3b-uu

E(scf) = -825.719525678 a.u.

$\nu_{\min} = -292.22\text{cm}^{-1}$

|   |           |           |           |   |           |          |           |
|---|-----------|-----------|-----------|---|-----------|----------|-----------|
| C | -1.422207 | 4.469523  | 1.262841  | N | -5.042100 | 4.189452 | 1.022262  |
| C | -1.050753 | 3.254791  | 1.934769  | C | -5.212285 | 4.922239 | 2.265601  |
| C | -1.856240 | 2.138812  | 1.988745  | H | -5.858497 | 4.350218 | 2.953609  |
| H | -1.771928 | 1.447589  | 2.836894  | H | -4.237883 | 5.082347 | 2.744770  |
| C | -2.838093 | 1.891962  | 1.000525  | H | -5.684457 | 5.904458 | 2.090813  |
| H | -2.533585 | 2.014737  | -0.037058 | C | -6.254479 | 3.631609 | 0.447019  |
| C | -2.694107 | 4.757677  | 0.778512  | H | -6.743678 | 2.944641 | 1.160183  |
| C | -3.927736 | 0.954629  | 1.242733  | H | -6.971824 | 4.432910 | 0.200716  |
| O | -4.238969 | 0.465902  | 2.316173  | H | -6.016730 | 3.071576 | -0.465742 |
| O | -4.641882 | 0.715042  | 0.107875  | H | -0.162511 | 3.296482 | 2.569903  |
| C | -3.824932 | 3.889596  | 0.518610  | C | -0.456403 | 5.612467 | 1.302562  |
| H | -3.879914 | 3.343473  | -0.419172 | C | 0.325462  | 5.896350 | 2.439683  |
| H | -2.952787 | 5.823688  | 0.751424  | C | -0.319333 | 6.453417 | 0.180951  |
| C | -5.791171 | -0.115824 | 0.247735  | C | 1.207850  | 6.979433 | 2.453586  |
| H | -5.519698 | -1.108513 | 0.639110  | H | 0.225524  | 5.279466 | 3.335231  |
| H | -6.524687 | 0.337449  | 0.934333  | C | 0.565620  | 7.535508 | 0.192317  |
| H | -6.228258 | -0.212651 | -0.754161 | H | -0.904805 | 6.240031 | -0.716466 |





|                                              |                             |
|----------------------------------------------|-----------------------------|
| Zero-point correction=                       | 0.315467 (Hartree/Particle) |
| Thermal correction to Energy=                | 0.334150                    |
| Thermal correction to Enthalpy=              | 0.335094                    |
| Thermal correction to Gibbs Free Energy=     | 0.267470                    |
| Sum of electronic and zero-point Energies=   | -825.404059                 |
| Sum of electronic and thermal Energies=      | -825.385376                 |
| Sum of electronic and thermal Enthalpies=    | -825.384431                 |
| Sum of electronic and thermal Free Energies= | -825.452055                 |

### 3a-CN

E(scf) = -917.942063716 a.u.

$\nu_{\min} = 30.77 \text{ cm}^{-1}$

|   |           |           |           |   |           |           |           |
|---|-----------|-----------|-----------|---|-----------|-----------|-----------|
| C | -0.161761 | 2.243007  | 0.424137  | H | -6.846675 | -0.808015 | -0.658667 |
| C | -1.497747 | 2.604919  | 0.383825  | H | -7.812986 | 0.528538  | -1.382774 |
| C | -2.461018 | 1.635273  | -0.071618 | N | 3.352013  | 3.114793  | 1.243359  |
| H | 0.066752  | 1.225352  | 0.082948  | C | 3.301319  | 4.470753  | 1.766198  |
| H | -2.060506 | 0.645789  | -0.322820 | H | 2.868757  | 5.163729  | 1.024866  |
| C | -3.802148 | 1.795434  | -0.248720 | H | 2.686839  | 4.521756  | 2.681600  |
| H | -4.310927 | 2.738940  | -0.045631 | H | 4.316441  | 4.808717  | 2.008175  |
| C | 0.945400  | 3.011830  | 0.873973  | C | 4.646467  | 2.453855  | 1.191531  |
| C | -4.624368 | 0.687955  | -0.738605 | H | 5.351039  | 3.020123  | 0.559207  |
| O | -4.241373 | -0.437606 | -1.012599 | H | 5.084642  | 2.365641  | 2.200417  |
| O | -5.922641 | 1.057609  | -0.865020 | H | 4.536728  | 1.445268  | 0.771750  |
| C | 2.225941  | 2.494731  | 0.847026  | C | -1.947876 | 3.964108  | 0.796233  |
| H | 2.374586  | 1.478105  | 0.467539  | C | -2.889063 | 4.130762  | 1.831222  |
| H | 0.770653  | 4.020119  | 1.252125  | C | -1.445002 | 5.116723  | 0.161978  |
| C | -6.822561 | 0.058148  | -1.338866 | C | -3.310131 | 5.397320  | 2.226970  |
| H | -6.529146 | -0.297101 | -2.339437 | H | -3.290026 | 3.249693  | 2.336012  |

|   |           |          |           |   |           |          |          |
|---|-----------|----------|-----------|---|-----------|----------|----------|
| C | -1.856180 | 6.390641 | 0.545710  | H | -4.034792 | 5.508516 | 3.035851 |
| H | -0.723001 | 5.006805 | -0.649634 | H | -1.458840 | 7.272941 | 0.040219 |
| C | -2.794444 | 6.540349 | 1.585105  | C | -3.223029 | 7.849033 | 1.987253 |

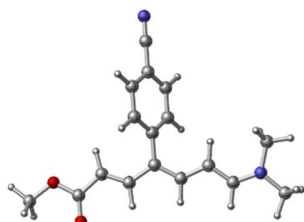

Zero-point correction= 0.315475 (Hartree/Particle)

Thermal correction to Energy= 0.336941

Thermal correction to Enthalpy= 0.337885

Thermal correction to Gibbs Free Energy= 0.262229

Sum of electronic and zero-point Energies= -917.626589

Sum of electronic and thermal Energies= -917.605123

Sum of electronic and thermal Enthalpies= -917.604179

Sum of electronic and thermal Free Energies= -917.6798

### 3a-NMe<sub>2</sub>

E(scf) = -959.644321276 a.u.

$\nu_{\min} = 22.16 \text{ cm}^{-1}$

|   |           |           |           |   |           |          |           |
|---|-----------|-----------|-----------|---|-----------|----------|-----------|
| C | -0.158732 | 2.216616  | 0.411813  | C | 3.289891  | 4.469058 | 1.761959  |
| C | -1.491391 | 2.586337  | 0.377554  | H | 2.815251  | 5.155933 | 1.040924  |
| C | -2.450783 | 1.615659  | -0.083908 | H | 2.704351  | 4.501788 | 2.698020  |
| H | 0.073385  | 1.203802  | 0.057546  | H | 4.303769  | 4.832186 | 1.971933  |
| H | -2.052807 | 0.625593  | -0.338278 | C | 4.650113  | 2.457413 | 1.211995  |
| C | -3.793529 | 1.778813  | -0.254769 | H | 5.382274  | 3.037032 | 0.624644  |
| H | -4.293786 | 2.724149  | -0.039976 | H | 5.049550  | 2.337816 | 2.234621  |
| C | 0.948946  | 2.988883  | 0.865667  | H | 4.555911  | 1.460948 | 0.760167  |
| C | -4.622103 | 0.679048  | -0.745427 | C | -1.941073 | 3.947700 | 0.790564  |
| O | -4.248608 | -0.448254 | -1.028614 | C | -2.864438 | 4.135538 | 1.834499  |
| O | -5.921769 | 1.054322  | -0.862850 | C | -1.463447 | 5.107298 | 0.155408  |
| C | 2.232465  | 2.487316  | 0.832241  | C | -3.287096 | 5.402390 | 2.232263  |
| H | 2.392912  | 1.474513  | 0.446944  | H | -3.263462 | 3.261676 | 2.356353  |
| H | 0.760831  | 3.992671  | 1.249714  | C | -1.871677 | 6.384726 | 0.535733  |
| C | -6.826517 | 0.060303  | -1.336393 | H | -0.750603 | 5.006863 | -0.667519 |
| H | -6.540565 | -0.291461 | -2.340522 | C | -2.799562 | 6.573137 | 1.593498  |
| H | -6.849943 | -0.809862 | -0.661051 | H | -4.001348 | 5.476148 | 3.051530  |
| H | -7.816243 | 0.533191  | -1.372526 | H | -1.465341 | 7.239988 | -0.003075 |
| N | 3.357169  | 3.120376  | 1.226766  | N | -3.209272 | 7.832704 | 1.981396  |

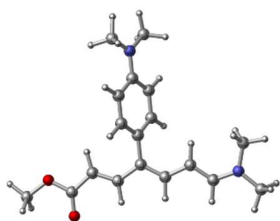

|                                              |                             |
|----------------------------------------------|-----------------------------|
| Zero-point correction=                       | 0.388933 (Hartree/Particle) |
| Thermal correction to Energy=                | 0.413152                    |
| Thermal correction to Enthalpy=              | 0.414096                    |
| Thermal correction to Gibbs Free Energy=     | 0.331359                    |
| Sum of electronic and zero-point Energies=   | -959.255389                 |
| Sum of electronic and thermal Energies=      | -959.231170                 |
| Sum of electronic and thermal Enthalpies=    | -959.230225                 |
| Sum of electronic and thermal Free Energies= | -959.312963                 |

### 3a-OH-Cl

E(scf) = -1286.46489884 a.u.

$\nu_{\min} = 21.77 \text{ cm}^{-1}$

|   |           |           |           |   |           |          |           |
|---|-----------|-----------|-----------|---|-----------|----------|-----------|
| C | -1.372853 | 4.504752  | 0.954385  | H | -4.333828 | 3.257382 | 3.105109  |
| C | -1.134815 | 3.384607  | 1.885571  | H | -3.455857 | 4.787617 | 2.755838  |
| C | -1.957787 | 2.313829  | 1.818970  | H | -5.205979 | 4.832072 | 3.111116  |
| H | -1.878377 | 1.483026  | 2.521678  | C | -6.051326 | 3.491792 | 0.985713  |
| C | -2.996139 | 2.214186  | 0.735142  | H | -6.154639 | 2.575687 | 1.579330  |
| H | -2.481492 | 1.884017  | -0.188118 | H | -6.807510 | 4.223127 | 1.300416  |
| C | -2.502835 | 4.617756  | 0.233765  | H | -6.187991 | 3.271840 | -0.079027 |
| C | -4.052175 | 1.157427  | 1.015747  | H | -0.610059 | 5.283248 | 0.877113  |
| O | -4.297338 | 0.687948  | 2.103652  | C | -0.044503 | 3.489659 | 2.888298  |
| O | -4.702696 | 0.826424  | -0.103878 | C | 0.673385  | 2.350724 | 3.303419  |
| C | -3.598584 | 3.579940  | 0.322953  | C | 0.288384  | 4.732118 | 3.462701  |
| H | -4.067125 | 3.461787  | -0.662564 | C | 1.678489  | 2.448632 | 4.267714  |
| H | -2.712757 | 5.498194  | -0.375772 | H | 0.454761  | 1.381928 | 2.848587  |
| C | -5.758676 | -0.138570 | 0.015891  | C | 1.293693  | 4.829630 | 4.428670  |
| H | -5.376629 | -1.075686 | 0.445626  | H | -0.258240 | 5.631447 | 3.169233  |
| H | -6.562865 | 0.248214  | 0.659867  | C | 1.992945  | 3.688752 | 4.835666  |
| H | -6.133701 | -0.305464 | -1.000112 | H | 2.227031  | 1.552821 | 4.569924  |
| N | -4.718708 | 4.117585  | 1.197225  | H | 1.528843  | 5.802627 | 4.867478  |
| C | -4.402796 | 4.249666  | 2.641221  | H | 2.782454  | 3.765718 | 5.587365  |

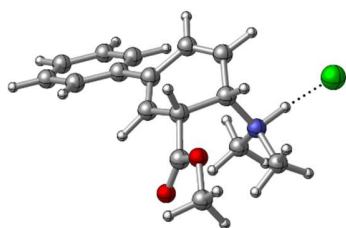

|                                              |                             |
|----------------------------------------------|-----------------------------|
| Zero-point correction=                       | 0.332894 (Hartree/Particle) |
| Thermal correction to Energy=                | 0.352940                    |
| Thermal correction to Enthalpy=              | 0.353884                    |
| Thermal correction to Gibbs Free Energy=     | 0.282362                    |
| Sum of electronic and zero-point Energies=   | -1286.132005                |
| Sum of electronic and thermal Energies=      | -1286.111959                |
| Sum of electronic and thermal Enthalpies=    | -1286.111015                |
| Sum of electronic and thermal Free Energies= | -1286.182537                |

### 3b-CN

E(scf) = -917.939234334 a.u.

$\nu_{\min} = 24.62 \text{ cm}^{-1}$

|   |           |           |           |   |           |           |           |
|---|-----------|-----------|-----------|---|-----------|-----------|-----------|
| C | 0.185701  | 2.630576  | -0.753421 | H | 2.062141  | 3.669819  | -4.409342 |
| C | -1.181832 | 2.480275  | -0.882145 | H | 1.754284  | 5.306091  | -3.763267 |
| C | -2.040451 | 1.822030  | 0.050622  | H | 3.322194  | 4.928255  | -4.531384 |
| H | -1.593188 | 1.381252  | 0.947956  | C | 4.485580  | 4.421290  | -2.359545 |
| C | -3.390697 | 1.686075  | -0.080266 | H | 5.133373  | 3.947760  | -3.116616 |
| H | -3.929204 | 2.093473  | -0.939659 | H | 4.669961  | 5.509564  | -2.382751 |
| C | 0.964884  | 3.259949  | -1.784484 | H | 4.775833  | 4.043073  | -1.370334 |
| C | -4.174646 | 0.983896  | 0.936290  | H | -1.648944 | 2.881911  | -1.788630 |
| O | -3.744399 | 0.469441  | 1.955627  | C | 0.881603  | 2.131869  | 0.473249  |
| O | -5.492261 | 0.961137  | 0.618027  | C | 0.665063  | 2.744417  | 1.719580  |
| C | 2.310073  | 3.538808  | -1.677742 | C | 1.766937  | 1.041753  | 0.397873  |
| H | 2.838112  | 3.278775  | -0.756483 | C | 1.310515  | 2.283548  | 2.865311  |
| H | 0.423162  | 3.548819  | -2.688010 | H | -0.018499 | 3.592999  | 1.787290  |
| C | -6.354923 | 0.300888  | 1.541864  | C | 2.415146  | 0.566816  | 1.535401  |
| H | -6.075348 | -0.758314 | 1.657850  | H | 1.942063  | 0.559122  | -0.565744 |
| H | -6.313750 | 0.778732  | 2.533583  | C | 2.190807  | 1.188714  | 2.778885  |
| H | -7.368764 | 0.378701  | 1.129289  | H | 1.136066  | 2.767741  | 3.827828  |
| N | 3.086233  | 4.121224  | -2.614671 | H | 3.093787  | -0.285348 | 1.467310  |
| C | 2.526061  | 4.526760  | -3.892097 | C | 2.859532  | 0.707820  | 3.954635  |

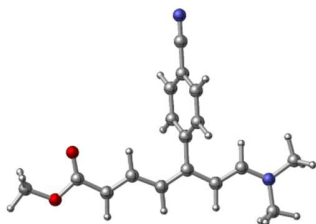

Zero-point correction= 0.315037 (Hartree/Particle)  
 Thermal correction to Energy= 0.336667  
 Thermal correction to Enthalpy= 0.337611  
 Thermal correction to Gibbs Free Energy= 0.261096  
 Sum of electronic and zero-point Energies= -917.624197  
 Sum of electronic and thermal Energies= -917.602568  
 Sum of electronic and thermal Enthalpies= -917.601624  
 Sum of electronic and thermal Free Energies= -917.678138

### 3b-NMe<sub>2</sub>

E(scf) = -959.643747074 a.u.

$\nu_{\min} = 24.82\text{cm}^{-1}$

|   |           |           |           |   |           |           |           |
|---|-----------|-----------|-----------|---|-----------|-----------|-----------|
| C | 0.209894  | 2.616378  | -0.723447 | H | 2.028433  | 3.612953  | -4.372030 |
| C | -1.162244 | 2.474488  | -0.864137 | H | 1.719448  | 5.292951  | -3.851963 |
| C | -2.029130 | 1.772109  | 0.023441  | H | 3.288307  | 4.857374  | -4.589304 |
| H | -1.584276 | 1.260107  | 0.882974  | C | 4.394185  | 4.669188  | -2.327076 |
| C | -3.384706 | 1.665810  | -0.109323 | H | 5.112853  | 4.299106  | -3.077126 |
| H | -3.921027 | 2.149566  | -0.929781 | H | 4.438741  | 5.773456  | -2.326426 |
| C | 0.969217  | 3.254509  | -1.770141 | H | 4.711944  | 4.311740  | -1.338310 |
| C | -4.173996 | 0.898761  | 0.849564  | H | -1.625045 | 2.917161  | -1.754190 |
| O | -3.752383 | 0.292361  | 1.822320  | C | 0.909747  | 2.124630  | 0.496607  |
| O | -5.496902 | 0.926779  | 0.540724  | C | 0.546530  | 2.565108  | 1.782138  |
| C | 2.292836  | 3.614357  | -1.661824 | C | 1.962435  | 1.193884  | 0.418149  |
| H | 2.817753  | 3.431431  | -0.720694 | C | 1.190031  | 2.108720  | 2.929331  |
| H | 0.423356  | 3.490848  | -2.686861 | H | -0.259054 | 3.296335  | 1.885171  |
| C | -6.364241 | 0.209485  | 1.414350  | C | 2.611612  | 0.715468  | 1.552730  |
| H | -6.107962 | -0.861837 | 1.438096  | H | 2.271635  | 0.821145  | -0.561667 |
| H | -6.304500 | 0.599500  | 2.443087  | C | 2.246145  | 1.162064  | 2.851352  |
| H | -7.380436 | 0.342667  | 1.021606  | H | 0.865852  | 2.498450  | 3.893310  |
| N | 3.053645  | 4.190878  | -2.619479 | H | 3.406894  | -0.017403 | 1.423112  |
| C | 2.492237  | 4.505529  | -3.920549 | N | 2.886080  | 0.699835  | 3.980063  |

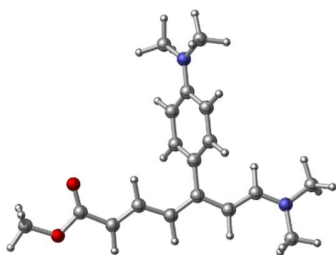

|                                              |                             |
|----------------------------------------------|-----------------------------|
| Zero-point correction=                       | 0.388869 (Hartree/Particle) |
| Thermal correction to Energy=                | 0.413028                    |
| Thermal correction to Enthalpy=              | 0.413972                    |
| Thermal correction to Gibbs Free Energy=     | 0.332185                    |
| Sum of electronic and zero-point Energies=   | -959.254878                 |
| Sum of electronic and thermal Energies=      | -959.230719                 |
| Sum of electronic and thermal Enthalpies=    | -959.229775                 |
| Sum of electronic and thermal Free Energies= | -959.311562                 |

### 3b-OH-Cl

E(scf) = 31.48 a.u.

$\nu_{\min} = -1286.46292721 \text{ cm}^{-1}$

|   |           |           |           |   |           |           |           |
|---|-----------|-----------|-----------|---|-----------|-----------|-----------|
| C | 1.011009  | 1.182557  | -0.015485 | H | -2.378610 | -2.077609 | -1.880585 |
| C | 1.801852  | 0.018226  | -0.452527 | H | -1.725310 | -1.263848 | -3.348487 |
| C | 1.320004  | -1.229685 | -0.324429 | H | -0.611320 | -2.077929 | -2.233695 |
| H | 1.887573  | -2.113578 | -0.619643 | C | -2.577593 | 0.645305  | -1.764960 |
| C | -0.043214 | -1.421031 | 0.283554  | H | -2.653432 | 0.879266  | -2.833624 |
| H | 0.070688  | -1.290423 | 1.381687  | H | -3.476605 | 0.123333  | -1.410110 |
| C | -0.311745 | 1.035248  | 0.237076  | H | -2.443855 | 1.582780  | -1.213916 |
| C | -0.583701 | -2.839644 | 0.167758  | H | 2.791753  | 0.196597  | -0.876582 |
| O | 0.071625  | -3.799671 | -0.160513 | C | 1.683238  | 2.499346  | 0.103733  |
| O | -1.870811 | -2.903027 | 0.527638  | C | 1.089035  | 3.649420  | -0.447311 |
| C | -0.995601 | -0.276155 | -0.088428 | C | 2.930427  | 2.619815  | 0.742971  |
| H | -1.932303 | -0.400101 | 0.469005  | C | 1.714006  | 4.893774  | -0.334735 |
| H | -0.916661 | 1.881250  | 0.567052  | H | 0.158293  | 3.545038  | -1.008147 |
| C | -2.483064 | -4.201855 | 0.514951  | C | 3.551940  | 3.865933  | 0.859539  |
| H | -2.457113 | -4.627796 | -0.499068 | H | 3.408468  | 1.732341  | 1.165923  |
| H | -1.957474 | -4.880905 | 1.201919  | C | 2.943697  | 5.007149  | 0.323983  |
| H | -3.518648 | -4.052129 | 0.840676  | H | 1.245595  | 5.777556  | -0.775550 |
| N | -1.381038 | -0.217117 | -1.570729 | H | 4.515111  | 3.946485  | 1.369897  |
| C | -1.541243 | -1.502646 | -2.293326 | H | 3.432875  | 5.980786  | 0.409793  |

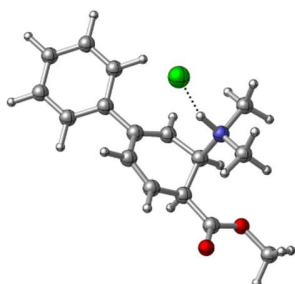

|                                              |                             |
|----------------------------------------------|-----------------------------|
| Zero-point correction=                       | 0.333022 (Hartree/Particle) |
| Thermal correction to Energy=                | 0.353024                    |
| Thermal correction to Enthalpy=              | 0.353968                    |
| Thermal correction to Gibbs Free Energy=     | 0.283172                    |
| Sum of electronic and zero-point Energies=   | -1286.129905                |
| Sum of electronic and thermal Energies=      | -1286.109903                |
| Sum of electronic and thermal Enthalpies=    | -1286.108959                |
| Sum of electronic and thermal Free Energies= | -1286.179755                |

#### 4a

E(scf) = -1286.47968161 a.u.

$\nu_{\min} = 15.31 \text{ cm}^{-1}$

|   |           |           |          |   |           |          |           |
|---|-----------|-----------|----------|---|-----------|----------|-----------|
| C | -1.256223 | 4.749386  | 2.080816 | C | -7.302272 | 4.126061 | 1.464088  |
| C | -0.744132 | 3.493826  | 2.464015 | H | -6.895158 | 3.190676 | 1.880717  |
| C | -1.603699 | 2.384756  | 2.398778 | H | -7.303877 | 4.876318 | 2.270439  |
| H | -1.257871 | 1.398102  | 2.711601 | H | -8.358872 | 3.933868 | 1.172331  |
| C | -2.928657 | 2.514566  | 1.948373 | C | -6.486292 | 3.693328 | -0.787727 |
| H | -1.080946 | 1.982612  | 0.261665 | H | -6.024802 | 2.728040 | -0.524001 |
| C | -2.575009 | 4.881507  | 1.641095 | H | -7.509234 | 3.484186 | -1.172736 |
| C | -3.753396 | 1.269644  | 1.887057 | H | -5.896989 | 4.130291 | -1.609215 |
| O | -3.339275 | 0.164065  | 2.166292 | H | -0.604488 | 5.625712 | 2.105012  |
| O | -5.012678 | 1.494302  | 1.480814 | C | 0.665456  | 3.338241 | 2.909122  |
| C | -3.421897 | 3.771985  | 1.565353 | C | 1.426300  | 2.224284 | 2.504967  |
| H | -4.446585 | 3.902135  | 1.205035 | C | 1.273552  | 4.301326 | 3.736175  |
| H | -2.949310 | 5.862399  | 1.337607 | C | 2.752203  | 2.077070 | 2.919902  |
| C | -5.867285 | 0.350168  | 1.379178 | H | 0.987110  | 1.485822 | 1.830757  |
| H | -5.459848 | -0.374782 | 0.658820 | C | 2.598951  | 4.151945 | 4.152275  |
| H | -5.973480 | -0.142301 | 2.357264 | H | 0.695923  | 5.164684 | 4.075121  |
| H | -6.837433 | 0.726403  | 1.034144 | C | 3.343367  | 3.038747 | 3.746632  |
| N | -6.459160 | 4.575437  | 0.367944 | H | 3.329055  | 1.210134 | 2.587836  |

H 3.050295 4.906008 4.802138 H 4.380291 2.922452 4.071641

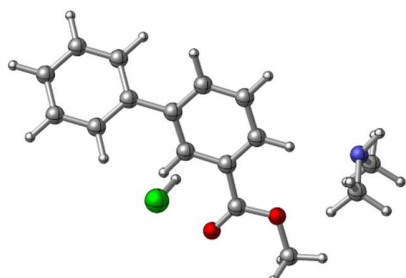

Zero-point correction= 0.326046 (Hartree/Particle)  
 Thermal correction to Energy= 0.349029  
 Thermal correction to Enthalpy= 0.349973  
 Thermal correction to Gibbs Free Energy= 0.268850  
 Sum of electronic and zero-point Energies= -1286.153636  
 Sum of electronic and thermal Energies= -1286.130653  
 Sum of electronic and thermal Enthalpies= -1286.129708  
 Sum of electronic and thermal Free Energies= -1286.210832

**4b**

E(scf) = -1286.48029470 a.u.

$\nu_{\min} = 18.56 \text{ cm}^{-1}$

|   |           |           |           |   |           |           |           |
|---|-----------|-----------|-----------|---|-----------|-----------|-----------|
| C | 1.132613  | 1.193749  | 0.259997  | C | -2.533643 | -1.726717 | -3.755208 |
| C | 1.591007  | 0.082162  | -0.473992 | H | -3.315999 | -2.460414 | -3.495312 |
| C | 0.774365  | -1.026882 | -0.677695 | H | -2.861372 | -1.215706 | -4.688166 |
| H | 1.132272  | -1.886432 | -1.247118 | H | -1.615248 | -2.292395 | -3.976999 |
| C | -0.527850 | -1.059288 | -0.158219 | C | -3.454203 | -0.049612 | -2.238126 |
| H | 1.036006  | -0.271263 | 2.322907  | H | -3.881016 | 0.581917  | -3.049213 |
| C | -0.178988 | 1.153584  | 0.776278  | H | -4.258802 | -0.716633 | -1.883777 |
| C | -1.362039 | -2.271851 | -0.407474 | H | -3.181281 | 0.610297  | -1.399743 |
| O | -0.974464 | -3.258192 | -0.998733 | H | 2.599757  | 0.092392  | -0.891794 |
| O | -2.579078 | -2.181493 | 0.153194  | C | 2.020369  | 2.353520  | 0.524889  |
| C | -0.998637 | 0.041451  | 0.573379  | C | 1.531367  | 3.672070  | 0.464314  |
| H | -2.005844 | 0.019626  | 0.989845  | C | 3.372525  | 2.152901  | 0.862946  |
| H | -0.550759 | 1.992924  | 1.368001  | C | 2.371582  | 4.757688  | 0.723955  |
| C | -3.471107 | -3.267585 | -0.093512 | H | 0.488327  | 3.848480  | 0.190581  |
| H | -3.670014 | -3.362507 | -1.171888 | C | 4.210894  | 3.238886  | 1.126046  |
| H | -3.049353 | -4.216084 | 0.272183  | H | 3.757985  | 1.134872  | 0.953560  |
| H | -4.398951 | -3.032314 | 0.441836  | C | 3.714576  | 4.545342  | 1.055046  |
| N | -2.306363 | -0.837172 | -2.634921 | H | 1.976622  | 5.774942  | 0.662229  |



H 5.255212 3.063244 1.396485 H 4.371079 5.394736 1.259731

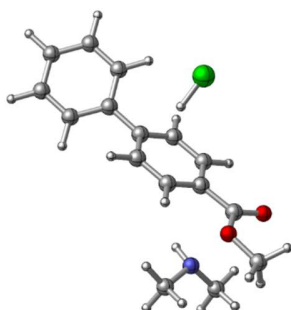

Zero-point correction= 0.325271 (Hartree/Particle)  
 Thermal correction to Energy= 0.348527  
 Thermal correction to Enthalpy= 0.349472  
 Thermal correction to Gibbs Free Energy= 0.267233  
 Sum of electronic and zero-point Energies= -1286.155024  
 Sum of electronic and thermal Energies= -1286.131767  
 Sum of electronic and thermal Enthalpies= -1286.130823  
 Sum of electronic and thermal Free Energies= -1286.213062

### TS-3a-CN-r

E(scf) = -917.896137009 a.u.

$\nu_{\min} = -347.98\text{cm}^{-1}$

|   |           |           |           |   |           |          |           |
|---|-----------|-----------|-----------|---|-----------|----------|-----------|
| C | -0.291692 | 3.292653  | -0.428516 | C | 2.987182  | 2.706835 | 2.269227  |
| C | -1.687240 | 3.422865  | 0.059912  | H | 3.598014  | 2.670730 | 3.177511  |
| C | -2.417743 | 2.232063  | 0.206587  | H | 3.177927  | 1.804401 | 1.670689  |
| H | -0.109374 | 3.337087  | -1.513321 | H | 3.261036  | 3.597540 | 1.688158  |
| H | -3.470400 | 2.317592  | 0.495666  | C | 1.262122  | 2.587408 | 4.072582  |
| C | -1.970409 | 0.928105  | 0.041933  | H | 1.645873  | 1.611232 | 4.404385  |
| H | -0.939698 | 0.697822  | -0.233937 | H | 1.753924  | 3.381056 | 4.654089  |
| C | 0.798603  | 3.085756  | 0.359571  | H | 0.178527  | 2.629945 | 4.232122  |
| C | -2.865148 | -0.184153 | 0.245305  | C | -2.212299 | 4.743529 | 0.298338  |
| O | -4.049550 | -0.141210 | 0.566569  | C | -3.550079 | 4.983348 | 0.743884  |
| O | -2.236741 | -1.385777 | 0.040842  | C | -1.405062 | 5.906756 | 0.099234  |
| C | 0.620905  | 2.947606  | 1.772851  | C | -4.030170 | 6.259713 | 0.971040  |
| H | -0.406206 | 2.985866  | 2.150042  | H | -4.222226 | 4.142266 | 0.918433  |
| H | 1.790626  | 2.991717  | -0.085006 | C | -1.882578 | 7.187114 | 0.325363  |
| C | -3.034937 | -2.547652 | 0.217874  | H | -0.373053 | 5.792251 | -0.239790 |
| H | -3.428438 | -2.615422 | 1.245675  | C | -3.208431 | 7.396720 | 0.768612  |
| H | -3.893587 | -2.557421 | -0.473632 | H | -5.058853 | 6.395359 | 1.313565  |
| H | -2.384377 | -3.408619 | 0.012876  | H | -1.227710 | 8.045854 | 0.159058  |
| N | 1.567700  | 2.766957  | 2.650259  | C | -3.703335 | 8.711732 | 1.005951  |

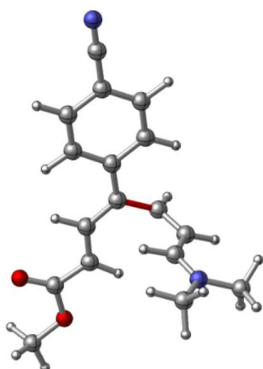

|                                              |                             |
|----------------------------------------------|-----------------------------|
| Zero-point correction=                       | 0.313888 (Hartree/Particle) |
| Thermal correction to Energy=                | 0.334971                    |
| Thermal correction to Enthalpy=              | 0.335915                    |
| Thermal correction to Gibbs Free Energy=     | 0.261130                    |
| Sum of electronic and zero-point Energies=   | -917.582249                 |
| Sum of electronic and thermal Energies=      | -917.561166                 |
| Sum of electronic and thermal Enthalpies=    | -917.560222                 |
| Sum of electronic and thermal Free Energies= | -917.635007                 |

**TS-3a-NMe<sub>2</sub>-r**

E(scf) = -959.586084050 a.u.

$\nu_{\min} = -704.70\text{cm}^{-1}$

|   |           |           |           |   |           |           |           |
|---|-----------|-----------|-----------|---|-----------|-----------|-----------|
| C | -0.236286 | 3.392531  | -0.395582 | H | -2.215536 | -3.353484 | 0.057720  |
| C | -1.643163 | 3.495060  | 0.063439  | N | 1.491244  | 2.538851  | 2.685597  |
| C | -2.350990 | 2.308058  | 0.188946  | C | 2.927284  | 2.541855  | 2.374894  |
| H | -0.016502 | 3.514199  | -1.468318 | H | 3.494466  | 2.462289  | 3.308854  |
| H | -3.409549 | 2.378004  | 0.463824  | H | 3.174910  | 1.685853  | 1.729775  |
| C | -1.877613 | 0.990478  | 0.042748  | H | 3.204355  | 3.474884  | 1.866835  |
| H | -0.838564 | 0.778278  | -0.215026 | C | 1.116478  | 2.164102  | 4.051132  |
| C | 0.826404  | 3.116841  | 0.410604  | H | 1.505205  | 1.158749  | 4.272147  |
| C | -2.748331 | -0.124080 | 0.239000  | H | 1.555537  | 2.879997  | 4.761646  |
| O | -3.945138 | -0.113105 | 0.539488  | H | 0.025041  | 2.164061  | 4.153749  |
| O | -2.093364 | -1.330164 | 0.060589  | C | -2.179808 | 4.836064  | 0.321391  |
| C | 0.584213  | 2.814545  | 1.787554  | C | -3.488161 | 5.068310  | 0.812540  |
| H | -0.460888 | 2.795890  | 2.111560  | C | -1.411754 | 6.001770  | 0.088438  |
| H | 1.835484  | 3.055676  | -0.001233 | C | -3.984333 | 6.346151  | 1.052697  |
| C | -2.878269 | -2.495534 | 0.239921  | H | -4.147325 | 4.222088  | 1.018610  |
| H | -3.290642 | -2.559939 | 1.261531  | C | -1.895091 | 7.288891  | 0.328745  |
| H | -3.727513 | -2.530794 | -0.463686 | H | -0.393802 | 5.907783  | -0.300837 |

|   |           |          |          |   |           |          |          |
|---|-----------|----------|----------|---|-----------|----------|----------|
| C | -3.198849 | 7.507109 | 0.832744 | H | -1.236341 | 8.130678 | 0.115329 |
| H | -5.004217 | 6.434388 | 1.427183 | N | -3.683629 | 8.785070 | 1.103247 |

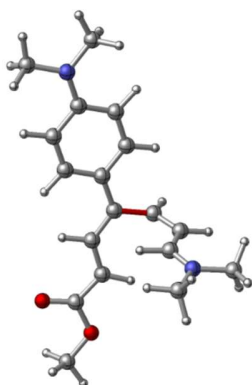

|                                              |                             |
|----------------------------------------------|-----------------------------|
| Zero-point correction=                       | 0.386698 (Hartree/Particle) |
| Thermal correction to Energy=                | 0.410541                    |
| Thermal correction to Enthalpy=              | 0.411485                    |
| Thermal correction to Gibbs Free Energy=     | 0.329982                    |
| Sum of electronic and zero-point Energies=   | -959.199386                 |
| Sum of electronic and thermal Energies=      | -959.175543                 |
| Sum of electronic and thermal Enthalpies=    | -959.174599                 |
| Sum of electronic and thermal Free Energies= | -959.256102                 |

### TS-3a-OH-Cl

E(scf) = -1286.43540909a.u.

$\nu_{\min} = -885.32\text{cm}^{-1}$

|   |           |          |           |   |           |           |           |
|---|-----------|----------|-----------|---|-----------|-----------|-----------|
| C | -1.450874 | 4.494621 | 1.026714  | H | -2.678819 | 5.322503  | -0.504939 |
| C | -1.194426 | 3.426580 | 1.984129  | C | -5.750828 | -0.134073 | 0.042769  |
| C | -2.034968 | 2.347064 | 1.942994  | H | -5.121557 | -0.953189 | -0.337693 |
| H | -1.885773 | 1.489523 | 2.601792  | H | -6.180901 | -0.437485 | 1.009087  |
| C | -3.107752 | 2.239525 | 0.967320  | H | -6.549721 | 0.091669  | -0.674200 |
| H | -2.432613 | 1.817224 | -0.160911 | N | -4.834652 | 4.222485  | 1.194707  |
| C | -2.549844 | 4.528121 | 0.235089  | C | -4.596274 | 4.216520  | 2.663345  |
| C | -3.953123 | 1.030600 | 1.052307  | H | -4.652535 | 3.183488  | 3.025245  |
| O | -3.728095 | 0.061885 | 1.751850  | H | -3.599700 | 4.625084  | 2.862705  |
| O | -4.984223 | 1.064420 | 0.176076  | H | -5.363372 | 4.827916  | 3.155955  |
| C | -3.634537 | 3.506021 | 0.361588  | C | -6.204083 | 3.751653  | 0.845363  |
| H | -4.126384 | 3.302072 | -0.597541 | H | -6.333183 | 2.728059  | 1.206945  |

|   |           |          |           |   |           |          |          |
|---|-----------|----------|-----------|---|-----------|----------|----------|
| H | -6.939667 | 4.418723 | 1.313691  | H | 0.361621  | 1.393950 | 2.961020 |
| H | -6.321247 | 3.769695 | -0.244793 | C | 1.434605  | 4.864612 | 4.329036 |
| H | -0.698775 | 5.279688 | 0.910357  | H | -0.157706 | 5.679534 | 3.131493 |
| C | -0.054042 | 3.521520 | 2.926878  | C | 2.107997  | 3.713687 | 4.750783 |
| C | 0.642398  | 2.372561 | 3.357030  | H | 2.228537  | 1.559307 | 4.570680 |
| C | 0.368198  | 4.769373 | 3.430306  | H | 1.736082  | 5.845341 | 4.706778 |
| C | 1.703774  | 2.466465 | 4.259165  | H | 2.942733  | 3.787117 | 5.452373 |

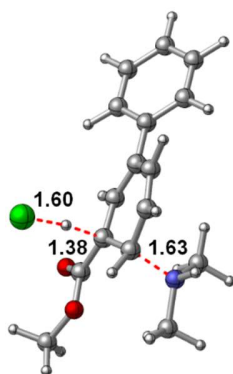

|                                              |                             |
|----------------------------------------------|-----------------------------|
| Zero-point correction=                       | 0.328032 (Hartree/Particle) |
| Thermal correction to Energy=                | 0.348040                    |
| Thermal correction to Enthalpy=              | 0.348984                    |
| Thermal correction to Gibbs Free Energy=     | 0.277889                    |
| Sum of electronic and zero-point Energies=   | -1286.107377                |
| Sum of electronic and thermal Energies=      | -1286.087369                |
| Sum of electronic and thermal Enthalpies=    | -1286.086425                |
| Sum of electronic and thermal Free Energies= | -1286.157520                |

### TS-3a-r-conf1

E(scf) = -825.700714105 a.u.

$\nu_{\min} = -691.73\text{cm}^{-1}$

|   |           |           |           |   |           |           |           |
|---|-----------|-----------|-----------|---|-----------|-----------|-----------|
| C | -0.218775 | 3.261164  | -0.197115 | O | -5.504354 | 0.339477  | -0.008659 |
| C | -1.663779 | 3.387888  | 0.119614  | C | 2.108962  | 2.864214  | 0.302364  |
| C | -2.380893 | 2.192648  | -0.002102 | H | 2.331374  | 2.968384  | -0.764678 |
| H | 0.110283  | 3.366681  | -1.246325 | H | 0.482146  | 2.897271  | 1.774569  |
| H | -1.759297 | 1.319569  | -0.247801 | C | -6.004812 | -0.974681 | -0.185217 |
| C | -3.733008 | 1.847412  | 0.101247  | H | -5.742480 | -1.382380 | -1.176154 |
| H | -4.529156 | 2.563573  | 0.291529  | H | -5.609957 | -1.668405 | 0.576535  |
| C | 0.752135  | 3.003103  | 0.721945  | H | -7.097990 | -0.910399 | -0.091683 |
| C | -4.134698 | 0.485267  | -0.098433 | N | 3.129001  | 2.617200  | 1.078571  |
| O | -3.423961 | -0.495901 | -0.323568 | C | 2.975531  | 2.455221  | 2.532591  |

|   |           |          |           |   |           |          |           |
|---|-----------|----------|-----------|---|-----------|----------|-----------|
| H | 2.532249  | 3.361015 | 2.968889  | C | -1.299865 | 5.861110 | 0.268602  |
| H | 2.331183  | 1.591654 | 2.749852  | C | -3.861704 | 6.290318 | 1.254903  |
| H | 3.961967  | 2.288210 | 2.977691  | H | -4.124807 | 4.168858 | 1.153220  |
| C | 4.485012  | 2.482474 | 0.539832  | C | -1.725355 | 7.154811 | 0.566199  |
| H | 5.135466  | 3.244140 | 0.994750  | H | -0.285144 | 5.724647 | -0.114906 |
| H | 4.877343  | 1.484797 | 0.786259  | C | -3.015286 | 7.389244 | 1.060351  |
| H | 4.471930  | 2.613042 | -0.548673 | H | -4.869046 | 6.443123 | 1.654213  |
| C | -2.144149 | 4.726427 | 0.442325  | H | -1.039477 | 7.992642 | 0.408046  |
| C | -3.443654 | 4.993085 | 0.956170  | H | -3.350367 | 8.403036 | 1.292990  |

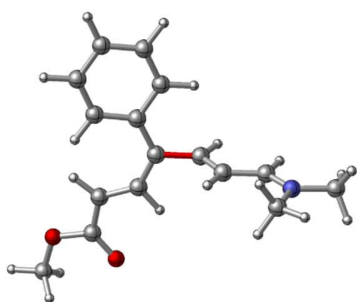

Zero-point correction= 0.315181 (Hartree/Particle)

Thermal correction to Energy= 0.334363

Thermal correction to Enthalpy= 0.335307

Thermal correction to Gibbs Free Energy= 0.265268

Sum of electronic and zero-point Energies= -825.385533

Sum of electronic and thermal Energies= -825.366352

Sum of electronic and thermal Enthalpies= -825.365407

Sum of electronic and thermal Free Energies= -825.435446

### TS-3a-r-conf2

E(scf) = -825.706538428a.u.

$\nu_{\min} = -736.33\text{cm}^{-1}$

|   |           |          |           |   |           |           |           |
|---|-----------|----------|-----------|---|-----------|-----------|-----------|
| C | -0.212193 | 3.156534 | -0.117305 | O | -2.229624 | -0.929883 | 2.156554  |
| C | -1.565908 | 3.520073 | 0.348265  | C | 2.173484  | 2.862275  | 0.089853  |
| C | -2.295548 | 2.515447 | 0.983486  | H | 2.184526  | 2.446284  | -0.922970 |
| H | -0.100725 | 2.717312 | -1.124626 | H | 0.860834  | 3.711365  | 1.629623  |
| H | -3.319567 | 2.757922 | 1.288787  | C | -3.049182 | -1.891990 | 2.798156  |
| C | -1.902583 | 1.207837 | 1.287428  | H | -3.367293 | -1.556236 | 3.799858  |
| H | -0.903484 | 0.835474 | 1.050500  | H | -3.960110 | -2.108108 | 2.214366  |
| C | 0.921368  | 3.287785 | 0.625237  | H | -2.447126 | -2.806827 | 2.891351  |
| C | -2.803418 | 0.307678 | 1.940415  | N | 3.326126  | 2.919301  | 0.699744  |
| O | -3.961523 | 0.522926 | 2.302747  | C | 3.455147  | 3.452203  | 2.064851  |

|   |           |          |           |   |           |          |           |
|---|-----------|----------|-----------|---|-----------|----------|-----------|
| H | 3.141465  | 4.505308 | 2.090022  | C | -1.263571 | 5.795289 | -0.665721 |
| H | 2.833605  | 2.868658 | 2.758192  | C | -3.810586 | 6.586253 | 0.119856  |
| H | 4.502602  | 3.381828 | 2.376336  | H | -4.023644 | 4.635341 | 0.975358  |
| C | 4.557291  | 2.453998 | 0.055749  | C | -1.723244 | 7.077821 | -0.970539 |
| H | 5.273962  | 3.286475 | -0.003363 | H | -0.256122 | 5.512569 | -0.982755 |
| H | 4.998894  | 1.644981 | 0.656248  | C | -3.001950 | 7.493287 | -0.582746 |
| H | 4.339137  | 2.085153 | -0.953346 | H | -4.814531 | 6.884951 | 0.436724  |
| C | -2.063356 | 4.856897 | 0.044095  | H | -1.069195 | 7.762004 | -1.519836 |
| C | -3.359465 | 5.304822 | 0.425470  | H | -3.361940 | 8.497453 | -0.819405 |

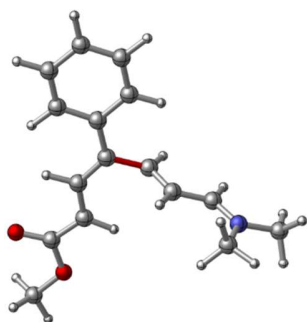

|                                              |                             |
|----------------------------------------------|-----------------------------|
| Zero-point correction=                       | 0.314826 (Hartree/Particle) |
| Thermal correction to Energy=                | 0.334121                    |
| Thermal correction to Enthalpy=              | 0.335065                    |
| Thermal correction to Gibbs Free Energy=     | 0.264539                    |
| Sum of electronic and zero-point Energies=   | -825.391712                 |
| Sum of electronic and thermal Energies=      | -825.372418                 |
| Sum of electronic and thermal Enthalpies=    | -825.371474                 |
| Sum of electronic and thermal Free Energies= | -825.442000                 |

### TS-3a-r-conf3

E(scf) = -825.702957391 a.u.

$\nu_{\min} = -685.20 \text{ cm}^{-1}$

|   |           |          |           |   |           |           |           |
|---|-----------|----------|-----------|---|-----------|-----------|-----------|
| C | -0.076305 | 3.719483 | -0.369196 | C | -3.643279 | 0.503490  | -0.205740 |
| C | -1.500912 | 3.654439 | 0.061342  | O | -2.844632 | -0.371015 | -0.544314 |
| C | -2.090254 | 2.394846 | -0.103198 | O | -4.976763 | 0.193707  | -0.037381 |
| H | 0.152242  | 3.904039 | -1.431472 | C | 0.801700  | 3.331417  | 1.841852  |
| H | -1.394669 | 1.617941 | -0.451533 | H | -0.235550 | 3.262793  | 2.185632  |
| C | -3.383325 | 1.889155 | 0.062629  | H | 2.015543  | 3.618268  | 0.037156  |
| H | -4.239649 | 2.493880 | 0.352069  | C | -5.338324 | -1.156153 | -0.276003 |
| C | 1.005279  | 3.562147 | 0.446265  | H | -5.115965 | -1.461357 | -1.312522 |

|   |           |           |           |   |           |          |           |
|---|-----------|-----------|-----------|---|-----------|----------|-----------|
| H | -4.803988 | -1.847285 | 0.397689  | C | -2.100345 | 4.898877 | 0.531630  |
| H | -6.419928 | -1.228782 | -0.095445 | C | -3.378971 | 4.970241 | 1.151608  |
| N | 1.735278  | 3.192663  | 2.741673  | C | -1.399454 | 6.133752 | 0.411119  |
| C | 3.164414  | 3.263343  | 2.401032  | C | -3.910188 | 6.180028 | 1.600219  |
| H | 3.423577  | 2.462272  | 1.694444  | H | -3.951527 | 4.060298 | 1.312937  |
| H | 3.397503  | 4.238404  | 1.951081  | C | -1.939370 | 7.339741 | 0.855399  |
| H | 3.755198  | 3.139996  | 3.314924  | H | -0.407172 | 6.147498 | -0.047011 |
| C | 1.405610  | 2.954187  | 4.149638  | C | -3.205113 | 7.381351 | 1.454570  |
| H | 1.852094  | 2.001625  | 4.471270  | H | -4.894531 | 6.180958 | 2.078320  |
| H | 1.819395  | 3.768008  | 4.763442  | H | -1.362243 | 8.261069 | 0.731320  |
| H | 0.317834  | 2.912940  | 4.278416  | H | -3.628874 | 8.326079 | 1.803927  |

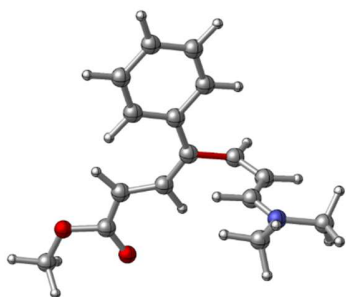

|                                              |                             |
|----------------------------------------------|-----------------------------|
| Zero-point correction=                       | 0.315119 (Hartree/Particle) |
| Thermal correction to Energy=                | 0.334312                    |
| Thermal correction to Enthalpy=              | 0.335256                    |
| Thermal correction to Gibbs Free Energy=     | 0.265154                    |
| Sum of electronic and zero-point Energies=   | -825.387838                 |
| Sum of electronic and thermal Energies=      | -825.368645                 |
| Sum of electronic and thermal Enthalpies=    | -825.367701                 |
| Sum of electronic and thermal Free Energies= | -825.437804                 |

#### TS-3a-r-conf4

E(scf) = -825.708282959 a.u.

$\nu_{\min} = -497.22\text{cm}^{-1}$

|   |           |          |           |   |           |           |           |
|---|-----------|----------|-----------|---|-----------|-----------|-----------|
| C | -0.308194 | 3.339176 | -0.434531 | C | 0.771511  | 3.089006  | 0.357050  |
| C | -1.700721 | 3.497695 | 0.050770  | C | -2.837022 | -0.147587 | 0.282920  |
| C | -2.448272 | 2.331371 | 0.213778  | O | -2.477814 | -1.321578 | 0.193783  |
| H | -0.115869 | 3.393325 | -1.517881 | O | -4.145795 | 0.150040  | 0.605433  |
| H | -3.499096 | 2.451150 | 0.492729  | C | 0.568478  | 2.892909  | 1.759045  |
| C | -2.010822 | 1.006793 | 0.086712  | H | -0.464921 | 2.931758  | 2.118213  |
| H | -0.974374 | 0.774790 | -0.167488 | H | 1.765937  | 2.981076  | -0.079498 |

|   |           |           |           |   |           |          |           |
|---|-----------|-----------|-----------|---|-----------|----------|-----------|
| C | -5.002168 | -0.957978 | 0.825144  | H | 0.076770  | 2.449298 | 4.188442  |
| H | -5.079215 | -1.597568 | -0.070145 | C | -2.198929 | 4.850929 | 0.274847  |
| H | -4.648165 | -1.588818 | 1.657920  | C | -3.511102 | 5.123025 | 0.753085  |
| H | -5.991312 | -0.546374 | 1.069712  | C | -1.379693 | 5.985410 | 0.021114  |
| N | 1.497504  | 2.652921  | 2.643371  | C | -3.960934 | 6.425399 | 0.956346  |
| C | 2.921155  | 2.585695  | 2.282961  | H | -4.189082 | 4.296921 | 0.976275  |
| H | 3.517864  | 2.515523  | 3.198853  | C | -1.835803 | 7.288169 | 0.229939  |
| H | 3.110502  | 1.698418  | 1.661289  | H | -0.360455 | 5.841032 | -0.347208 |
| H | 3.215967  | 3.488626  | 1.731904  | C | -3.132120 | 7.528212 | 0.699271  |
| C | 1.162590  | 2.399022  | 4.046993  | H | -4.978308 | 6.584074 | 1.326815  |
| H | 1.524362  | 1.399577  | 4.331353  | H | -1.166277 | 8.127730 | 0.019397  |
| H | 1.653774  | 3.150537  | 4.682686  | H | -3.490089 | 8.547598 | 0.862479  |

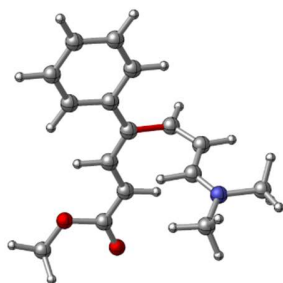

|                                              |                             |
|----------------------------------------------|-----------------------------|
| Zero-point correction=                       | 0.314631 (Hartree/Particle) |
| Thermal correction to Energy=                | 0.334012                    |
| Thermal correction to Enthalpy=              | 0.334956                    |
| Thermal correction to Gibbs Free Energy=     | 0.263534                    |
| Sum of electronic and zero-point Energies=   | -825.393652                 |
| Sum of electronic and thermal Energies=      | -825.374271                 |
| Sum of electronic and thermal Enthalpies=    | -825.373327                 |
| Sum of electronic and thermal Free Energies= | -825.444749                 |

### TS-3b-CN-r

E(scf) = -917.884245502 a.u.

$\nu_{\min} = -669.7\text{cm}^{-1}$

|   |           |          |          |   |           |           |          |
|---|-----------|----------|----------|---|-----------|-----------|----------|
| C | -1.494279 | 4.874621 | 0.938251 | C | -2.828391 | 5.217791  | 0.963948 |
| C | -1.038761 | 3.573569 | 0.391315 | C | -1.597395 | 0.961029  | 3.060380 |
| C | -1.075837 | 2.418041 | 1.135439 | O | -1.199657 | -0.114269 | 2.601466 |
| H | -0.693005 | 1.506665 | 0.659097 | O | -2.141327 | 1.003947  | 4.335451 |
| C | -1.588561 | 2.242915 | 2.440624 | C | -3.801130 | 4.261736  | 0.560343 |
| H | -1.992994 | 3.085998 | 3.005358 | H | -3.431194 | 3.282465  | 0.243411 |



|   |           |           |           |   |           |          |           |
|---|-----------|-----------|-----------|---|-----------|----------|-----------|
| H | -3.153946 | 6.169377  | 1.385555  | H | -5.440044 | 2.444411 | -0.023741 |
| C | -2.190575 | -0.228696 | 5.029845  | H | -0.656832 | 3.579602 | -0.633647 |
| H | -2.801573 | -0.977713 | 4.497076  | C | -0.483977 | 5.802940 | 1.496959  |
| H | -1.185495 | -0.662091 | 5.171360  | C | 0.715779  | 5.283742 | 2.029106  |
| H | -2.640583 | -0.020807 | 6.011272  | C | -0.669894 | 7.202750 | 1.496492  |
| N | -5.099084 | 4.441436  | 0.556641  | C | 1.679098  | 6.123299 | 2.575222  |
| C | -5.715588 | 5.714213  | 0.947836  | H | 0.868987  | 4.203895 | 2.020779  |
| H | -6.775565 | 5.698035  | 0.670312  | C | 0.300377  | 8.054383 | 2.014331  |
| H | -5.632012 | 5.857915  | 2.035847  | H | -1.569315 | 7.637430 | 1.057388  |
| H | -5.225759 | 6.550437  | 0.431321  | C | 1.480507  | 7.519416 | 2.565743  |
| C | -6.011527 | 3.349260  | 0.214233  | H | 2.592006  | 5.706586 | 3.004157  |
| H | -6.675881 | 3.146455  | 1.068059  | H | 0.151254  | 9.135282 | 1.991351  |
| H | -6.625142 | 3.637852  | -0.652286 | C | 2.480790  | 8.393916 | 3.106724  |

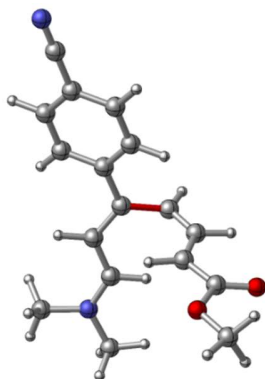

|                                              |                             |
|----------------------------------------------|-----------------------------|
| Zero-point correction=                       | 0.312797 (Hartree/Particle) |
| Thermal correction to Energy=                | 0.334049                    |
| Thermal correction to Enthalpy=              | 0.334993                    |
| Thermal correction to Gibbs Free Energy=     | 0.259484                    |
| Sum of electronic and zero-point Energies=   | -917.571449                 |
| Sum of electronic and thermal Energies=      | -917.550196                 |
| Sum of electronic and thermal Enthalpies=    | -917.549252                 |
| Sum of electronic and thermal Free Energies= | -917.624762                 |

### TS-3b-NMe<sub>2</sub>-r

E(scf) = -959.598007767 a.u.

$\nu_{\min} = -415.07 \text{ cm}^{-1}$

|   |           |          |          |   |           |          |          |
|---|-----------|----------|----------|---|-----------|----------|----------|
| C | -1.404495 | 4.861013 | 0.947500 | C | -1.300937 | 2.302805 | 2.632971 |
| C | -0.984037 | 3.519787 | 0.457288 | H | -1.656972 | 3.172682 | 3.190439 |
| C | -0.941238 | 2.412414 | 1.268824 | C | -2.763027 | 5.189881 | 0.980830 |
| H | -0.607748 | 1.474422 | 0.805624 | C | -1.220813 | 1.062114 | 3.316433 |

|   |           |           |          |   |           |          |           |
|---|-----------|-----------|----------|---|-----------|----------|-----------|
| O | -0.855250 | -0.038195 | 2.883566 | H | -6.609950 | 3.114634 | 1.247510  |
| O | -1.626784 | 1.169547  | 4.644719 | H | -6.600475 | 3.575066 | -0.480967 |
| C | -3.735181 | 4.228743  | 0.662051 | H | -5.395899 | 2.404083 | 0.141083  |
| H | -3.381528 | 3.231377  | 0.386079 | H | -0.712292 | 3.446485 | -0.600460 |
| H | -3.086433 | 6.178461  | 1.305392 | C | -0.389721 | 5.800588 | 1.395466  |
| C | -1.583364 | -0.023193 | 5.402029 | C | 0.982718  | 5.443964 | 1.344426  |
| H | -2.234742 | -0.807703 | 4.978397 | C | -0.679247 | 7.095884 | 1.904869  |
| H | -0.562910 | -0.440636 | 5.460577 | C | 1.988938  | 6.294086 | 1.762958  |
| H | -1.930904 | 0.230736  | 6.414314 | H | 1.239395  | 4.455038 | 0.960616  |
| N | -5.045623 | 4.408775  | 0.675727 | C | 0.310072  | 7.962294 | 2.325436  |
| C | -5.638518 | 5.699164  | 1.025527 | H | -1.712080 | 7.438732 | 1.982244  |
| H | -5.405517 | 5.962482  | 2.069233 | C | 1.689560  | 7.592800 | 2.270497  |
| H | -5.254573 | 6.491384  | 0.365393 | H | 3.020192  | 5.951385 | 1.696639  |
| H | -6.726988 | 5.640623  | 0.910586 | H | 0.016508  | 8.938811 | 2.706815  |
| C | -5.963190 | 3.312476  | 0.378048 | N | 2.670758  | 8.443433 | 2.684474  |

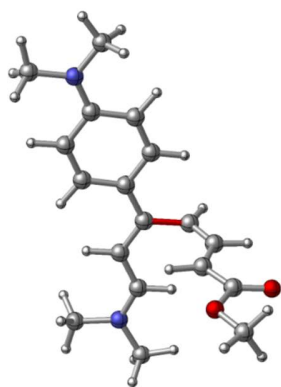

|                                              |                             |
|----------------------------------------------|-----------------------------|
| Zero-point correction=                       | 0.387196 (Hartree/Particle) |
| Thermal correction to Energy=                | 0.410895                    |
| Thermal correction to Enthalpy=              | 0.411840                    |
| Thermal correction to Gibbs Free Energy=     | 0.331357                    |
| Sum of electronic and zero-point Energies=   | -959.210812                 |
| Sum of electronic and thermal Energies=      | -959.187112                 |
| Sum of electronic and thermal Enthalpies=    | -959.186168                 |
| Sum of electronic and thermal Free Energies= | -959.266650                 |

### TS-3b-OH-Cl

E(scf) = -1286.43544267 a.u.

$\nu_{\min} = -915.45\text{cm}^{-1}$

|   |           |          |          |   |           |          |           |
|---|-----------|----------|----------|---|-----------|----------|-----------|
| C | -1.682883 | 4.294776 | 0.162714 | C | -1.016430 | 3.118641 | -0.385518 |
|---|-----------|----------|----------|---|-----------|----------|-----------|

|   |           |           |           |   |           |          |           |
|---|-----------|-----------|-----------|---|-----------|----------|-----------|
| C | -1.660245 | 1.918433  | -0.386379 | H | -5.157071 | 2.455062 | -3.261238 |
| H | -1.150353 | 1.000689  | -0.688467 | H | -4.101953 | 1.374152 | -2.303203 |
| C | -3.023724 | 1.813281  | 0.110296  | C | -5.205514 | 4.514875 | -1.618312 |
| H | -2.829201 | 1.811840  | 1.494099  | H | -5.404836 | 4.763251 | -2.668654 |
| C | -3.024254 | 4.249637  | 0.421118  | H | -6.144959 | 4.257868 | -1.111701 |
| C | -3.668286 | 0.488326  | 0.072600  | H | -4.736091 | 5.371098 | -1.121553 |
| O | -3.101615 | -0.563543 | -0.156552 | H | 0.016987  | 3.198685 | -0.726329 |
| O | -4.979766 | 0.544788  | 0.406933  | C | -0.880620 | 5.503241 | 0.487659  |
| C | -3.829557 | 3.064010  | -0.001479 | C | -1.409851 | 6.796428 | 0.310373  |
| H | -4.788519 | 2.982094  | 0.522311  | C | 0.428518  | 5.383381 | 0.993532  |
| H | -3.525693 | 5.076377  | 0.925835  | C | -0.661220 | 7.929773 | 0.636389  |
| C | -5.659763 | -0.705429 | 0.529111  | H | -2.411785 | 6.913541 | -0.108733 |
| H | -5.629911 | -1.264171 | -0.418894 | C | 1.176574  | 6.516703 | 1.322577  |
| H | -5.200077 | -1.322782 | 1.315919  | H | 0.855588  | 4.391010 | 1.154172  |
| H | -6.696835 | -0.466277 | 0.794744  | C | 0.635364  | 7.794680 | 1.145243  |
| N | -4.293440 | 3.343549  | -1.545116 | H | -1.089352 | 8.923910 | 0.484048  |
| C | -4.860857 | 2.161473  | -2.245703 | H | 2.186460  | 6.400246 | 1.724150  |
| H | -5.728826 | 1.799866  | -1.683806 | H | 1.222246  | 8.681093 | 1.398845  |

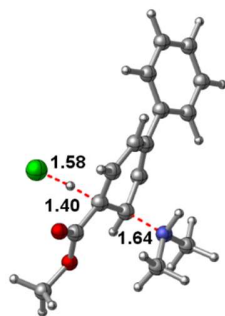

Zero-point correction= 0.327642 (Hartree/Particle)  
 Thermal correction to Energy= 0.347737  
 Thermal correction to Enthalpy= 0.348681  
 Thermal correction to Gibbs Free Energy= 0.277272  
 Sum of electronic and zero-point Energies= -1286.107801  
 Sum of electronic and thermal Energies= -1286.087706

Sum of electronic and thermal Enthalpies= -1286.086761  
 Sum of electronic and thermal Free Energies= -1286.158171

**TS-3b-r-conf1**

E(scf) = -825.704568836 a.u.

$\nu_{\min} = -996.86 \text{ cm}^{-1}$

|   |           |           |           |   |           |          |           |
|---|-----------|-----------|-----------|---|-----------|----------|-----------|
| C | 0.393082  | 2.657997  | -0.556041 | H | 3.237376  | 4.169979 | -3.230698 |
| C | -1.075527 | 2.829134  | -0.666143 | H | 3.179383  | 2.486837 | -3.845552 |
| C | -1.938498 | 1.817752  | -1.017553 | H | 3.169821  | 3.860682 | -4.988431 |
| H | -1.487882 | 0.841931  | -1.251539 | C | 0.678157  | 3.893596 | -5.230248 |
| C | -3.344957 | 1.844353  | -1.134517 | H | 0.987135  | 4.897802 | -5.558291 |
| H | -3.907956 | 2.757149  | -0.921063 | H | 0.954305  | 3.166480 | -6.009078 |
| C | 1.222700  | 2.907041  | -1.638629 | H | -0.408680 | 3.875248 | -5.086543 |
| C | -4.065382 | 0.690155  | -1.540426 | H | -1.455248 | 3.825869 | -0.406384 |
| O | -3.627449 | -0.428965 | -1.836229 | C | 0.976627  | 2.236112 | 0.738800  |
| O | -5.436492 | 0.920284  | -1.589560 | C | 0.133516  | 1.696468 | 1.735585  |
| C | 0.675499  | 3.281116  | -2.888285 | C | 2.356170  | 2.357400 | 1.033484  |
| H | -0.415081 | 3.338943  | -2.955891 | C | 0.647909  | 1.269593 | 2.960164  |
| H | 2.301888  | 2.784942  | -1.552690 | H | -0.932840 | 1.609686 | 1.525291  |
| C | -6.234271 | -0.178326 | -1.984144 | C | 2.865392  | 1.947426 | 2.263105  |
| H | -5.987488 | -0.525029 | -3.003031 | H | 3.040635  | 2.799037 | 0.307835  |
| H | -6.116275 | -1.041134 | -1.305635 | C | 2.014410  | 1.395257 | 3.230394  |
| H | -7.279253 | 0.163926  | -1.959986 | H | -0.022434 | 0.842816 | 3.710050  |
| N | 1.355451  | 3.553947  | -3.978404 | H | 3.931492  | 2.061991 | 2.473284  |
| C | 2.821484  | 3.514394  | -4.009009 | H | 2.417023  | 1.071827 | 4.193580  |

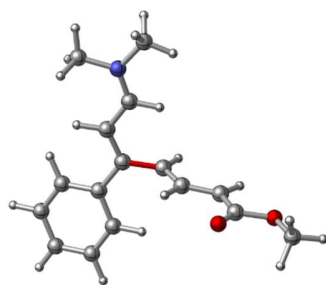

Zero-point correction= 0.314559 (Hartree/Particle)

Thermal correction to Energy= 0.333814

Thermal correction to Enthalpy= 0.334758

Thermal correction to Gibbs Free Energy= 0.264384

Sum of electronic and zero-point Energies= -825.390010  
 Sum of electronic and thermal Energies= -825.370755  
 Sum of electronic and thermal Enthalpies= -825.369811  
 Sum of electronic and thermal Free Energies= -825.440185

**TS-3b-r-conf2**

E(scf) = -825.706538428 a.u.

$\nu_{\min} = -736.33 \text{ cm}^{-1}$

|   |           |           |           |   |           |          |           |
|---|-----------|-----------|-----------|---|-----------|----------|-----------|
| C | -0.212193 | 3.156534  | -0.117305 | C | 3.455147  | 3.452203 | 2.064851  |
| C | -1.565908 | 3.520073  | 0.348265  | H | 3.141465  | 4.505308 | 2.090022  |
| C | -2.295548 | 2.515447  | 0.983486  | H | 2.833605  | 2.868658 | 2.758192  |
| H | -0.100725 | 2.717312  | -1.124626 | H | 4.502602  | 3.381828 | 2.376336  |
| H | -3.319567 | 2.757922  | 1.288787  | C | 4.557291  | 2.453998 | 0.055749  |
| C | -1.902583 | 1.207837  | 1.287428  | H | 5.273962  | 3.286475 | -0.003363 |
| H | -0.903484 | 0.835474  | 1.050500  | H | 4.998894  | 1.644981 | 0.656248  |
| C | 0.921368  | 3.287785  | 0.625237  | H | 4.339137  | 2.085153 | -0.953346 |
| C | -2.803418 | 0.307678  | 1.940415  | C | -2.063356 | 4.856897 | 0.044095  |
| O | -3.961523 | 0.522926  | 2.302747  | C | -3.359465 | 5.304822 | 0.425470  |
| O | -2.229624 | -0.929883 | 2.156554  | C | -1.263571 | 5.795289 | -0.665721 |
| C | 2.173484  | 2.862275  | 0.089853  | C | -3.810586 | 6.586253 | 0.119856  |
| H | 2.184526  | 2.446284  | -0.922970 | H | -4.023644 | 4.635341 | 0.975358  |
| H | 0.860834  | 3.711365  | 1.629623  | C | -1.723244 | 7.077821 | -0.970539 |
| C | -3.049182 | -1.891990 | 2.798156  | H | -0.256122 | 5.512569 | -0.982755 |
| H | -3.367293 | -1.556236 | 3.799858  | C | -3.001950 | 7.493287 | -0.582746 |
| H | -3.960110 | -2.108108 | 2.214366  | H | -4.814531 | 6.884951 | 0.436724  |
| H | -2.447126 | -2.806827 | 2.891351  | H | -1.069195 | 7.762004 | -1.519836 |
| N | 3.326126  | 2.919301  | 0.699744  | H | -3.361940 | 8.497453 | -0.819405 |

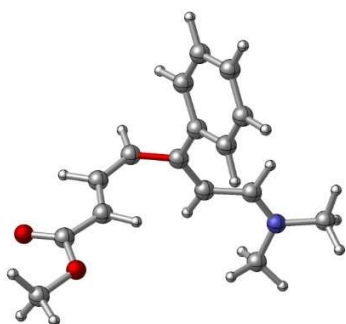

Zero-point correction= 0.314826 (Hartree/Particle)  
 Thermal correction to Energy= 0.334121  
 Thermal correction to Enthalpy= 0.335065

Thermal correction to Gibbs Free Energy= 0.264539  
 Sum of electronic and zero-point Energies= -825.391712  
 Sum of electronic and thermal Energies= -825.372418  
 Sum of electronic and thermal Enthalpies= -825.371474  
 Sum of electronic and thermal Free Energies= -825.442000

**TS-3b-r-conf3**

E(scf) = -825.696465517 a.u.

$\nu_{\min} = -1251.88\text{cm}^{-1}$

|   |           |           |           |   |           |          |           |
|---|-----------|-----------|-----------|---|-----------|----------|-----------|
| C | 0.337279  | 2.999965  | 0.070093  | H | 1.080722  | 2.778858 | -3.905328 |
| C | -1.104091 | 3.149053  | 0.375464  | H | 1.168032  | 4.569299 | -3.952486 |
| C | -2.016556 | 2.140739  | 0.178494  | H | 2.376839  | 3.587779 | -4.831698 |
| H | -1.628184 | 1.193702  | -0.224475 | C | 4.056649  | 3.888756 | -2.989395 |
| C | -3.409541 | 2.136318  | 0.411694  | H | 4.463889  | 3.119666 | -3.662597 |
| H | -3.914159 | 3.020136  | 0.811762  | H | 4.175938  | 4.874513 | -3.464289 |
| C | 0.798910  | 3.307081  | -1.196309 | H | 4.607005  | 3.874191 | -2.041148 |
| C | -4.191962 | 0.987590  | 0.127396  | H | -1.411234 | 4.118909 | 0.789237  |
| O | -3.826453 | -0.104384 | -0.327807 | C | 1.235389  | 2.510338 | 1.140004  |
| O | -5.538618 | 1.184941  | 0.422189  | C | 1.052104  | 2.960358 | 2.466268  |
| C | 2.170569  | 3.436387  | -1.539468 | C | 2.241909  | 1.552589 | 0.888215  |
| H | 2.920171  | 3.425879  | -0.743673 | C | 1.886511  | 2.515238 | 3.488499  |
| H | 0.044956  | 3.549499  | -1.946969 | H | 0.253302  | 3.672910 | 2.679278  |
| C | -6.392396 | 0.086730  | 0.171751  | C | 3.057225  | 1.084604 | 1.922706  |
| H | -6.376026 | -0.218127 | -0.889318 | H | 2.348904  | 1.131426 | -0.113599 |
| H | -6.116619 | -0.798412 | 0.771636  | C | 2.891119  | 1.573412 | 3.221125  |
| H | -7.409176 | 0.406787  | 0.443183  | H | 1.748023  | 2.892801 | 4.504473  |
| N | 2.636064  | 3.630073  | -2.751001 | H | 3.816109  | 0.326902 | 1.713283  |
| C | 1.759788  | 3.641452  | -3.927717 | H | 3.529922  | 1.209883 | 4.029781  |

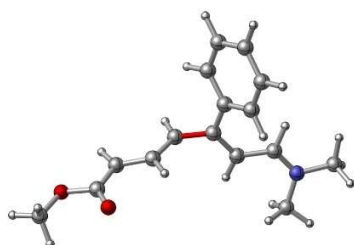

|                                              |                             |
|----------------------------------------------|-----------------------------|
| Zero-point correction=                       | 0.314281 (Hartree/Particle) |
| Thermal correction to Energy=                | 0.333610                    |
| Thermal correction to Enthalpy=              | 0.334554                    |
| Thermal correction to Gibbs Free Energy=     | 0.264018                    |
| Sum of electronic and zero-point Energies=   | -825.382185                 |
| Sum of electronic and thermal Energies=      | -825.362855                 |
| Sum of electronic and thermal Enthalpies=    | -825.361911                 |
| Sum of electronic and thermal Free Energies= | -825.432448                 |

**TS-3b-r-conf4**

E(scf) = -825.706768383 a.u.

$\nu_{\min} = -596.15 \text{ cm}^{-1}$

|   |           |           |          |   |           |          |           |
|---|-----------|-----------|----------|---|-----------|----------|-----------|
| C | -1.380630 | 4.882008  | 0.933473 | H | -5.197073 | 6.496009 | 0.593556  |
| C | -0.950422 | 3.581567  | 0.360638 | H | -6.691377 | 5.610085 | 1.005907  |
| C | -0.884295 | 2.429183  | 1.108258 | H | -5.420163 | 5.829978 | 2.243304  |
| H | -0.535131 | 1.530191  | 0.587498 | C | -5.914384 | 3.292670 | 0.441164  |
| C | -1.252805 | 2.258102  | 2.463635 | H | -6.527487 | 3.066022 | 1.326932  |
| H | -1.622976 | 3.107828  | 3.043742 | H | -6.580557 | 3.579472 | -0.386637 |
| C | -2.723216 | 5.200684  | 1.026512 | H | -5.343622 | 2.400020 | 0.158828  |
| C | -1.194763 | 1.032034  | 3.181162 | H | -0.693827 | 3.579098 | -0.703003 |
| O | -1.515388 | 0.844376  | 4.359372 | C | -0.354379 | 5.824515 | 1.429244  |
| O | -0.724396 | -0.037922 | 2.427050 | C | 0.939384  | 5.344604 | 1.729820  |
| C | -3.699099 | 4.233920  | 0.679819 | C | -0.611551 | 7.203391 | 1.608361  |
| H | -3.334331 | 3.259072  | 0.343517 | C | 1.924662  | 6.199768 | 2.221548  |
| H | -3.044826 | 6.150194  | 1.454295 | H | 1.147486  | 4.283990 | 1.582286  |
| C | -0.657454 | -1.283794 | 3.093106 | C | 0.382533  | 8.061468 | 2.076244  |
| H | 0.010640  | -1.247361 | 3.970833 | H | -1.587364 | 7.619934 | 1.352516  |
| H | -1.648624 | -1.617574 | 3.446253 | C | 1.652430  | 7.562469 | 2.392649  |
| H | -0.265841 | -2.009941 | 2.365966 | H | 2.913424  | 5.803967 | 2.465911  |
| N | -5.001062 | 4.394218  | 0.745079 | H | 0.168209  | 9.126722 | 2.191628  |
| C | -5.609389 | 5.658062  | 1.172669 | H | 2.429119  | 8.235990 | 2.763491  |

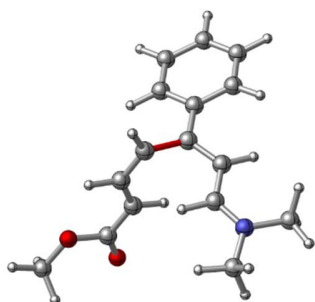

Zero-point correction= 0.314328 (Hartree/Particle)  
 Thermal correction to Energy= 0.333698  
 Thermal correction to Enthalpy= 0.334642  
 Thermal correction to Gibbs Free Energy= 0.263809  
 Sum of electronic and zero-point Energies= -825.392440  
 Sum of electronic and thermal Energies= -825.373071  
 Sum of electronic and thermal Enthalpies= -825.372127  
 Sum of electronic and thermal Free Energies= -825.442959

### 3a-OH

E(scf) = -1286.45284976 a.u.

$\nu_{\min} = 15.90 \text{ cm}^{-1}$

|   |           |           |           |   |           |          |           |
|---|-----------|-----------|-----------|---|-----------|----------|-----------|
| C | -0.143938 | 2.242736  | 0.406707  | C | 3.308691  | 4.522460 | 1.639671  |
| C | -1.494442 | 2.600841  | 0.391816  | H | 2.864487  | 5.199459 | 0.891874  |
| C | -2.419022 | 1.612506  | -0.032599 | H | 2.705834  | 4.579600 | 2.560993  |
| H | 0.082032  | 1.223241  | 0.069500  | H | 4.325636  | 4.865954 | 1.863554  |
| H | -1.982564 | 0.642556  | -0.294295 | C | 4.662873  | 2.511692 | 1.056053  |
| C | -3.789079 | 1.744556  | -0.161554 | H | 5.334775  | 3.079902 | 0.391981  |
| H | -4.299142 | 2.679460  | 0.073453  | H | 5.128172  | 2.454870 | 2.053969  |
| C | 0.948858  | 3.030563  | 0.816861  | H | 4.555680  | 1.493709 | 0.660020  |
| C | -4.633313 | 0.693766  | -0.606576 | C | -1.948072 | 3.963638 | 0.800193  |
| O | -4.320899 | -0.498049 | -0.947952 | C | -2.809328 | 4.136486 | 1.899095  |
| O | -5.919929 | 1.004922  | -0.670555 | C | -1.527465 | 5.105641 | 0.094478  |
| C | 2.240162  | 2.520977  | 0.772515  | C | -3.235868 | 5.411647 | 2.281867  |
| H | 2.387969  | 1.499326  | 0.407209  | H | -3.142959 | 3.259384 | 2.459098  |
| H | 0.767689  | 4.045059  | 1.174556  | C | -1.951590 | 6.381761 | 0.476986  |
| C | -6.852395 | 0.008700  | -1.113137 | H | -0.863380 | 4.986772 | -0.765306 |
| H | -6.614468 | -0.318146 | -2.135929 | C | -2.807972 | 6.539141 | 1.572246  |
| H | -6.834842 | -0.863680 | -0.443728 | H | -3.902977 | 5.525226 | 3.140402  |
| H | -7.836165 | 0.491089  | -1.085679 | H | -1.615300 | 7.256497 | -0.085894 |
| N | 3.358835  | 3.155816  | 1.135666  | H | -3.141094 | 7.536291 | 1.871194  |



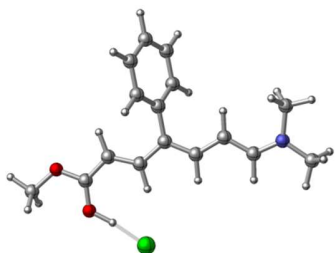

|                                              |                             |
|----------------------------------------------|-----------------------------|
| Zero-point correction=                       | 0.326410 (Hartree/Particle) |
| Thermal correction to Energy=                | 0.348189                    |
| Thermal correction to Enthalpy=              | 0.349133                    |
| Thermal correction to Gibbs Free Energy=     | 0.271823                    |
| Sum of electronic and zero-point Energies=   | -1286.126440                |
| Sum of electronic and thermal Energies=      | -1286.104661                |
| Sum of electronic and thermal Enthalpies=    | -1286.103717                |
| Sum of electronic and thermal Free Energies= | -1286.181027                |

### 3a-OH-aii

E(scf) = -1286.43850809 a.u.

$\nu_{\min} = 14.97 \text{ cm}^{-1}$

|   |           |           |          |   |           |           |           |
|---|-----------|-----------|----------|---|-----------|-----------|-----------|
| C | -0.161400 | 4.153602  | 0.523372 | N | 2.110959  | 1.762012  | 2.310653  |
| C | -1.530733 | 3.972769  | 0.703432 | C | 3.380857  | 1.881090  | 1.611805  |
| C | -2.210624 | 2.730197  | 1.014316 | H | 4.081324  | 1.128480  | 1.994585  |
| H | 0.099994  | 5.085922  | 0.007947 | H | 3.245486  | 1.717188  | 0.530736  |
| H | -3.256799 | 2.847744  | 1.312820 | H | 3.825654  | 2.881394  | 1.756035  |
| C | -1.787720 | 1.437116  | 0.902868 | C | 2.071780  | 0.929523  | 3.503640  |
| H | -0.776913 | 1.172483  | 0.594579 | H | 2.374150  | -0.103328 | 3.265018  |
| C | 0.989281  | 3.392289  | 0.889719 | H | 2.754081  | 1.318329  | 4.279297  |
| C | -2.673068 | 0.320000  | 1.181034 | H | 1.053360  | 0.909637  | 3.913019  |
| O | -3.863847 | 0.366575  | 1.507624 | C | -2.413780 | 5.154085  | 0.467627  |
| O | -2.047485 | -0.861930 | 1.057174 | C | -3.689565 | 5.016357  | -0.121268 |
| C | 1.041359  | 2.475050  | 1.921088 | C | -1.999713 | 6.456504  | 0.822743  |
| H | 0.142999  | 2.299454  | 2.517249 | C | -4.506384 | 6.126368  | -0.348489 |
| H | 1.917362  | 3.664795  | 0.381612 | H | -4.054125 | 4.029436  | -0.411316 |
| C | -2.827300 | -2.038365 | 1.286677 | C | -2.810952 | 7.568633  | 0.583368  |
| H | -3.215363 | -2.056145 | 2.316534 | H | -1.036926 | 6.596661  | 1.320133  |
| H | -3.678456 | -2.086008 | 0.590397 | C | -4.071238 | 7.410775  | -0.003439 |
| H | -2.153522 | -2.887661 | 1.120954 | H | -5.489412 | 5.984005  | -0.805565 |

|   |           |          |          |   |           |          |           |
|---|-----------|----------|----------|---|-----------|----------|-----------|
| H | -2.462302 | 8.563394 | 0.874053 | H | -4.710592 | 8.278866 | -0.183101 |
|---|-----------|----------|----------|---|-----------|----------|-----------|

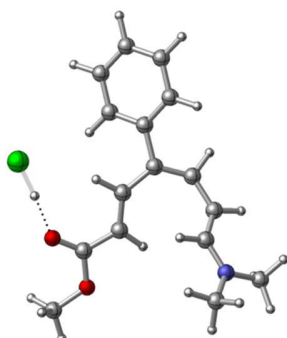

|                                              |                             |
|----------------------------------------------|-----------------------------|
| Zero-point correction=                       | 0.325664 (Hartree/Particle) |
| Thermal correction to Energy=                | 0.347798                    |
| Thermal correction to Enthalpy=              | 0.348743                    |
| Thermal correction to Gibbs Free Energy=     | 0.270368                    |
| Sum of electronic and zero-point Energies=   | -1286.112844                |
| Sum of electronic and thermal Energies=      | -1286.090710                |
| Sum of electronic and thermal Enthalpies=    | -1286.089765                |
| Sum of electronic and thermal Free Energies= | -1286.168140                |

### 3a-OH-int

E(scf) = -1286.44398626 a.u.

$\nu_{\min} = 15.89 \text{ cm}^{-1}$

|   |           |           |           |   |           |           |           |
|---|-----------|-----------|-----------|---|-----------|-----------|-----------|
| C | -0.193651 | 2.033997  | 0.572156  | H | -4.688564 | -1.873835 | -3.120105 |
| C | -1.396229 | 2.577373  | 0.140360  | H | -4.068700 | -3.315461 | -2.234776 |
| C | -2.407442 | 1.752232  | -0.471608 | N | 1.845592  | 4.234701  | 2.831948  |
| H | -0.026673 | 0.992182  | 0.277033  | C | 3.134917  | 3.564710  | 2.903093  |
| H | -3.286009 | 2.297318  | -0.828263 | H | 3.045066  | 2.576874  | 3.387250  |
| C | -2.437336 | 0.395975  | -0.656694 | H | 3.554472  | 3.416551  | 1.894688  |
| H | -1.621714 | -0.262043 | -0.351782 | H | 3.833941  | 4.177108  | 3.485801  |
| C | 0.878193  | 2.564612  | 1.348220  | C | 1.657483  | 5.428543  | 3.643026  |
| C | -3.570199 | -0.246978 | -1.287342 | H | 1.754493  | 5.195295  | 4.717278  |
| O | -4.655050 | 0.275832  | -1.581664 | H | 2.409257  | 6.193202  | 3.387051  |
| O | -3.352676 | -1.547000 | -1.543455 | H | 0.658880  | 5.848324  | 3.464669  |
| C | 0.844605  | 3.732386  | 2.091821  | C | -1.729477 | 4.029910  | 0.264647  |
| H | -0.072699 | 4.322218  | 2.119860  | C | -2.905176 | 4.450403  | 0.911872  |
| H | 1.773368  | 1.941111  | 1.397647  | C | -0.893179 | 5.011745  | -0.302575 |
| C | -4.426944 | -2.283885 | -2.132703 | C | -3.222533 | 5.810192  | 1.011218  |
| H | -5.321610 | -2.252966 | -1.492228 | H | -3.583519 | 3.703326  | 1.330583  |

|   |           |          |           |   |           |          |           |
|---|-----------|----------|-----------|---|-----------|----------|-----------|
| C | -1.207008 | 6.367828 | -0.202249 | H | -4.140749 | 6.114745 | 1.520510  |
| H | 0.018913  | 4.699143 | -0.817031 | H | -0.543959 | 7.112945 | -0.650078 |
| C | -2.372646 | 6.774235 | 0.461414  | H | -2.619232 | 7.836170 | 0.540264  |

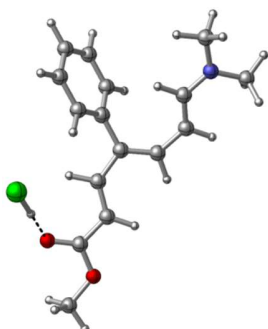

|                                              |                             |
|----------------------------------------------|-----------------------------|
| Zero-point correction=                       | 0.325593 (Hartree/Particle) |
| Thermal correction to Energy=                | 0.347742                    |
| Thermal correction to Enthalpy=              | 0.348686                    |
| Thermal correction to Gibbs Free Energy=     | 0.270400                    |
| Sum of electronic and zero-point Energies=   | -1286.118393                |
| Sum of electronic and thermal Energies=      | -1286.096244                |
| Sum of electronic and thermal Enthalpies=    | -1286.095300                |
| Sum of electronic and thermal Free Energies= | -1286.173586                |

### 3a-OH-p1

E(scf) = -1286.44788814a.u.

$\nu_{\min} = 31.09 \text{ cm}^{-1}$

|   |           |           |           |   |           |           |           |
|---|-----------|-----------|-----------|---|-----------|-----------|-----------|
| C | -1.414723 | 4.544623  | 0.920456  | H | -5.343047 | -1.082934 | 0.300550  |
| C | -1.123515 | 3.402600  | 1.807424  | H | -6.511466 | 0.241537  | 0.601250  |
| C | -1.914268 | 2.306102  | 1.728245  | H | -6.132126 | -0.248620 | -1.091735 |
| H | -1.790733 | 1.475006  | 2.422677  | N | -4.710370 | 4.071159  | 1.239919  |
| C | -2.971750 | 2.212244  | 0.670262  | C | -4.379939 | 4.220369  | 2.646048  |
| H | -2.479655 | 1.951828  | -0.286393 | H | -4.286993 | 3.253637  | 3.181825  |
| C | -2.572276 | 4.644312  | 0.240126  | H | -3.429954 | 4.759348  | 2.765359  |
| C | -3.994697 | 1.131904  | 0.917300  | H | -5.166766 | 4.807108  | 3.147799  |
| O | -4.227048 | 0.585639  | 1.984141  | C | -6.048124 | 3.550423  | 1.018641  |
| O | -4.671008 | 0.836803  | -0.188754 | H | -6.225907 | 2.558031  | 1.485446  |
| C | -3.663750 | 3.599577  | 0.352603  | H | -6.793280 | 4.240705  | 1.448919  |
| H | -4.130430 | 3.476135  | -0.635314 | H | -6.251810 | 3.459978  | -0.058601 |
| H | -2.802198 | 5.534915  | -0.350772 | H | -0.673732 | 5.345256  | 0.849557  |
| C | -5.729804 | -0.126790 | -0.079805 | C | -0.025746 | 3.508629  | 2.801910  |

|   |          |          |          |   |           |          |          |
|---|----------|----------|----------|---|-----------|----------|----------|
| C | 0.714512 | 2.375194 | 3.194350 | H | -0.272280 | 5.639767 | 3.126233 |
| C | 0.291989 | 4.744924 | 3.398790 | C | 2.021654  | 3.705795 | 4.744187 |
| C | 1.722766 | 2.471506 | 4.155354 | H | 2.286037  | 1.578663 | 4.439132 |
| H | 0.509338 | 1.410917 | 2.724030 | H | 1.523036  | 5.810702 | 4.815654 |
| C | 1.301633 | 4.841813 | 4.360501 | H | 2.813705  | 3.781803 | 5.493393 |

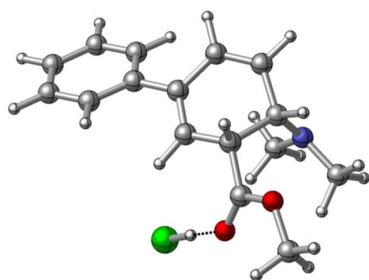

|                                              |                             |
|----------------------------------------------|-----------------------------|
| Zero-point correction=                       | 0.328495 (Hartree/Particle) |
| Thermal correction to Energy=                | 0.348947                    |
| Thermal correction to Enthalpy=              | 0.349891                    |
| Thermal correction to Gibbs Free Energy=     | 0.278219                    |
| Sum of electronic and zero-point Energies=   | -1286.119393                |
| Sum of electronic and thermal Energies=      | -1286.098941                |
| Sum of electronic and thermal Enthalpies=    | -1286.097997                |
| Sum of electronic and thermal Free Energies= | -1286.169669                |

### 3b-OH

E(scf) = -1286.45285742 a.u.

$\nu_{\min} = 16.79 \text{ cm}^{-1}$

|   |           |           |           |   |           |           |           |
|---|-----------|-----------|-----------|---|-----------|-----------|-----------|
| C | -0.043420 | 1.823157  | 0.275282  | C | -5.451282 | -1.337960 | -1.492057 |
| C | -1.392970 | 2.145945  | 0.285908  | H | -6.152053 | -1.584759 | -0.680049 |
| C | -2.448312 | 1.296747  | -0.143282 | H | -6.019204 | -0.896051 | -2.324863 |
| H | -2.183753 | 0.309058  | -0.531538 | H | -4.927515 | -2.241058 | -1.827935 |
| C | -3.778796 | 1.627508  | -0.113270 | N | 3.247730  | 3.392059  | 1.143625  |
| H | -4.113071 | 2.595438  | 0.266118  | C | 2.924441  | 4.779561  | 1.433385  |
| C | 0.937890  | 2.792727  | 0.662935  | H | 2.423466  | 5.254910  | 0.573437  |
| C | -4.835782 | 0.751223  | -0.566383 | H | 2.255086  | 4.860228  | 2.307472  |
| O | -6.044101 | 1.036546  | -0.543270 | H | 3.846531  | 5.333526  | 1.648650  |
| O | -4.437149 | -0.440168 | -1.034205 | C | 4.631432  | 2.971638  | 1.298055  |
| C | 2.285199  | 2.520329  | 0.790197  | H | 5.295166  | 3.562545  | 0.644713  |
| H | 2.643146  | 1.506190  | 0.594972  | H | 4.970418  | 3.101784  | 2.340298  |
| H | 0.566294  | 3.793806  | 0.893182  | H | 4.733524  | 1.911806  | 1.029934  |

|   |           |           |           |   |           |           |           |
|---|-----------|-----------|-----------|---|-----------|-----------|-----------|
| H | -6.450156 | 2.422086  | 0.003588  | C | 1.570553  | -1.000012 | -1.704923 |
| C |           |           |           | H | 1.421548  | 1.147157  | -1.918356 |
| I | -6.762470 | 3.660422  | 0.496131  | C | 0.488583  | -1.947377 | 0.240626  |
| H | -1.669802 | 3.147488  | 0.634256  | H | -0.513339 | -0.540175 | 1.543509  |
| C | 0.402426  | 0.457016  | -0.140708 | C | 1.237102  | -2.115917 | -0.929040 |
| C | 1.160472  | 0.276928  | -1.311394 | H | 2.151559  | -1.123941 | -2.622389 |
| C | 0.072366  | -0.670801 | 0.630536  |   |           |           |           |

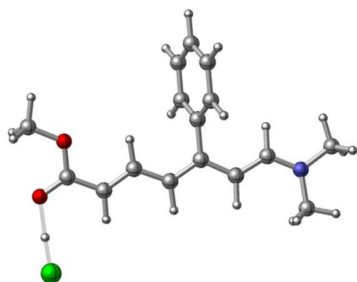

Zero-point correction= 0.325404 (Hartree/Particle)

Thermal correction to Energy= 0.347567

Thermal correction to Enthalpy= 0.348511

Thermal correction to Gibbs Free Energy= 0.269734

Sum of electronic and zero-point Energies= -1286.127453

Sum of electronic and thermal Energies= -1286.105290

Sum of electronic and thermal Enthalpies= -1286.104346

Sum of electronic and thermal Free Energies= -1286.183123

### 3b-OH-aii

E(scf) = -1286.44319050 a.u.

$\nu_{\min} = 29.09 \text{ cm}^{-1}$

|   |           |           |          |   |           |           |          |
|---|-----------|-----------|----------|---|-----------|-----------|----------|
| C | -0.827698 | 4.921687  | 1.445837 | H | -3.705901 | -0.943243 | 3.828275 |
| C | -0.173604 | 3.672910  | 1.294216 | H | -2.175518 | -1.477541 | 4.590507 |
| C | -0.566874 | 2.421346  | 1.793076 | H | -3.416570 | -0.628371 | 5.579223 |
| H | -0.077190 | 1.560543  | 1.326249 | N | -4.392072 | 3.935510  | 1.499688 |
| C | -1.411243 | 2.128594  | 2.873408 | C | -5.058396 | 4.933455  | 2.328932 |
| H | -1.787845 | 2.916929  | 3.526634 | H | -4.482745 | 5.111233  | 3.249527 |
| C | -2.228524 | 5.038975  | 1.621708 | H | -5.161711 | 5.889615  | 1.788954 |
| C | -1.821334 | 0.825508  | 3.154186 | H | -6.058356 | 4.573249  | 2.599440 |
| O | -1.725516 | -0.184614 | 2.341113 | C | -5.216141 | 2.884633  | 0.905089 |
| O | -2.375522 | 0.591972  | 4.339519 | H | -5.801740 | 2.385232  | 1.692356 |
| C | -3.096946 | 4.019426  | 1.222969 | H | -5.917683 | 3.315105  | 0.170869 |
| H | -2.706427 | 3.190125  | 0.622161 | H | -4.570399 | 2.143285  | 0.413315 |
| H | -2.630581 | 5.970978  | 2.022271 | H | 0.755556  | 3.679506  | 0.716144 |
| C | -2.950412 | -0.696715 | 4.589158 | C | -0.015729 | 6.162006  | 1.362012 |

|   |           |          |          |   |           |          |          |
|---|-----------|----------|----------|---|-----------|----------|----------|
| C | 1.318901  | 6.177540 | 1.817125 | H | -1.575533 | 7.355804 | 0.444803 |
| C | -0.553487 | 7.352144 | 0.829556 | C | 1.538020  | 8.513740 | 1.213870 |
| C | 2.086774  | 7.341075 | 1.745593 | H | 3.116172  | 7.335081 | 2.112408 |
| H | 1.745954  | 5.271983 | 2.253450 | H | -0.215913 | 9.423815 | 0.328974 |
| C | 0.215531  | 8.514547 | 0.754896 | H | 2.139479  | 9.424457 | 1.156421 |

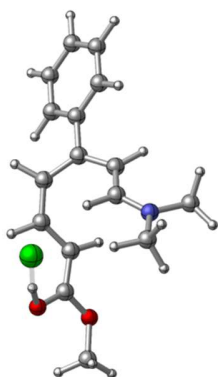

Zero-point correction= 0.328361 (Hartree/Particle)

Thermal correction to Energy= 0.349587

Thermal correction to Enthalpy= 0.350532

Thermal correction to Gibbs Free Energy= 0.276487

Sum of electronic and zero-point Energies= -1286.114830

Sum of electronic and thermal Energies= -1286.093603

Sum of electronic and thermal Enthalpies= -1286.092659

Sum of electronic and thermal Free Energies= -1286.166703

### 3b-OH-int

E(scf) = -1286.43931515 a.u.

$\nu_{\min} = 12.76 \text{ cm}^{-1}$

|   |           |           |          |   |           |           |           |
|---|-----------|-----------|----------|---|-----------|-----------|-----------|
| C | -2.216660 | 4.271121  | 1.244500 | H | -2.965816 | 6.113473  | 0.426335  |
| C | -2.251703 | 2.872135  | 1.300643 | C | 1.276414  | 0.668334  | 5.845691  |
| C | -1.532383 | 1.977136  | 2.131183 | H | 0.561701  | -0.043376 | 6.284511  |
| H | -1.700352 | 0.922282  | 1.889194 | H | 2.021455  | 0.111181  | 5.258901  |
| C | -0.700574 | 2.224301  | 3.209929 | H | 1.768684  | 1.248524  | 6.634807  |
| H | -0.499247 | 3.231204  | 3.570762 | N | -5.373818 | 5.268295  | -0.498530 |
| C | -3.204959 | 5.060330  | 0.580519 | C | -5.135754 | 6.642152  | -0.920057 |
| C | -0.076747 | 1.194479  | 3.964399 | H | -5.077405 | 7.320272  | -0.051504 |
| O | -0.085495 | -0.064408 | 3.768485 | H | -4.191780 | 6.715659  | -1.482236 |
| O | 0.597816  | 1.627133  | 5.024443 | H | -5.957023 | 6.972080  | -1.567883 |
| C | -4.442508 | 4.583097  | 0.174627 | C | -6.695868 | 4.709287  | -0.747352 |
| H | -4.729129 | 3.558032  | 0.425785 | H | -7.469487 | 5.284433  | -0.211086 |

|   |           |          |           |   |           |          |          |
|---|-----------|----------|-----------|---|-----------|----------|----------|
| H | -6.927667 | 4.736945 | -1.824187 | H | 0.432463  | 3.968983 | 0.741604 |
| H | -6.733907 | 3.667285 | -0.404688 | C | -0.267730 | 6.805769 | 3.306383 |
| H | -2.962137 | 2.376628 | 0.633700  | H | -2.356784 | 6.300398 | 3.056820 |
| C | -1.086813 | 5.042974 | 1.839800  | C | 1.047541  | 6.522643 | 2.924213 |
| C | 0.239419  | 4.770424 | 1.458072  | H | 2.321981  | 5.288107 | 1.682213 |
| C | -1.329233 | 6.078615 | 2.758584  | H | -0.469767 | 7.597169 | 4.032578 |
| C | 1.297127  | 5.507306 | 1.992154  | H | 1.877166  | 7.094010 | 3.348129 |

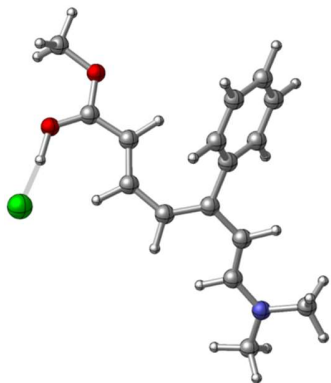

|                                              |                             |
|----------------------------------------------|-----------------------------|
| Zero-point correction=                       | 0.325259 (Hartree/Particle) |
| Thermal correction to Energy=                | 0.347171                    |
| Thermal correction to Enthalpy=              | 0.348115                    |
| Thermal correction to Gibbs Free Energy=     | 0.270258                    |
| Sum of electronic and zero-point Energies=   | -1286.114056                |
| Sum of electronic and thermal Energies=      | -1286.092144                |
| Sum of electronic and thermal Enthalpies=    | -1286.091200                |
| Sum of electronic and thermal Free Energies= | -1286.169057                |

### 3b-OH-p1

E(scf) = -1286.44664323 a.u.

$\nu_{\min} = 30.13 \text{ cm}^{-1}$

|   |           |           |           |   |           |           |           |
|---|-----------|-----------|-----------|---|-----------|-----------|-----------|
| C | -1.659998 | 4.335996  | 0.261976  | O | -4.982844 | 0.521511  | 0.873653  |
| C | -1.053188 | 3.063834  | -0.172852 | C | -3.925813 | 3.228877  | 0.173240  |
| C | -1.747422 | 1.912521  | -0.165593 | H | -4.724235 | 3.240232  | 0.929042  |
| H | -1.314820 | 0.990482  | -0.556799 | H | -3.488844 | 5.339251  | 0.711391  |
| C | -3.126963 | 1.888007  | 0.424779  | C | -5.892436 | -0.553209 | 0.592427  |
| H | -3.022233 | 1.855467  | 1.525773  | H | -6.366615 | -0.403993 | -0.389110 |
| C | -3.002168 | 4.398528  | 0.443195  | H | -5.362762 | -1.516503 | 0.593071  |
| C | -3.947258 | 0.678540  | 0.054565  | H | -6.645637 | -0.526767 | 1.387856  |
| O | -3.742275 | -0.077431 | -0.881857 | N | -4.584315 | 3.411558  | -1.108101 |

|   |           |          |           |   |           |          |           |
|---|-----------|----------|-----------|---|-----------|----------|-----------|
| C | -3.761386 | 3.336267 | -2.301698 | C | -1.221687 | 6.818749 | 0.105894  |
| H | -3.444268 | 2.303632 | -2.553971 | C | 0.519170  | 5.379365 | 0.962528  |
| H | -4.324757 | 3.733121 | -3.162098 | C | -0.396864 | 7.929681 | 0.295690  |
| H | -2.853495 | 3.943755 | -2.183509 | H | -2.213820 | 6.952851 | -0.331130 |
| C | -5.892647 | 2.803385 | -1.273593 | C | 1.344539  | 6.490871 | 1.154636  |
| H | -5.855880 | 1.729191 | -1.555149 | H | 0.884290  | 4.387032 | 1.238156  |
| H | -6.476719 | 2.890452 | -0.345465 | C | 0.890202  | 7.771446 | 0.822724  |
| H | -6.446832 | 3.321614 | -2.074422 | H | -0.757305 | 8.924201 | 0.020054  |
| H | -0.030174 | 3.083682 | -0.556064 | H | 2.347314  | 6.354995 | 1.567999  |
| C | -0.781994 | 5.523546 | 0.442864  | H | 1.536846  | 8.640514 | 0.967764  |

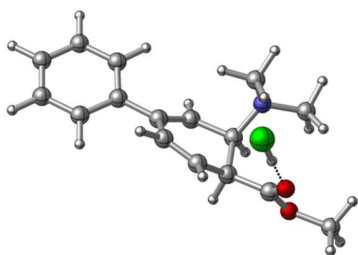

|                                              |                             |
|----------------------------------------------|-----------------------------|
| Zero-point correction=                       | 0.328410 (Hartree/Particle) |
| Thermal correction to Energy=                | 0.348892                    |
| Thermal correction to Enthalpy=              | 0.349836                    |
| Thermal correction to Gibbs Free Energy=     | 0.278044                    |
| Sum of electronic and zero-point Energies=   | -1286.118234                |
| Sum of electronic and thermal Energies=      | -1286.097751                |
| Sum of electronic and thermal Enthalpies=    | -1286.096807                |
| Sum of electronic and thermal Free Energies= | -1286.168599                |

### TS-3a-OH-r

E(scf) = -1286.41596930 a.u.

$\nu_{\min} = -127.07 \text{ cm}^{-1}$

|   |           |           |           |   |           |           |           |
|---|-----------|-----------|-----------|---|-----------|-----------|-----------|
| C | -0.347149 | 3.054713  | -0.412744 | H | -3.599301 | -2.807476 | 1.201933  |
| C | -1.715600 | 3.236899  | 0.133040  | H | -4.055910 | -2.648894 | -0.520079 |
| C | -2.488720 | 2.118916  | 0.332977  | H | -2.562222 | -3.544985 | -0.069204 |
| H | -0.236763 | 2.977835  | -1.503954 | N | 1.689090  | 2.988959  | 2.609753  |
| H | -3.498130 | 2.270040  | 0.726463  | C | 3.107823  | 2.909681  | 2.251161  |
| C | -2.100834 | 0.768936  | 0.093997  | H | 3.504462  | 1.934848  | 2.571836  |
| H | -1.094431 | 0.528688  | -0.254239 | H | 3.256534  | 3.031440  | 1.175106  |
| C | 0.792874  | 2.957164  | 0.322844  | H | 3.648810  | 3.704884  | 2.783130  |
| C | -2.925799 | -0.325220 | 0.283679  | C | 1.425602  | 3.021375  | 4.052862  |
| O | -4.177191 | -0.360228 | 0.662092  | H | 1.865330  | 2.127273  | 4.518637  |
| O | -2.381143 | -1.534461 | 0.067388  | H | 1.895726  | 3.916077  | 4.486681  |
| C | 0.708558  | 3.015949  | 1.751322  | H | 0.346098  | 3.041783  | 4.240171  |
| H | -0.298944 | 3.083357  | 2.175477  | C | -2.187099 | 4.616724  | 0.377408  |
| H | 1.753743  | 2.825318  | -0.175595 | C | -3.560994 | 4.904097  | 0.581476  |
| C | -3.206872 | -2.692503 | 0.179697  | C | -1.288168 | 5.709052  | 0.407321  |



|   |           |          |          |   |           |          |          |
|---|-----------|----------|----------|---|-----------|----------|----------|
| C | -3.992657 | 6.205564 | 0.830606 | C | -3.084981 | 7.274073 | 0.869823 |
| H | -4.304176 | 4.103597 | 0.536186 | H | -5.059283 | 6.390037 | 0.987739 |
| C | -1.730372 | 7.013445 | 0.650282 | H | -1.003838 | 7.830727 | 0.667701 |
| H | -0.221696 | 5.543202 | 0.243834 | H | -3.432510 | 8.292487 | 1.060598 |

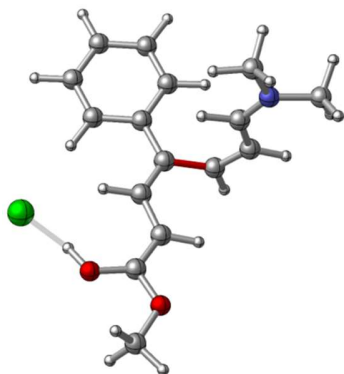

|                                              |                             |
|----------------------------------------------|-----------------------------|
| Zero-point correction=                       | 0.327698 (Hartree/Particle) |
| Thermal correction to Energy=                | 0.348937                    |
| Thermal correction to Enthalpy=              | 0.349881                    |
| Thermal correction to Gibbs Free Energy=     | 0.274255                    |
| Sum of electronic and zero-point Energies=   | -1286.088272                |
| Sum of electronic and thermal Energies=      | -1286.067032                |
| Sum of electronic and thermal Enthalpies=    | -1286.066088                |
| Sum of electronic and thermal Free Energies= | -1286.141714                |

### TS-3a-OH-uu

E(scf) = -1286.42107884 a.u.

$\nu_{\min} = -278.11 \text{ cm}^{-1}$

|   |           |           |           |   |           |           |           |
|---|-----------|-----------|-----------|---|-----------|-----------|-----------|
| C | -1.407851 | 4.304596  | 0.825019  | H | -6.400790 | 0.075452  | 0.155430  |
| C | -1.140352 | 3.216241  | 1.777606  | H | -5.842509 | -0.455813 | -1.474377 |
| C | -1.932800 | 2.104397  | 1.763304  | N | -4.650645 | 4.102066  | 1.564220  |
| H | -1.883995 | 1.395179  | 2.592888  | C | -4.178782 | 4.761263  | 2.780991  |
| C | -2.888188 | 1.874351  | 0.692405  | H | -4.072169 | 4.009838  | 3.580130  |
| H | -2.528546 | 2.036049  | -0.327875 | H | -3.216251 | 5.250774  | 2.602532  |
| C | -2.616883 | 4.568881  | 0.285579  | H | -4.917588 | 5.518517  | 3.086034  |
| C | -3.912615 | 0.905018  | 0.755093  | C | -5.968886 | 3.488028  | 1.689749  |
| O | -4.441069 | 0.552660  | -0.411802 | H | -5.940975 | 2.733852  | 2.493210  |
| C | -3.857052 | 3.779872  | 0.539210  | H | -6.716019 | 4.254610  | 1.947638  |
| H | -4.388034 | 3.416363  | -0.344745 | H | -6.258730 | 3.011535  | 0.744393  |
| H | -2.760153 | 5.458929  | -0.336868 | H | -0.589231 | 4.993676  | 0.597246  |
| C | -5.562538 | -0.342972 | -0.420758 | C | -0.080862 | 3.407652  | 2.795434  |
| H | -5.283357 | -1.316985 | 0.006274  | C | 0.611718  | 2.307769  | 3.344856  |

|   |           |          |          |   |           |          |          |
|---|-----------|----------|----------|---|-----------|----------|----------|
| C | 0.255506  | 4.695317 | 3.263927 | C | 1.900816  | 3.770984 | 4.787996 |
| C | 1.583176  | 2.486259 | 4.331424 | H | 2.105891  | 1.616225 | 4.737618 |
| H | 0.398953  | 1.301674 | 2.976611 | H | 1.467717  | 5.882989 | 4.596522 |
| C | 1.232759  | 4.874284 | 4.246580 | H | 2.666090  | 3.910668 | 5.555591 |
| H | -0.270878 | 5.569430 | 2.873179 | O | -4.424569 | 0.367114 | 1.801174 |

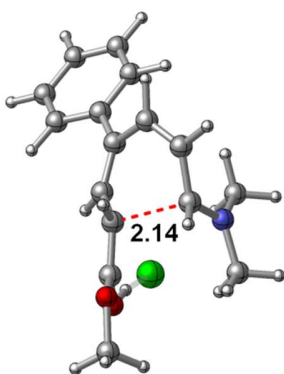

|                                              |                             |
|----------------------------------------------|-----------------------------|
| Zero-point correction=                       | 0.327169 (Hartree/Particle) |
| Thermal correction to Energy=                | 0.347299                    |
| Thermal correction to Enthalpy=              | 0.348243                    |
| Thermal correction to Gibbs Free Energy=     | 0.277666                    |
| Sum of electronic and zero-point Energies=   | -1286.093910                |
| Sum of electronic and thermal Energies=      | -1286.073780                |
| Sum of electronic and thermal Enthalpies=    | -1286.072836                |
| Sum of electronic and thermal Free Energies= | -1286.143413                |

### TS-3b-OH-dd

E(scf) = -1286.41917396 a.u.

$\nu_{\min} = -282.80 \text{ cm}^{-1}$

|   |           |           |           |   |           |           |           |
|---|-----------|-----------|-----------|---|-----------|-----------|-----------|
| C | -1.752619 | 4.273347  | 0.078809  | C | -5.738720 | -0.566431 | 1.391029  |
| C | -1.152643 | 3.008123  | -0.370749 | H | -6.367915 | -0.450739 | 0.496156  |
| C | -1.782687 | 1.815148  | -0.258512 | H | -5.267908 | -1.560001 | 1.372986  |
| H | -1.374370 | 0.936069  | -0.763593 | H | -6.342144 | -0.448706 | 2.298470  |
| C | -3.018957 | 1.694485  | 0.507376  | N | -4.535126 | 3.289232  | -1.482198 |
| H | -3.026503 | 2.174554  | 1.490233  | C | -3.743862 | 3.693159  | -2.642683 |
| C | -3.102683 | 4.425459  | 0.146097  | H | -3.303579 | 2.797314  | -3.109405 |
| C | -3.885292 | 0.586650  | 0.442235  | H | -4.404851 | 4.194932  | -3.366549 |
| O | -3.984057 | -0.285634 | -0.496527 | H | -2.950582 | 4.384792  | -2.341473 |
| O | -4.743328 | 0.464926  | 1.451182  | C | -5.678804 | 2.440505  | -1.801578 |
| C | -4.112356 | 3.394147  | -0.219620 | H | -5.320986 | 1.527755  | -2.305319 |
| H | -4.883722 | 3.190940  | 0.528032  | H | -6.218507 | 2.169712  | -0.884898 |
| H | -3.537962 | 5.385052  | 0.442722  | H | -6.365184 | 2.974830  | -2.476829 |

|   |           |          |           |   |           |          |          |
|---|-----------|----------|-----------|---|-----------|----------|----------|
| H | -0.183480 | 3.066683 | -0.872476 | C | 1.266511  | 6.219631 | 1.314167 |
| C | -0.842211 | 5.409560 | 0.389993  | H | 0.697273  | 4.139827 | 1.230679 |
| C | -1.191568 | 6.741792 | 0.095451  | C | 0.901498  | 7.538605 | 1.024743 |
| C | 0.406181  | 5.166028 | 0.994198  | H | -0.617560 | 8.820532 | 0.166527 |
| C | -0.330171 | 7.794693 | 0.410962  | H | 2.226428  | 6.008614 | 1.792337 |
| H | -2.137538 | 6.953814 | -0.407984 | H | 1.576274  | 8.362875 | 1.269020 |

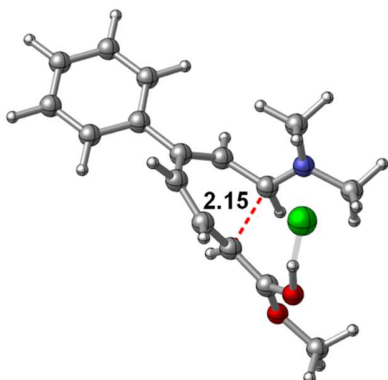

|                                              |                             |
|----------------------------------------------|-----------------------------|
| Zero-point correction=                       | 0.327239 (Hartree/Particle) |
| Thermal correction to Energy=                | 0.347407                    |
| Thermal correction to Enthalpy=              | 0.348352                    |
| Thermal correction to Gibbs Free Energy=     | 0.277637                    |
| Sum of electronic and zero-point Energies=   | -1286.091935                |
| Sum of electronic and thermal Energies=      | -1286.071767                |
| Sum of electronic and thermal Enthalpies=    | -1286.070822                |
| Sum of electronic and thermal Free Energies= | -1286.141537                |

### TS-3b-OH-r

E(scf) = -1286.42747508 a.u.

$\nu_{\min} = -44.10\text{cm}^{-1}$

|   |           |          |          |   |           |           |          |
|---|-----------|----------|----------|---|-----------|-----------|----------|
| C | -1.240707 | 4.832446 | 1.005103 | H | -3.124387 | 2.966760  | 0.568642 |
| C | -0.717817 | 3.534045 | 0.506742 | H | -3.005069 | 6.026253  | 1.254998 |
| C | -0.590299 | 2.435978 | 1.290215 | C | -1.585836 | 0.048852  | 5.384748 |
| H | -0.370594 | 1.491362 | 0.784523 | H | -2.617558 | -0.164380 | 5.062351 |
| C | -0.801511 | 2.374530 | 2.712043 | H | -0.970628 | -0.846951 | 5.208565 |
| H | -0.779967 | 3.284079 | 3.315849 | H | -1.575398 | 0.298950  | 6.453497 |
| C | -2.603376 | 5.047881 | 0.991208 | N | -4.815472 | 4.111351  | 0.653879 |
| C | -1.055821 | 1.196777 | 3.365152 | C | -5.490120 | 5.404500  | 0.802662 |
| O | -1.303154 | 0.030362 | 2.794341 | H | -5.444540 | 5.741334  | 1.849831 |
| O | -1.054018 | 1.188093 | 4.710595 | H | -5.020346 | 6.159841  | 0.158418 |
| C | -3.510954 | 3.985773 | 0.712439 | H | -6.540459 | 5.293752  | 0.510401 |

|   |           |          |           |   |           |          |          |
|---|-----------|----------|-----------|---|-----------|----------|----------|
| C | -5.675282 | 2.936178 | 0.479976  | C | 2.011267  | 6.629073 | 1.704012 |
| H | -6.395623 | 2.893916 | 1.311544  | H | 1.424795  | 4.800283 | 0.715944 |
| H | -6.234403 | 3.028471 | -0.464011 | C | 0.209498  | 7.938076 | 2.657360 |
| H | -5.061878 | 2.023749 | 0.473178  | H | -1.770377 | 7.146975 | 2.444329 |
| H | -0.594891 | 3.444663 | -0.577158 | C | 1.576621  | 7.759840 | 2.402981 |
| C | -0.295990 | 5.851636 | 1.494933  | H | 3.075502  | 6.481894 | 1.505728 |
| C | 1.086461  | 5.684325 | 1.258938  | H | -0.133648 | 8.812338 | 3.215535 |
| C | -0.715224 | 6.997928 | 2.210602  | H | 2.299749  | 8.499338 | 2.755748 |

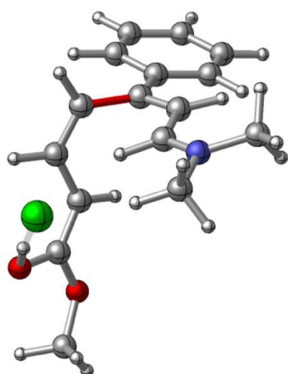

Zero-point correction= 0.328407 (Hartree/Particle)  
 Thermal correction to Energy= 0.349179  
 Thermal correction to Enthalpy= 0.350123  
 Thermal correction to Gibbs Free Energy= 0.277134  
 Sum of electronic and zero-point Energies= -1286.099068  
 Sum of electronic and thermal Energies= -1286.078296  
 Sum of electronic and thermal Enthalpies= -1286.077352  
 Sum of electronic and thermal Free Energies= -1286.150341

### 3a-NH

E(scf) = -1286.44749053 a.u.

$\nu_{\min} = 18.3 \text{ cm}^{-1}$

|   |           |           |           |   |           |           |           |
|---|-----------|-----------|-----------|---|-----------|-----------|-----------|
| C | -0.188786 | 2.158861  | 0.407572  | C | 2.206852  | 2.504743  | 0.731128  |
| C | -1.513973 | 2.519762  | 0.424530  | H | 2.393302  | 1.490922  | 0.361894  |
| C | -2.502574 | 1.542062  | 0.018421  | H | 0.725627  | 3.968210  | 1.192989  |
| H | 0.044329  | 1.143383  | 0.065258  | C | -6.954069 | 0.030274  | -0.985906 |
| H | -2.122319 | 0.548020  | -0.244567 | H | -6.727951 | -0.330724 | -2.001502 |
| C | -3.843302 | 1.723370  | -0.084418 | H | -6.949626 | -0.832898 | -0.301936 |
| H | -4.321384 | 2.676499  | 0.146765  | H | -7.936069 | 0.519071  | -0.969436 |
| C | 0.928313  | 2.966001  | 0.812530  | N | 3.363630  | 3.212690  | 1.021834  |
| C | -4.714742 | 0.623710  | -0.522329 | C | 3.228058  | 4.520825  | 1.661396  |
| O | -4.361669 | -0.505330 | -0.812532 | H | 2.592914  | 5.174358  | 1.047210  |
| O | -6.007553 | 1.015189  | -0.571318 | H | 2.785599  | 4.436448  | 2.670060  |

|   |           |          |          |    |           |          |           |
|---|-----------|----------|----------|----|-----------|----------|-----------|
| H | 4.219809  | 4.984602 | 1.741197 | H  | -3.085878 | 3.202254 | 2.545396  |
| C | 4.523046  | 2.427881 | 1.460588 | C  | -1.957657 | 6.301691 | 0.490202  |
| H | 5.440399  | 3.010805 | 1.296253 | H  | -0.925710 | 4.889150 | -0.781311 |
| H | 4.451917  | 2.162498 | 2.530229 | C  | -2.767216 | 6.472606 | 1.618173  |
| H | 4.589579  | 1.504037 | 0.869340 | H  | -3.802493 | 5.478352 | 3.238823  |
| C | -1.951397 | 3.887742 | 0.836317 | H  | -1.640185 | 7.169543 | -0.093711 |
| C | -2.768759 | 4.072817 | 1.966108 | H  | -3.083126 | 7.473944 | 1.921678  |
| C | -1.554856 | 5.020028 | 0.102606 | H  | 3.934342  | 3.753789 | -0.542463 |
| C | -3.171615 | 5.353537 | 2.354900 | Cl | 4.475642  | 4.303770 | -1.635015 |

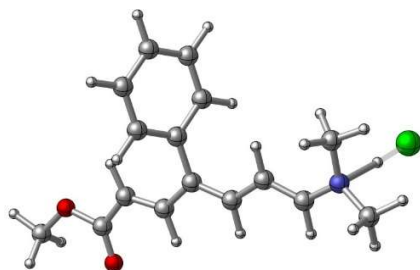

|                                              |                             |
|----------------------------------------------|-----------------------------|
| Zero-point correction=                       | 0.326200 (Hartree/Particle) |
| Thermal correction to Energy=                | 0.348200                    |
| Thermal correction to Enthalpy=              | 0.349144                    |
| Thermal correction to Gibbs Free Energy=     | 0.271055                    |
| Sum of electronic and zero-point Energies=   | -1286.121291                |
| Sum of electronic and thermal Energies=      | -1286.099291                |
| Sum of electronic and thermal Enthalpies=    | -1286.098346                |
| Sum of electronic and thermal Free Energies= | -1286.176436                |

### 3b-NH

E(scf) = -1286.44790932 a.u.

$\nu_{\min} = 18.5 \text{ cm}^{-1}$

|   |           |          |           |   |           |           |           |
|---|-----------|----------|-----------|---|-----------|-----------|-----------|
| C | 0.216220  | 2.671545 | -0.687398 | O | -5.506681 | 1.078548  | 0.560321  |
| C | -1.146048 | 2.540807 | -0.826426 | C | 2.300904  | 3.625867  | -1.645401 |
| C | -2.027474 | 1.856318 | 0.075288  | H | 2.826783  | 3.480528  | -0.698724 |
| H | -1.595975 | 1.350130 | 0.944496  | H | 0.445004  | 3.503502  | -2.675319 |
| C | -3.375722 | 1.774606 | -0.074673 | C | -6.404718 | 0.389629  | 1.429892  |
| H | -3.892979 | 2.254678 | -0.909279 | H | -6.163909 | -0.684120 | 1.475104  |
| C | 0.984866  | 3.300620 | -1.747630 | H | -6.356555 | 0.798862  | 2.451275  |
| C | -4.196257 | 1.032431 | 0.890816  | H | -7.409532 | 0.533093  | 1.013499  |
| O | -3.790250 | 0.439536 | 1.874679  | N | 3.128401  | 4.054815  | -2.671965 |

|   |           |          |           |    |           |           |           |
|---|-----------|----------|-----------|----|-----------|-----------|-----------|
| C | 2.528583  | 4.379632 | -3.963213 | C  | 1.961837  | 1.203047  | 0.380533  |
| H | 1.962833  | 3.515073 | -4.339346 | C  | 1.260489  | 2.106597  | 2.931583  |
| H | 1.848788  | 5.247872 | -3.893175 | H  | -0.191315 | 3.351985  | 1.923210  |
| H | 3.326039  | 4.608443 | -4.682267 | C  | 2.620830  | 0.702960  | 1.505980  |
| C | 4.287253  | 4.867762 | -2.294235 | H  | 2.248898  | 0.859128  | -0.616186 |
| H | 5.043718  | 4.820199 | -3.090365 | C  | 2.272585  | 1.152665  | 2.785127  |
| H | 4.007953  | 5.923956 | -2.129918 | H  | 0.987653  | 2.469199  | 3.925862  |
| H | 4.730141  | 4.472023 | -1.369470 | H  | 3.411630  | -0.041458 | 1.382995  |
| H | -1.605663 | 2.972730 | -1.722722 | H  | 2.791575  | 0.762987  | 3.664493  |
| C | 0.932016  | 2.154872 | 0.516777  | H  | 3.776907  | 2.431261  | -2.999884 |
| C | 0.594937  | 2.602677 | 1.806583  | Cl | 4.081342  | 1.153209  | -3.238208 |

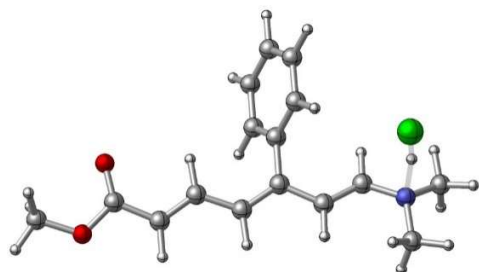

|                                              |                             |
|----------------------------------------------|-----------------------------|
| Zero-point correction=                       | 0.326183 (Hartree/Particle) |
| Thermal correction to Energy=                | 0.348161                    |
| Thermal correction to Enthalpy=              | 0.349105                    |
| Thermal correction to Gibbs Free Energy=     | 0.271647                    |
| Sum of electronic and zero-point Energies=   | -1286.121727                |
| Sum of electronic and thermal Energies=      | -1286.099748                |
| Sum of electronic and thermal Enthalpies=    | -1286.098804                |
| Sum of electronic and thermal Free Energies= | -1286.176263                |

## 7. Reference

1. Bruker AXS (2021) *APEX4 Version 2021.4-0, SAINT Version 8.40B and SADABS Bruker AXS area detector scaling and absorption correction Version 2016/2*, Bruker AXS Inc., Madison, Wisconsin, USA.
2. Sheldrick, G. M., *SHELXT – Integrated space-group and crystal-structure determination*, *Acta Cryst.*, **2015**, *A71*, 3-8.
3. Sheldrick, G.M., *Crystal structure refinement with SHELXL*, *Acta Cryst.*, **2015**, *C71 (1)*, 3-8.
4. Bruker AXS (1998) *XP – Interactive molecular graphics, Version 5.1*, Bruker AXS Inc., Madison, Wisconsin, USA.
5. (a) Lee, C.; Yang, W.; Parr, R. G., Development of the Colle-Salvetti Correlation-Energy Formula into a Functional of the Electron Density. *Phys. Rev. B* **1988**, *37*, 785–789. (b) Becke, A. D., Density-Functional Thermochemistry. III. The Role of Exact Exchange. *J. Chem. Phys.* **1993**, *98*, 5648–5652.
6. (a) Grimme, S. Accurate description of van der Waals complexes by density functional theory including empirical corrections. *J. Comput. Chem.* **2004**, *25*, 1463-1473. (b) Grimme, S.; Antony, J.; Ehrlich, S.; Krieg, H. A consistent and accurate ab initio parametrization of density functional dispersion correction (DFT-D) for the 94 elements H-Pu. *J. Chem. Phys.* **2010**, *132*, 154104. (c) Grimme, S. Density functional theory with London dispersion corrections. *WIREs Comput. Mol. Sci.* **2011**, *1*, 211-228. (d) Ehrlich, S.; Moellmann, J.; Grimme, S. Dispersion-Corrected Density Functional Theory for Aromatic Interactions in Complex Systems. *Acc. Chem. Res.* **2012**, *46*, 916-926.
7. (a) Weigend, F.; Ahlrichs, R. Balanced basis sets of split valence, triple zeta valence and quadruple zeta valence quality for H to Rn: Design and assessment of accuracy. *Phys. Chem. Chem. Phys.* **2005**, *7*, 3297-3305. (b) Weigend, F. Accurate Coulomb-fitting basis sets for H to Rn. *Phys. Chem. Chem. Phys.* **2006**, *8*, 1057-1065.
8. (a) Klamt, A.; Schüürmann, G. COSMO: a new approach to dielectric screening in solvents with explicit expressions for the screening energy and its gradient. *J. Chem. Soc. Perkin Trans. 2* **1993**, *0*, 799-805. (b) Tomasi, J.; Persico, M. Molecular Interactions in Solution: An Overview of Methods Based on Continuous Distributions of the Solvent. *Chem. Rev.* **1994**, *94*, 2027-2094. (c) Andzelm, J.; Kölmel, C.; Klamt, A. Incorporation of solvent effects into density functional calculations of molecular energies and geometries. *J. Chem. Phys.* **1995**, *103*, 9312-9320. (d) Barone, V.; Cossi, M. Quantum Calculation of Molecular Energies and Energy Gradients in Solution by a Conductor Solvent Model. *J. Phys. Chem. A* **1998**, *102*, 1995-2001. (e) Cossi, M.; Rega, N.; Scalmani, G.; Barone, V. Energies, structures, and electronic properties of molecules in solution with the C-PCM solvation model. *J. Comput. Chem.* **2003**, *24*, 669-681.
9. Gaussian 16, Revision C.01, Frisch, M. J.; Trucks, G. W.; Schlegel, H. B.; Scuseria, G. E.; Robb, M. A.; Cheeseman, J. R.; Scalmani, G.; Barone, V.; Petersson, G. A.; Nakatsuji, H.; Li, X.; Caricato, M.; Marenich,

A. V.; Bloino, J.; Janesko, B. G.; Gomperts, R.; Mennucci, B.; Hratchian, H. P.; Ortiz, J. V.; Izmaylov, A. F.; Sonnenberg, J. L.; Williams-Young, D.; Ding, F.; Lipparini, F.; Egidi, F.; Goings, J.; Peng, B.; Petrone, A.; Henderson, T.; Ranasinghe, D.; Zakrzewski, V. G.; Gao, J.; Rega, N.; Zheng, G.; Liang, W.; Hada, M.; Ehara, M.; Toyota, K.; Fukuda, R.; Hasegawa, J.; Ishida, M.; Nakajima, T.; Honda, Y.; Kitao, O.; Nakai, H.; Vreven, T.; Throssell, K.; Montgomery, J. A., Jr.; Peralta, J. E.; Ogliaro, F.; Bearpark, M. J.; Heyd, J. J.; Brothers, E. N.; Kudin, K. N.; Staroverov, V. N.; Keith, T. A.; Kobayashi, R.; Normand, J.; Raghavachari, K.; Rendell, A. P.; Burant, J. C.; Iyengar, S. S.; Tomasi, J.; Cossi, M.; Millam, J. M.; Klene, M.; Adamo, C.; Cammi, R.; Ochterski, J. W.; Martin, R. L.; Morokuma, K.; Farkas, O.; Foresman, J. B.; Fox, D. J. Gaussian, Inc., Wallingford CT, 2016.

10. Legault, C. Y. (2009) CYLview, 1.0b, Université de Sherbrooke: Sherbrooke, Canada, <http://www.cylview.org>.



## 8. Copies of $^1\text{H}$ , $^{13}\text{C}$ and $^{19}\text{F}$ NMR spectra

RAW Data/wfp-wb-443-proton-CDCl3 — glo wfp wb 443 — proton CDCl3 /opt/topspin av1 16 — 400.35MHz

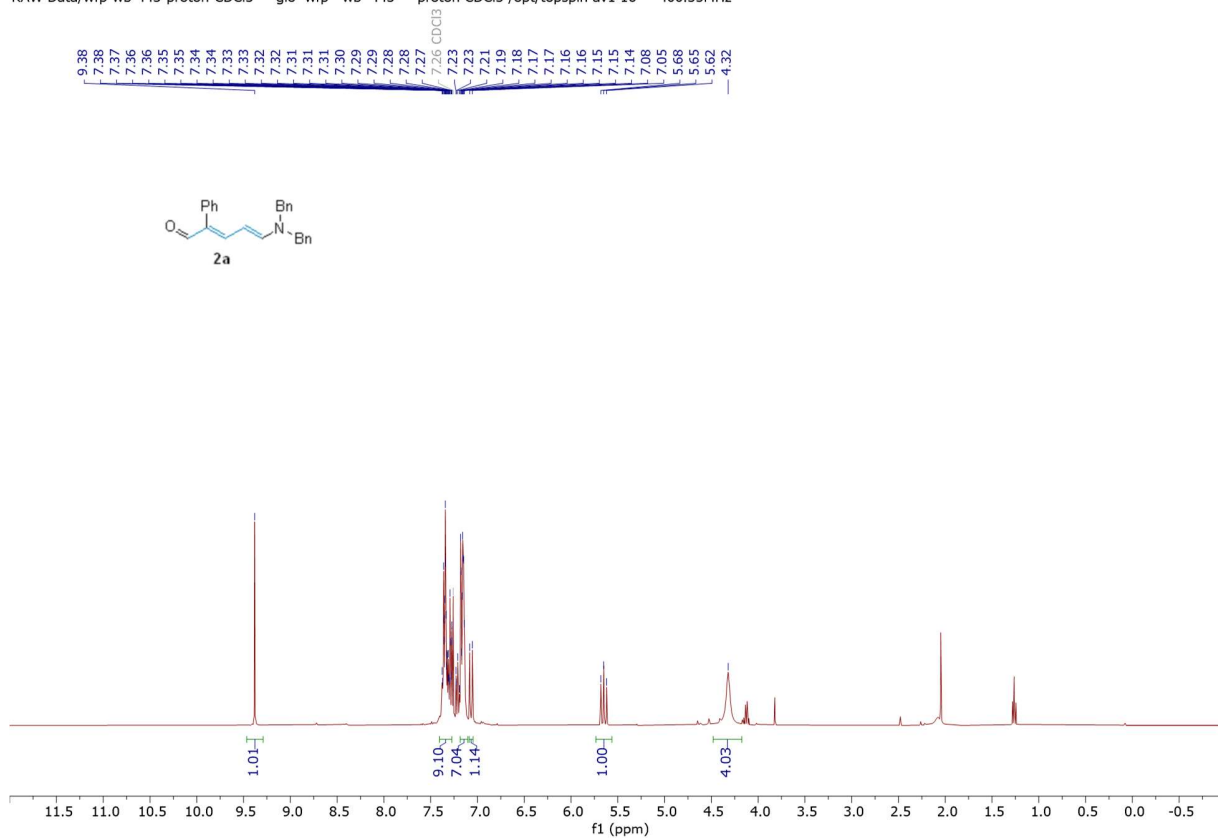

RAW Data/wfp-wb-443-carbon\_256-CDCl3 — glo wfp wb 443 — carbon\_256 CDCl3 /opt/topspin av1 16 — 100.68MHz

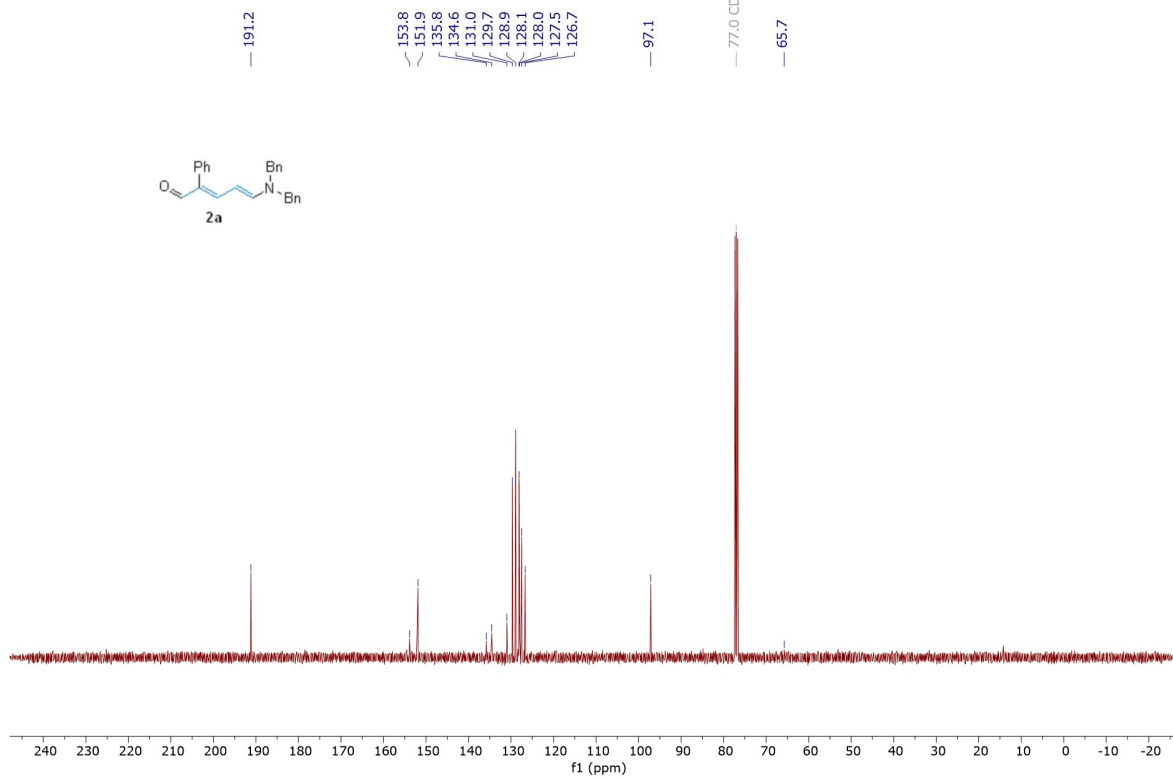

472/wfp-wb-472-proton-CDCl3-2 — glo wfp wb 472 — proton CDCl3 /opt/topspin av1 2 — 400.35MHz

8.31  
8.31  
8.31  
8.30  
8.30  
8.30  
8.06  
8.06  
8.06  
8.05  
8.05  
8.04  
8.04  
8.03  
7.80  
7.80  
7.80  
7.79  
7.78  
7.78  
7.77  
7.77  
7.65  
7.65  
7.64  
7.63  
7.63  
7.54  
7.54  
7.52  
7.52  
7.50  
7.50  
7.49  
7.48  
7.48  
7.47  
7.47  
7.46  
7.46  
7.41  
7.41  
7.40  
7.39  
7.38  
7.37  
7.37  
7.26 CDCl3  
4.46  
4.44  
4.42  
4.40  
1.45  
1.43  
1.41

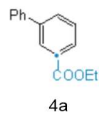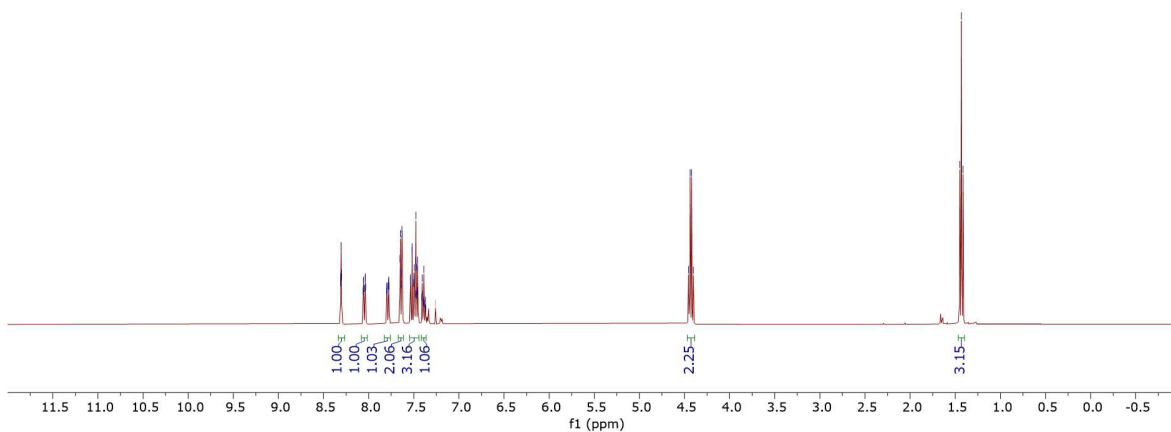

472/wfp-wb-472-carbon\_256-CDCl3 — glo wfp wb 472 — carbon\_256 CDCl3 /opt/topspin av1 2 — 100.68MHz

166.5  
141.4  
140.2  
131.4  
131.0  
128.8  
128.8  
128.3  
128.2  
127.7  
127.1  
77.0 CDCl3  
61.0  
14.3

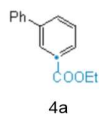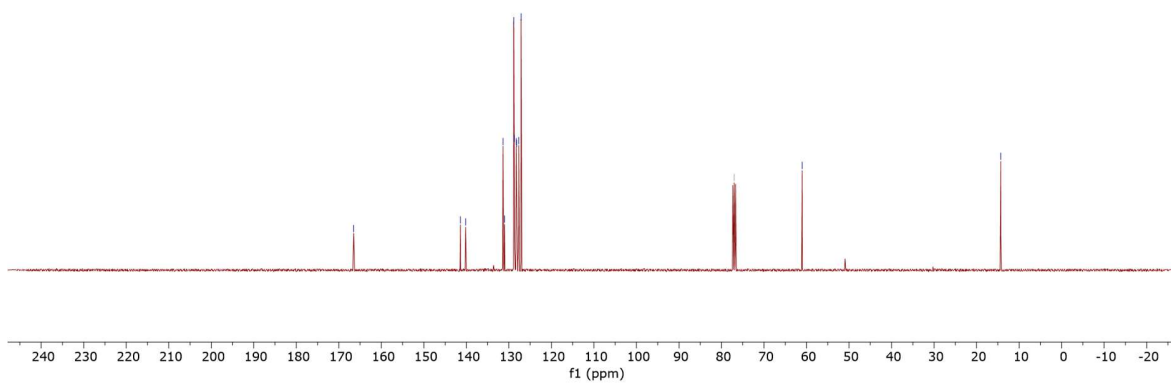

RAW Data/wfp-wb-491-proton-CDCl3-3 — glo wfp wb 491 — proton CDCl3 /opt/topspin av1 17 — 400.13MHz

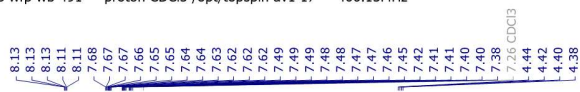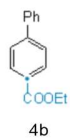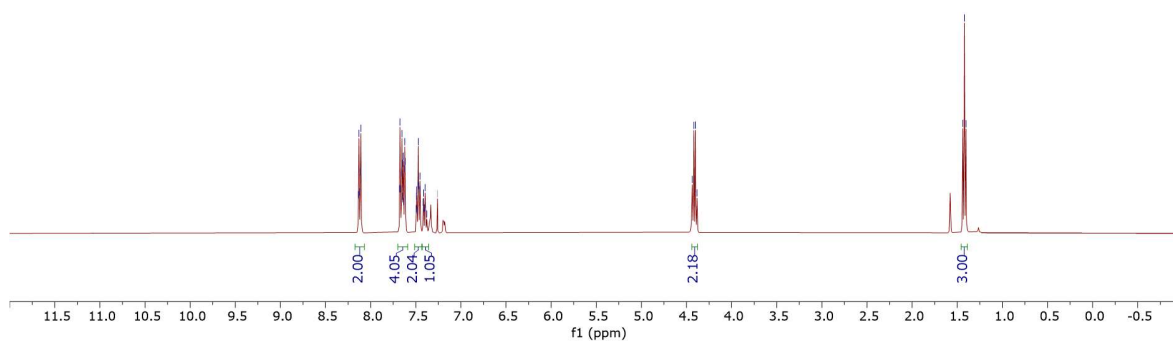

RAW Data/wfp-wb-491-carbon\_256-CDCl3-2 — glo wfp wb 491 — carbon\_256 CDCl3 /opt/topspin av1 17 — 100.62MHz

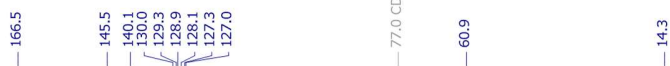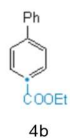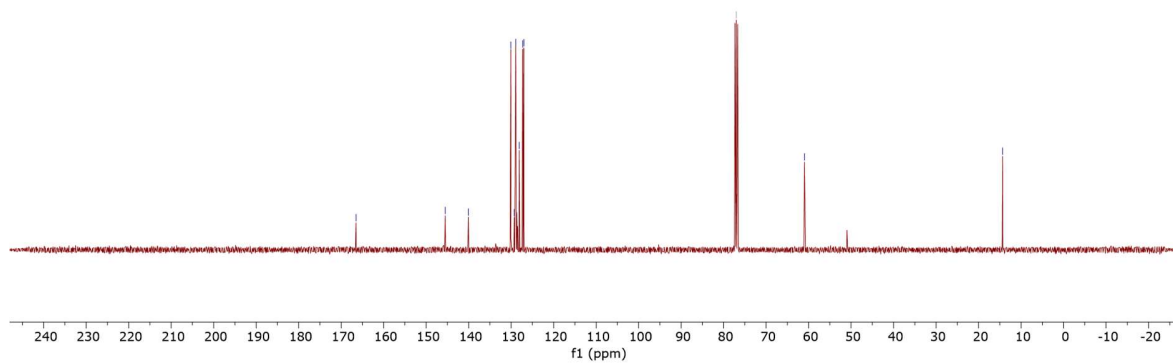

504/wfp-wb-503-2-proton-CDCl3 — glo wfp wb 503 2 — proton CDCl3 /opt/topspin av1 12 — 400.35MHz

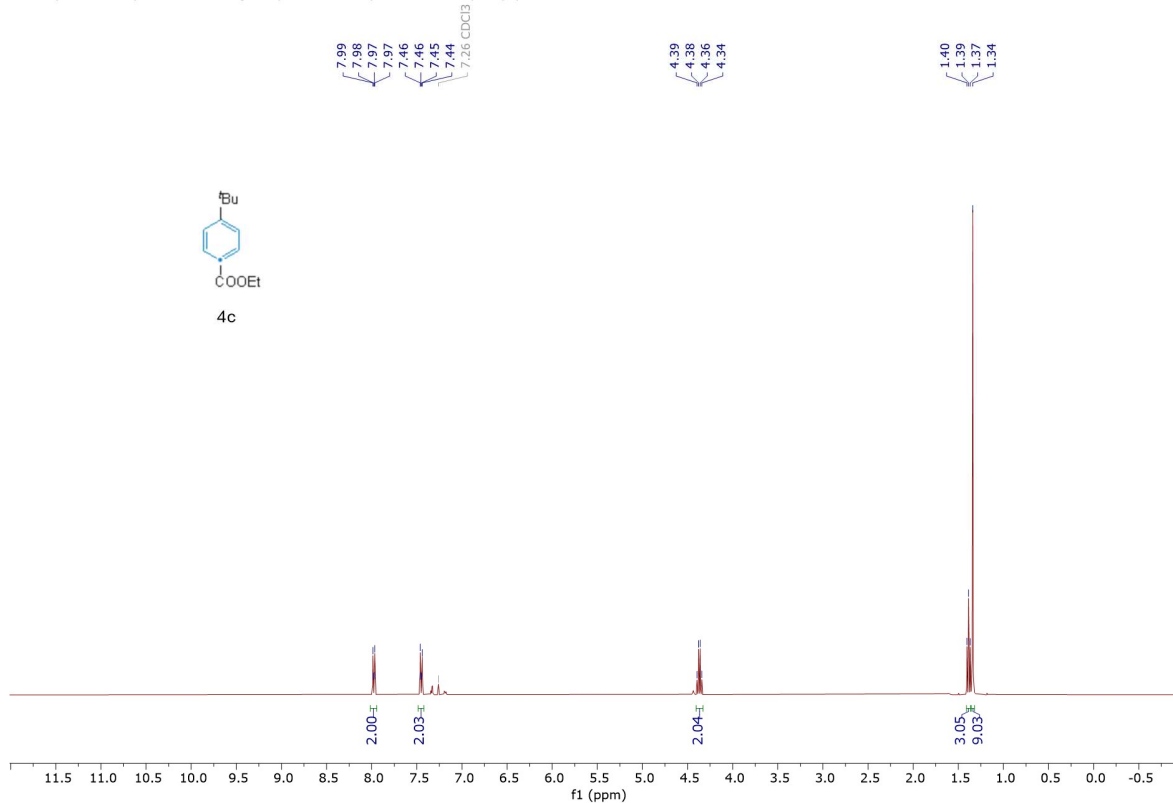

504/wfp-wb-503-2-carbon\_256-CDCl3 — glo wfp wb 503 2 — carbon\_256 CDCl3 /opt/topspin av1 12 — 100.68MHz

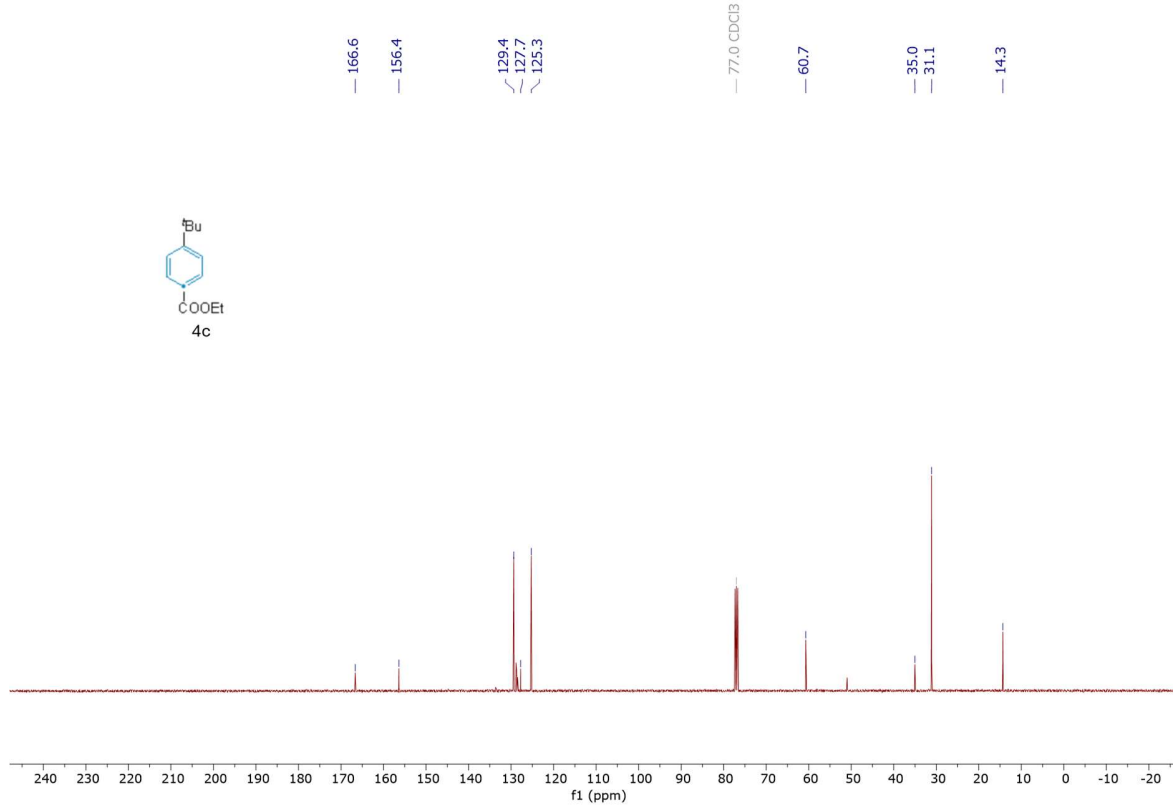

515/wfp-wb-515-proton-CDCl3 — glo wfp wb 513 2 — proton CDCl3 /opt/topspin av1 2 — 400.35MHz

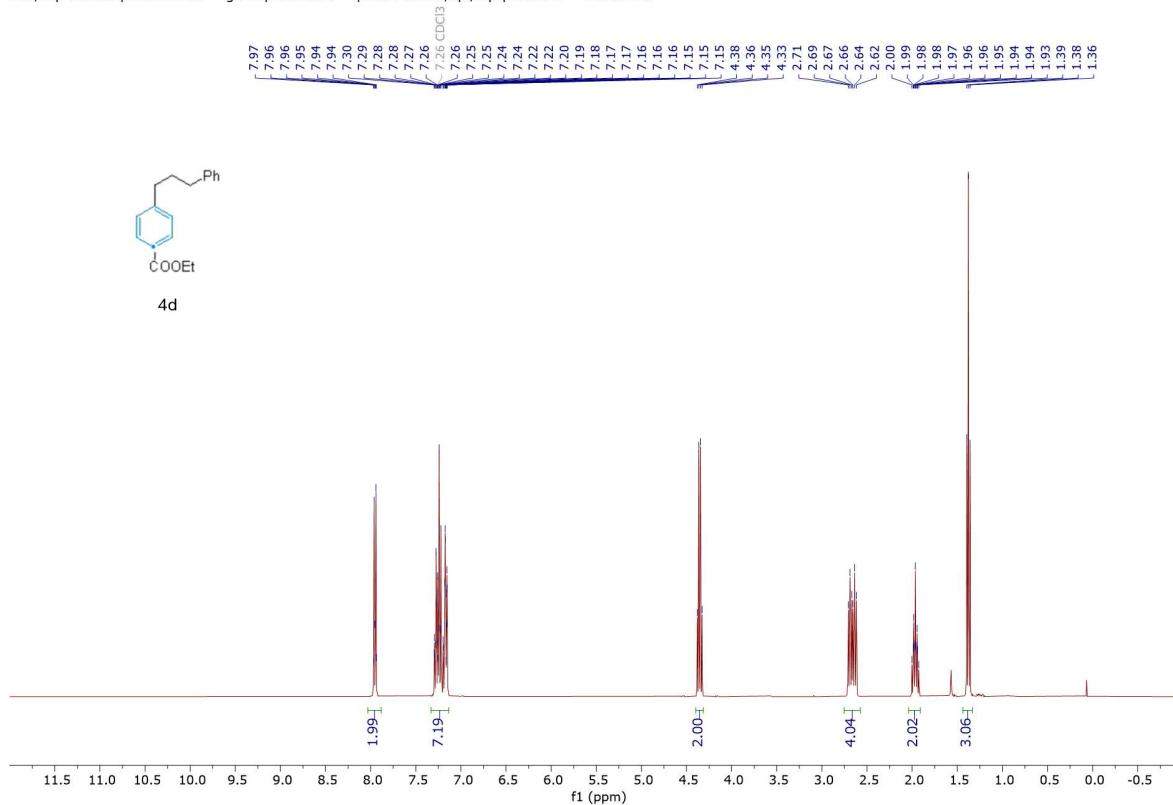

515/wfp-wb-515-carbon\_256-CDCl3 — glo wfp wb 513 2 — carbon\_256 CDCl3 /opt/topspin av1 2 — 100.68MHz

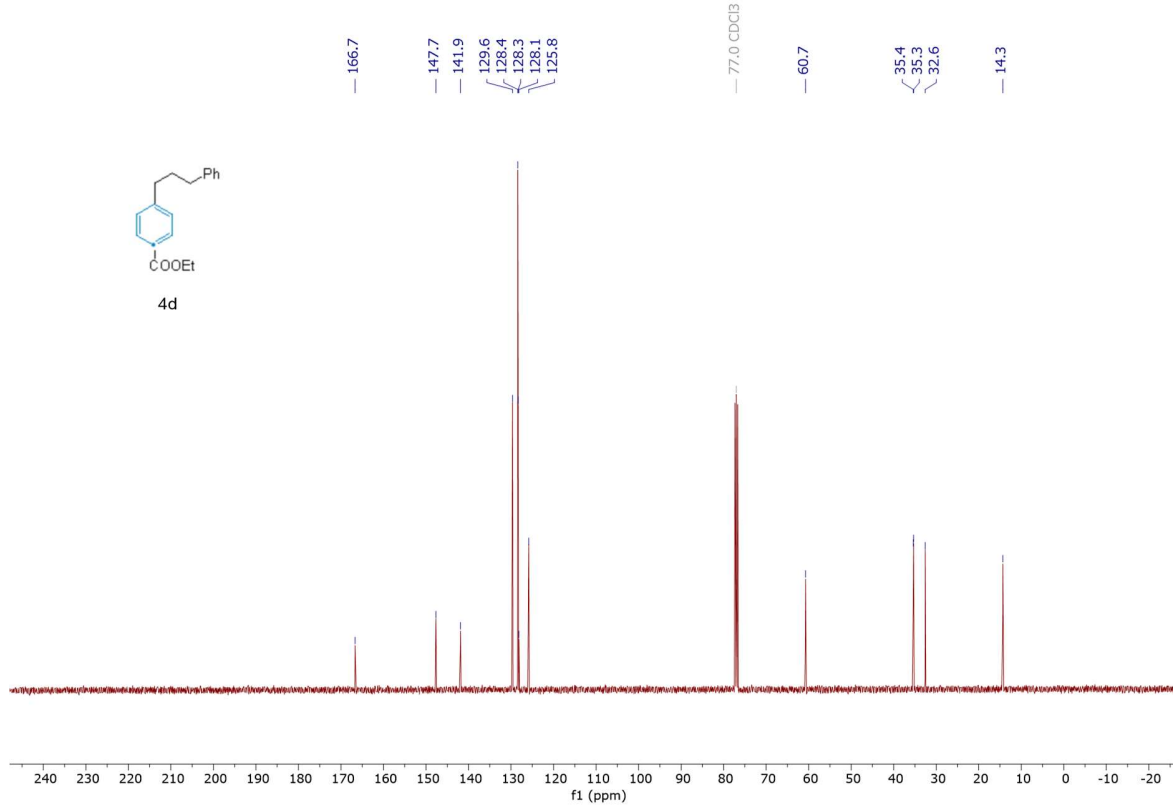

509/wfp-wb-507-3-proton-CDCl3 — glo wfp wb 507 3 — proton CDCl3 /opt/topspin av1 13 — 400.35MHz

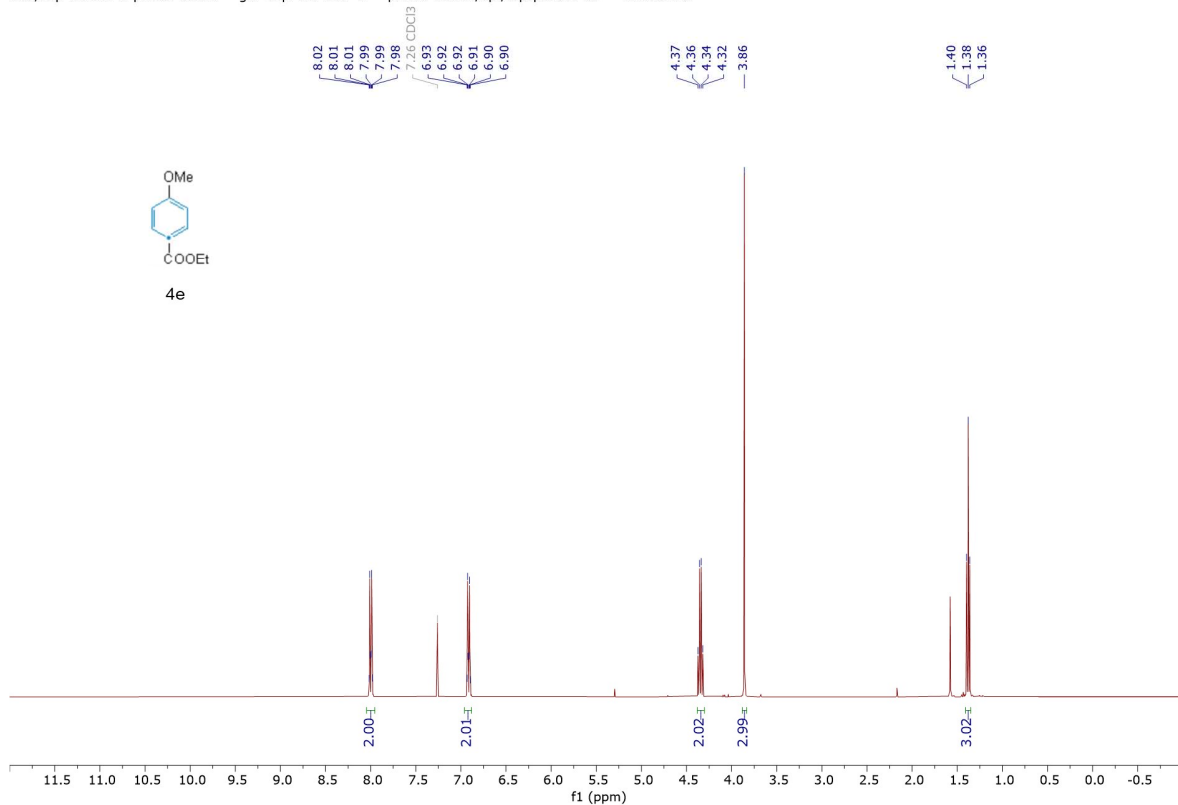

509/wfp-wb-507-3-carbon\_256-CDCl3 — glo wfp wb 507 3 — carbon\_256 CDCl3 /opt/topspin av1 13 — 100.68MHz

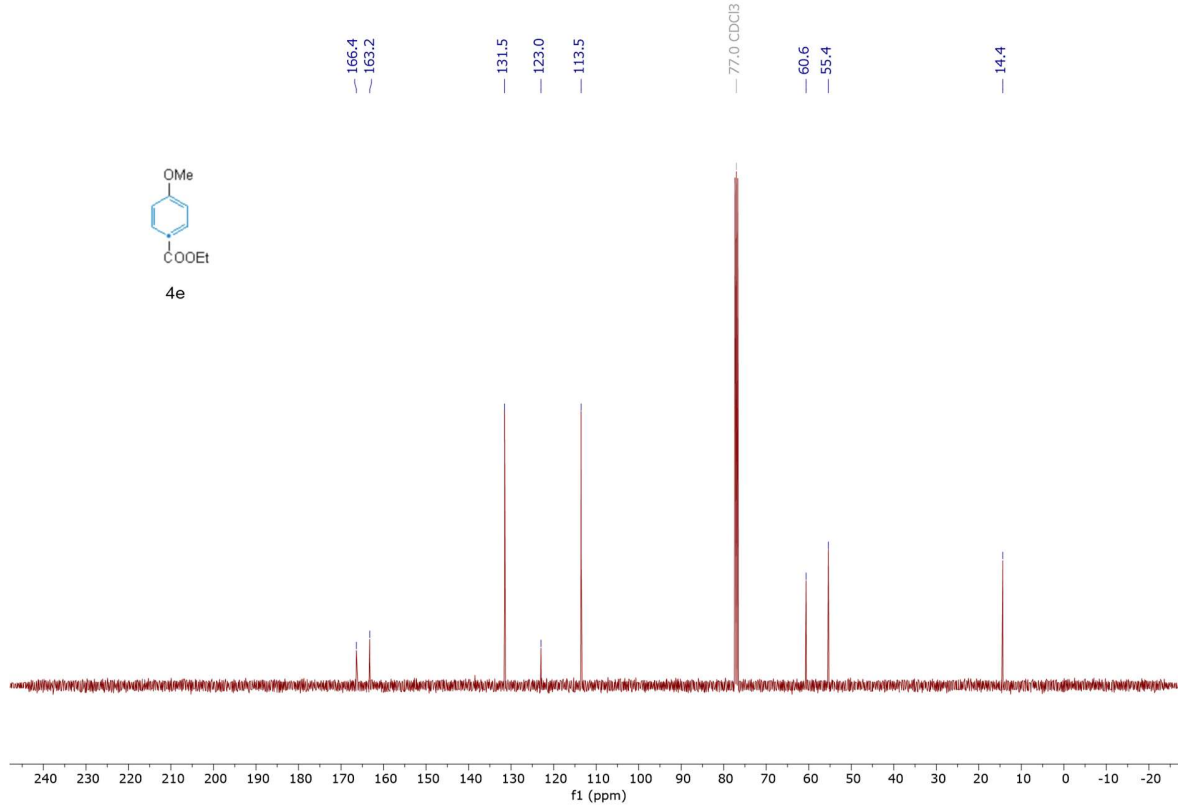

513/wfp-wb-513-1-proton-CDCl3 — glo wfp wb 513 1 — proton CDCl3 /opt/topspin av1 1 — 400.35MHz

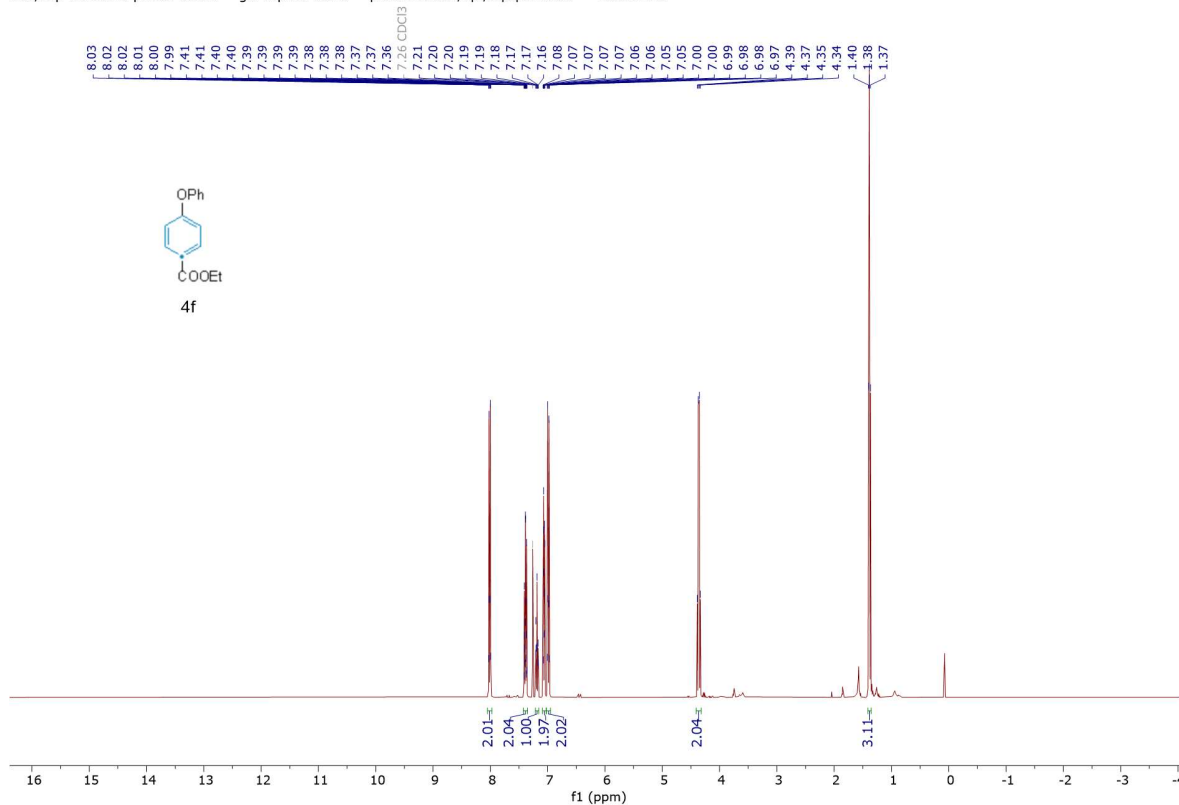

513/wfp-wb-513-1-carbon\_256-CDCl3 — glo wfp wb 513 1 — carbon\_256 CDCl3 /opt/topspin av1 1 — 100.68MHz

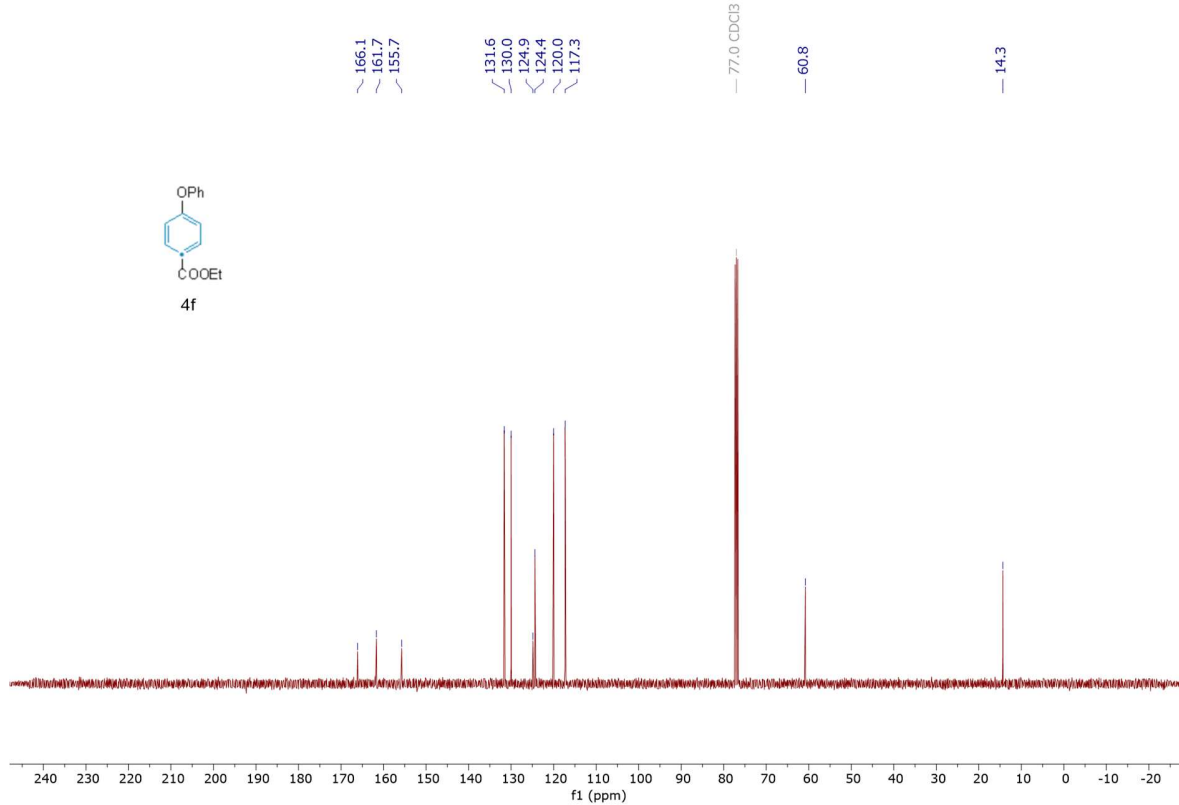



503/wfp-wb-503-1-proton-CDCl3 — glo wfp wb 503 1 — proton CDCl3 /opt/topspin av1 11 — 400.35MHz

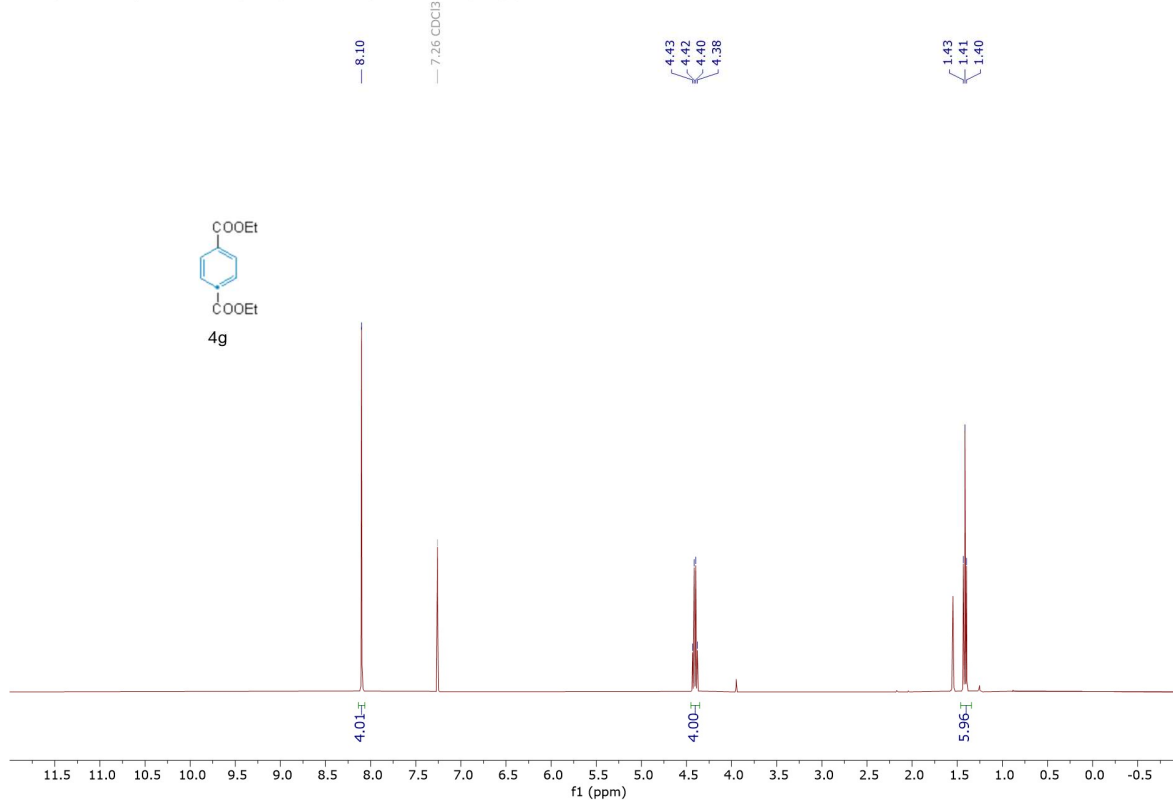

503/wfp-wb-503-1-carbon\_256-CDCl3 — glo wfp wb 503 1 — carbon\_256 CDCl3 /opt/topspin av1 11 — 100.68MHz

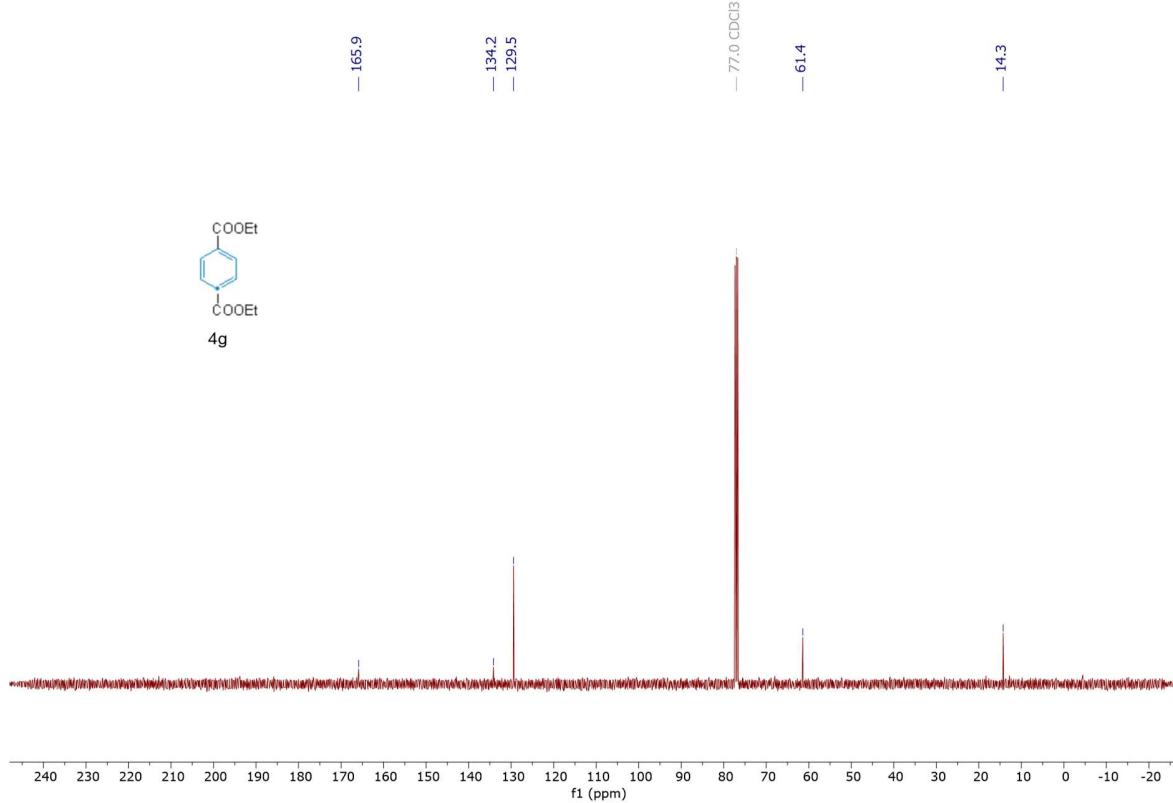

506/wfp-wb-503-3-proton-CDCl3 — glo wfp wb 503 3 — proton CDCl3 /opt/topspin av1 13 — 400.35MHz

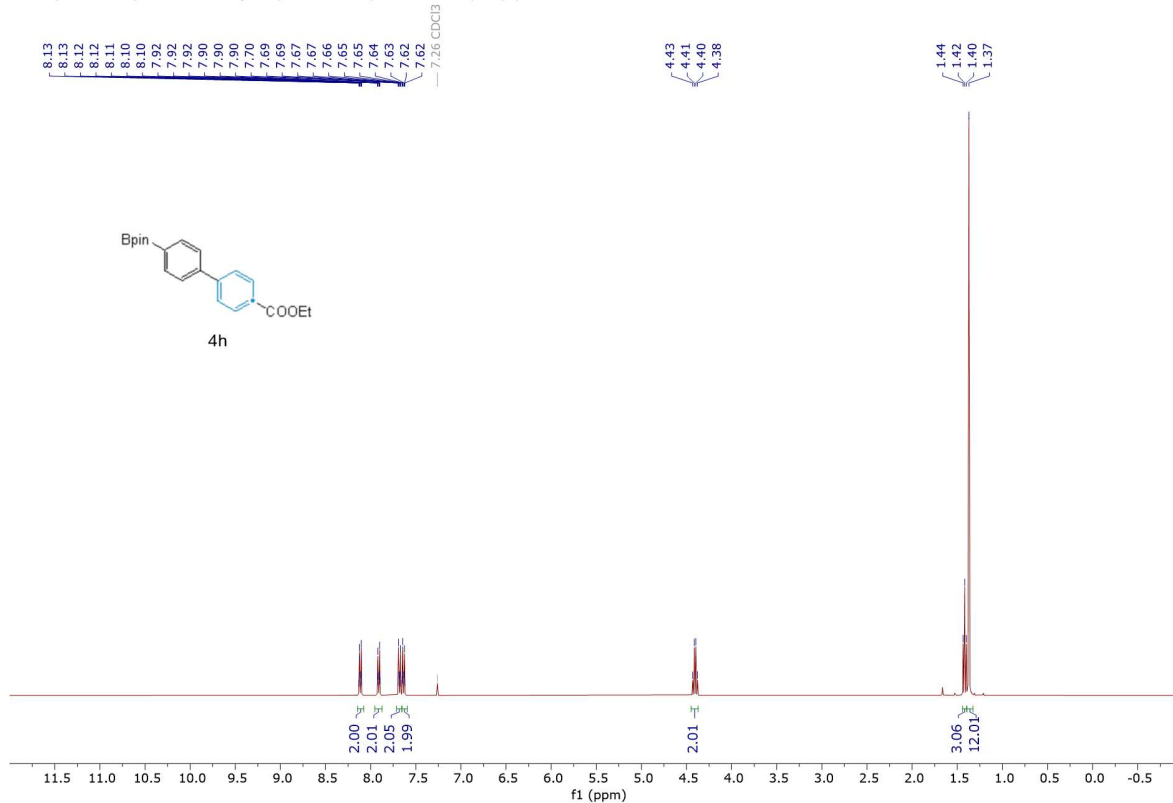

506/wfp-wb-503-3-carbon\_256-CDCl3 — glo wfp wb 503 3 — carbon\_256 CDCl3 /opt/topspin av1 13 — 100.68MHz

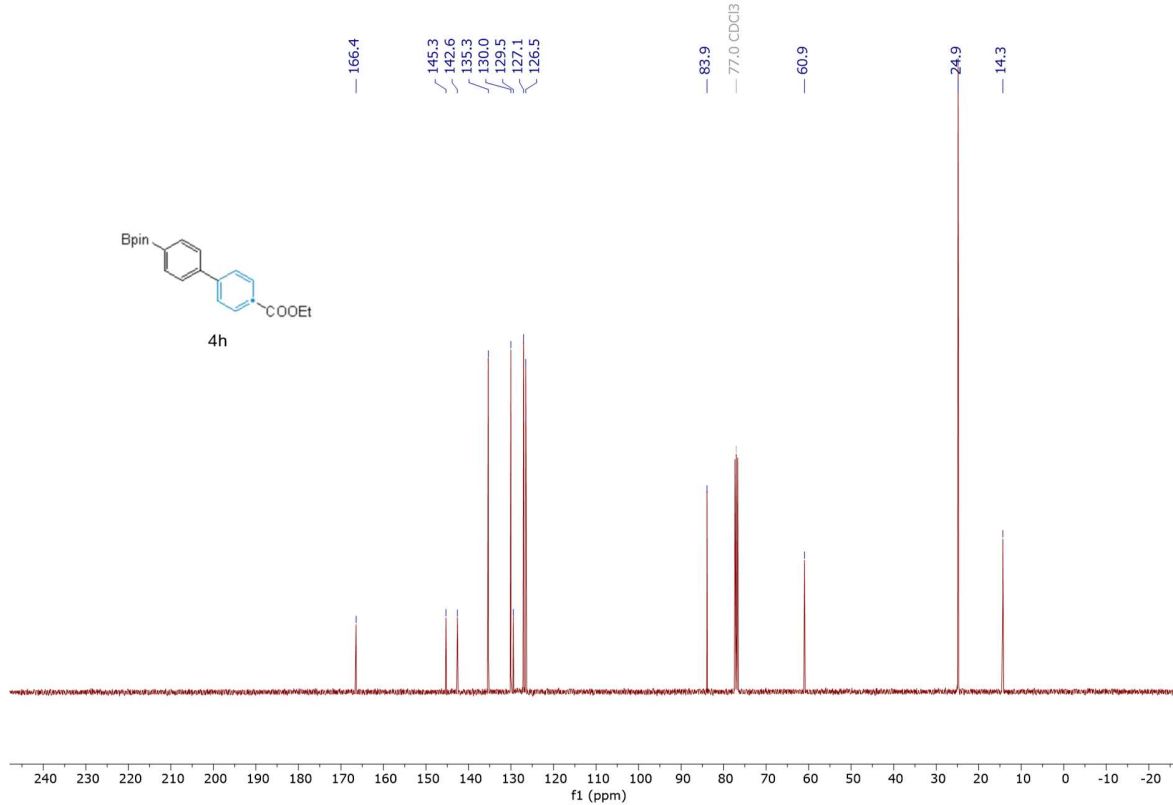

507/wfp-wb-507-1-proton-CDCl3 — glo wfp wb 507 1 — proton CDCl3 /opt/topspin av1 11 — 400.35MHz

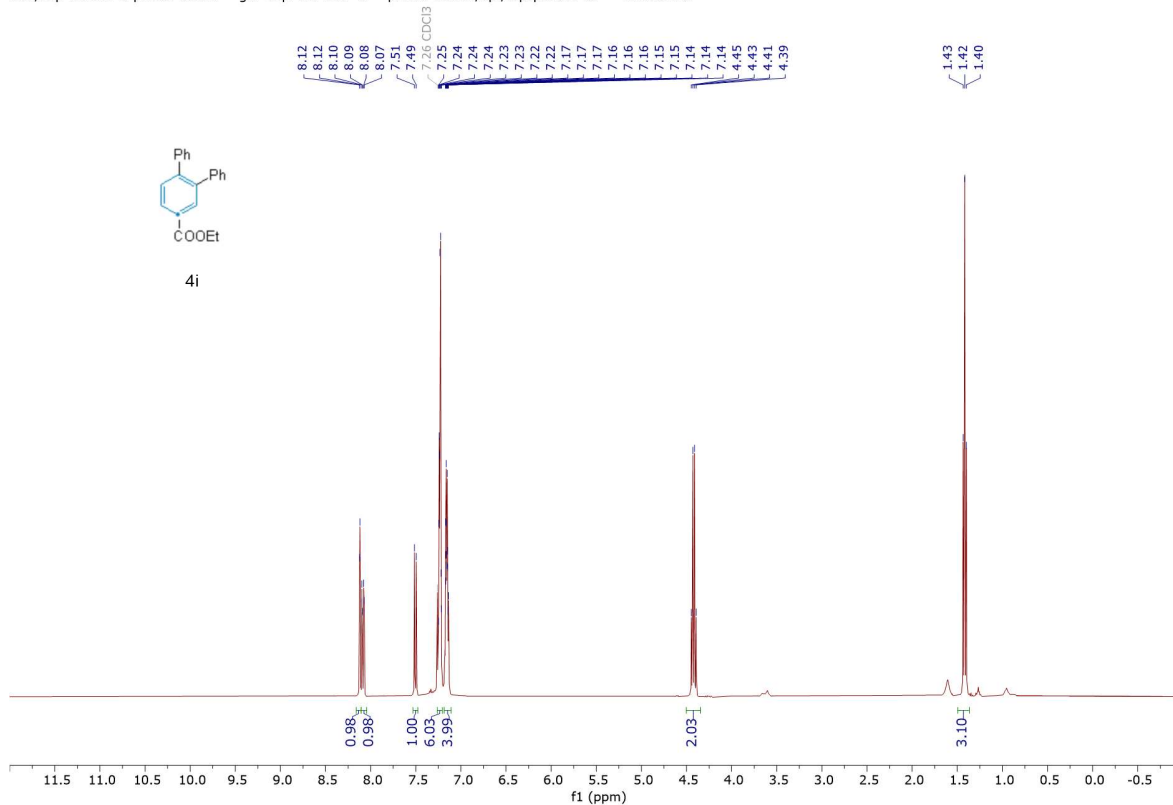

507/wfp-wb-507-1-carbon\_256-CDCl3 — glo wfp wb 507 1 — carbon\_256 CDCl3 /opt/topspin av1 11 — 100.68MHz

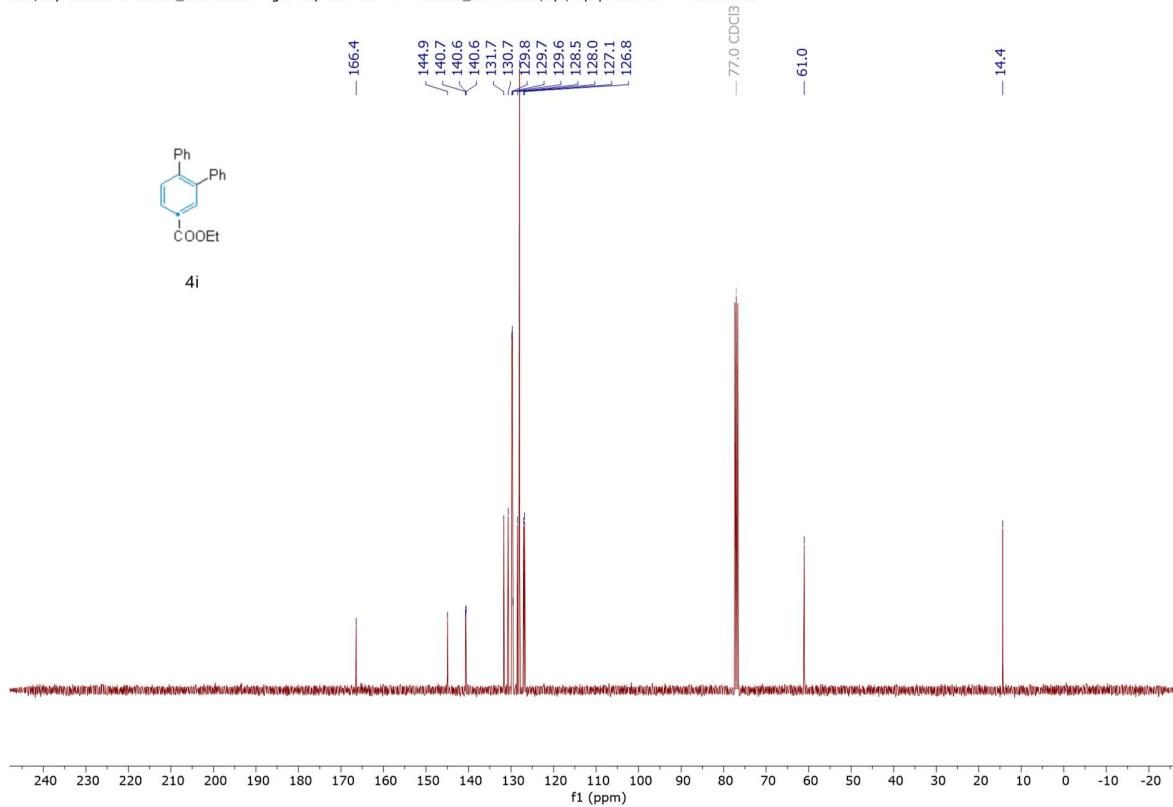

RAW Data/wfp-wb-524-proton-CDCl3 — glo wfp wb 524 — proton CDCl3 /opt/topspin av1 3 — 400.35MHz

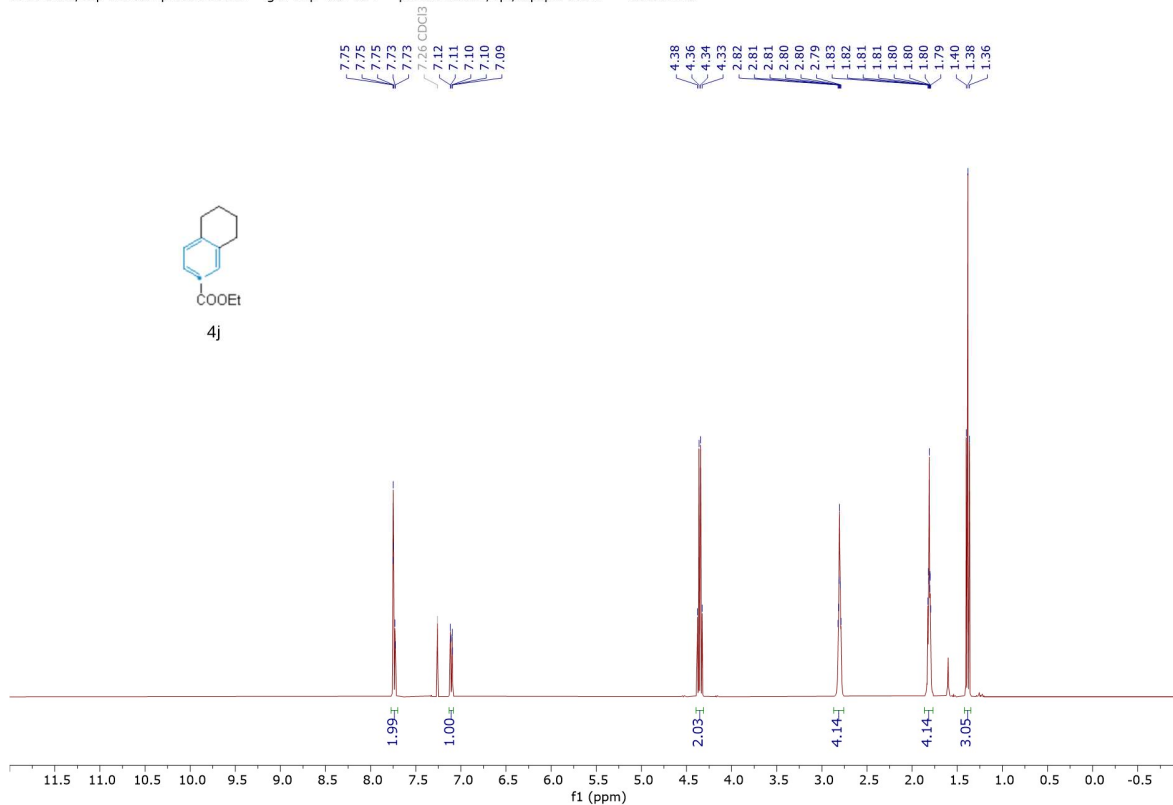

RAW Data/wfp-wb-524-carbon-CDCl3 — glo wfp wb 524 — carbon CDCl3 /opt/topspin av1 3 — 100.68MHz

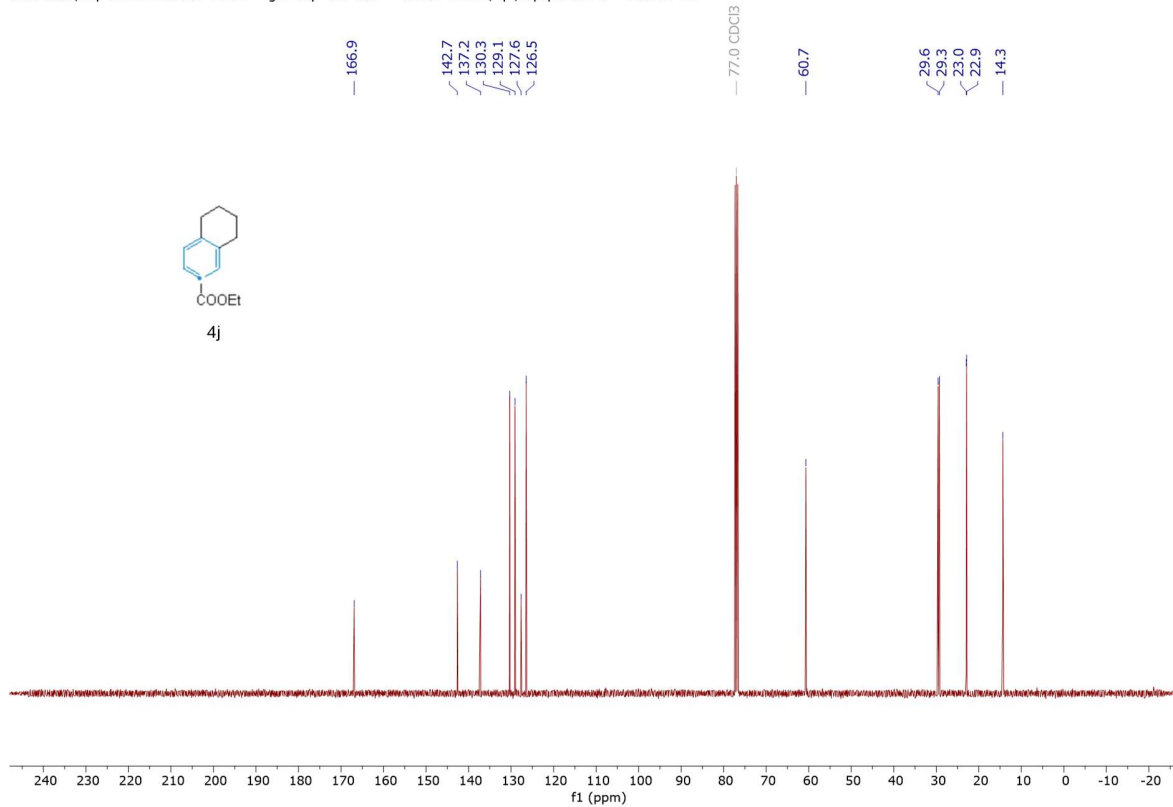

488/wfp-wb-488-proton-CDCl3-2 — glo wfp wb 488 — proton CDCl3 /opt/topspin av1 2 — 400.35MHz

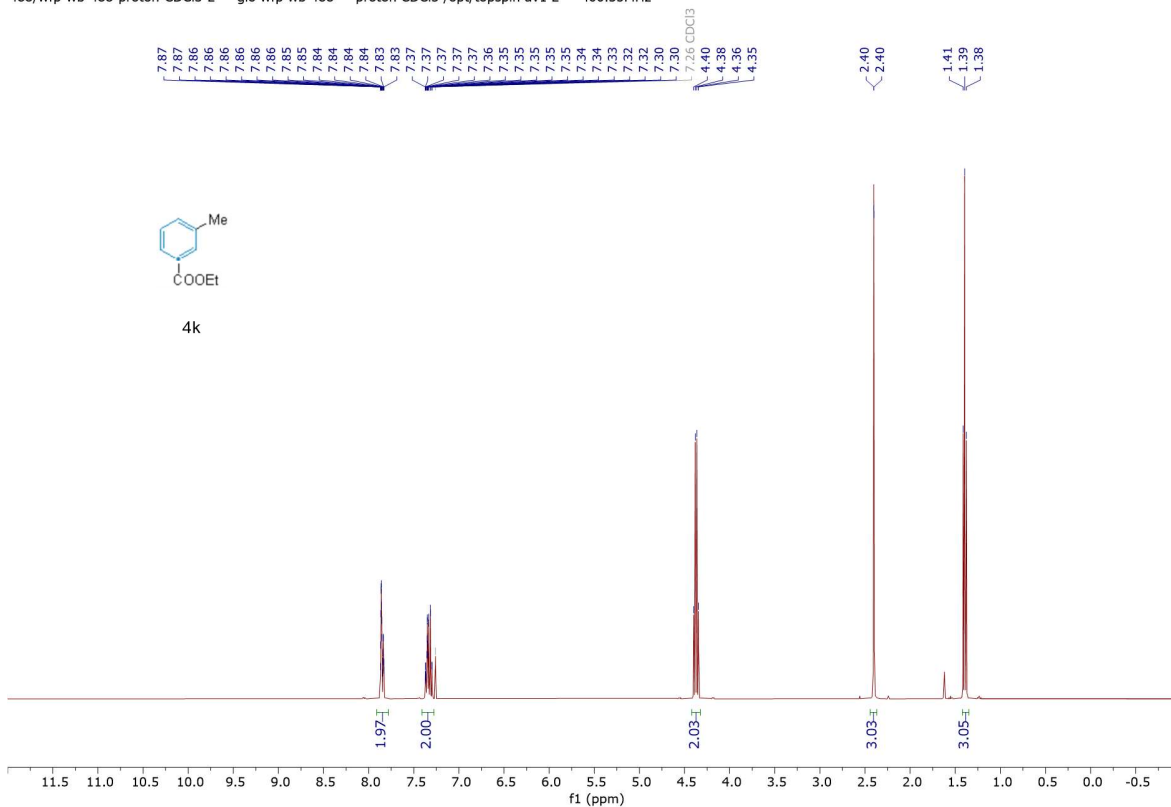

488/wfp-wb-488-carbon\_256-CDCl3-2 — glo wfp wb 488 — carbon\_256 CDCl3 /opt/topspin av1 2 — 100.68MHz

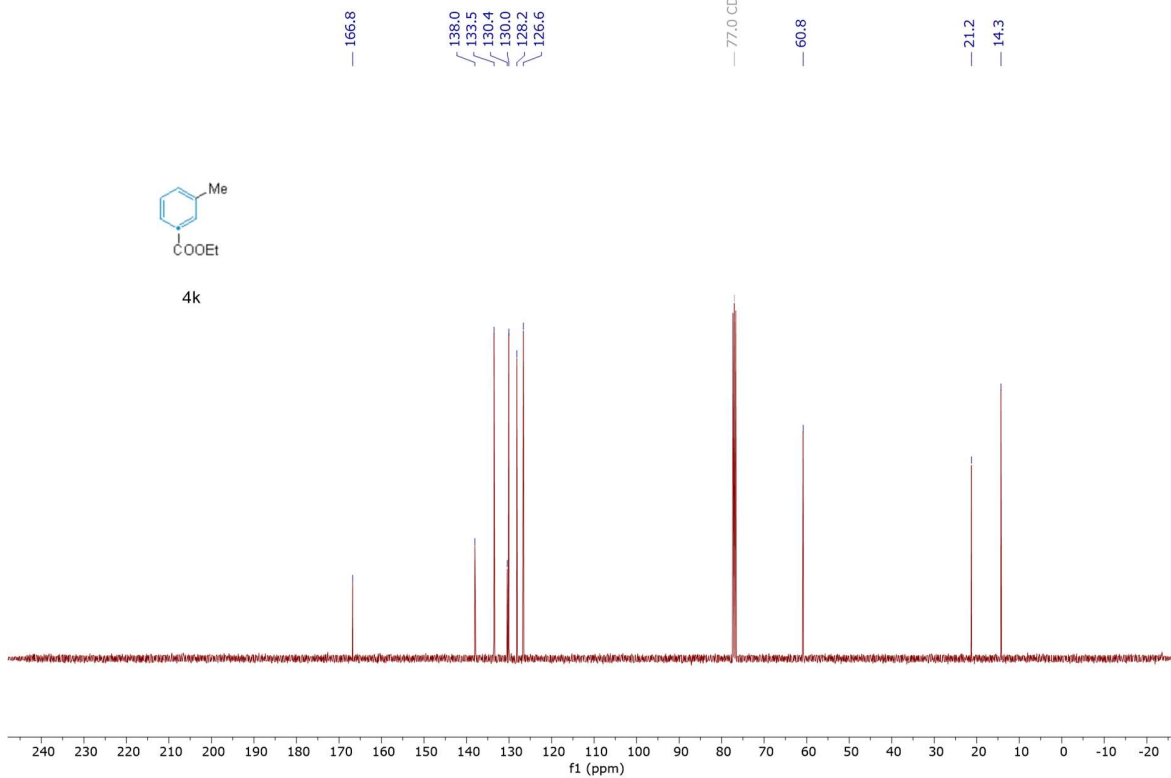

501/wfp-wb-501-2-proton-CDCl3 — glo wfp wb 501 2 — proton CDCl3 /opt/topspin av1 22 — 400.13MHz

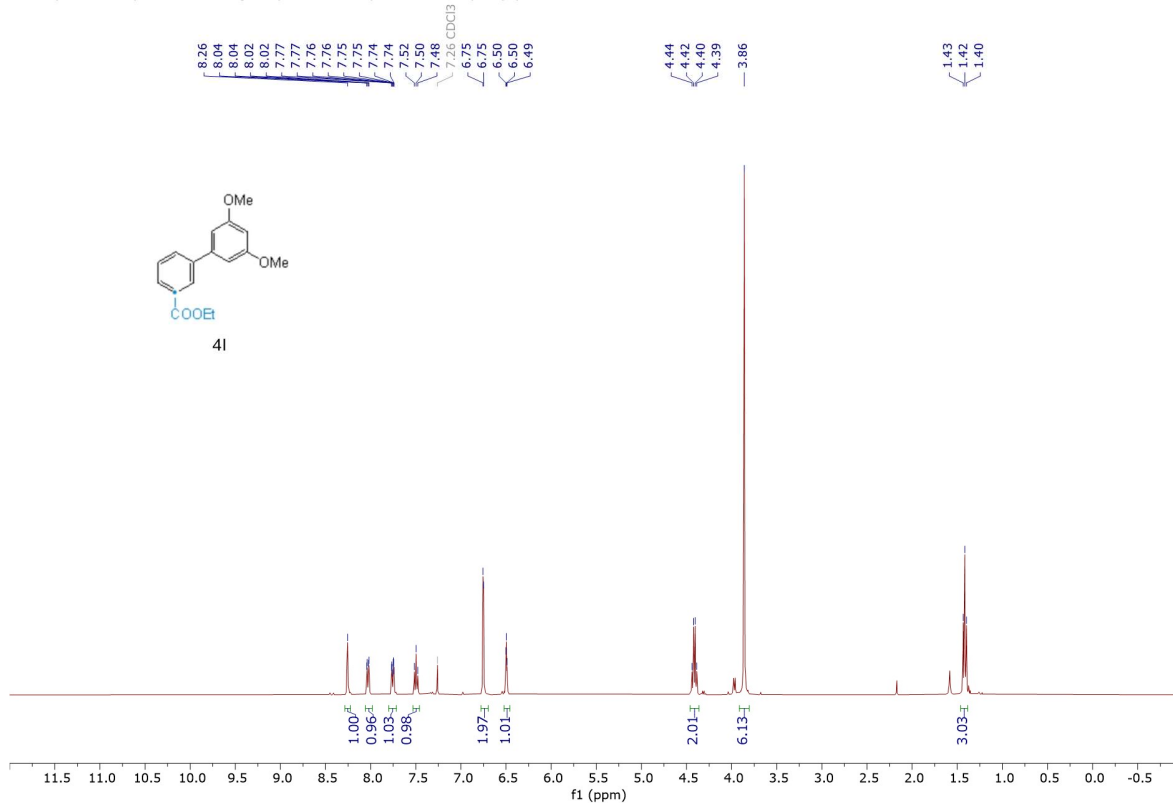

501/wfp-wb-501-2-carbon\_256-CDCl3 — glo wfp wb 501 2 — carbon\_256 CDCl3 /opt/topspin av1 22 — 100.62MHz

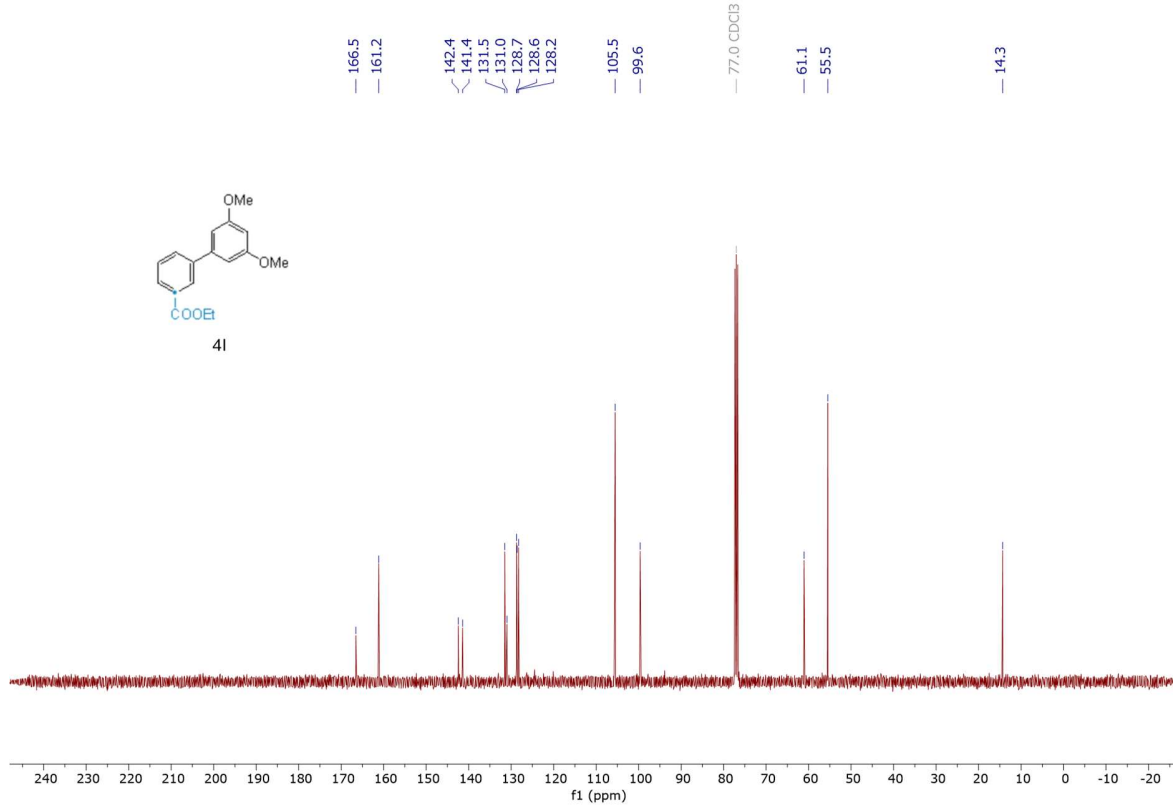

RAW Data/wfp-wb-503-4-proton-CDCl3 — glo wfp wb 503 4 — proton CDCl3 /opt/topspin av1 14 — 400.35MHz

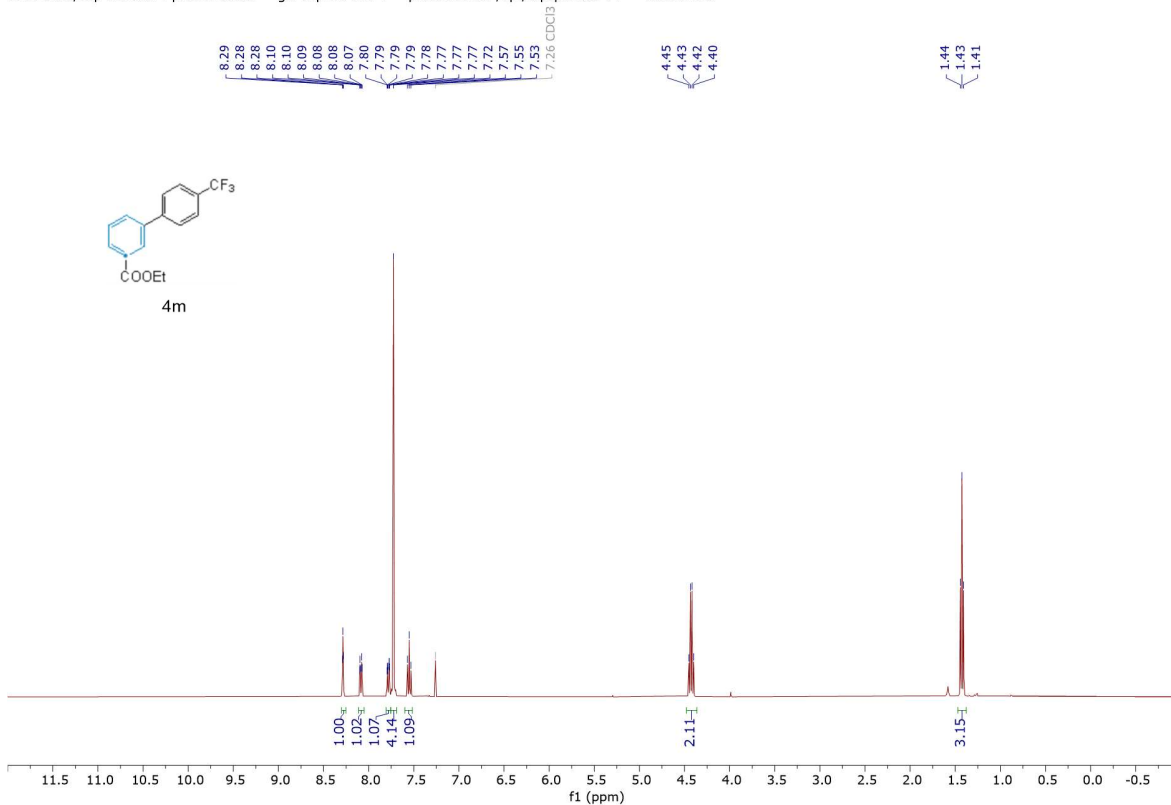

500/wfp-wb-503-4-carbon\_256-CDCl3 — glo wfp wb 503 4 — carbon\_256 CDCl3 /opt/topspin av1 14 — 100.68MHz

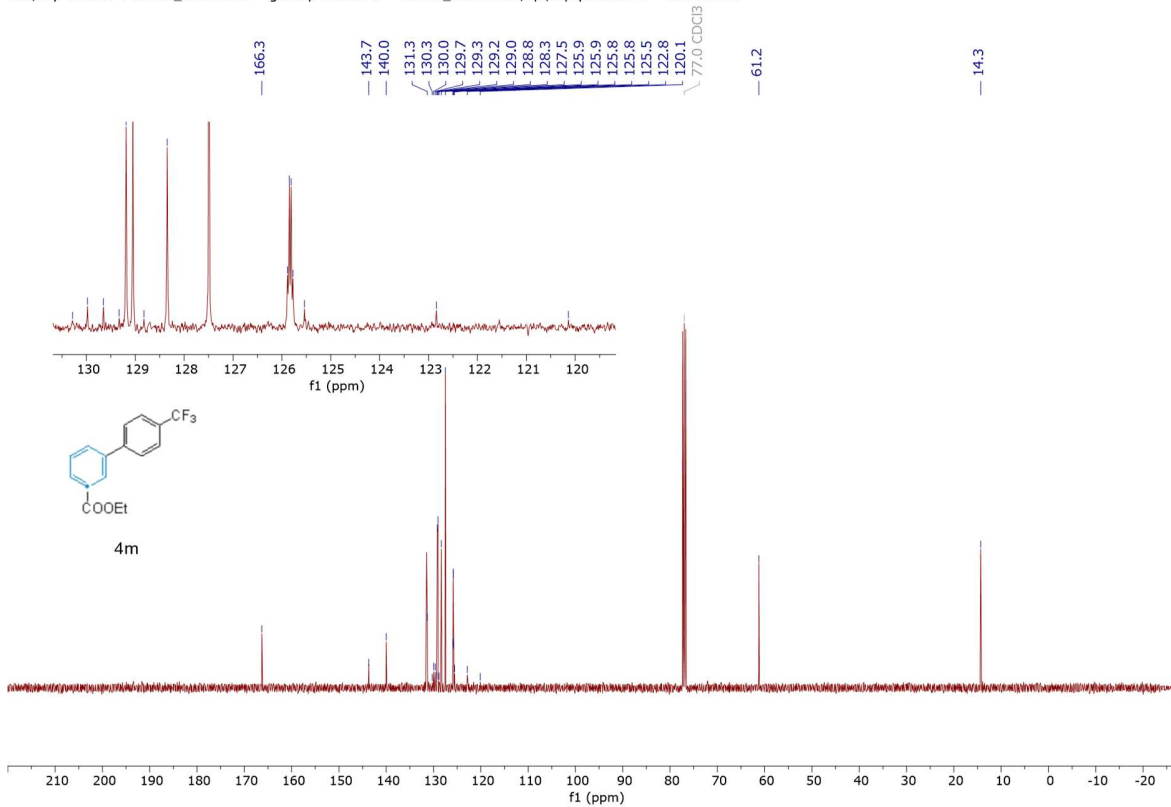

508/wfp-wb-507-2-proton-CDCl3 — glo wfp wb 507 2 — proton CDCl3 /opt/topspin av1 12 — 400.35MHz

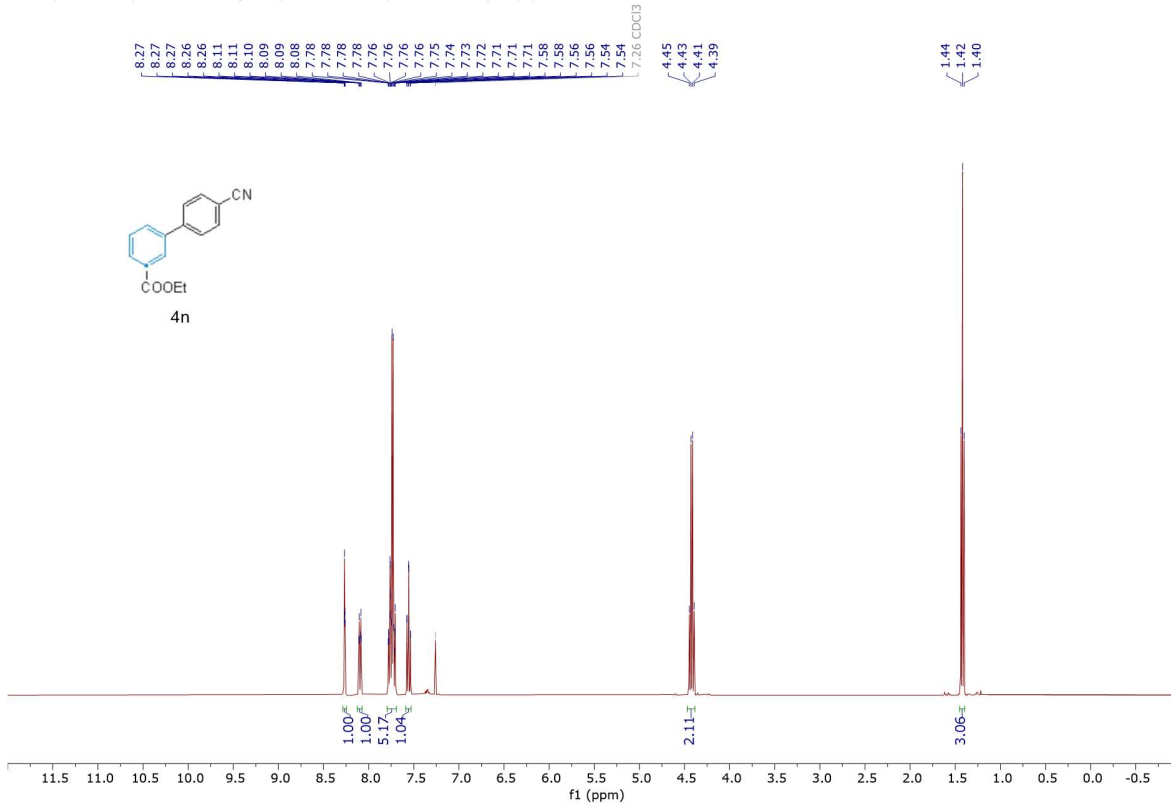

508/wfp-wb-507-2-carbon\_256-CDCl3 — glo wfp wb 507 2 — carbon\_256 CDCl3 /opt/topspin av1 12 — 100.68MHz

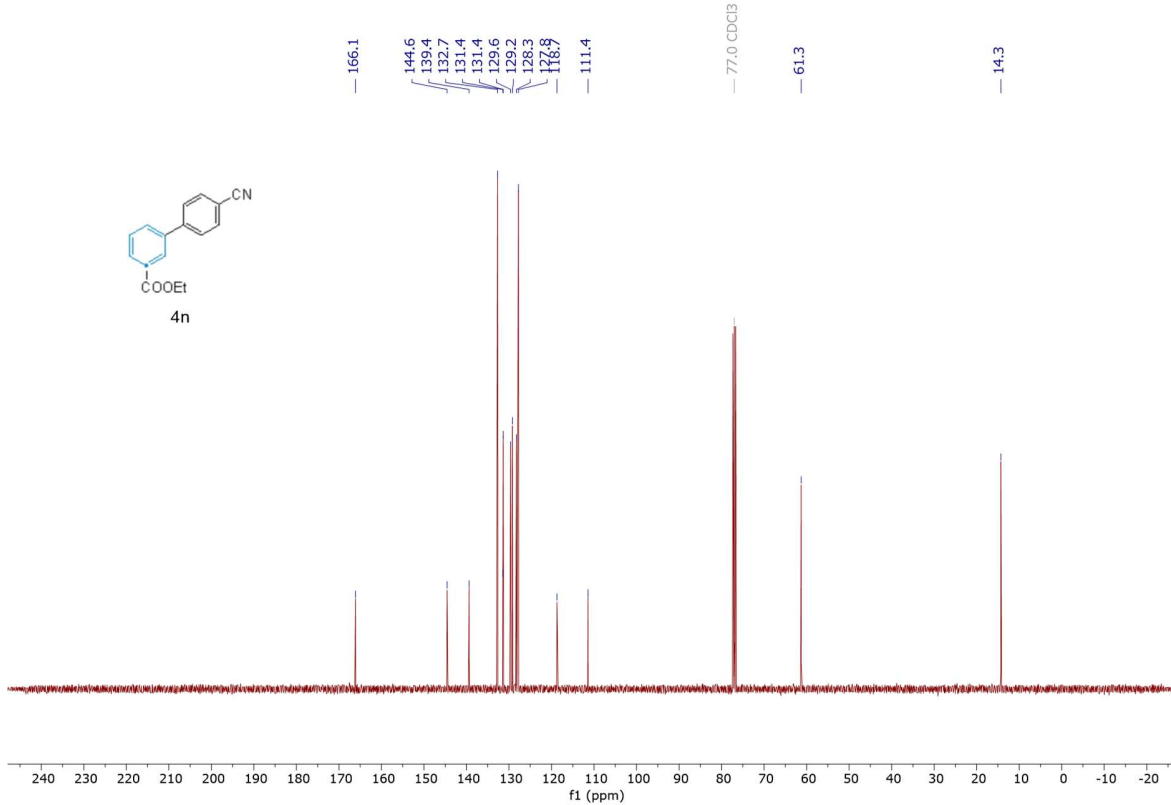



RAW Data/wfp-wb-501-3-proton-CDCl3 — glo wfp wb 501 3 — proton CDCl3 /opt/topspin av1 23 — 400.13MHz

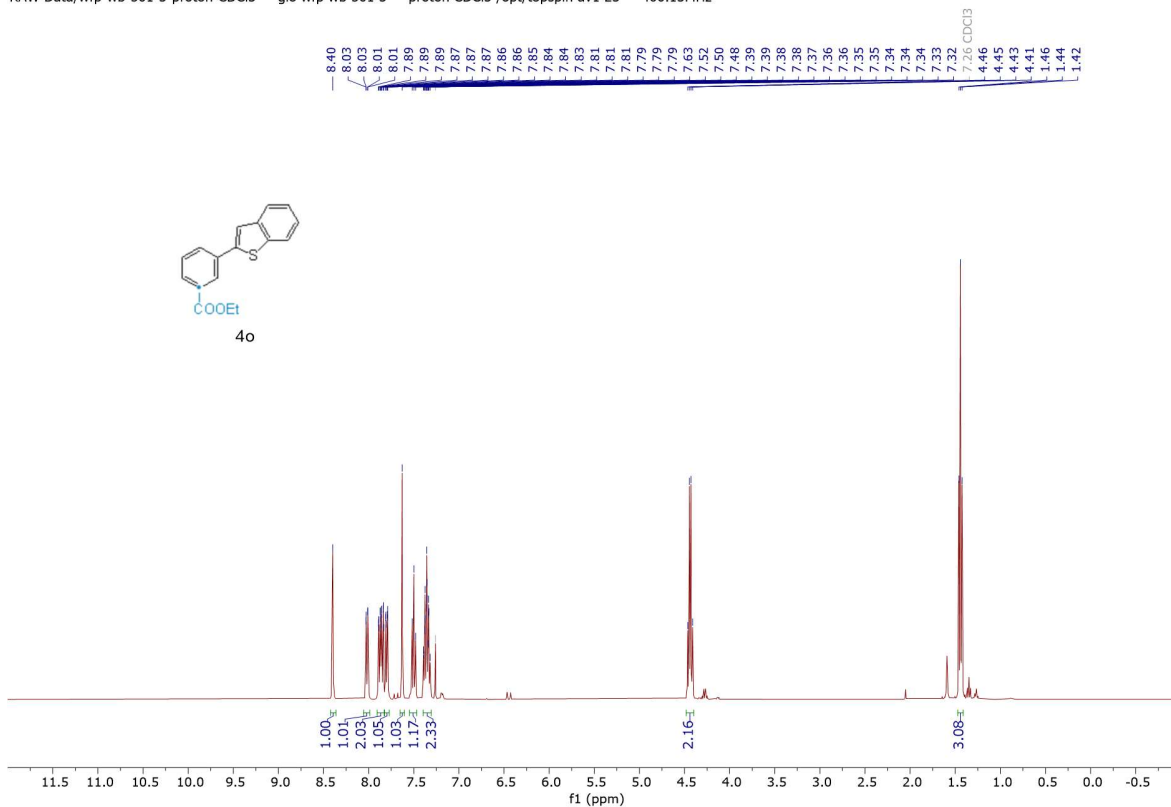

RAW Data/wfp-wb-501-3-carbon\_256-CDCl3 — glo wfp wb 501 3 — carbon\_256 CDCl3 /opt/topspin av1 23 — 100.62MHz

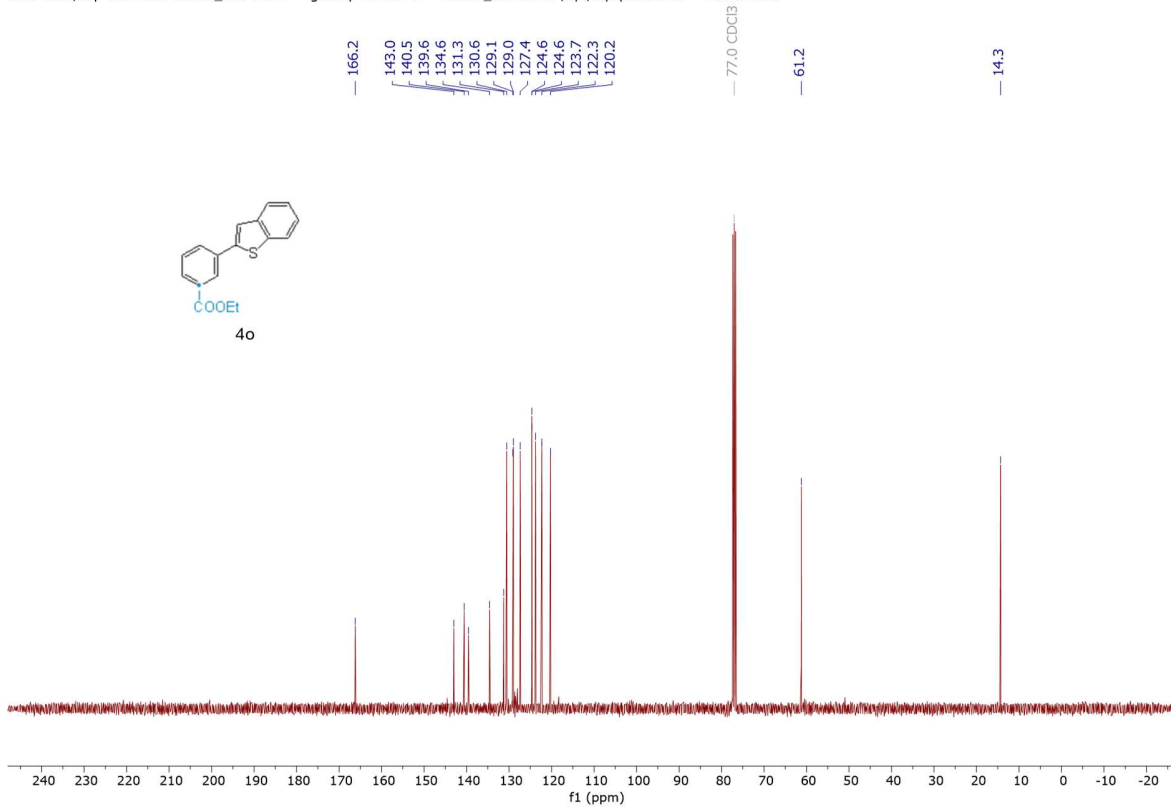

RAW Data/wfp-wb-523-proton-CDCl3 — glo wfp wb 523 — proton CDCl3 /opt/topspin av1 14 — 400.35MHz

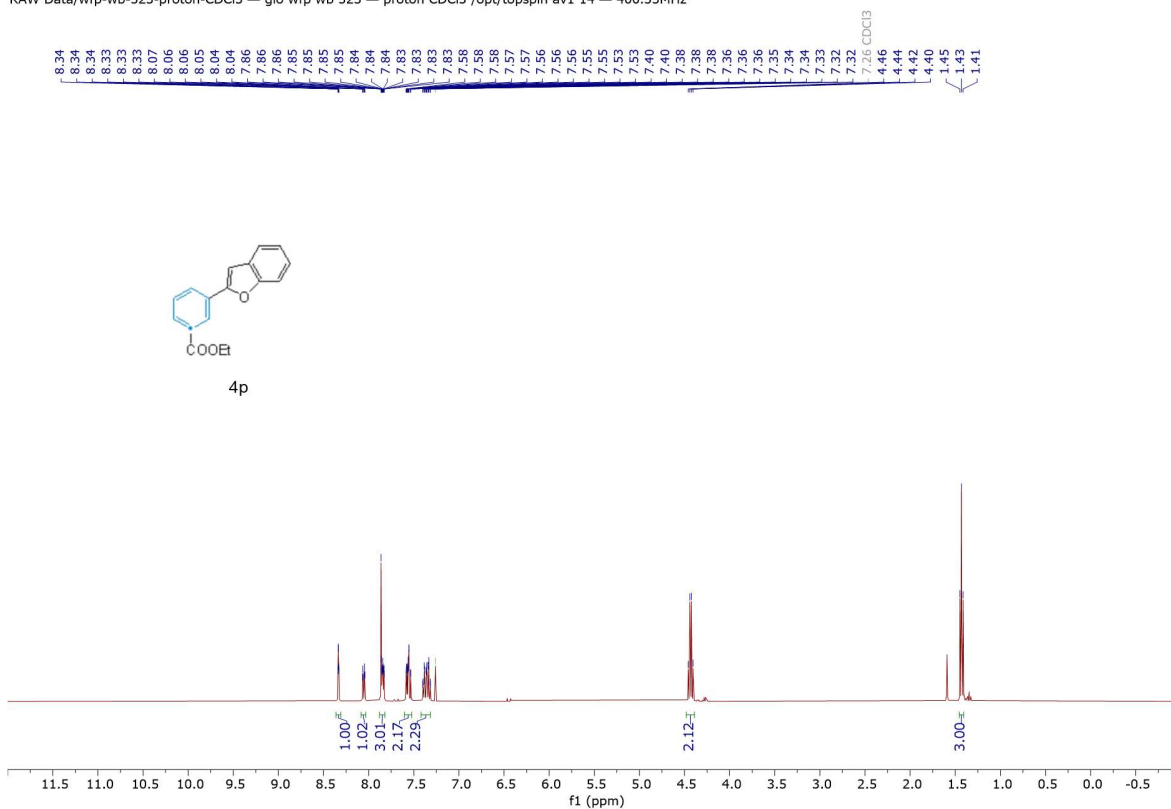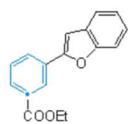

4p

RAW Data/wfp-wb-523-carbon\_256-CDCl3 — glo wfp wb 523 — carbon\_256 CDCl3 /opt/topspin av1 14 — 100.68MHz

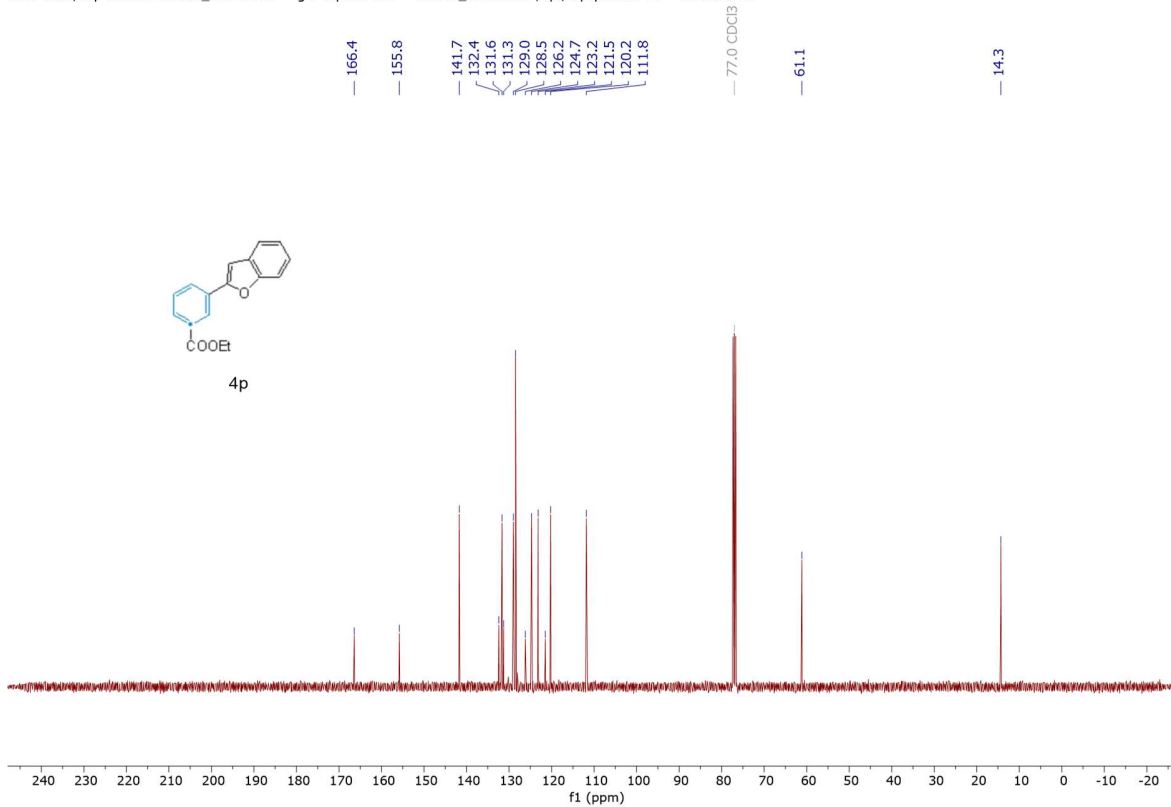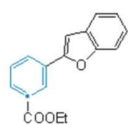

4p

RAW Data/wfp-wb-522-proton-CDCl3 — glo wfp wb 522 — proton CDCl3 /opt/topspin av1 13 — 400.35MHz

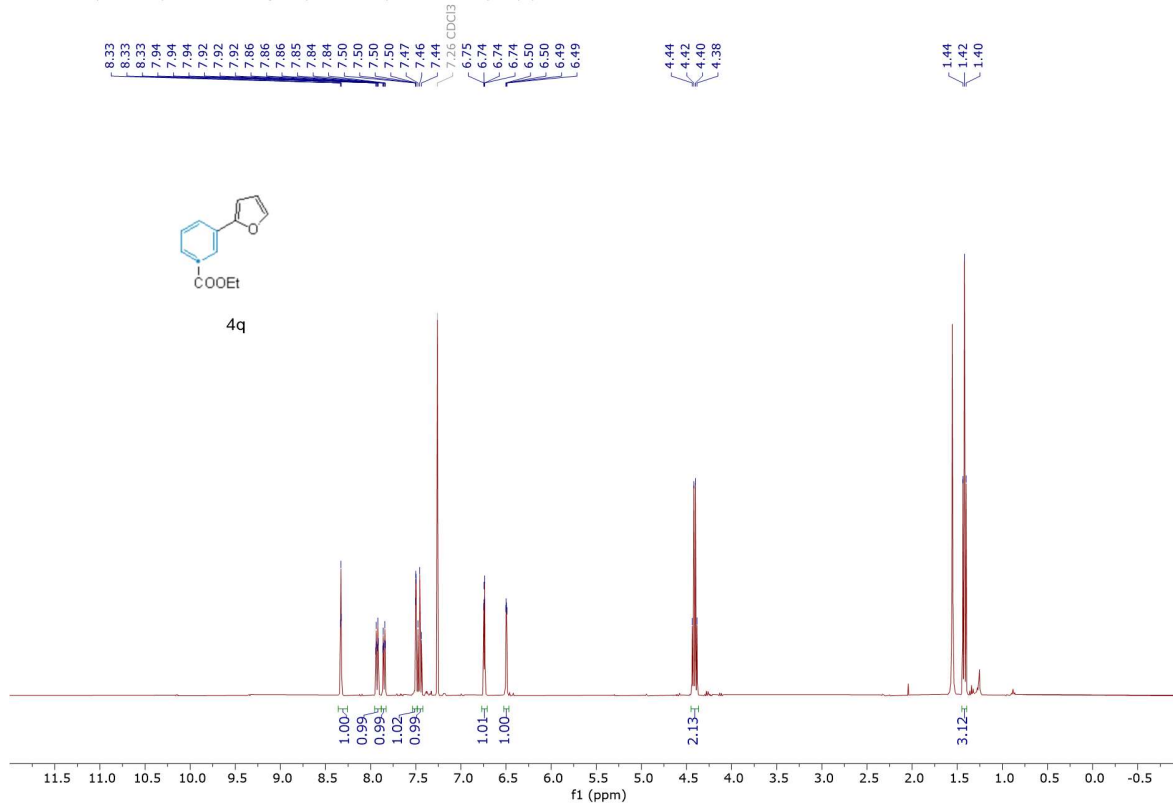

RAW Data/wfp-wb-522-carbon\_256-CDCl3 — glo wfp wb 522 — carbon\_256 CDCl3 /opt/topspin av1 13 — 100.68MHz

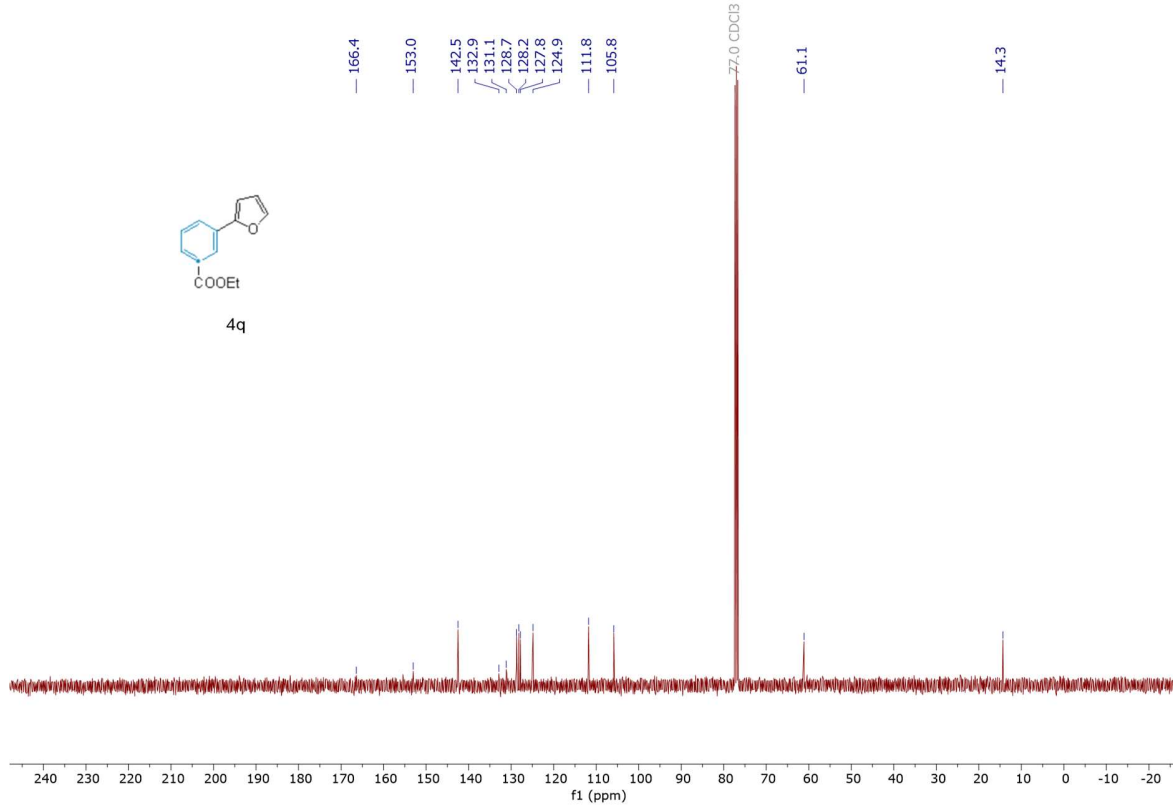

521/wfp-wb-521-proton-CDCl3 — glo wfp wb 521 — proton CDCl3 /opt/topspin av1 12 — 400.35MHz

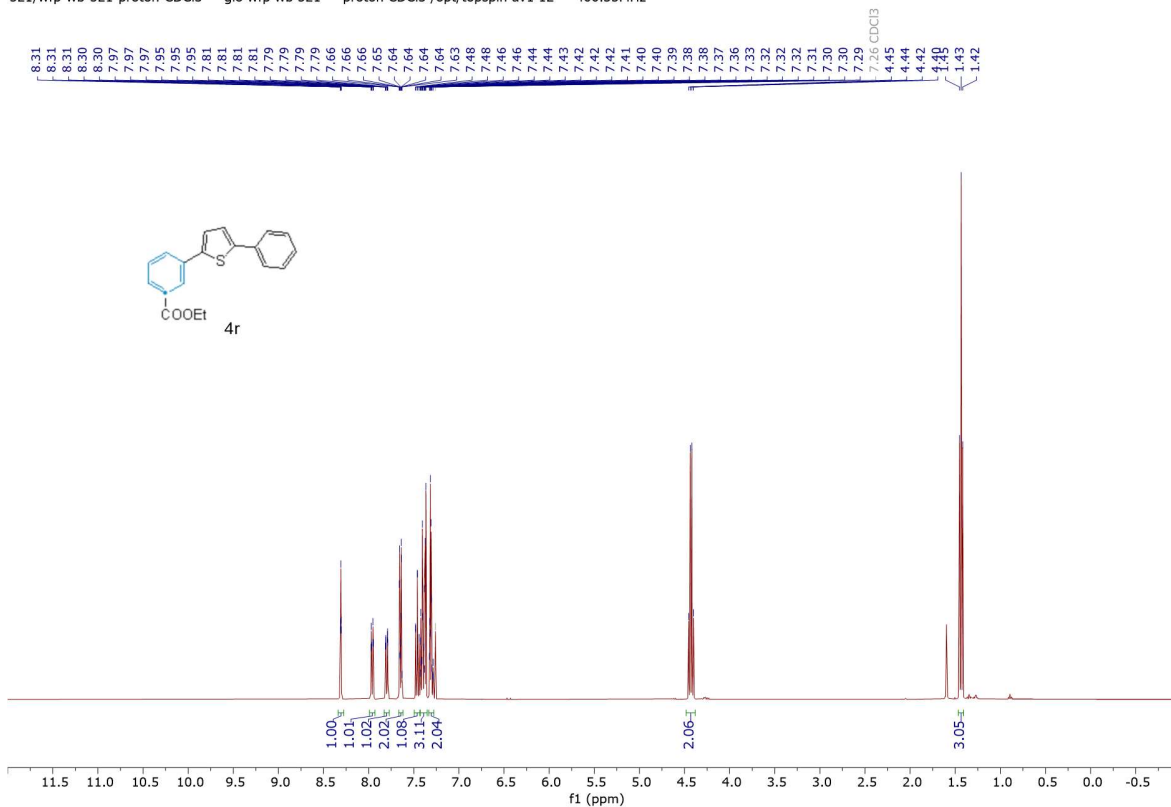

521/wfp-wb-521-carbon\_256-CDCl3 — glo wfp wb 521 — carbon\_256 CDCl3 /opt/topspin av1 12 — 100.68MHz

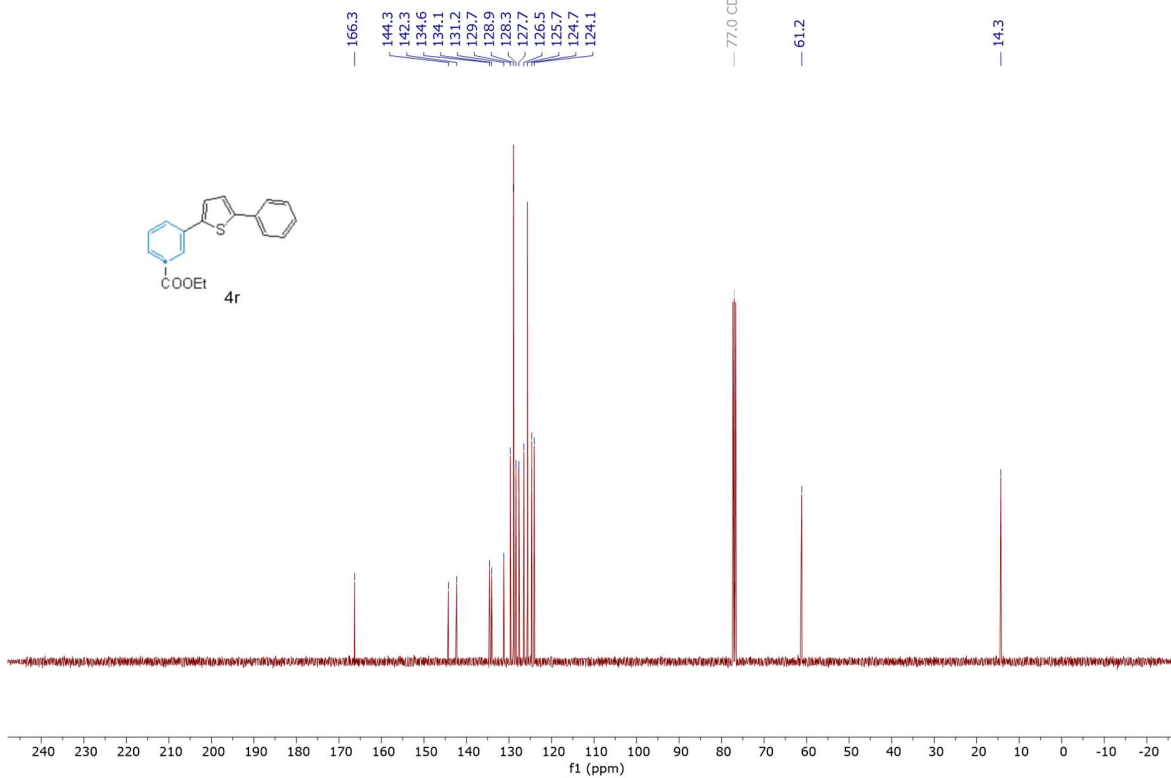

RAW Data/wfp-wb-635-3-proton-CDCl3 — glo wfp wb 635-3 — proton CDCl3 /opt/topspin av1 32 — 400.23MHz

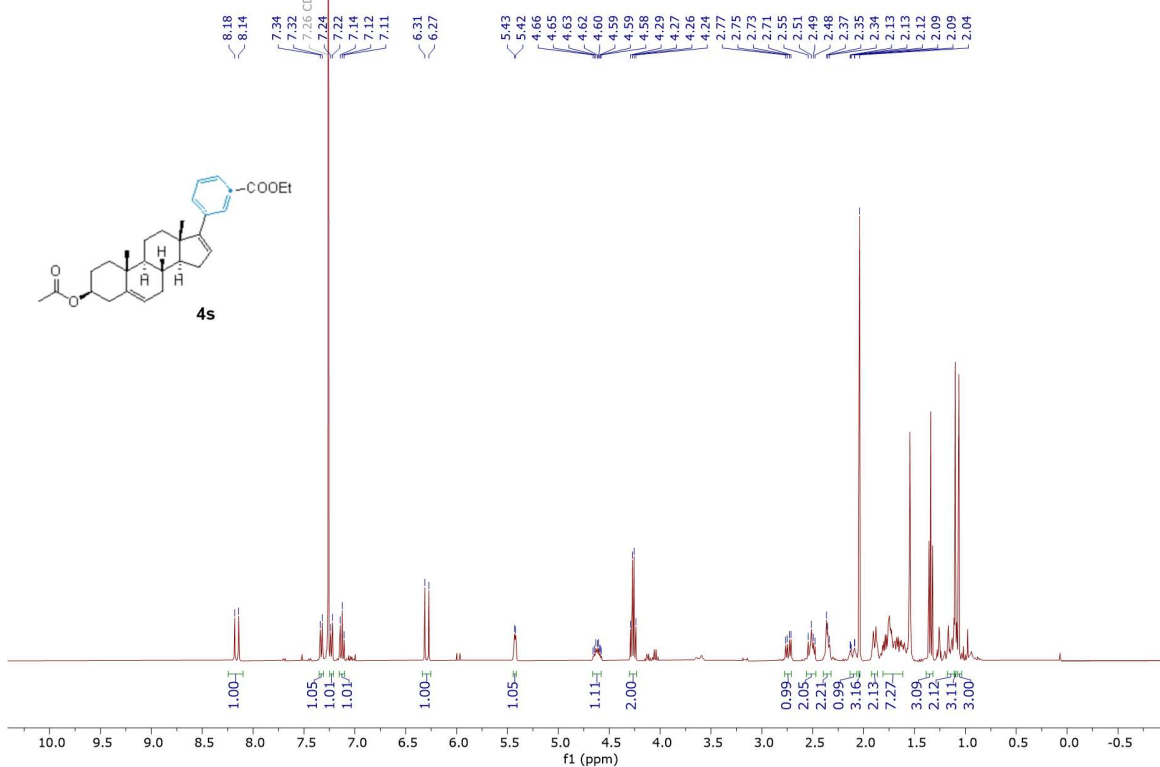

RAW Data/wfp-wb-635-carbon\_5120-CDCl3 — glo wfp wb 635 — carbon\_5120 CDCl3 /opt/topspin av1 20 — 100.68MHz

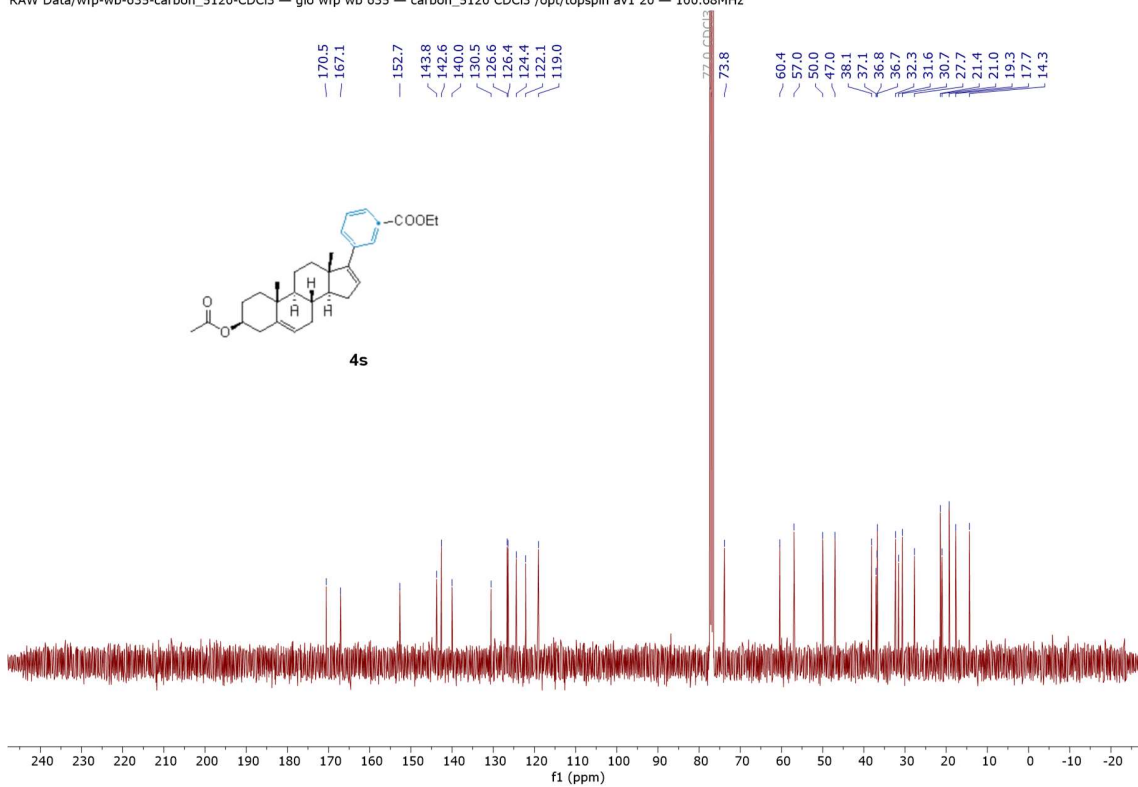

RAW Data/wfp-wb-634-proton-CDCl3 — glo wfp wb 634 — proton CDCl3 /opt/topspin av1 3 — 400.23MHz

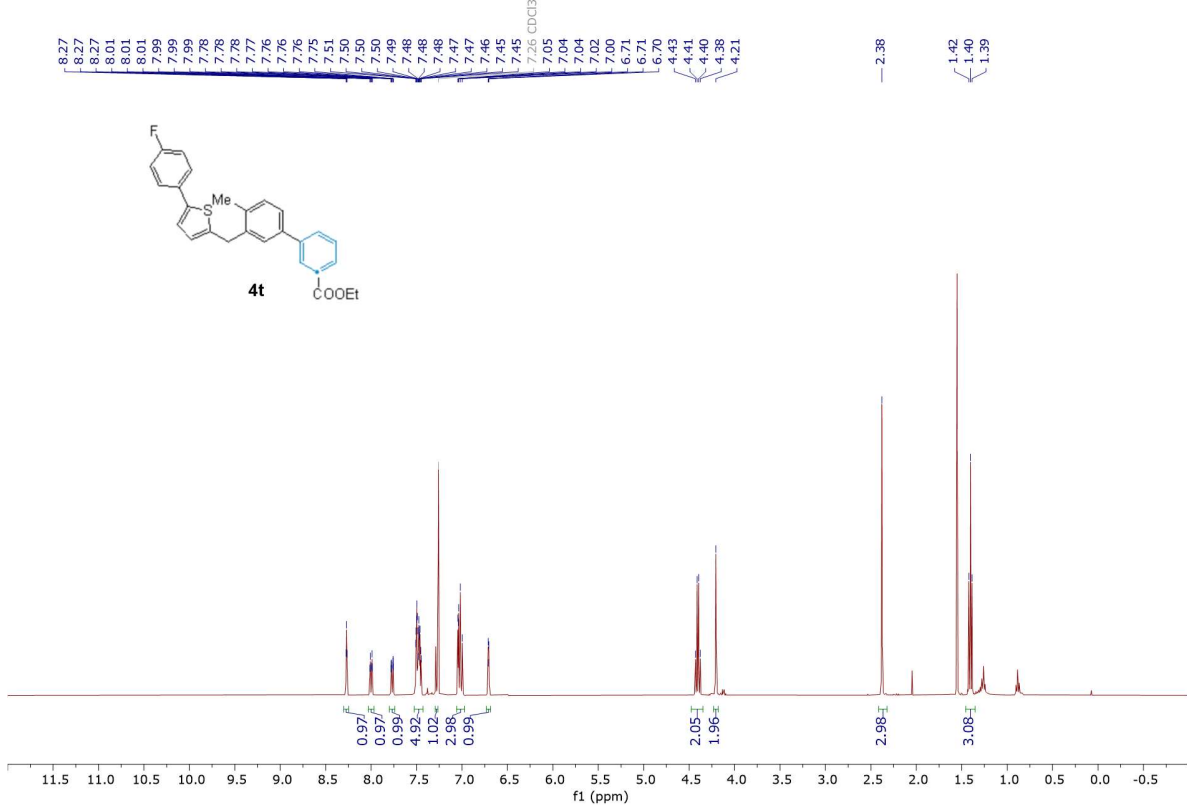

RAW Data/wfp-wb-634-carbon\_5120-CDCl3 — glo wfp wb 634 — carbon\_5120 CDCl3 /opt/topspin av1 19 — 100.68MHz

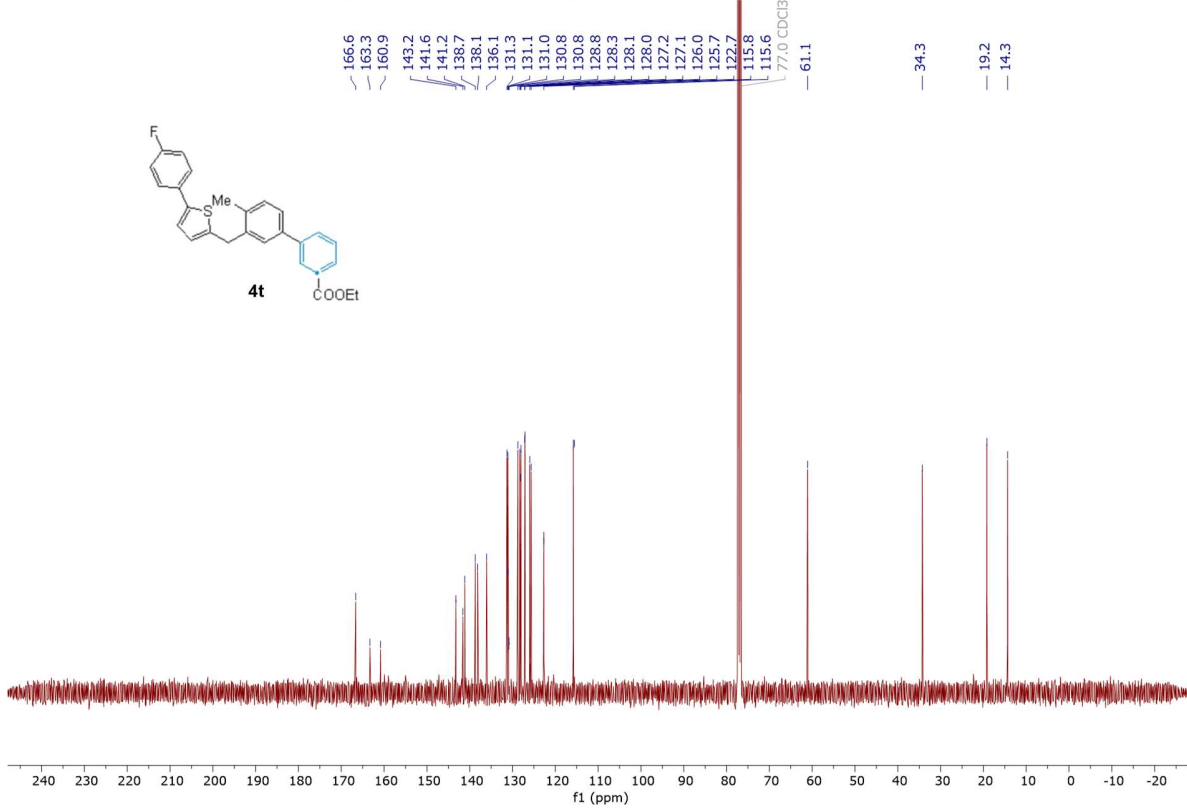

516/wfp-wb-516-proton-CDCl3 — glo wfp wb 513 3 — proton CDCl3 /opt/topspin av1 3 — 400.35MHz

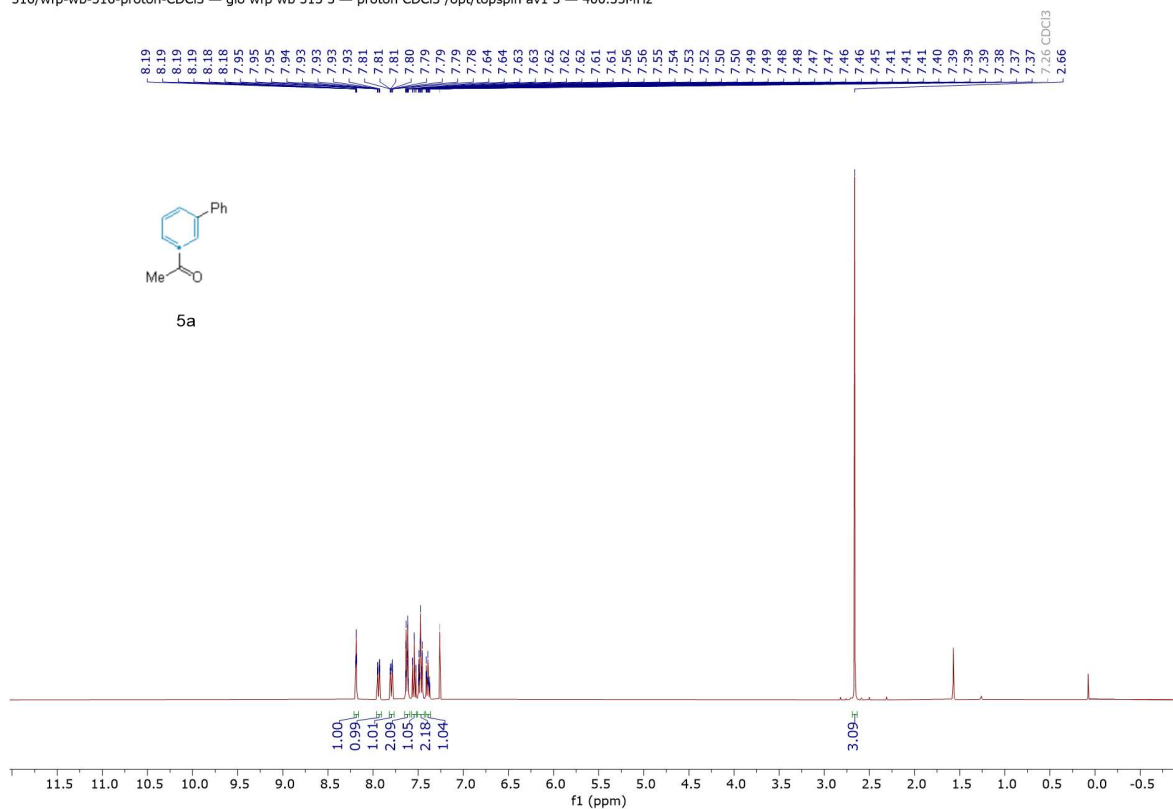

516/wfp-wb-516-carbon\_256-CDCl3 — glo wfp wb 513 3 — carbon\_256 CDCl3 /opt/topspin av1 3 — 100.68MHz

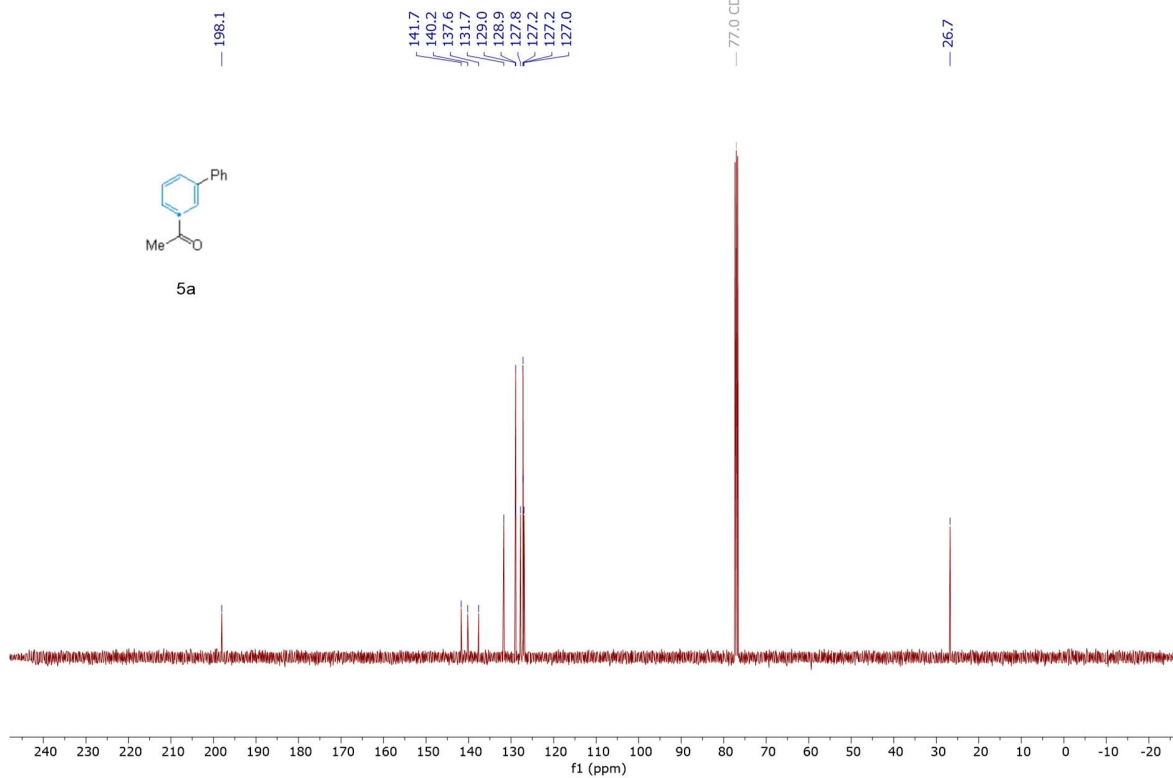

519/wfp-wb-519-proton-CDCl3 — glo wfp wb 519 — proton CDCl3 /opt/topspin av1 15 — 400.35MHz

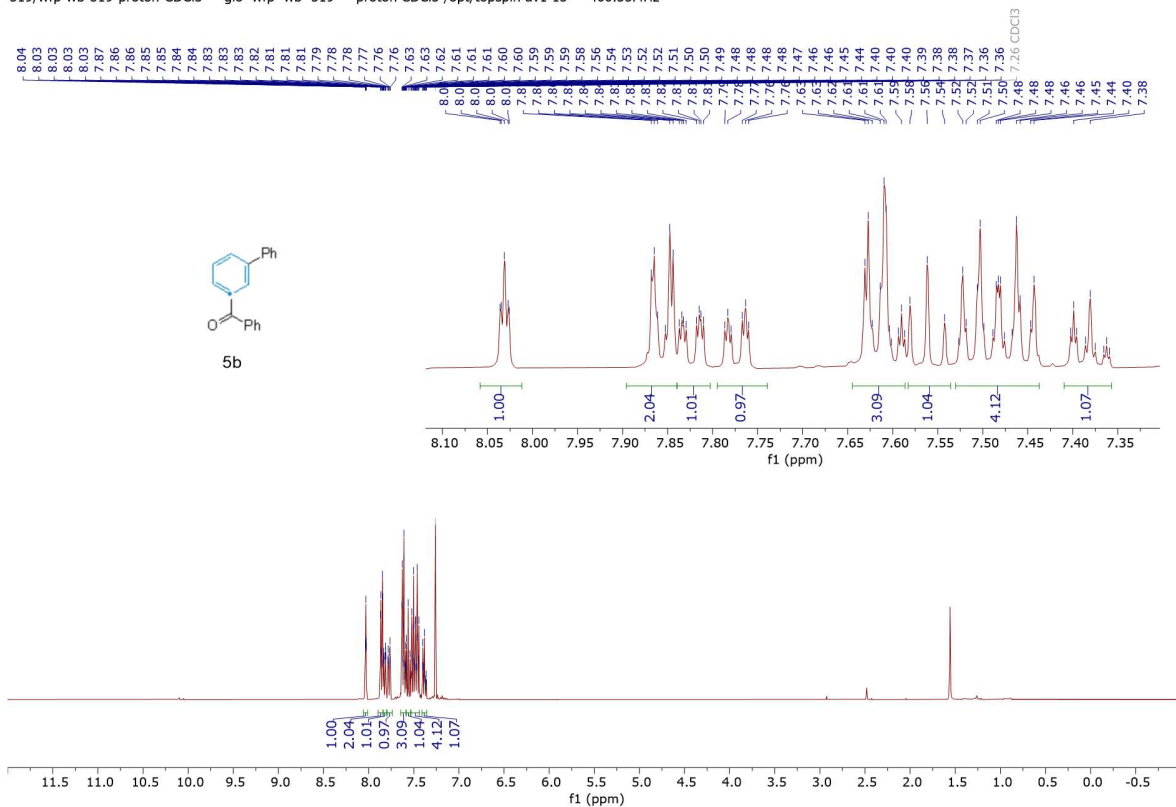

519/wfp-wb-519-carbon-CDCl3 — glo wfp wb 519 — carbon CDCl3 /opt/topspin av1 15 — 100.68MHz

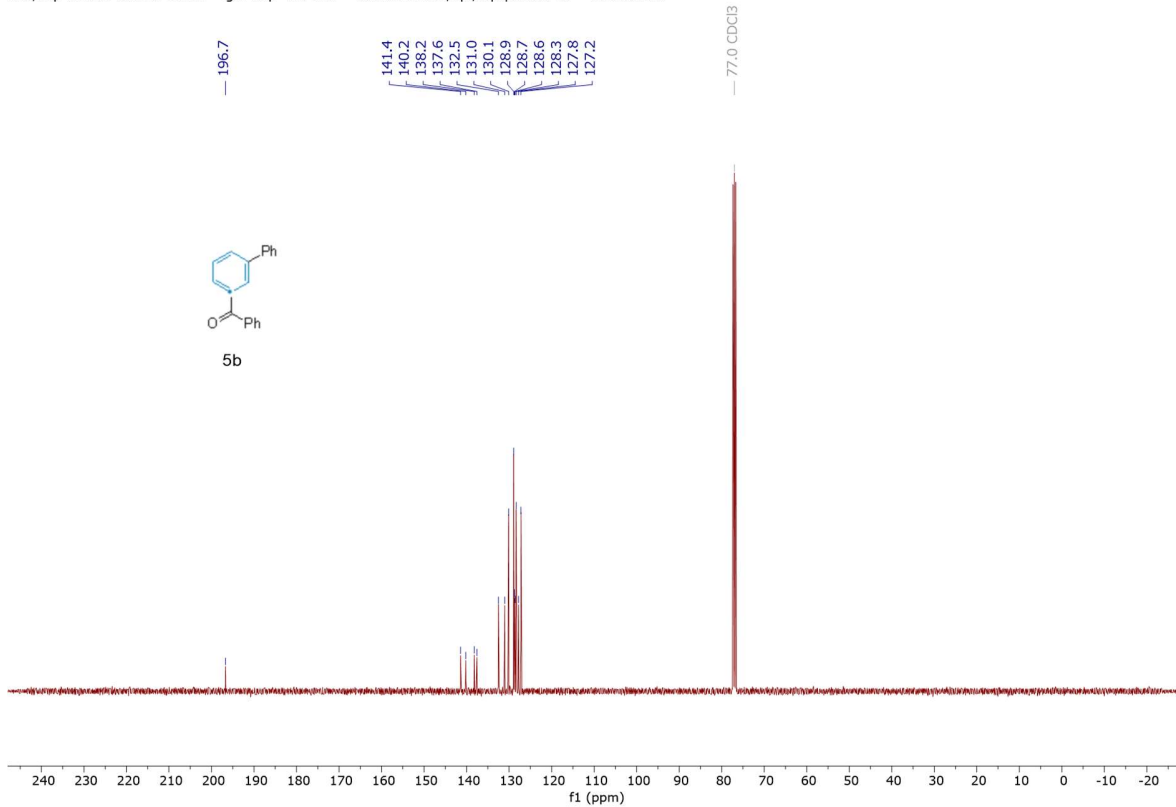



517/wfp-wb-517-proton-CDCl3 — glo wfp wb 513 4 — proton CDCl3 /opt/topspin av1 4 — 400.35MHz

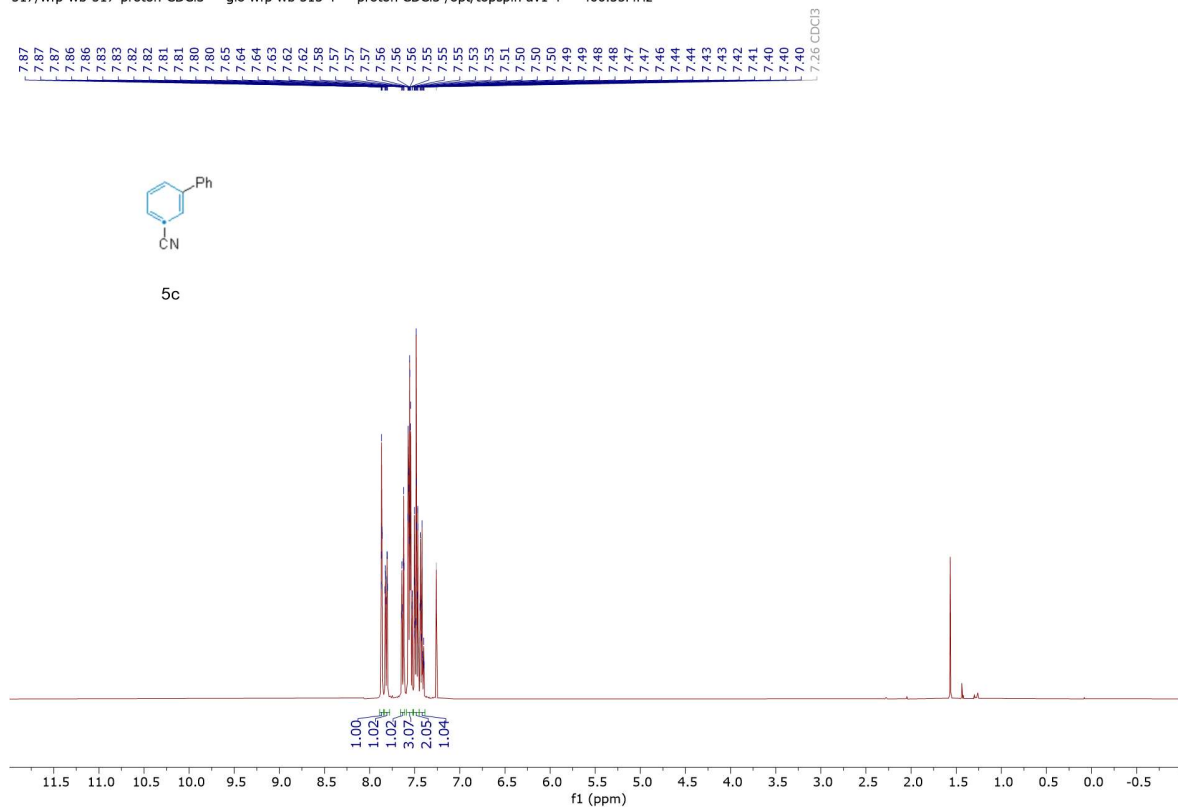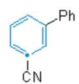

5c

517/wfp-wb-517-carbon\_256-CDCl3 — glo wfp wb 513 4 — carbon\_256 CDCl3 /opt/topspin av1 4 — 100.68MHz

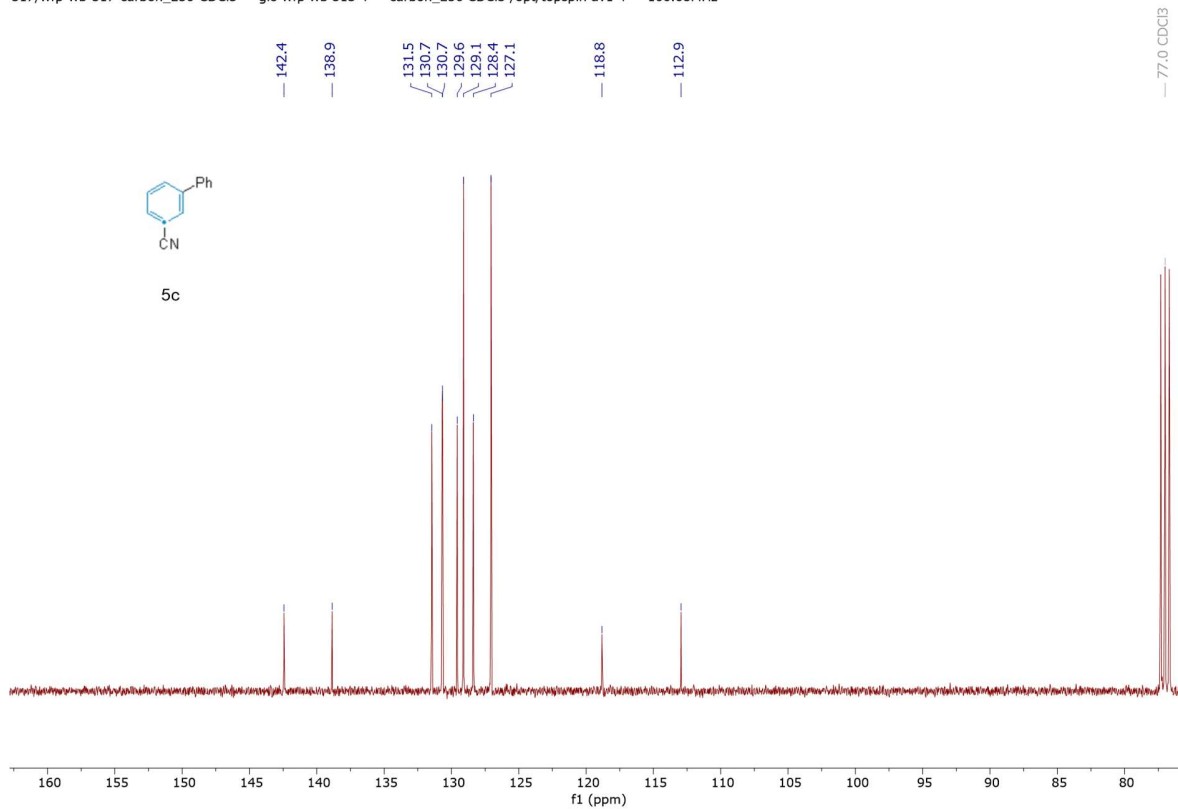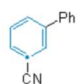

5c

518/wfp-wb-518-proton-CDCl3 — glo wfp wb 518 — proton CDCl3 /opt/topspin av1 2 — 400.35MHz

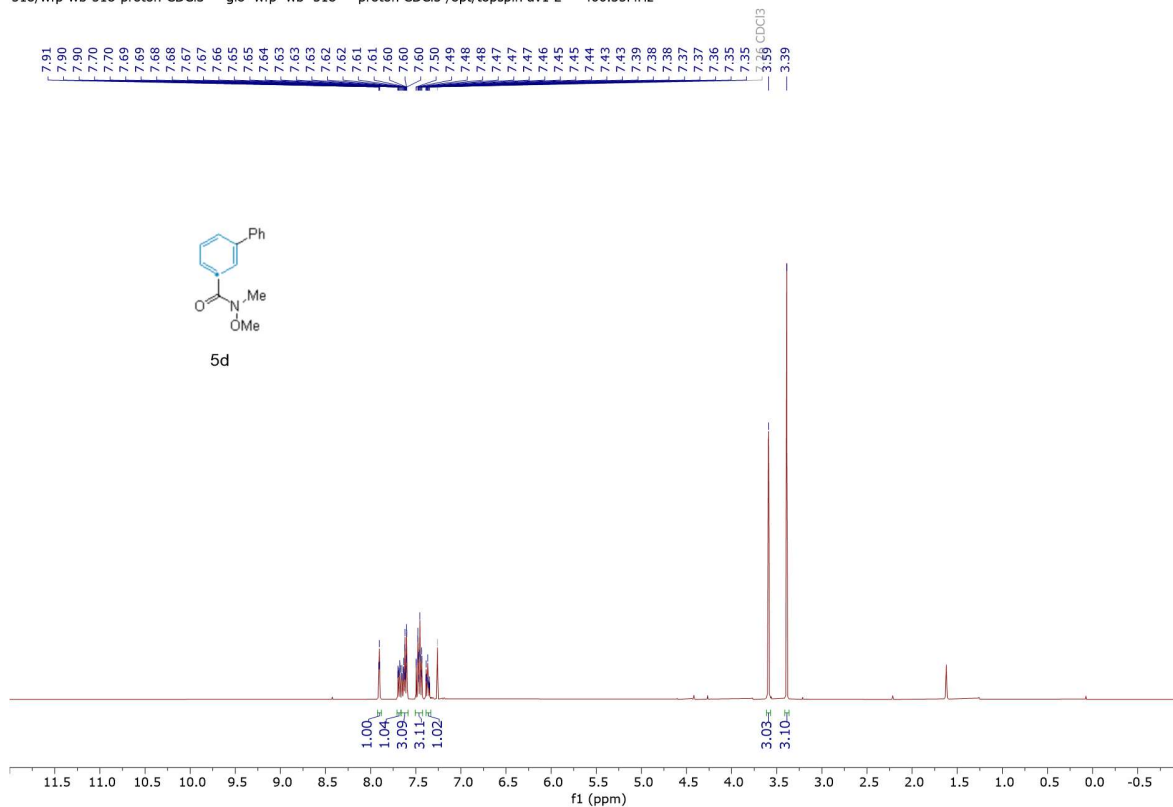

518/wfp-wb-518-carbon-CDCl3 — glo wfp wb 518 — carbon CDCl3 /opt/topspin av1 2 — 100.68MHz

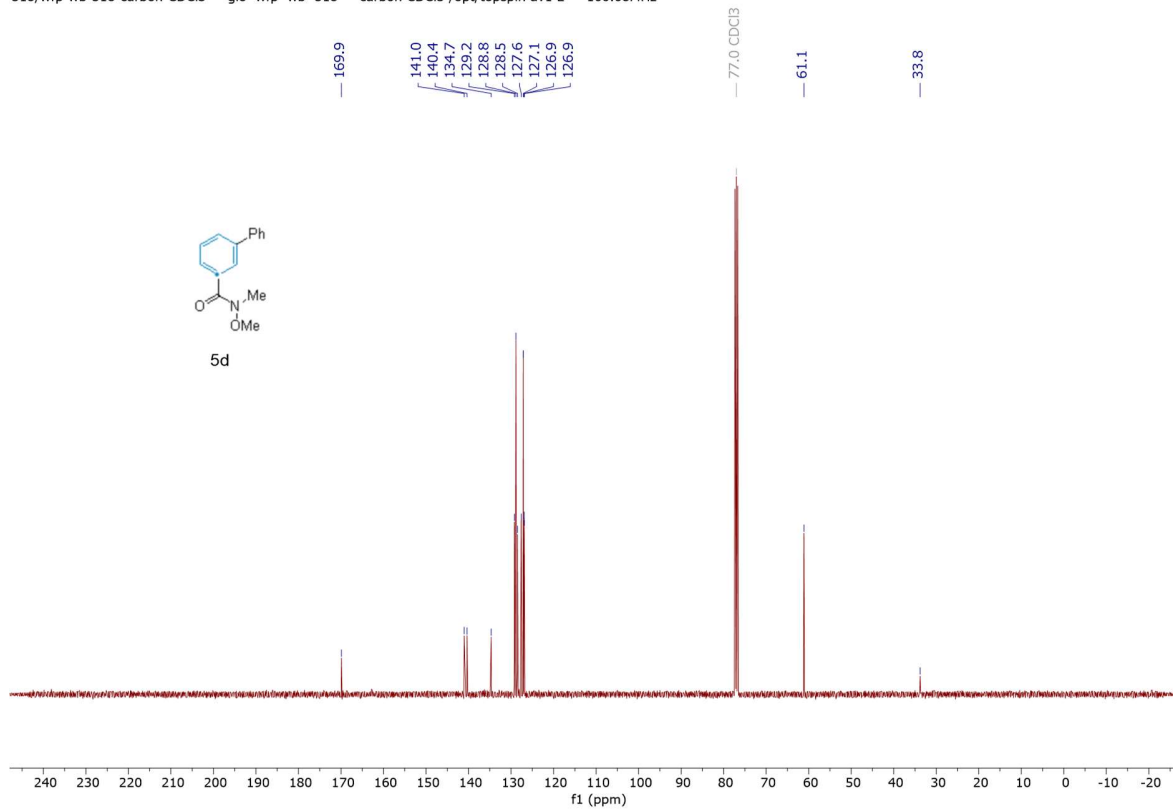

RAW Data/wfp-wb-520-proton-CDCl3-2 — glo wfp wb 520 — proton CDCl3 /opt/topspin av1 3 — 400.35MHz

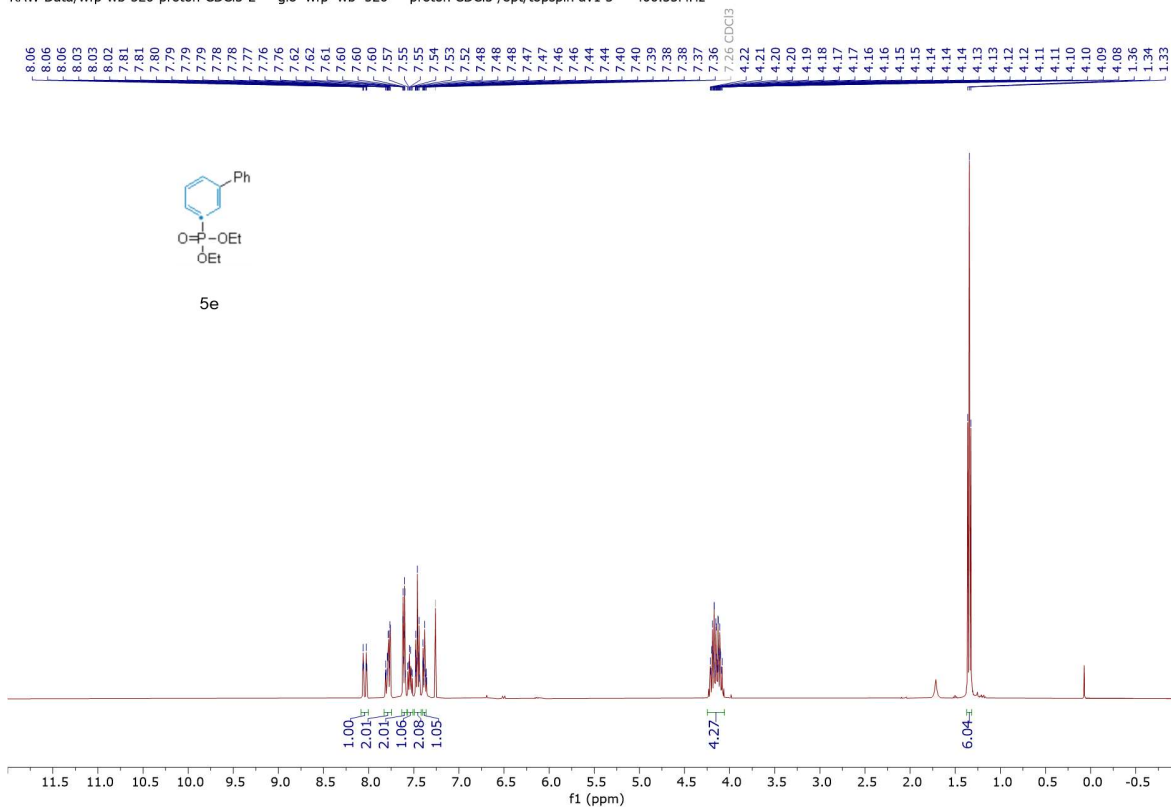

RAW Data/wfp-wb-520-carbon-CDCl3-2 — glo wfp wb 520 — carbon CDCl3 /opt/topspin av1 3 — 100.68MHz

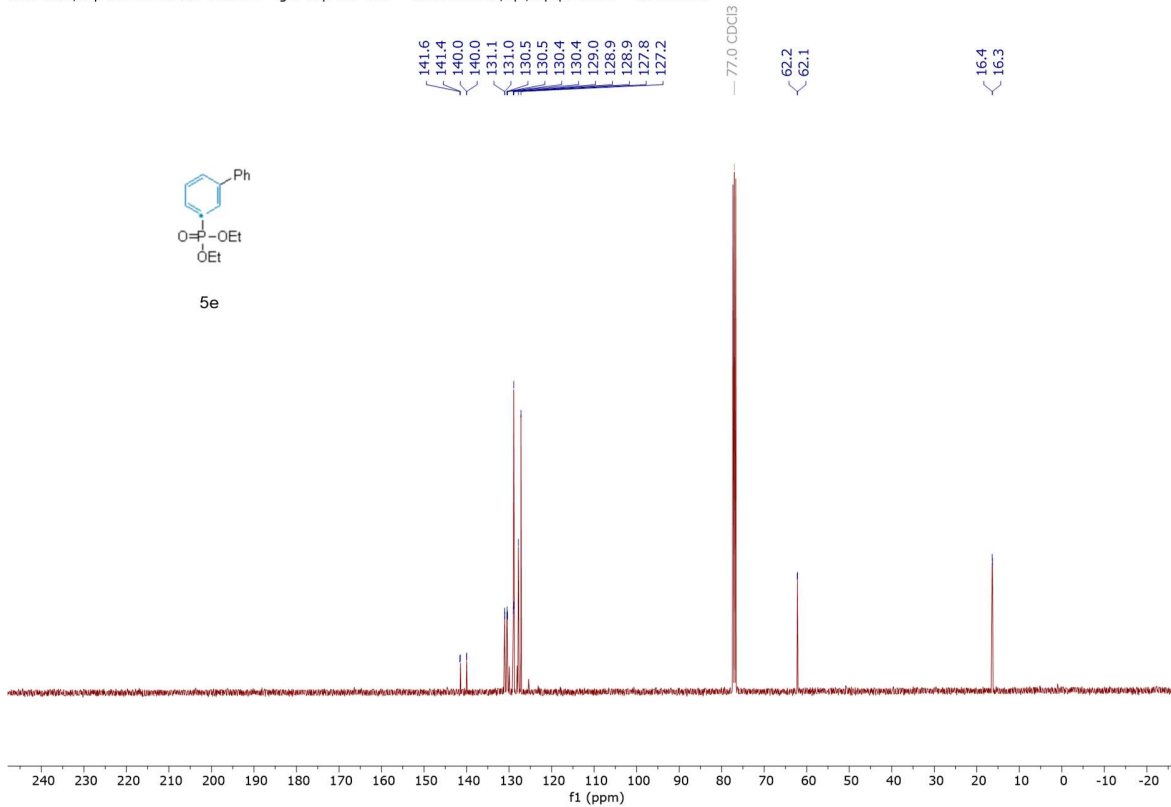

RAW Data/wfp-wb-520-p31cpd-CDCl3-2 — glo wfp wb 520 — p31cpd CDCl3 /opt/topspin av1 3 — 162.06MHz

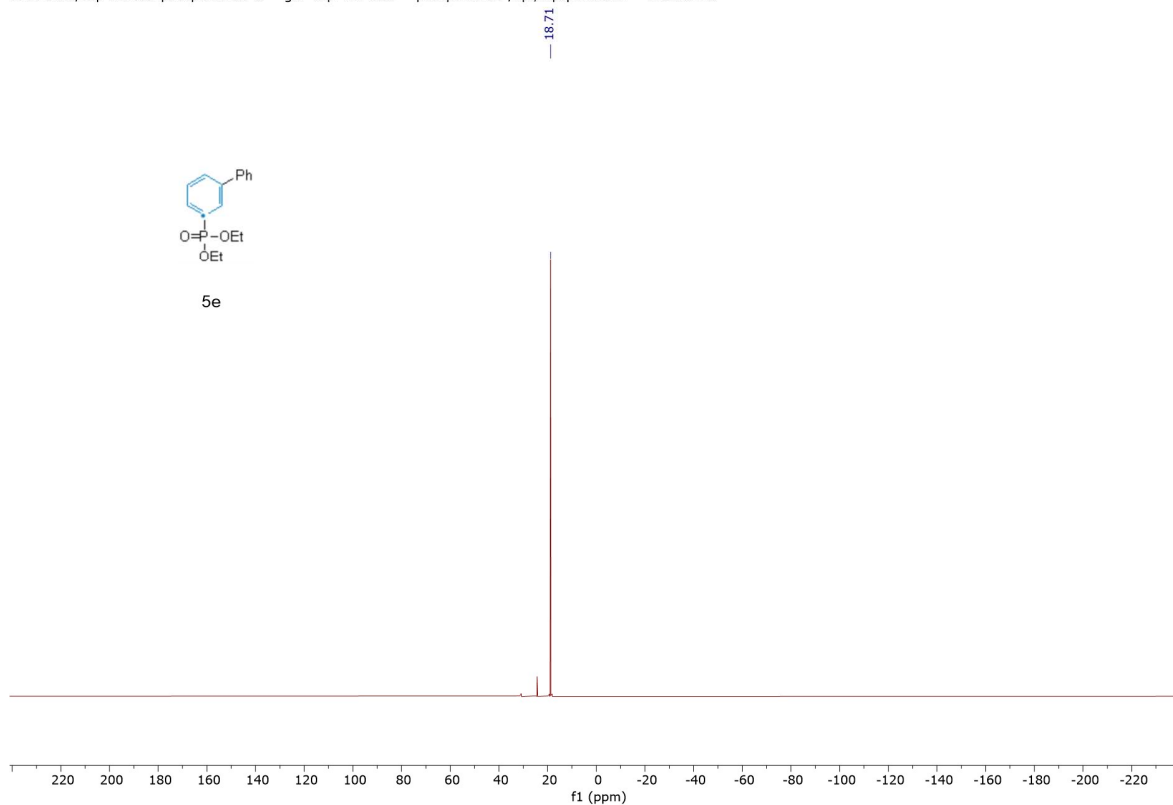

RAW Data/wfp-wb-528-proton-CDCl3 — glo wfp wb 528 — proton CDCl3 /opt/topspin av1 3 — 400.35MHz

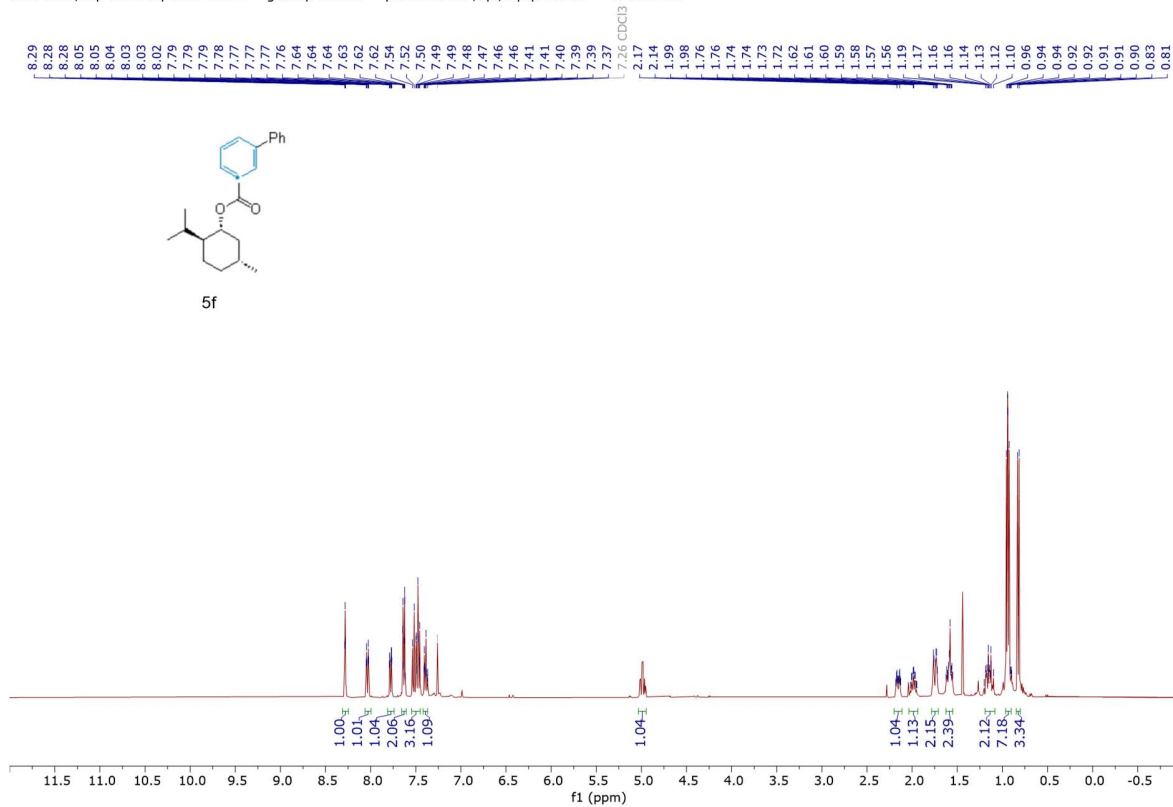

RAW Data/wfp-wb-528-proton-CDCl3 — glo wfp wb 528 — proton CDCl3 /opt/topspin av1 3 — 400.35MHz

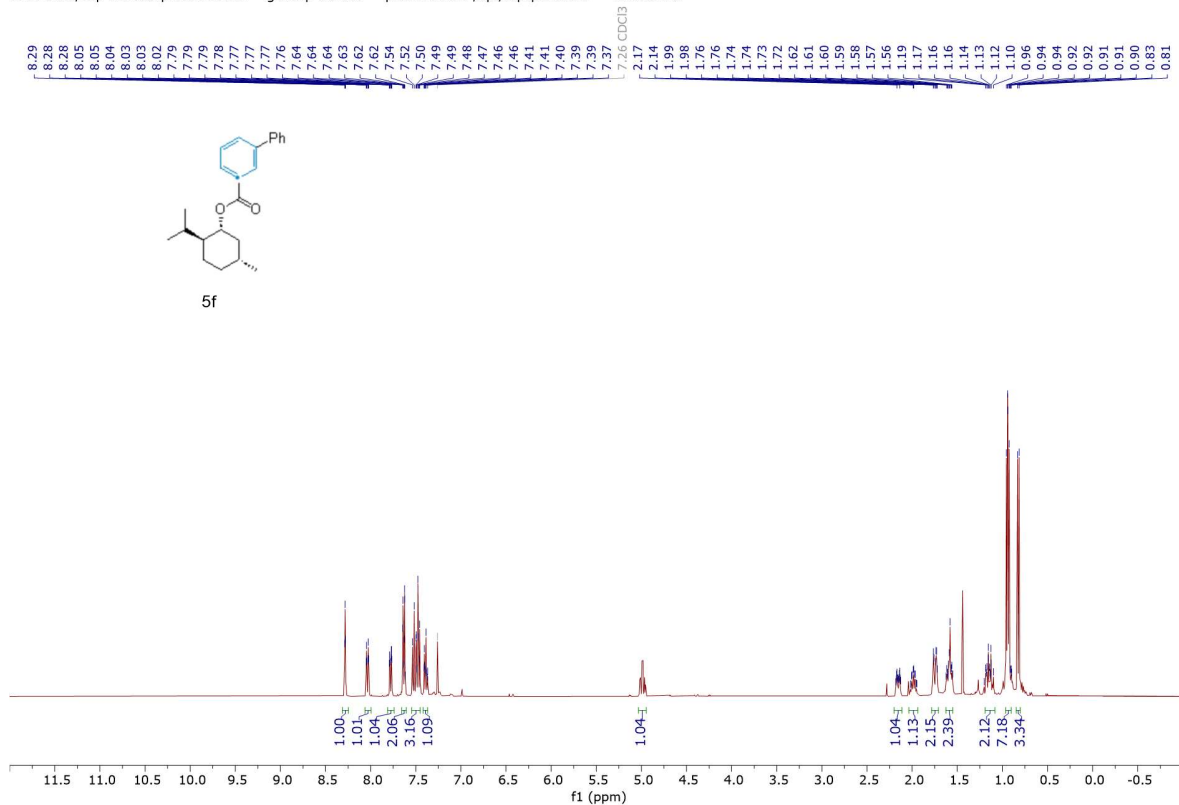

Supplement: d4sc04413d1.pdf [file d4sc04413d1.pdf]
